# Supplementary material for: Deciphering the architecture and interactome of hnRNP proteins and enigmRBPs
Source: Royal Society of Chemistry journal article supplement (doi:10.1039/d1mo00024a), 2021-05-20
Supplement: d1mo00024a1.pdf [file d1mo00024a1.pdf]

## SUPPLEMENTARY INFORMATION

**Supplementary material 1. Complete information on HeLa lysates crosslinked with amide BDP-NHP.** Table comprises the crosslinking information for the whole dataset, replicates 1 and 2 separately, and specifically for RNA-binding proteins. pep A,B: cross-linked peptides; position A,B: corresponding number of the cross-linked residue in the protein sequence; accession A,B: protein accession number; Uniprot A,B: protein entry from Uniprot; modpos A,B: position of the cross-linked peptide in the protein sequence; PDB A,B: PDB structure identifier; PDB type: indicates if the PDB structure was modelled (e.g., Phyre, Modeller) or resulted from structural experiments; XL distance: distance in Å based on PDB structures; type: type of cross-linking found, if intra or inter-link. Information includes 2 technical replicates. The number of identifications, confidence (*p-value*), scan number of the identification, and ion charge are informed.

(a)

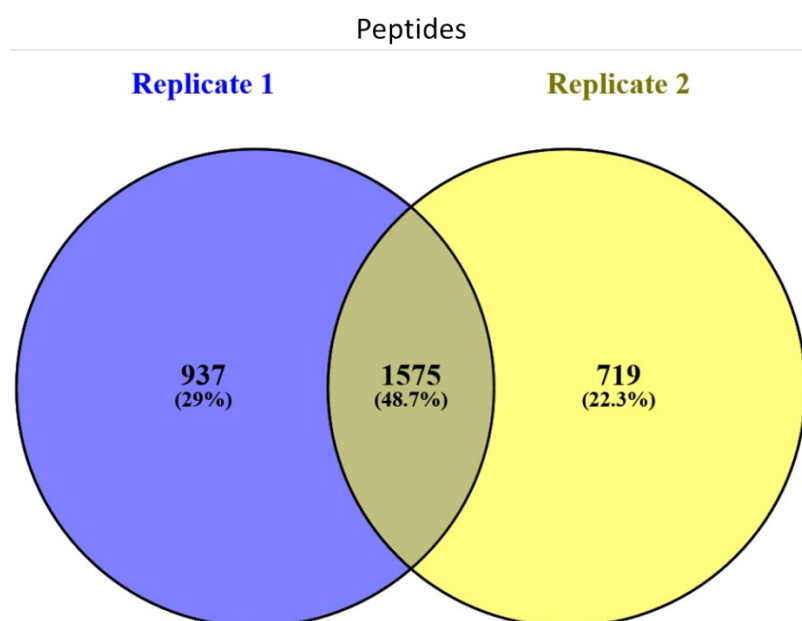

(b)

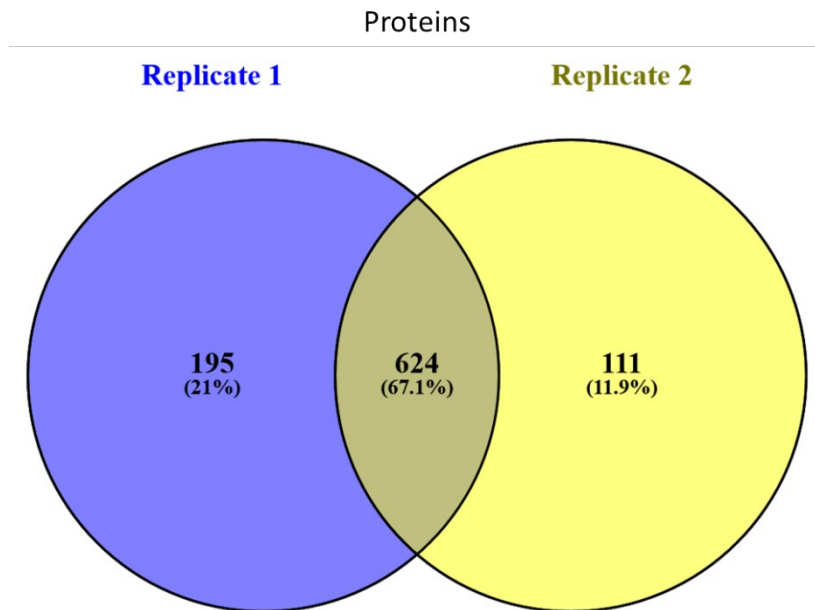

**Supplementary material 2. Venn diagram of crosslinked peptides identified with the two replicates.** (a) A total of 3,231 crosslinks were identified with 1% FDR before upload to XLinkDB. From those, 937 were identified uniquely in the first replicate, 719 uniquely in the second, and 1,575 were common to both replicates. (b) A total of 930 non-redundant proteins were identified. From those, 195 were unique to replicate 1, 111 to replicate 2, and 624 proteins were common to the two replicates. A total of 2,207 non-redundant crosslinks were uploaded to XLinkDB with estimated 1% FDR and probability>0.5, corresponding to 795 protein pairs (Supplementary material 1). XLinkDB applies statistical filters that could lead to a lower number of crosslinks uploaded to the database<sup>77</sup>.

(a)

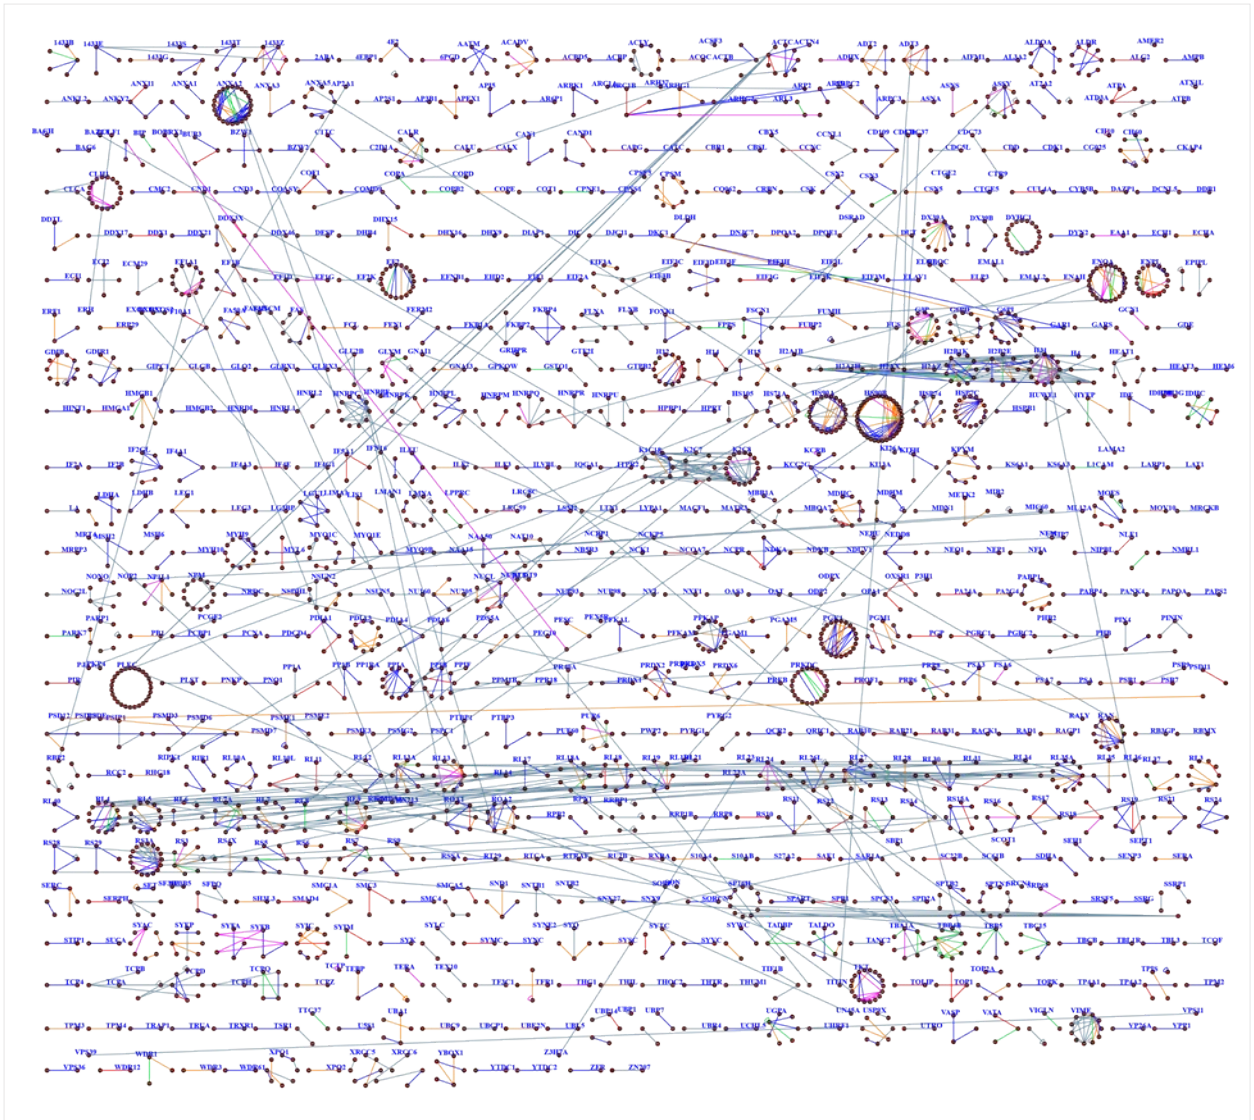

(b)

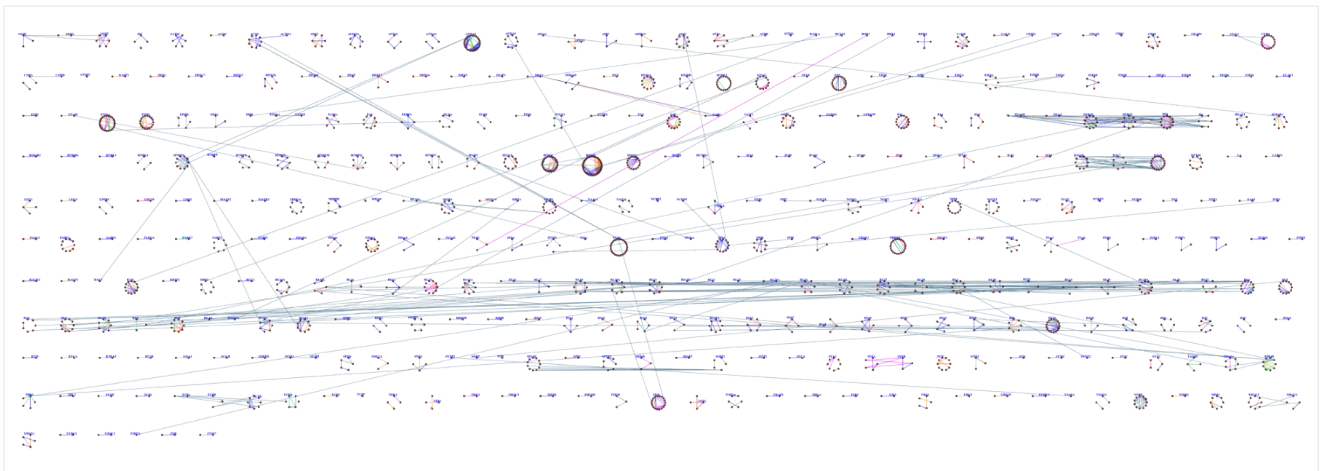

**Supplementary material 3. Crosslinking interaction network.** (a) Crosslinking interaction network of the whole dataset and (b) for crosslinks happening in RNA-binding proteins.

XLinkDB uses Cytoscape<sup>78</sup> to generate protein interaction networks for visualization and analysis of protein interactors. Distance in PDB Context (Å): in red, distances under 10, in blue, distances from 10 to 20, in orange, distances from 20 to 30, in green, 30 to 40, and in magenta, distances of 40 or greater.

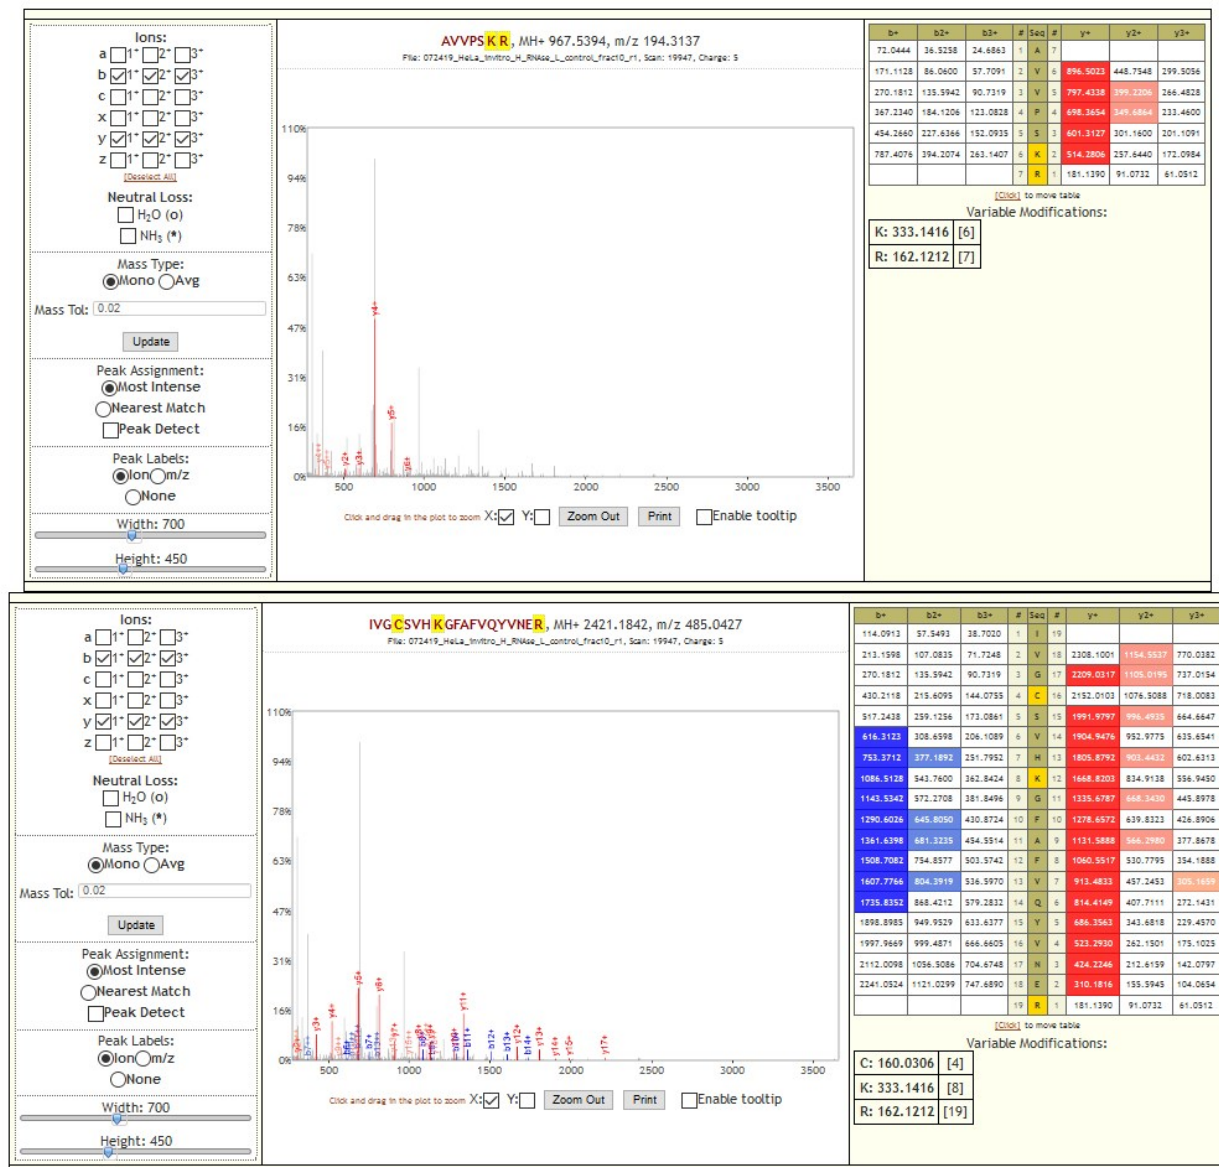

**Supplementary material 4. Tandem mass spectra of crosslinked peptides.** MS2 spectra view of peptides AVVPSK<sup>157</sup>R and IVGCSVHK<sup>50</sup>GFAFVQYVNER of hnRNPC, with b and y fragment ions of crosslinked peptides shown on the right panel, in blue and red, respectively. XLinkDB uses Lorikeet (<https://uwpr.github.io/Lorikeet/>) to generate the spectrum view and integrates it to the interaction table<sup>77</sup>.



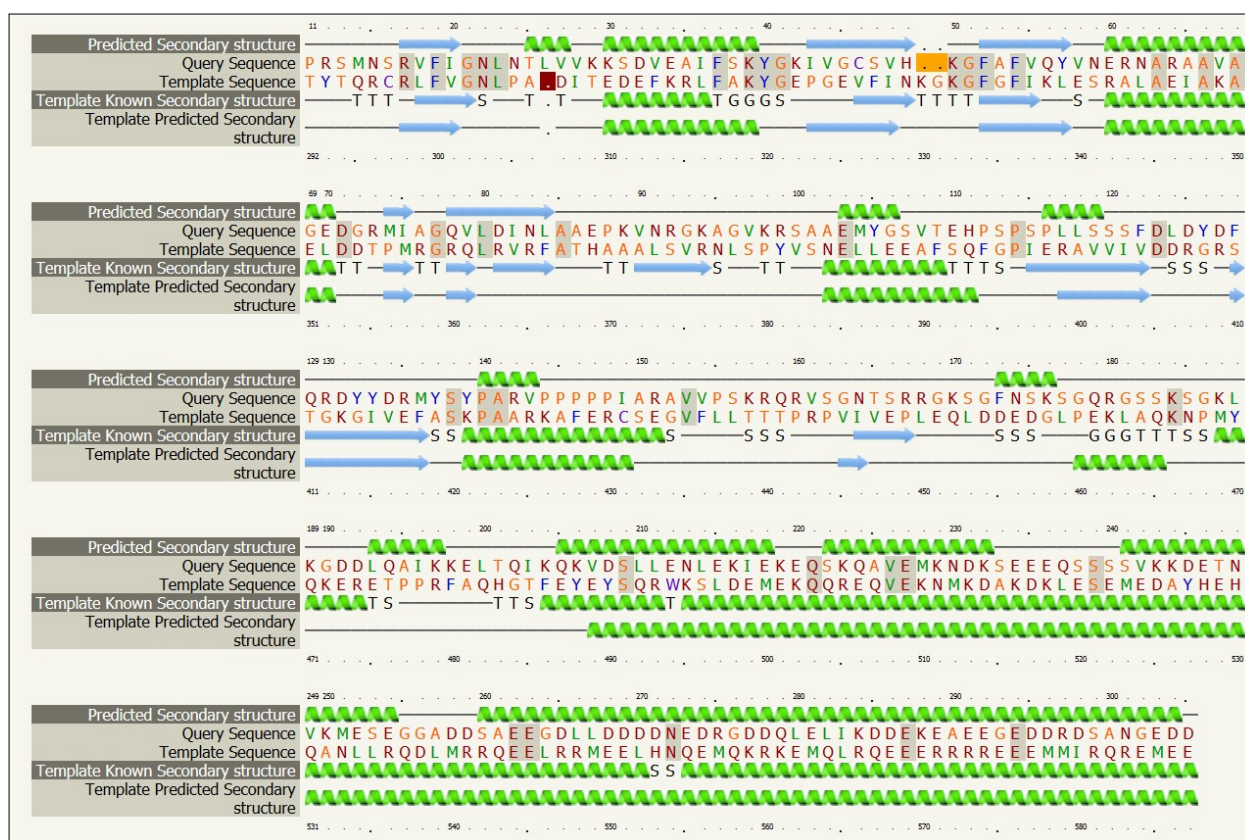

**Supplementary material 5. Phyre2 alignment of hnRNPC and SFPQ protein sequences.**  
 hnRNPC: query sequence; SFPQ: template sequence.

**Supplementary material 6. Crosslinking information on EnigmRBPs.** pep A,B: cross-linked peptides; startPosA,B: corresponding number of the cross-linked residue in the protein sequence; accession A,B: protein accession number; Uniprot A,B: protein entry from Uniprot; modpos A,B: position of the cross-linked peptide in the protein sequence; PDB A,B: PDB structure identifier; PDB type: indicates if the PDB structure was modelled (e.g., Phyre, Modeller) or resulted from structural experiments; XL distance: distance in Å based on PDB structures; type: type of cross-linking found, if intra or inter-link. Information includes 2 technical replicates. The number of identifications, confidence (*p-value*), scan number of the identification, ion charge, and gene ontology analysis are informed.
