# Supplementary material for: Deciphering the architecture and interactome of hnRNP proteins and enigmRBPs
Source: Royal Society of Chemistry journal article supplement (doi:10.1039/d1mo00024a), 2021-05-20
Supplement: d1mo00024a2.xlsx [file d1mo00024a2.xlsx]

## Sheet: total
pepA	positionA	accessionA	uniprotA	modposA	startPosA	pdbA	pdbA_type	siteA	atomNumA	pepB	positionB	accessionB	uniprotB	modposB	startPosB	pdbB	pdbB_type	siteB	atomNumB	distance	NetworkDistance	NumberIDs	Confidence	NumProtABLink	MS2ScanNum	MS2PrecCharge
KEPELQR	0	A1IGU5	ARH37_HUMAN	137	136	A1IGU5_A1IGU5	Docking	137:A	980	KEPELQR	0	A1IGU5	ARH37_HUMAN	137	136	A1IGU5_A1IGU5	Docking	137:B	980	16.97	N/A	2	0.9	1	10393	4
SAALKK	4	A1L0T0	ILVBL_HUMAN	342	337	A1L0T0	Phyre	342:A	1899	VLSHSSKIIIVNR	6	A1L0T0	ILVBL_HUMAN	369	362	A1L0T0	Phyre	369:A	2103	11.29	Intra	1	0.97	1	14781	5
AAYAEKLR	5	A6NDG6	PGP_HUMAN	80	74	A6NDG6	Phyre	80:A	525	LGFITNNSSKTR	9	A6NDG6	PGP_HUMAN	72	62	A6NDG6	Phyre	72:A	462	9.3	Intra	2	1	1	17454	4
LCAAAASILGKPADR	10	A6NHG4	DDTL_HUMAN	33	22	A6NHG4	Phyre	33:A	227	SHSAHFFEFLTKELALGQDR	11	A6NHG4	DDTL_HUMAN	87	75	A6NHG4	Phyre	87:A	620	24.12	Intra	3	1	2	29501	6
VPAGLEKR	6	A6NHG4	DDTL_HUMAN	21	14	A6NHG4	Phyre	21:A	147	SHSAHFFEFLTKELALGQDR	11	A6NHG4	DDTL_HUMAN	87	75	A6NHG4	Phyre	87:A	620	15.13	Intra	1	1	2	25854	5
AYFKR	3	P46777	RL5_HUMAN	14	10	P46777	Phyre	14:A	47	RAYFKR	4	A7XYQ1	SOBP_HUMAN	188	183	####		####	####	####	2	2	1	1	15876	4
DFLLKPELLR	4	O00148	DX39A_HUMAN	52	47	O00148	Phyre	52:A	63	DIKGSYVSIHSSGFR	2	O00148	DX39A_HUMAN	35	32	####		####	####	####	Intra	3	1	10	27595	5
DFLLKPELLR	4	O00148	DX39A_HUMAN	52	47	O00148	Phyre	52:A	63	ELAFQISKEYER	7	O00148	DX39A_HUMAN	130	122	O00148	Phyre	130:A	655	19.76	Intra	1	1	10	31599	4
DFLLKPELLR	4	O00148	DX39A_HUMAN	52	47	O00148	Phyre	52:A	63	FGTKGLAITFVSDENDAK	3	O00148	DX39A_HUMAN	383	379	O00148	Phyre	383:A	2743	42.12	Intra	4	1	10	34088	4
DFLLKPELLR	4	O00148	DX39A_HUMAN	52	47	O00148	Phyre	52:A	63	KFMQDPMEVFVDDETK	0	O00148	DX39A_HUMAN	240	239	O00148	Phyre	240:A	1554	32.02	Intra	1	1	10	36377	4
DFLLKPELLR	4	O00148	DX39A_HUMAN	52	47	O00148	Phyre	52:A	63	KNCPHVVVGTPGR	0	O00148	DX39A_HUMAN	162	161	O00148	Phyre	162:A	920	29.15	Intra	1	1	10	23778	5
DFLLKPELLR	4	O00148	DX39A_HUMAN	52	47	O00148	Phyre	52:A	63	LTPHEKQCMMFSATLSK	5	O00148	DX39A_HUMAN	221	215	O00148	Phyre	221:A	1404	20.97	Intra	1	1	10	28237	4
DFLLKPELLR	4	O00148	DX39A_HUMAN	52	47	O00148	Phyre	52:A	63	YQQFKDFQR	4	O00148	DX39A_HUMAN	333	328	O00148	Phyre	333:A	2331	29.23	Intra	4	1	10	28677	4
FSKYMPSVK	2	O00148	DX39A_HUMAN	137	134	O00148	Phyre	137:A	722	DFLLKPELLR	4	O00148	DX39A_HUMAN	52	47	O00148	Phyre	52:A	63	12.61	Intra	5	1	10	29190	4
FSKYM[147.04]PSVK	2	O00148	DX39A_HUMAN	137	134	O00148	Phyre	137:A	722	DFLLKPELLR	4	O00148	DX39A_HUMAN	52	47	O00148	Phyre	52:A	63	12.61	Intra	1	1	10	27691	4
SFSLKNVK	4	O00148	DX39A_HUMAN	187	182	O00148	Phyre	187:A	1111	DFLLKPELLR	4	O00148	DX39A_HUMAN	52	47	O00148	Phyre	52:A	63	26.38	Intra	4	1	10	29669	4
KGCVITISGR	0	O00154	BACH_HUMAN	286	285	2QQ2	Structure	276:K	12158	KGCVITISGR	0	O00154	BACH_HUMAN	286	285	2QQ2	Structure	276:E	5278	17.28	1	5	1	1	18156	4
NMVWKYCR	4	O00159	MYO1C_HUMAN	858	853	####		####	####	SISPEWKQQLQQK	6	O00159	MYO1C_HUMAN	868	861	####		####	####	####	Intra	5	1	5	20369	4
NM[147.04]VWKYCR	4	O00159	MYO1C_HUMAN	858	853	####		####	####	SISPEWKQQLQQK	6	O00159	MYO1C_HUMAN	868	861	####		####	####	####	Intra	6	1	5	18904	4
TEATKR	4	O00159	MYO1C_HUMAN	151	146	4BYF	Structure	116:C	7743	SDWKVVR	3	O00159	MYO1C_HUMAN	285	281	4BYF	Structure	250:C	8825	18.89	Intra	5	1	5	12981	4
TFTWLVGKINR	7	O00159	MYO1C_HUMAN	396	388	4BYF	Structure	361:A	2782	SLASKDVESPSWR	4	O00159	MYO1C_HUMAN	404	399	4BYF	Structure	369:A	2843	14.66	Intra	3	1	5	25888	4
TKIFIR	1	O00159	MYO1C_HUMAN	714	712	4BYF	Structure	679:A	5344	KYEAFLQR	0	O00159	MYO1C_HUMAN	667	666	4BYF	Structure	632:A	4952	4.15	Intra	4	1	5	20444	4
NVASKNIEIK	4	O00203	AP3B1_HUMAN	90	85	O00203	Modeller	90:A	657	KLVYVYLVR	0	O00203	AP3B1_HUMAN	96	95	O00203	Modeller	96:A	708	10.4	Intra	1	0.97	1	24656	4
EASIDILHSIVKR	11	O00231	PSD11_HUMAN	32	20	5M32	Structure	32:l	67658	TGQAAELGGLLKYVRPFLNSISK	11	O00231	PSD11_HUMAN	71	59	5M32	Structure	71:l	67814	6.6	Intra	7	1	1	39010	5
WKDLK	1	O00232	PSD12_HUMAN	352	350	O00231_O00232	Docking	352:B	18027	VQIEHISSLIKLSK	10	O00231	PSD11_HUMAN	355	344	O00231_O00232	Docking	355:A	69734	20.91	1	6	1	1	21941	5
IMAKYYTR	3	O00232	PSD12_HUMAN	368	364	5VGZ	Structure	368:W	18161	LAGIINFQRPKDPNNLLNDWSQK	10	O00232	PSD12_HUMAN	419	408	5VGZ	Structure	419:W	18576	18.27	Intra	2	1	2	25391	5
IMAKYYTR	3	O00232	PSD12_HUMAN	368	364	5VGZ	Structure	368:W	18161	LNSLMSLVNKTTHLIAK	9	O00232	PSD12_HUMAN	441	431	5VGZ	Structure	441:W	18753	29.53	Intra	1	1	2	30482	4
IMAKYYTR	3	O00232	PSD12_HUMAN	368	364	O00232_P51665	Docking	368:A	18161	VVGVLLGSWQKK	10	P51665	PSMD7_HUMAN	45	34	O00232_P51665	Docking	45:B	350	14.61	1	1	0.8	1	22884	4
IMAKYYTR	3	O00232	PSD12_HUMAN	368	364	O00232_Q9UNM6	Docking	368:A	18161	YYQTIGNHASYYKDALR	12	Q9UNM6	PSD13_HUMAN	174	161	O00232_Q9UNM6	Docking	174:B	####	####	1	2	1	1	17749	5
VFDVTKGR	5	O00264	PGRC1_HUMAN	102	96	4X8Y	Structure	102:A	283	KFYGPEGPYGVFAGR	0	O00264	PGRC1_HUMAN	105	104	4X8Y	Structure	105:A	307	7.97	Intra	2	1	1	22967	4
MSIKAYVSTLMGVPGR	3	O00303	EIF3F_HUMAN	214	210	O00303_O15372	Docking	214:A	1013	KSAVADKHELLSLASSNHLGK	0	O15372	EIF3H_HUMAN	221	220	O00303_O15372	Docking	221:B	1552	14.09	1	2	1	1	26689	6
KWISDWNLTTEK	0	Q7L2H7	EIF3M_HUMAN	149	148	O00303_Q7L2H7	Docking	149:B	1119	MSIKAYVSTLMGVPGR	3	O00303	EIF3F_HUMAN	214	210	O00303_Q7L2H7	Docking	214:A	1013	36.6	1	1	0.95	1	35848	4
FLKSFK	2	O00330	ODPX_HUMAN	488	485	O00330_P10515	Docking	488:A	1694	SKISVNDFIIK	1	P10515	ODP2_HUMAN	473	471	O00330_P10515	Docking	473:B	1151	19.91	1	2	0.88	1	25010	4
IGKSILGK	2	O00418	EF2K_HUMAN	520	517	####		####	####	VCVEKWNLLNSSR	4	O00418	EF2K_HUMAN	485	480	####		####	####	####	Intra	1	0.91	1	23516	4
VELPTKR	5	O00423	EMAL1_HUMAN	219	213	4CI8	Structure	219:A	337	LKLEWVYGYR	1	O95834	EMAL2_HUMAN	56	54	4CGB	Structure	####	####	####	2	1	0.97	1	24272	4
GCVTKIYGR	4	O00442	RTCA_HUMAN	191	186	O00442	Phyre	191:A	1474	FGFIFNCDIKTR	9	O00442	RTCA_HUMAN	156	146	O00442	Phyre	156:A	1199	26.88	Intra	3	1	1	24473	4
MLLNLHKK	6	O00487	PSDE_HUMAN	222	215	O00487_P51665	Docking	222:A	28253	DIKDTTVGTLSQR	2	P51665	PSMD7_HUMAN	180	177	O00487_P51665	Docking	180:B	1436	21.99	1	2	0.8	1	19225	4
TFYLIKDIR	5	O00541	PESC_HUMAN	68	62	O00541	Modeller	68:A	548	FLLHEPIVNKFR	9	O00541	PESC_HUMAN	81	71	O00541	Modeller	81:A	660	27.23	Intra	3	1	1	26939	5
VLKGHVLTR	2	Q14137	BOP1_HUMAN	711	708	O00541_Q14137	Docking	711:B	4805	LAQEEESEAKR	9	O00541	PESC_HUMAN	533	523	O00541_Q14137	Docking	533:A	4313	51.92	1	1	0.89	1	11357	5
GKIGLDFCK	1	O00571	DDX3X_HUMAN	335	333	5E7I	Structure	335:B	1433	KQYPISLVLAPTR	0	O00571	DDX3X_HUMAN	264	263	5E7I	Structure	264:B	868	4.32	Intra	2	1	3	28226	4
HTMMFSATFPKEIQMLAR	10	O00571	DDX3X_HUMAN	387	376	5E7I	Structure	387:B	1855	GLDISNVKHVINFDLPSDIEEYVHR	7	O00571	DDX3X_HUMAN	511	503	5E7I	Structure	511:B	2762	25.56	Intra	5	1	3	35613	5
SGKSPILVATAVAAR	2	O00571	DDX3X_HUMAN	491	488	5E7I	Structure	491:C	9401	GLDISNVKHVINFDLPSDIEEYVHR	7	O00571	DDX3X_HUMAN	511	503	5E7I	Structure	511:C	9540	15.22	Intra	5	1	3	34018	6
AKTWK	1	O00625	PIR_HUMAN	282	280	4EWE	Structure	282:A	2186	NAKNGFER	2	O00625	PIR_HUMAN	275	272	4EWE	Structure	275:A	2129	8.74	Intra	2	1	1	11732	4
ALSTGEKGFGYK	6	P62937	PPIA_HUMAN	44	37	4N1M	Structure	44:A	633	ARSHSFSTHSGDKPSTPPIEGSGK	12	O14513	NCKP5_HUMAN	1285	1272	O14513	Phyre	1285:A	####	####	2	2	0.8	1	21416	5
VKLSSPER	1	O14579	COPE_HUMAN	42	40	O14579	Phyre	42:A	209	KFGVVLDEIKPSSAPELQAVR	0	O14579	COPE_HUMAN	65	64	O14579	Phyre	65:A	407	23.43	Intra	1	1	1	22744	5
YIASLKQR	5	O14818	PSA7_HUMAN	115	109	5LE5	Structure	115:Q	28881	LYQTDPSGTYHAWKANAIGR	13	O14818	PSA7_HUMAN	157	143	5LE5	Structure	157:Q	29222	22.73	Intra	2	1	1	19044	5
TFTLKLTEPR	4	O14908	GIPC1_HUMAN	210	205	O14908	Phyre	210:A	1260	IEGFTNVKELYGK	7	O14908	GIPC1_HUMAN	80	72	O14908	Phyre	80:A	240	58.32	Intra	1	1	1	27074	4
KDDVSIYYVSR	0	O14975	S27A2_HUMAN	174	173	####		####	####	AKSLLHCFQCCGAK	1	O14975	S27A2_HUMAN	141	139	O14975	Phyre	141:A	1087	####	Intra	2	1	1	19534	5
KDLTEYLSR	0	O14979	HNRDL_HUMAN	162	161	O14979	Phyre	162:A	180	GFGFVLFKDAASVDK	7	O14979	HNRDL_HUMAN	197	189	O14979	Phyre	197:A	464	18.33	Intra	3	1	1	31753	4
ACKAVGHPFVIQLGR	2	O14980	XPO1_HUMAN	700	697	O14980	Unknown	700:A	4776	EFMKDTDSINLYK	3	O14980	XPO1_HUMAN	446	442	####		####	####	####	Intra	3	1	6	23618	5
DTDSINLYKNMR	8	O14980	XPO1_HUMAN	455	446	3GB8	Structure	455:A	2778	ACKAVGHPFVIQLGR	2	O14980	XPO1_HUMAN	700	697	3GB8	Structure	700:A	4776	28.49	Intra	3	1	6	23027	4
IAQKCR	3	O14980	XPO1_HUMAN	594	590	3GB8	Structure	594:A	3922	ACKAVGHPFVIQLGR	2	O14980	XPO1_HUMAN	700	697	3GB8	Structure	700:A	4776	16.01	Intra	2	1	6	17420	5
IAQKCR	3	O14980	XPO1_HUMAN	594	590	3GB8	Structure	594:A	3922	ETLKLISGWVSR	3	O14980	XPO1_HUMAN	757	753	3GB8	Structure	757:A	5225	25.59	Intra	1	1	6	22249	4
WKILPR	1	O14980	XPO1_HUMAN	92	90	####		####	####	YYGLQILENVIKTR	11	O14980	XPO1_HUMAN	88	76	O14980	Unknown	88:A	195	####	Intra	1	1	6	33526	4
YYGLQILENVIKTR	11	O14980	XPO1_HUMAN	88	76	3GB8	Structure	88:A	195	MAQEVLTHLKEHPDAWTR	9	O14980	XPO1_HUMAN	54	44	3GB8	Structure	54:A	7	18.1	Intra	1	1	6	29260	5
KSGQCSGCGK	0	O15091	MRPP3_HUMAN	344	343	4XGL	Structure	344:A	1144	FPGSKLTFQR	4	O15091	MRPP3_HUMAN	536	531	4XGL	Structure	536:A	2423	25.21	Intra	9	1	1	15541	4
NAYVWTLKGR	7	O15143	ARC1B_HUMAN	82	74	O15143	Phyre	82:A	652	TWKPTLVILR	2	O15143	ARC1B_HUMAN	87	84	O15143	Phyre	87:A	697	7.05	Intra	7	1	2	28834	4
TWKPTLVILR	2	O15143	ARC1B_HUMAN	87	84	O15143	Phyre	87:A	697	VHELKEHNGQVTGIDWAPESNR	4	O15143	ARC1B_HUMAN	49	44	O15143	Phyre	49:A	390	9.48	Intra	2	1	2	23365	5
TITGKTFSSR	4	O15144	ARPC2_HUMAN	295	290	O15143_O15144	Docking	295:B	2372	TWKPTLVILR	2	O15143	ARC1B_HUMAN	87	84	O15143_O15144	Docking	87:A	697	17.61	1	2	1	1	25176	4
TWKPTLVILR	2	O15143	ARC1B_HUMAN	87	84	O15143_P61160	Docking	87:A	697	EKLCYVGYNIEQEQK	1	P61160	ARP2_HUMAN	219	217	O15143_P61160	Docking	219:B	1652	42.64	1	2	1	2	28208	4
TWKPTLVILR	2	O15143	ARC1B_HUMAN	87	84	O15143_P61160	Docking	87:A	697	KVVVCDNGTGFVK	0	P61160	ARP2_HUMAN	7	6	O15143_P61160	Docking	7:B	26	18.65	1	5	1	2	27615	4
KLQKCNSK	3	O15145	ARPC3_HUMAN	84	80	O15145	Phyre	84:A	672	WWTCFVKR	6	O15145	ARPC3_HUMAN	165	158	O15145	Phyre	165:A	1328	13.58	Intra	1	1	3	17125	5
LQKCNSK	2	O15145	ARPC3_HUMAN	84	81	O15145	Phyre	84:A	672	WWTCFVKR	6	O15145	ARPC3_HUMAN	165	158	O15145	Phyre	165:A	1328	13.58	Intra	5	1	3	19143	4
WWTCFVKR	6	O15145	ARPC3_HUMAN	165	158	O15145	Phyre	165:A	1328	VFDPQNDKPSK	7	O15145	ARPC3_HUMAN	155	147	O15145	Phyre	155:A	1238	18.24	Intra	7	1	3	21223	4
WWTCFVKR	6	O15145	ARPC3_HUMAN	165	158	O15145_P61158	Docking	165:A	1328	KEFSIDVGYER	0	P61158	ARP3_HUMAN	265	264	O15145_P61158	Docking	265:B	1988	28.47	1	4	1	1	25394	4
EKYDYVGR	1	O15173	PGRC2_HUMAN	193	191	O15173	Phyre	193:A	758	GSKFYGPAGPYGIFAGR	2	O15173	PGRC2_HUMAN	135	132	O15173	Phyre	135:A	293	14.44	Intra	3	1	1	24910	4
SLKSQVAEAK	2	O15320	CTGE5_HUMAN	184	181	O15320	Phyre	184:A	840	MTFKIFQMNEER	3	O15320	CTGE5_HUMAN	195	191	O15320	Phyre	195:A	925	17.64	Intra	6	1	1	23329	4
MGKER	2	O15371	EIF3D_HUMAN	332	329	O15371	Phyre	332:A	1383	SEKPLR	2	O15371	EIF3D_HUMAN	215	212	O15371	Phyre	215:A	454	20.93	Intra	1	0.97	3	9562	4
VGSKLFFDKR	3	O15371	EIF3D_HUMAN	275	271	O15371	Phyre	275:A	924	LEEGKYLILK	4	O15371	EIF3D_HUMAN	505	500	O15371	Phyre	505:A	2741	11.88	Intra	4	1	3	22611	5
VGSKLFFDKR	3	O15371	EIF3D_HUMAN	275	271	O15371	Phyre	275:A	924	WKLGDDIDLIVR	1	O15371	EIF3D_HUMAN	364	362	O15371	Phyre	364:A	1658	14.36	Intra	1	1	3	28510	4
VLMKLQEQQK	3	O15381	NVL_HUMAN	492	488	####		####	####	EVCKMLIHMR	3	O15381	NVL_HUMAN	279	275	####		####	####	####	Intra	1	0.91	1	19513	5
IIAKLQSK	3	O43143	DHX15_HUMAN	786	782	5XDR	Structure	786:A	5398	KALVTGYFMQVAHLER	0	O43143	DHX15_HUMAN	691	690	5XDR	Structure	691:A	4608	20.11	Intra	13	1	2	25126	5
TCTDIKPEWLVK	5	O43143	DHX15_HUMAN	754	748	5XDR	Structure	754:A	5128	KALVTGYFMQVAHLER	0	O43143	DHX15_HUMAN	691	690	5XDR	Structure	691:A	4608	8.64	Intra	2	1	2	28445	4
AVTKLGFK	3	O43159	RRP8_HUMAN	409	405	2ZFU	Structure	409:A	1305	IVSKDLTNSHFFLFDFQK	3	O43159	RRP8_HUMAN	417	413	2ZFU	Structure	417:A	1367	17.19	Intra	2	1	1	29000	5
LEEVAKR	5	O43169	CYB5B_HUMAN	30	24	3NER	Structure	14:B	892	NSLKELWLVIHGR	3	O43169	CYB5B_HUMAN	35	31	3NER	Structure	19:B	934	10.74	Intra	10	1	1	26683	4
EASKQADVNLVNAK	3	O43175	SERA_HUMAN	384	380	O43175	Phyre	384:A	2786	SLTGVVNAQALTSAFSPHTKPWIGLAEALGTLMR	19	O43175	SERA_HUMAN	330	310	O43175	Phyre	330:A	2400	21.02	Intra	1	1	1	43409	5
KAPQHTAVGFK	0	O43242	PSMD3_HUMAN	315	314	O43242	Phyre	315:A	2076	IKAIQLEYSEAR	1	O43242	PSMD3_HUMAN	296	294	O43242	Phyre	296:A	1920	19.12	Intra	1	1	2	16774	5
KAPQHTAVGFK	0	O43242	PSMD3_HUMAN	315	314	5M32	Structure	166:j	65002	ISFCLDIHNMSVKAMR	12	O43242	PSMD3_HUMAN	492	479	5M32	Structure	343:j	65667	21.76	Intra	6	1	2	21959	5
KDWLFAPHYR	0	Q15008	PSMD6_HUMAN	284	283	5M32	Structure	####	####	TGNLAKFNQVLDQFGEK	5	O43242	PSMD3_HUMAN	374	368	5M32	Structure	####	####	####	1	1	0.97	1	28823	5
EKQGSK	1	O43390	HNRPR_HUMAN	110	108	####		####	####	LCDSYEIRPGKHLGVCISVANNR	10	O43390	HNRPR_HUMAN	235	224	O43390	Phyre	235:A	559	####	Intra	1	1	3	15900	5
LCDSYEIRPGKHLGVCISVANNR	10	O43390	HNRPR_HUMAN	235	224	O43390	Phyre	235:A	559	KYGGPPPDSVYSGVQPGIGTEVFVGKIPR	25	O43390	HNRPR_HUMAN	171	145	O43390	Phyre	171:A	79	6.46	Intra	2	1	3	23517	5
VQESTKGPDEAK	5	O43390	HNRPR_HUMAN	120	114	####		####	####	LCDSYEIRPGKHLGVCISVANNR	10	O43390	HNRPR_HUMAN	235	224	O43390	Phyre	235:A	559	####	Intra	3	1	3	16496	5
LLEQKTQESQK	4	O43670	ZN207_HUMAN	100	95	####		####	####	KQLKPWCWYCNR	0	O43670	ZN207_HUMAN	7	6	####		####	####	####	Intra	3	1	1	17956	5
LIQELAKCK	6	O43681	ASNA_HUMAN	267	260	O43681	Phyre	267:A	1643	WIFVGGKGGVGK	6	O43681	ASNA_HUMAN	45	38	O43681	Phyre	45:A	67	20.13	Intra	2	1	1	21932	4
YAFKCHR	3	O43684	BUB3_HUMAN	222	218	O43684	Phyre	222:A	1736	ESSLKYQTR	4	O43684	BUB3_HUMAN	179	174	O43684	Phyre	179:A	1383	12.75	Intra	2	1	2	11706	5
YAFKCHR	3	O43684	BUB3_HUMAN	222	218	O43684	Phyre	222:A	1736	KYAFKCHR	4	O43684	BUB3_HUMAN	222	217	O43684	Phyre	222:A	1736	0	N/A	3	1	2	11820	5
IKIIAPPER	1	P68032	ACTC_HUMAN	330	328	O43707_P68032	Docking	330:B	2546	VHKINNVNK	2	O43707	ACTN4_HUMAN	108	105	O43707_P68032	Docking	108:A	537	15.56	1	5	1	1	14224	4
VKVFGWVHR	1	O43776	SYNC_HUMAN	129	127	O43776	Modeller	129:A	1032	ITIKNDPSLPEPK	3	O43776	SYNC_HUMAN	104	100	O43776	Modeller	104:A	840	17.88	Intra	3	1	1	21232	5
GVTQFGNKYIQQTKPLTLER	7	O43809	CPSF5_HUMAN	23	15	3BAP	Structure	####	####	GVTQFGNKYIQQTKPLTLER	7	O43809	CPSF5_HUMAN	23	15	3BAP	Structure	####	####	####	1	1	1	1	21859	6
KLDLFANVVHVK	0	O43837	IDH3B_HUMAN	135	134	O43837_P51553	Docking	135:A	1020	ANIMKLGDGLFLQCCR	4	P51553	IDH3G_HUMAN	226	221	O43837_P51553	Docking	226:B	1652	56.55	1	5	1	1	31693	5
TKQTLGYHVYPTCR	1	O43847	NRDC_HUMAN	954	952	O43847	Phyre	954:A	6352	FFWGNAETLKHEPR	9	O43847	NRDC_HUMAN	351	341	O43847	Phyre	351:A	1393	18.42	Intra	1	1	1	19258	5
FAQKR	3	O43852	CALU_HUMAN	102	98	O43852	Phyre	102:A	307	LGKIVSK	2	O43852	CALU_HUMAN	75	72	O43852	Phyre	75:A	89	22.15	Intra	3	1	1	11995	4
LGSKIR	3	O60231	DHX16_HUMAN	638	634	O60231	Phyre	638:A	1930	VAAGKCFR	4	O60231	DHX16_HUMAN	733	728	O60231	Phyre	733:A	2643	23.98	Intra	1	0.97	1	12833	4
DFNQFIKANEK	6	O60264	SMCA5_HUMAN	855	848	####		####	####	LLTQGFTNWNKR	10	O60264	SMCA5_HUMAN	847	836	####		####	####	####	Intra	2	1	4	23925	4
KANYAVDAYFR	0	O60264	SMCA5_HUMAN	739	738	O60264	Phyre	739:A	4116	LLTQGFTNWNKR	10	O60264	SMCA5_HUMAN	847	836	####		####	####	####	Intra	1	1	4	23447	4
KFNWR	0	O60264	SMCA5_HUMAN	299	298	O60264	Phyre	299:A	1131	EFKTTNR	2	O60264	SMCA5_HUMAN	328	325	O60264	Phyre	328:A	1389	9.31	Intra	2	1	4	15135	4
KFNWR	0	O60264	SMCA5_HUMAN	299	298	O60264	Phyre	299:A	1131	SVCLIGDKEQR	7	O60264	SMCA5_HUMAN	264	256	O60264	Phyre	264:A	843	18.89	Intra	4	1	4	18852	4
ELDRNELFEKAK	9	O60313	OPA1_HUMAN	596	586	####		####	####	FNLETEWKNNYPR	7	O60313	OPA1_HUMAN	579	571	O60313	Phyre	579:A	2572	####	Intra	1	0.94	1	22259	4
EKQGTK	1	O60506	HNRPQ_HUMAN	107	105	####		####	####	SGKHIGVCISVANNR	2	O60506	HNRPQ_HUMAN	232	229	O60506	Phyre	232:A	567	####	Intra	8	1	6	13083	5
LMSGKVK	4	O60506	HNRPQ_HUMAN	310	305	O60506	Phyre	310:A	1173	SGKHIGVCISVANNR	2	O60506	HNRPQ_HUMAN	232	229	O60506	Phyre	232:A	567	40.97	Intra	2	1	6	15451	5
SAFLCGVMKTYR	8	O60506	HNRPQ_HUMAN	100	91	####		####	####	SGKHIGVCISVANNR	2	O60506	HNRPQ_HUMAN	232	229	O60506	Phyre	232:A	567	####	Intra	3	1	6	21055	5
SGKHIGVCISVANNR	2	O60506	HNRPQ_HUMAN	232	229	O60506	Phyre	232:A	567	GFCFLEYEDHKTAAQAR	10	O60506	HNRPQ_HUMAN	297	286	O60506	Phyre	297:A	1074	23.44	Intra	5	1	6	19648	6
SGKHIGVCISVANNR	2	O60506	HNRPQ_HUMAN	232	229	O60506	Phyre	232:A	567	KYGGPPPDSVYSGQQPSVGTEIFVGKIPR	25	O60506	HNRPQ_HUMAN	168	142	O60506	Phyre	168:A	81	6.46	Intra	2	1	6	21835	4
VADSSKGPDEAK	5	O60506	HNRPQ_HUMAN	117	111	####		####	####	SGKHIGVCISVANNR	2	O60506	HNRPQ_HUMAN	232	229	O60506	Phyre	232:A	567	####	Intra	8	1	6	13841	5
SGKHIGVCISVANNR	2	O60506	HNRPQ_HUMAN	232	229	2NBB	Structure	####	####	GLKYNQATQTFHQWR	2	Q8N8S7	ENAH_HUMAN	69	66	2XQN	Structure	69:M	711	####	2	1	0.73	1	24095	4
KLDSELTAR	0	O60610	DIAP1_HUMAN	487	486	####		####	####	DSKAEPHFLSILQHLLLVR	2	O60610	DIAP1_HUMAN	405	402	O60610	Phyre	405:A	2396	####	Intra	2	1	1	37723	5
ISLLKPSTK	4	O60671	RAD1_HUMAN	229	224	3G65	Structure	229:B	3642	NLSTILKAIHFR	6	O60671	RAD1_HUMAN	32	25	3G65	Structure	32:B	2092	13.98	Intra	3	1	1	28547	4
AVTKYTSAK	3	O60814	H2B1K_HUMAN	121	117	2CV5	Structure	117:H	12000	KESYSVYVYKVLK	9	O60814	H2B1K_HUMAN	44	34	2CV5	Structure	40:H	11412	19.74	Intra	3	1	9	19212	4
AVTKYTSAK	3	O60814	H2B1K_HUMAN	121	117	2CV5	Structure	117:D	8947	LLLPGELAKHAVSEGTK	8	O60814	H2B1K_HUMAN	109	100	2CV5	Structure	105:D	8862	18.13	Intra	4	1	9	20122	5
AVTKYTSAK	3	O60814	H2B1K_HUMAN	121	117	2CV5	Structure	117:H	12000	VLKQVHPDTGISSK	2	O60814	H2B1K_HUMAN	47	44	2CV5	Structure	43:H	11436	22.3	Intra	2	1	9	12005	5
HAVSEGTKAVTK	7	O60814	H2B1K_HUMAN	117	109	2CV5	Structure	113:H	11972	ESYSVYVYKVLK	8	O60814	H2B1K_HUMAN	44	35	2CV5	Structure	40:H	11412	19.52	Intra	4	1	9	19830	5
HAVSEGTKAVTK	7	O60814	H2B1K_HUMAN	117	109	2CV5	Structure	113:H	11972	KESYSVYVYKVLK	9	O60814	H2B1K_HUMAN	44	34	2CV5	Structure	40:H	11412	19.52	Intra	2	1	9	17302	5
KESYSVYVYK	0	O60814	H2B1K_HUMAN	35	34	2CV5	Structure	31:D	8279	VLKQVHPDTGISSK	2	O60814	H2B1K_HUMAN	47	44	2CV5	Structure	43:D	8383	23.2	Intra	4	1	9	15671	5
LAHYNKR	5	O60814	H2B1K_HUMAN	86	80	2CV5	Structure	82:H	11737	KESYSVYVYK	0	O60814	H2B1K_HUMAN	35	34	2CV5	Structure	31:H	11332	34.35	Intra	7	1	9	12979	5
LAHYNKR	5	O60814	H2B1K_HUMAN	86	80	2CV5	Structure	82:H	11737	KESYSVYVYKVLK	9	O60814	H2B1K_HUMAN	44	34	2CV5	Structure	40:H	11412	38.42	Intra	2	1	9	17143	5
SAPAPKK	5	O60814	H2B1K_HUMAN	12	6	####		####	####	KAVTKAQK	4	O60814	H2B1K_HUMAN	21	16	####		####	####	####	Intra	4	1	9	5360	4
KGNYSER	0	P04908	H2A1B_HUMAN	37	36	5B0Z	Structure	36:C	1614	KESYSVYVYKVLK	9	O60814	H2B1K_HUMAN	44	34	2CV5	Structure	40:D	8359	####	1	2	0.8	2	18657	4
KGNYSER	0	P04908	H2A1B_HUMAN	37	36	5B0Z	Structure	36:C	1614	LAHYNKR	5	O60814	H2B1K_HUMAN	86	80	2CV5	Structure	82:D	8684	####	1	1	0.8	2	6929	5
GVLKVFLENVIR	3	P62805	H4_HUMAN	60	56	5B0Z	Structure	59:B	1059	LLLPGELAKHAVSEGTK	8	O60814	H2B1K_HUMAN	109	100	2CV5	Structure	105:D	8862	####	1	12	1	4	34963	4
HAVSEGTKAVTK	7	O60814	H2B1K_HUMAN	117	109	2CV5	Structure	113:D	8919	DAVTYTEHAKR	9	P62805	H4_HUMAN	78	68	5B0Z	Structure	77:B	1207	####	1	1	1	4	8918	5
KESYSVYVYK	0	O60814	H2B1K_HUMAN	35	34	2CV5	Structure	31:D	8279	DAVTYTEHAKR	9	P62805	H4_HUMAN	78	68	5B0Z	Structure	77:B	1207	####	1	1	1	4	14519	4
LAHYNKR	5	O60814	H2B1K_HUMAN	86	80	2CV5	Structure	82:D	8684	DAVTYTEHAKR	9	P62805	H4_HUMAN	78	68	5B0Z	Structure	77:B	1207	####	1	8	1	4	8811	5
AHVKHR	3	P62917	RL8_HUMAN	21	17	P62917	Phyre	21:A	146	LAHYNKR	5	O60814	H2B1K_HUMAN	86	80	####		####	####	####	2	1	0.8	1	5938	6
EIAQDFKTDLR	6	P68431	H31_HUMAN	80	73	O60814_P68431	Docking	80:B	377	LLLPGELAKHAVSEGTK	8	O60814	H2B1K_HUMAN	109	100	O60814_P68431	Docking	109:A	8893	11.65	1	3	1	8	24142	4
HAVSEGTKAVTK	7	O60814	H2B1K_HUMAN	117	109	O60814_P68431	Docking	117:A	8947	EIAQDFKTDLR	6	P68431	H31_HUMAN	80	73	O60814_P68431	Docking	80:B	377	16.28	1	4	1	8	15558	4
KLPFQR	0	P68431	H31_HUMAN	65	64	O60814_P68431	Docking	65:B	246	KESYSVYVYK	0	O60814	H2B1K_HUMAN	35	34	O60814_P68431	Docking	35:A	8315	22.54	1	4	1	8	18893	4
LAHYNKR	5	O60814	H2B1K_HUMAN	86	80	O60814_P68431	Docking	86:A	8717	YQKSTELLIR	2	P68431	H31_HUMAN	57	54	O60814_P68431	Docking	57:B	180	19.01	1	3	1	8	14773	5
TKQTAR	1	P68431	H31_HUMAN	5	3	O60814_P68431	Docking	5:B	####	AVTKYTSAK	3	O60814	H2B1K_HUMAN	121	117	O60814_P68431	Docking	121:A	8981	####	1	1	1	8	8109	4
TKQTAR	1	P68431	H31_HUMAN	5	3	O60814_P68431	Docking	5:B	####	HAVSEGTKAVTK	7	O60814	H2B1K_HUMAN	117	109	O60814_P68431	Docking	117:A	8947	####	1	6	1	8	6375	4
TKQTAR	1	P68431	H31_HUMAN	5	3	O60814_P68431	Docking	5:B	####	LLLPGELAKHAVSEGTK	8	O60814	H2B1K_HUMAN	109	100	O60814_P68431	Docking	109:A	8893	####	1	1	1	8	18925	5
TKQTAR	1	P68431	H31_HUMAN	5	3	O60814_P68431	Docking	5:B	####	VLKQVHPDTGISSK	2	O60814	H2B1K_HUMAN	47	44	O60814_P68431	Docking	47:A	8418	####	1	2	1	8	10002	5
AVTKYTSAK	3	O60814	H2B1K_HUMAN	121	117	2CV5	Structure	117:D	8947	KESYSIYVYKVLK	9	Q16778	H2B2E_HUMAN	44	34	4NFT	Structure	12:A	102	####	1	4	1	3	19975	4
AVTKYTSSK	3	Q16778	H2B2E_HUMAN	121	117	4NFT	Structure	89:A	697	ESYSVYVYKVLK	8	O60814	H2B1K_HUMAN	44	35	2CV5	Structure	40:D	8359	####	1	1	1	3	22996	4
AVTKYTSSK	3	Q16778	H2B2E_HUMAN	121	117	4NFT	Structure	89:A	697	KESYSVYVYKVLK	9	O60814	H2B1K_HUMAN	44	34	2CV5	Structure	40:D	8359	####	1	10	1	3	19070	5
KGNYAER	0	Q96KK5	H2A1H_HUMAN	37	36	O60814_Q96KK5	Docking	37:B	268	KESYSVYVYKVLK	9	O60814	H2B1K_HUMAN	44	34	O60814_Q96KK5	Docking	44:A	8392	31.3	1	13	1	4	18815	5
KGNYAER	0	Q96KK5	H2A1H_HUMAN	37	36	O60814_Q96KK5	Docking	37:B	268	LAHYNKR	5	O60814	H2B1K_HUMAN	86	80	O60814_Q96KK5	Docking	86:A	8717	12.8	1	12	1	4	7166	4
KGNYAER	0	Q96KK5	H2A1H_HUMAN	37	36	O60814_Q96KK5	Docking	37:B	268	SRKESYSVYVYK	2	O60814	H2B1K_HUMAN	35	32	O60814_Q96KK5	Docking	35:A	8315	21.3	1	2	1	4	12213	5
NDEELNKLLGK	6	Q96KK5	H2A1H_HUMAN	96	89	O60814_Q96KK5	Docking	96:B	726	LLLPGELAKHAVSEGTK	8	O60814	H2B1K_HUMAN	109	100	O60814_Q96KK5	Docking	109:A	8893	19.83	1	2	1	4	25631	5
LVKSQQSAGK	2	O60832	DKC1_HUMAN	144	141	O60832	Phyre	144:A	764	ALETLTGALFQRPPLIAAVKR	19	O60832	DKC1_HUMAN	191	171	O60832	Phyre	191:A	1115	19.54	Intra	1	1	1	27257	5
EQIGKVDEIFGQLR	4	Q9NY12	GAR1_HUMAN	112	107	O60832_Q9NY12	Docking	112:B	353	ALETLTGALFQRPPLIAAVKR	19	O60832	DKC1_HUMAN	191	171	O60832_Q9NY12	Docking	191:A	1115	20.29	1	4	1	2	34749	4
FYIDPYKLLPLQR	6	Q9NY12	GAR1_HUMAN	150	143	O60832_Q9NY12	Docking	150:B	679	ALETLTGALFQRPPLIAAVKR	19	O60832	DKC1_HUMAN	191	171	O60832_Q9NY12	Docking	191:A	1115	17.62	1	5	1	2	39019	5
GNNFLYTNGKCVILR	9	O75083	WDR1_HUMAN	38	28	O75083	Modeller	38:A	288	YAPSGFYIASGDVSGKLR	15	O75083	WDR1_HUMAN	81	65	O75083	Modeller	81:A	612	28.48	Intra	1	1	2	27707	4
YEYQPFAGKIK	8	O75083	WDR1_HUMAN	104	95	O75083	Modeller	104:A	815	GNNFLYTNGKCVILR	9	O75083	WDR1_HUMAN	38	28	O75083	Modeller	38:A	288	30.45	Intra	1	1	2	25748	4
ENSTAKFIPR	5	O75369	FLNB_HUMAN	1005	999	####		####	####	KVVPCLVTPVTGR	0	O75369	FLNB_HUMAN	987	986	####		####	####	####	Intra	1	0.95	2	23450	4
IKVFGPGIEGK	1	O75369	FLNB_HUMAN	1232	1230	####		####	####	VKVEPAVDTSR	1	O75369	FLNB_HUMAN	1221	1219	####		####	####	####	Intra	1	1	2	20235	4
KLNEQSPTR	0	O75396	SC22B_HUMAN	43	42	O75396	Phyre	43:A	323	DLQQYQSQAKQLFR	9	O75396	SC22B_HUMAN	38	28	O75396	Phyre	38:A	275	8.89	Intra	4	1	1	20182	4
KQAFNAYK	0	O75400	PR40A_HUMAN	438	437	####		####	####	RVPSNASWEQAMKMIINDPR	12	O75400	PR40A_HUMAN	420	407	####		####	####	####	Intra	1	0.89	2	25574	5
KQAFNAYK	0	O75400	PR40A_HUMAN	438	437	####		####	####	YSALAKLSEK	5	O75400	PR40A_HUMAN	433	427	####		####	####	####	Intra	2	1	2	18651	4
SKYHLK	1	O75436	VP26A_HUMAN	184	182	2FAU	Structure	184:A	1467	YFKQQEIILWR	2	O75436	VP26A_HUMAN	288	285	2FAU	Structure	288:A	2279	18.13	Intra	3	1	1	20729	4
HTEMITTLKK	8	O75475	PSIP1_HUMAN	401	392	####		####	####	FKVSQVIMEK	1	O75475	PSIP1_HUMAN	407	405	####		####	####	####	Intra	1	1	2	19817	4
IHAEIKNSLK	5	O75475	PSIP1_HUMAN	360	354	####		####	####	FKVSQVIMEK	1	O75475	PSIP1_HUMAN	407	405	####		####	####	####	Intra	6	1	2	18742	5
AKWDAWNALGSLPK	1	O75521	ECI2_HUMAN	92	90	####		####	####	DFENSMNQVKLLK	9	O75521	ECI2_HUMAN	51	41	####		####	####	####	Intra	2	1	2	31610	4
KDPGNEVK	0	O75521	ECI2_HUMAN	55	54	####		####	####	LKLYALYK	1	O75521	ECI2_HUMAN	64	62	####		####	####	####	Intra	3	1	2	20359	4
ALIDQEVKNGIPSNR	7	O75608	LYPA1_HUMAN	105	97	5SYM	Structure	105:B	4944	KATAAVIFLHGLGDTGHGWAEAFAGIR	0	O75608	LYPA1_HUMAN	19	18	5SYM	Structure	19:B	3625	14.05	Intra	2	1	1	30394	5
AAGKSGSALELSVENVK	3	O75688	PPM1B_HUMAN	90	86	####		####	####	SGSTAVGVMISPKHIYFINCGDSR	12	O75688	PPM1B_HUMAN	142	129	####		####	####	####	Intra	1	1	1	25126	5
IYLAKDK	4	O75821	EIF3G_HUMAN	272	267	2CQ0	Structure	272:A	727	TTGQSKGFAFISFHR	5	O75821	EIF3G_HUMAN	280	274	2CQ0	Structure	280:A	846	5.15	Intra	2	1	1	21508	5
EAIICKNIPR	5	O75874	IDHC_HUMAN	115	109	4UMX	Structure	115:A	892	LVSGWVKPIIIGR	6	O75874	IDHC_HUMAN	126	119	4UMX	Structure	126:A	981	9.79	Intra	4	1	6	26389	4
EAIICKNIPR	5	O75874	IDHC_HUMAN	115	109	4UMX	Structure	115:A	892	SQFEAQKIWYEHR	6	O75874	IDHC_HUMAN	243	236	4UMX	Structure	243:A	1925	24.96	Intra	2	1	6	19744	5
KYDGR	0	O75874	IDHC_HUMAN	218	217	4UMX	Structure	218:B	4966	QMWKSPNGTIR	3	O75874	IDHC_HUMAN	93	89	4UMX	Structure	93:B	3994	34.25	Intra	4	1	6	14212	4
KYDGR	0	O75874	IDHC_HUMAN	218	217	4UMX	Structure	218:B	4966	QM[147.04]WKSPNGTIR	3	O75874	IDHC_HUMAN	93	89	4UMX	Structure	93:B	3994	34.25	Intra	4	1	6	12425	4
LVSGWVKPIIIGR	6	O75874	IDHC_HUMAN	126	119	4UMX	Structure	126:A	981	SQFEAQKIWYEHR	6	O75874	IDHC_HUMAN	243	236	4UMX	Structure	243:A	1925	16.21	Intra	11	1	6	26278	4
NTILKK	4	O75874	IDHC_HUMAN	217	212	4UMX	Structure	217:B	4957	QMWKSPNGTIR	3	O75874	IDHC_HUMAN	93	89	4UMX	Structure	93:B	3994	35.95	Intra	1	1	6	16263	4
NSQKIDR	3	O76003	GLRX3_HUMAN	96	92	2WZ9	Structure	96:A	699	LDGAHAPELTKK	10	O76003	GLRX3_HUMAN	110	99	2WZ9	Structure	110:A	810	16.83	Intra	2	1	1	11298	5
TKQTAR	1	P68431	H31_HUMAN	5	3	5AV9	Structure	####	####	KDARQTPK	0	O76021	RL1D1_HUMAN	449	448	####		####	####	####	2	3	0.98	1	6135	4
ISYVVQSLKEYEGK	8	O94782	UBP1_HUMAN	741	732	O94782	Phyre	741:A	3211	ISYVVQSLKEYEGK	8	O94782	UBP1_HUMAN	741	732	O94782	Phyre	741:A	3211	####	1	3	0.7	1	24763	4
KSVFPK	0	O94822	LTN1_HUMAN	338	337	####		####	####	FWKYGK	2	O94822	LTN1_HUMAN	262	259	####		####	####	####	Intra	3	1	1	17972	4
LLAKAR	3	O94906	PRP6_HUMAN	667	663	5O9Z	Structure	667:G	30086	SKWLAGDVPAAR	1	O94906	PRP6_HUMAN	618	616	5O9Z	Structure	618:G	29838	23.09	Intra	3	1	1	18491	4
LEGCSKFVLAHGGR	5	O95340	PAPS2_HUMAN	315	309	O95340	Phyre	315:A	2286	DIHELFVPENKLDHVR	10	O95340	PAPS2_HUMAN	233	222	O95340	Phyre	233:A	1638	17.16	Intra	1	1	1	21347	6
HKFFQK	1	O95747	OXSR1_HUMAN	289	287	2VWI	Structure	289:A	1762	KMISLCLQK	0	O95747	OXSR1_HUMAN	266	265	2VWI	Structure	266:A	1577	9.36	Intra	1	0.89	3	18498	4
YGKSFR	2	O95747	OXSR1_HUMAN	262	259	2VWI	Structure	262:A	1540	KMISLCLQK	0	O95747	OXSR1_HUMAN	266	265	2VWI	Structure	266:A	1577	5.96	Intra	3	1	3	19317	4
YGKSFR	2	O95747	OXSR1_HUMAN	262	259	2VWI	Structure	262:A	1540	KM[147.04]ISLCLQK	0	O95747	OXSR1_HUMAN	266	265	2VWI	Structure	266:A	1577	5.96	Intra	3	1	3	17727	4
VKIMFNK	1	O95758	PTBP3_HUMAN	389	387	O95758	Phyre	389:A	1549	ATLSKHQAVQLPR	4	O95758	PTBP3_HUMAN	431	426	O95758	Phyre	431:A	1876	14.73	Intra	2	1	2	17362	5
VKIM[147.04]FNK	1	O95758	PTBP3_HUMAN	389	387	O95758	Phyre	389:A	1549	ATLSKHQAVQLPR	4	O95758	PTBP3_HUMAN	431	426	O95758	Phyre	431:A	1876	14.73	Intra	2	1	2	16370	5
TSKEPVSR	2	O95782	AP2A1_HUMAN	962	959	####		####	####	KHPDASVNFSEFSK	0	P09429	HMGB1_HUMAN	30	29	2YRQ	Structure	37:A	541	####	2	1	0.8	1	18728	4
LLIKLK	3	O95831	AIFM1_HUMAN	382	378	####		####	####	AGAEVKSR	5	O95831	AIFM1_HUMAN	278	272	####		####	####	####	Intra	4	1	1	17507	4
EGKPLPPHVR	2	O95834	EMAL2_HUMAN	133	130	####		####	####	LKLEWVYGYR	1	O95834	EMAL2_HUMAN	56	54	####		####	####	####	Intra	3	1	1	21733	5
ISGFPKNR	5	P00338	LDHA_HUMAN	155	149	5W8J	Structure	154:B	3857	NVNIFKFIIPNVVK	5	P00338	LDHA_HUMAN	118	112	5W8J	Structure	117:B	3543	17.72	Intra	1	1	4	33737	4
IVSGKDYNVTANSK	4	P00338	LDHA_HUMAN	81	76	5W8J	Structure	80:A	605	FIIPNVVKYSPNCK	7	P00338	LDHA_HUMAN	126	118	5W8J	Structure	125:A	965	14.52	Intra	4	1	4	23818	4
IVSGKDYNVTANSK	4	P00338	LDHA_HUMAN	81	76	5W8J	Structure	80:C	5867	NVNIFKFIIPNVVK	5	P00338	LDHA_HUMAN	118	112	5W8J	Structure	117:C	6153	15.11	Intra	12	1	4	34072	4
KSADTLWGIQK	0	P00338	LDHA_HUMAN	318	317	5W8J	Structure	317:B	5142	TLHPDLGTDKDKEQWK	9	P00338	LDHA_HUMAN	222	212	5W8J	Structure	221:B	4384	22.07	Intra	5	1	4	17716	5
NKHSAR	1	P00387	NB5R3_HUMAN	228	226	1UMK	Structure	227:A	1567	FKLWYTLDR	1	P00387	NB5R3_HUMAN	234	232	1UMK	Structure	233:A	1619	11.17	Intra	5	1	1	19641	5
QYNPKMVK	4	P00492	HPRT_HUMAN	156	151	5HIA	Structure	155:D	6200	DVMKEMGGHHIVALCVLK	3	P00492	HPRT_HUMAN	55	51	5HIA	Structure	54:D	5463	15.45	Intra	2	1	1	20029	5
EFSIYMTKDGR	7	P00505	AATM_HUMAN	404	396	5AX8	Structure	404:D	12388	DVFLPKPTWGNHTPIFR	5	P00505	AATM_HUMAN	159	153	5AX8	Structure	159:D	10436	15.83	Intra	5	1	4	28146	4
EFSIYM[147.04]TKDGR	7	P00505	AATM_HUMAN	404	396	5AX8	Structure	404:D	12388	DVFLPKPTWGNHTPIFR	5	P00505	AATM_HUMAN	159	153	5AX8	Structure	159:D	10436	15.83	Intra	2	1	4	26859	5
FFKFSR	2	P00505	AATM_HUMAN	150	147	5AX8	Structure	150:D	10358	VGAFTMVCKDADEAK	8	P00505	AATM_HUMAN	296	287	5AX8	Structure	296:D	11519	17.31	Intra	1	1	4	22471	4
FFKFSR	2	P00505	AATM_HUMAN	150	147	5AX8	Structure	150:D	10358	VGAFTM[147.04]VCKDADEAK	8	P00505	AATM_HUMAN	296	287	5AX8	Structure	296:D	11519	17.31	Intra	1	1	4	20272	4
AEKNGVK	2	P00558	PGK1_HUMAN	275	272	2WZD	Structure	274:A	2015	IVKDLMSK	2	P00558	PGK1_HUMAN	267	264	2WZD	Structure	266:A	1953	12.34	Intra	2	1	25	13843	4
AGGFLMKK	6	P00558	PGK1_HUMAN	191	184	2WZD	Structure	190:A	1352	AAVPSIKFCLDNGAK	6	P00558	PGK1_HUMAN	48	41	2WZD	Structure	47:A	358	15.74	Intra	1	1	25	23338	4
AGGFLMKK	6	P00558	PGK1_HUMAN	191	184	2WZD	Structure	190:A	1352	ELNYFAKALESPERPFLAILGGAK	6	P00558	PGK1_HUMAN	199	192	2WZD	Structure	198:A	1423	12.32	Intra	10	1	25	35984	5
AGGFLMKK	6	P00558	PGK1_HUMAN	191	184	2WZD	Structure	190:A	1352	IKAAVPSIK	1	P00558	PGK1_HUMAN	41	39	2WZD	Structure	40:A	311	15.47	Intra	11	1	25	19401	4
AGGFLMKK	6	P00558	PGK1_HUMAN	191	184	2WZD	Structure	190:A	1352	LTLDKLDVK	4	P00558	PGK1_HUMAN	11	6	2WZD	Structure	10:A	64	12.64	Intra	3	1	25	22382	4
AGGFLMKK	6	P00558	PGK1_HUMAN	191	184	2WZD	Structure	190:A	1352	LTLDKLDVKGK	8	P00558	PGK1_HUMAN	15	6	2WZD	Structure	14:A	96	21.25	Intra	7	1	25	19495	5
AGGFLMKK	6	P00558	PGK1_HUMAN	191	184	2WZD	Structure	190:A	1352	SLLGKDVLFLK	4	P00558	PGK1_HUMAN	91	86	2WZD	Structure	90:A	679	24.29	Intra	2	1	25	28239	4
AGGFLM[147.04]KK	6	P00558	PGK1_HUMAN	191	184	2WZD	Structure	190:A	1352	ELNYFAKALESPERPFLAILGGAK	6	P00558	PGK1_HUMAN	199	192	2WZD	Structure	198:A	1423	12.32	Intra	4	1	25	35221	5
AGGFLM[147.04]KK	6	P00558	PGK1_HUMAN	191	184	2WZD	Structure	190:A	1352	IKAAVPSIK	1	P00558	PGK1_HUMAN	41	39	2WZD	Structure	40:A	311	15.47	Intra	7	1	25	18073	4
AGGFLM[147.04]KK	6	P00558	PGK1_HUMAN	191	184	2WZD	Structure	190:A	1352	LTLDKLDVK	4	P00558	PGK1_HUMAN	11	6	2WZD	Structure	10:A	64	12.64	Intra	1	1	25	21102	4
AGGFLM[147.04]KK	6	P00558	PGK1_HUMAN	191	184	2WZD	Structure	190:A	1352	LTLDKLDVKGK	8	P00558	PGK1_HUMAN	15	6	2WZD	Structure	14:A	96	21.25	Intra	3	1	25	18376	5
DASGNKVK	5	P00558	PGK1_HUMAN	139	133	P00558	Phyre	139:A	1041	FHVEEEGKGK	7	P00558	PGK1_HUMAN	131	123	P00558	Phyre	131:A	988	7.53	Intra	7	1	25	9399	5
IKAAVPSIK	1	P00558	PGK1_HUMAN	41	39	2WZD	Structure	40:A	311	GTKALMDEVVK	2	P00558	PGK1_HUMAN	353	350	2WZD	Structure	352:A	2610	24.5	Intra	2	1	25	21623	4
IKAAVPSIK	1	P00558	PGK1_HUMAN	41	39	2WZD	Structure	40:A	311	KELNYFAK	0	P00558	PGK1_HUMAN	192	191	2WZD	Structure	191:A	1361	13.75	Intra	4	1	25	20254	4
IVKDLMSK	2	P00558	PGK1_HUMAN	267	264	2WZD	Structure	266:A	1953	KYAEAVTR	0	P00558	PGK1_HUMAN	323	322	2WZD	Structure	322:A	2370	21.3	Intra	3	1	25	15892	4
KELNYFAK	0	P00558	PGK1_HUMAN	192	191	2WZD	Structure	191:A	1361	LTLDKLDVK	4	P00558	PGK1_HUMAN	11	6	2WZD	Structure	10:A	64	15.4	Intra	1	1	25	23543	4
KYAEAVTR	0	P00558	PGK1_HUMAN	323	322	2WZD	Structure	####	####	KYAEAVTR	0	P00558	PGK1_HUMAN	323	322	2WZD	Structure	####	####	####	1	4	1	25	15904	4
KYAEAVTR	0	P00558	PGK1_HUMAN	323	322	2WZD	Structure	322:A	2370	NGVKITLPVDFVTADKFDENAK	3	P00558	PGK1_HUMAN	279	275	2WZD	Structure	278:A	2043	11.65	Intra	1	1	25	25514	4
LDVKGK	3	P00558	PGK1_HUMAN	15	11	2WZD	Structure	14:A	96	AGGFLMKK	6	P00558	PGK1_HUMAN	191	184	2WZD	Structure	190:A	1352	21.25	Intra	4	1	25	16480	4
LDVKGK	3	P00558	PGK1_HUMAN	15	11	2WZD	Structure	14:A	96	AGGFLM[147.04]KK	6	P00558	PGK1_HUMAN	191	184	2WZD	Structure	190:A	1352	21.25	Intra	1	1	25	14950	4
LTLDKLDVK	4	P00558	PGK1_HUMAN	11	6	2WZD	Structure	10:A	64	ELNYFAKALESPERPFLAILGGAK	6	P00558	PGK1_HUMAN	199	192	2WZD	Structure	198:A	1423	22.73	Intra	1	1	25	36549	5
VDFNVPMKNNQITNNQR	7	P00558	PGK1_HUMAN	30	22	2WZD	Structure	29:A	218	ALESPERPFLAILGGAKVADK	16	P00558	PGK1_HUMAN	216	199	2WZD	Structure	215:A	1547	17.94	Intra	2	1	25	28090	5
VDFNVPMKNNQITNNQR	7	P00558	PGK1_HUMAN	30	22	2WZD	Structure	29:A	218	SVVLMSHLGRPDGVPMPDKYSLEPVAVELK	18	P00558	PGK1_HUMAN	75	56	2WZD	Structure	74:A	557	11.12	Intra	3	1	25	27292	5
VKAEPAK	1	P00558	PGK1_HUMAN	141	139	P00558	Phyre	141:A	1057	FHVEEEGKGK	7	P00558	PGK1_HUMAN	131	123	P00558	Phyre	131:A	988	4.58	Intra	6	1	25	9099	4
VKAEPAK	1	P00558	PGK1_HUMAN	141	139	P00558	Phyre	141:A	1057	FHVEEEGKGKDASGNK	9	P00558	PGK1_HUMAN	133	123	P00558	Phyre	133:A	1001	8.2	Intra	1	1	25	7424	5
FIGMKSR	4	P00966	ASSY_HUMAN	277	272	2NZ2	Structure	277:A	2152	VQVSVLKGQVYILGR	6	P00966	ASSY_HUMAN	355	348	2NZ2	Structure	355:A	2782	30.42	Intra	3	1	10	25675	4
FIGMKSR	4	P00966	ASSY_HUMAN	277	272	2NZ2	Structure	277:A	2152	YVSHGATGKGNDQVR	8	P00966	ASSY_HUMAN	121	112	2NZ2	Structure	121:A	919	10.47	Intra	1	1	10	11779	5
FIGM[147.04]KSR	4	P00966	ASSY_HUMAN	277	272	2NZ2	Structure	277:A	2152	YVSHGATGKGNDQVR	8	P00966	ASSY_HUMAN	121	112	2NZ2	Structure	121:A	919	10.47	Intra	3	1	10	9766	5
HCIAKSQER	4	P00966	ASSY_HUMAN	340	335	2NZ2	Structure	####	####	HCIAKSQER	4	P00966	ASSY_HUMAN	340	335	2NZ2	Structure	####	####	####	1	2	1	10	6124	4
KGVPVK	0	P00966	ASSY_HUMAN	229	228	2NZ2	Structure	229:A	1781	HCIAKSQER	4	P00966	ASSY_HUMAN	340	335	2NZ2	Structure	340:A	2665	8.77	Intra	7	1	10	8439	4
KGVPVK	0	P00966	ASSY_HUMAN	229	228	2NZ2	Structure	####	####	KGVPVK	0	P00966	ASSY_HUMAN	229	228	2NZ2	Structure	####	####	####	1	4	1	10	11214	4
LKEYHR	1	P00966	ASSY_HUMAN	400	398	P00966	Phyre	400:A	3067	LQSKVTAK	3	P00966	ASSY_HUMAN	408	404	####		####	####	####	Intra	2	1	10	8984	5
LKEYHR	1	P00966	ASSY_HUMAN	400	398	2NZ2	Structure	400:A	3119	VQVSVLKGQVYILGR	6	P00966	ASSY_HUMAN	355	348	2NZ2	Structure	355:A	2782	50.3	Intra	2	1	10	21713	4
LKEYHR	1	P00966	ASSY_HUMAN	400	398	2NZ2	Structure	400:A	3119	YVSHGATGKGNDQVR	8	P00966	ASSY_HUMAN	121	112	2NZ2	Structure	121:A	919	54.23	Intra	2	1	10	7153	5
YVSHGATGKGNDQVR	8	P00966	ASSY_HUMAN	121	112	2NZ2	Structure	121:A	919	FELSCYSLAPQIKVIAPWR	12	P00966	ASSY_HUMAN	140	127	2NZ2	Structure	140:A	1070	20.09	Intra	6	1	10	27355	4
GFGYKGSCFHR	4	P62937	PPIA_HUMAN	49	44	4N1M	Structure	49:A	706	YVSHGATGKGNDQVR	8	P00966	ASSY_HUMAN	121	112	2NZ2	Structure	121:A	919	####	2	1	0.95	1	16256	4
FPPKFTLK	3	P02545	LMNA_HUMAN	486	482	1IFR	Structure	486:A	441	AGQVVTIWAAGAGATHSPPTDLVWKAQNTWGCGNSLR	24	P02545	LMNA_HUMAN	515	490	1IFR	Structure	515:A	655	17.19	Intra	1	1	6	31102	4
KEGDLIAAQAR	0	P02545	LMNA_HUMAN	123	122	####		####	####	LKDLEALLNSK	1	P02545	LMNA_HUMAN	135	133	####		####	####	####	Intra	1	1	6	25553	4
KLESTESR	0	P02545	LMNA_HUMAN	420	419	P02545	Phyre	420:A	140	ASSHSSQTQGGGSVTKK	15	P02545	LMNA_HUMAN	417	401	P02545	Phyre	417:A	111	6.84	Intra	3	1	6	6309	5
KLESTESR	0	P02545	LMNA_HUMAN	420	419	P02545	Phyre	420:A	140	KLLEGEEER	0	P02545	LMNA_HUMAN	378	377	####		####	####	####	Intra	1	1	6	12748	4
LKDLEALLNSKEAALSTALSEK	10	P02545	LMNA_HUMAN	144	133	1IFR	Structure	####	####	LKDLEALLNSKEAALSTALSEK	10	P02545	LMNA_HUMAN	144	133	1IFR	Structure	####	####	####	1	1	1	6	39714	6
TYSAKLDNAR	4	P02545	LMNA_HUMAN	270	265	####		####	####	AQHEDQVEQYKK	10	P02545	LMNA_HUMAN	260	249	####		####	####	####	Intra	8	1	6	10990	5
AGKITFAEK	2	P02786	TFR1_HUMAN	261	258	3S9L	Structure	261:A	1079	HVFWGSGSHTLPALLENLKLR	18	P02786	TFR1_HUMAN	717	698	3S9L	Structure	717:A	4625	22.47	Intra	2	1	3	27847	6
LVHANFGTKK	8	P02786	TFR1_HUMAN	240	231	3S9L	Structure	240:A	931	VEYHFLSPYVSPKESPFR	12	P02786	TFR1_HUMAN	693	680	3S9L	Structure	693:A	4432	25.46	Intra	3	1	3	20821	5
VEYHFLSPYVSPKESPFR	12	P02786	TFR1_HUMAN	693	680	3S9L	Structure	693:B	9235	VEYHFLSPYVSPKESPFR	12	P02786	TFR1_HUMAN	693	680	3S9L	Structure	693:A	4432	80.77	1	2	1	3	27674	6
ALQASALKAWGGK	7	P04075	ALDOA_HUMAN	312	304	P04075	Phyre	312:A	2371	CVLKIGEHTPSALAIMENANVLAR	3	P04075	ALDOA_HUMAN	153	149	P04075	Phyre	153:A	1162	28.99	Intra	1	1	5	29372	5
ALQASALKAWGGK	7	P04075	ALDOA_HUMAN	312	304	P04075	Phyre	312:A	2371	GILAADESTGSIAKR	13	P04075	ALDOA_HUMAN	42	28	P04075	Phyre	42:A	300	12.95	Intra	4	1	5	22522	4
ALQASALKAWGGKK	7	P04075	ALDOA_HUMAN	312	304	P04075	Phyre	312:A	2371	GILAADESTGSIAKR	13	P04075	ALDOA_HUMAN	42	28	P04075	Phyre	42:A	300	12.95	Intra	3	1	5	19281	4
GGVVGIKVDK	6	P04075	ALDOA_HUMAN	108	101	P04075	Phyre	108:A	825	GILAADESTGSIAKR	13	P04075	ALDOA_HUMAN	42	28	P04075	Phyre	42:A	300	18.08	Intra	1	1	5	19842	4
KDGADFAK	0	P04075	ALDOA_HUMAN	140	139	5KY6	Structure	139:B	6966	VNPCIGGVILFHETLYQKADDGRPFPQVIK	17	P04075	ALDOA_HUMAN	87	69	5KY6	Structure	86:B	6187	16.54	Intra	1	1	5	26975	4
KALTGHLEEVVLALLK	0	P04083	ANXA1_HUMAN	98	97	1AIN	Structure	71:A	66	AAYLQETGKPLDETLK	8	P04083	ANXA1_HUMAN	90	81	1AIN	Structure	63:A	58	11.95	Intra	3	1	2	35671	5
NALLSLAKGDR	7	P04083	ANXA1_HUMAN	185	177	1AIN	Structure	158:A	153	DLAKDITSDTSGDFR	3	P04083	ANXA1_HUMAN	166	162	1AIN	Structure	139:A	134	12.24	Intra	1	1	2	25402	4
DWDAWKVCLR	5	P04181	OAT_HUMAN	392	386	2OAT	Structure	392:A	2777	DNGLLAKPTHGDIIR	6	P04181	OAT_HUMAN	405	398	2OAT	Structure	405:A	2878	10.37	Intra	1	1	1	25871	5
EVEVIGGADKYHSVCR	9	P04183	KITH_HUMAN	180	170	2ORV	Structure	180:B	2375	KPFGAILNLVPLAESVVK	0	P04183	KITH_HUMAN	131	130	2ORV	Structure	131:B	2008	18.09	Intra	1	1	3	35318	4
KASGQPAGPDNK	0	P04183	KITH_HUMAN	192	191	####		####	####	KPFGAILNLVPLAESVVK	0	P04183	KITH_HUMAN	131	130	####		####	####	####	Intra	1	1	3	36347	4
KPFGAILNLVPLAESVVK	0	P04183	KITH_HUMAN	131	130	2ORV	Structure	131:B	2008	KPFGAILNLVPLAESVVK	0	P04183	KITH_HUMAN	131	130	2ORV	Structure	131:A	779	18.74	1	8	1	3	49270	4
AVGKVIPELNGK	3	P04406	G3P_HUMAN	219	215	1U8F	Structure	219:Q	6708	VIHDNFGIVEGLMTTVHAITATQKTVDGPSGK	23	P04406	G3P_HUMAN	186	162	1U8F	Structure	186:Q	6477	30.99	Intra	1	1	16	34547	5
DPSKIK	3	P04406	G3P_HUMAN	84	80	1U8F	Structure	84:P	3175	TVDGPSGKLWR	7	P04406	G3P_HUMAN	194	186	1U8F	Structure	194:P	3988	28.65	Intra	1	1	16	16789	4
FHGTVKAENGK	5	P04406	G3P_HUMAN	61	55	1U8F	Structure	61:P	2997	KVVKQASEGPLK	3	P04406	G3P_HUMAN	263	259	1U8F	Structure	263:P	4506	42.51	Intra	2	1	16	9210	5
FHGTVKAENGK	5	P04406	G3P_HUMAN	61	55	1U8F	Structure	61:P	2997	TVDGPSGKLWR	7	P04406	G3P_HUMAN	194	186	1U8F	Structure	194:P	3988	39.05	Intra	6	1	16	14130	5
TVDGPSGKLWR	7	P04406	G3P_HUMAN	194	186	1U8F	Structure	194:Q	6529	AVGKVIPELNGK	3	P04406	G3P_HUMAN	219	215	1U8F	Structure	219:Q	6708	25.43	Intra	8	1	16	22645	4
TVDGPSGKLWR	7	P04406	G3P_HUMAN	194	186	1U8F	Structure	194:P	3988	LEKPAKYDDIKK	5	P04406	G3P_HUMAN	254	248	1U8F	Structure	254:P	4429	43.36	Intra	1	1	16	14431	5
TVDGPSGKLWR	7	P04406	G3P_HUMAN	194	186	1U8F	Structure	194:P	3988	LVINGNPITIFQERDPSKIK	17	P04406	G3P_HUMAN	84	66	1U8F	Structure	84:P	3175	28.65	Intra	1	1	16	26335	5
TVDGPSGKLWR	7	P04406	G3P_HUMAN	194	186	1U8F	Structure	194:Q	6529	TVDGPSGKLWR	7	P04406	G3P_HUMAN	194	186	1U8F	Structure	194:P	3988	28.19	1	5	1	16	20886	4
TVDGPSGKLWR	7	P04406	G3P_HUMAN	194	186	1U8F	Structure	194:R	9053	VIHDNFGIVEGLMTTVHAITATQKTVDGPSGK	23	P04406	G3P_HUMAN	186	162	1U8F	Structure	186:R	9001	13.74	1	4	1	16	34920	5
VIPELNGKLTGMAFR	7	P04406	G3P_HUMAN	227	219	1U8F	Structure	227:O	1694	VIISAPSADAPMFVMGVNHEKYDNSLK	20	P04406	G3P_HUMAN	139	118	1U8F	Structure	139:O	1048	21.22	Intra	1	1	16	30516	5
VKVGVNGFGR	1	P04406	G3P_HUMAN	5	3	1U8F	Structure	5:O	18	FHGTVKAENGK	5	P04406	G3P_HUMAN	61	55	1U8F	Structure	61:O	458	19.98	Intra	1	1	16	13247	5
VVKQASEGPLK	2	P04406	G3P_HUMAN	263	260	1U8F	Structure	263:P	4506	FHGTVKAENGK	5	P04406	G3P_HUMAN	61	55	1U8F	Structure	61:P	2997	42.51	Intra	8	1	16	10694	5
YDDIKK	4	P04406	G3P_HUMAN	259	254	1U8F	Structure	259:O	1941	AVGKVIPELNGK	3	P04406	G3P_HUMAN	219	215	1U8F	Structure	219:O	1634	25.51	Intra	2	1	16	18600	4
YDDIKK	4	P04406	G3P_HUMAN	259	254	1U8F	Structure	259:P	4474	FHGTVKAENGK	5	P04406	G3P_HUMAN	61	55	1U8F	Structure	61:P	2997	46.55	Intra	5	1	16	9325	5
YDDIKK	4	P04406	G3P_HUMAN	259	254	1U8F	Structure	259:Q	7015	TVDGPSGKLWR	7	P04406	G3P_HUMAN	194	186	1U8F	Structure	194:Q	6529	40.89	Intra	3	1	16	16720	4
YDDIKK	4	P04406	G3P_HUMAN	259	254	1U8F	Structure	259:R	9539	VVKQASEGPLK	2	P04406	G3P_HUMAN	263	260	1U8F	Structure	263:R	9571	5.96	Intra	3	1	16	13013	4
KVEKVTISNR	3	P08238	HS90B_HUMAN	577	573	3PRY	Structure	####	####	FHGTVKAENGK	5	P04406	G3P_HUMAN	61	55	1U8F	Structure	61:O	458	####	1	1	0.71	1	8630	5
EKVYQMLQK	1	Q13546	RIPK1_HUMAN	627	625	4NEU	Structure	####	####	TVDGPSGKLWR	7	P04406	G3P_HUMAN	194	186	1U8F	Structure	194:O	1455	####	2	1	0.87	1	14182	5
YLWNNIKR	6	P04632	CPNS1_HUMAN	172	165	1KFU	Structure	872:S	6328	WQAIYKQFDTDR	5	P04632	CPNS1_HUMAN	179	173	1KFU	Structure	879:S	6396	11.35	Intra	4	1	1	24133	4
DGVVEITGKHEER	8	P04792	HSPB1_HUMAN	123	114	4MJH	Structure	123:A	300	VSLDVNHFAPDELTVKTK	15	P04792	HSPB1_HUMAN	112	96	4MJH	Structure	112:A	221	13.79	Intra	1	0.91	1	21046	4
LVAGKLK	4	P04843	RPN1_HUMAN	576	571	P04843	Unknown	576:A	823	ELVLKSAVEAER	4	P04843	RPN1_HUMAN	564	559	P04843	Unknown	564:A	738	18.88	Intra	1	1	2	21289	4
NVESYTKLGNPTR	6	P04843	RPN1_HUMAN	187	180	####		####	####	DVPAYSQDTFKVHYENNSPFLTITSMTR	10	P04843	RPN1_HUMAN	215	204	####		####	####	####	Intra	1	1	2	27794	5
NDEELNKLLGR	6	P04908	H2A1B_HUMAN	96	89	5B0Z	Structure	95:G	5090	NDEELNKLLGR	6	P04908	H2A1B_HUMAN	96	89	5B0Z	Structure	95:C	2073	26.49	1	1	1	1	27064	4
KQLATK	0	P68431	H31_HUMAN	19	18	5AV9	Structure	####	####	KTESHHK	0	P04908	H2A1B_HUMAN	120	119	5B0Z	Structure	####	####	####	1	2	1	5	4540	5
KTESHHK	0	P04908	H2A1B_HUMAN	120	119	5B0Z	Structure	####	####	RYQKSTELLIR	3	P68431	H31_HUMAN	57	53	5AV9	Structure	56:A	171	####	1	6	1	5	10880	5
KTESHHK	0	P04908	H2A1B_HUMAN	120	119	5B0Z	Structure	####	####	YQKSTELLIR	2	P68431	H31_HUMAN	57	54	5AV9	Structure	56:A	171	####	1	19	1	5	12245	5
TKQTAR	1	P68431	H31_HUMAN	5	3	5AV9	Structure	####	####	KTESHHK	0	P04908	H2A1B_HUMAN	120	119	5B0Z	Structure	####	####	####	1	6	1	5	3810	5
TKQTAR	1	P68431	H31_HUMAN	5	3	5AV9	Structure	####	####	TESHHKAK	5	P04908	H2A1B_HUMAN	126	120	5B0Z	Structure	####	####	####	1	1	1	5	3868	5
YFQRITLYLMGKK	11	P05015	IFN16_HUMAN	157	145	P05015	Phyre	157:A	1082	YFQRITLYLMGKK	11	P05015	IFN16_HUMAN	157	145	P05015	Phyre	157:A	1082	####	N/A	1	0.79	1	35095	5
AFFKGAWSNVLR	3	P05141	ADT2_HUMAN	272	268	P05141	Phyre	272:A	2091	DFLAGGVAAAISKTAVAPIER	12	P05141	ADT2_HUMAN	23	10	P05141	Phyre	23:A	134	20.62	Intra	1	1	6	36402	4
AFFKGAWSNVLR	3	P05141	ADT2_HUMAN	272	268	P05141	Phyre	272:A	2091	KGTDIMYTGTLDCWR	0	P05141	ADT2_HUMAN	245	244	P05141	Phyre	245:A	1876	25.55	Intra	5	1	6	30721	4
AFFKGAWSNVLR	3	P05141	ADT2_HUMAN	272	268	P05141	Phyre	272:A	2091	LLLQVQHASKQITADK	9	P05141	ADT2_HUMAN	43	33	P05141	Phyre	43:A	288	17.83	Intra	6	1	6	24977	4
LAADVGKAGAER	6	P05141	ADT2_HUMAN	147	140	P05141	Phyre	147:A	1111	AFFKGAWSNVLR	3	P05141	ADT2_HUMAN	272	268	P05141	Phyre	272:A	2091	23.6	Intra	2	1	6	23935	4
LAADVGKAGAER	6	P05141	ADT2_HUMAN	147	140	P05141	Phyre	147:A	1111	VKLLLQVQHASK	1	P05141	ADT2_HUMAN	33	31	P05141	Phyre	33:A	209	19.12	Intra	2	1	6	18031	4
VKLLLQVQHASK	1	P05141	ADT2_HUMAN	33	31	P05141	Phyre	33:A	209	KGTDIMYTGTLDCWR	0	P05141	ADT2_HUMAN	245	244	P05141	Phyre	245:A	1876	26.33	Intra	4	1	6	24253	4
LTPQAVKIR	6	P05198	IF2A_HUMAN	190	183	P05198	Unknown	190:A	3108	AGLNCSTENMPIKINLIAPPR	12	P05198	IF2A_HUMAN	226	213	P05198	Unknown	226:A	3649	11.23	Intra	1	0.91	1	27561	4
GKAVVLMGK	1	P05388	RLA0_HUMAN	50	48	P05388	Phyre	50:A	369	ITVKLTIQNR	3	P30050	RL12_HUMAN	61	57	5A8L	Structure	61:G	7398	####	1	2	0.97	1	21236	4
AKEALGK	1	P05455	LA_HUMAN	280	278	####		####	####	AKDANNGNLQLR	1	P05455	LA_HUMAN	287	285	####		####	####	####	Intra	2	1	1	12463	4
EHLEKK	4	P05783	K1C18_HUMAN	118	113	P05783	Phyre	118:A	355	DWSHYFKIIEDLR	6	P05783	K1C18_HUMAN	131	124	P05783	Phyre	131:A	459	16.29	Intra	1	1	12	26323	5
EHLEKK	4	P05783	K1C18_HUMAN	118	113	P05783	Phyre	118:A	355	RLESKIR	4	P05783	K1C18_HUMAN	111	106	P05783	Phyre	111:A	291	10.83	Intra	6	1	12	8644	5
KGPQVR	0	P05783	K1C18_HUMAN	119	118	####		####	####	DWSHYFKIIEDLR	6	P05783	K1C18_HUMAN	131	124	P05783	Phyre	131:A	459	####	Intra	10	1	12	28492	4
KGPQVR	0	P05783	K1C18_HUMAN	119	118	####		####	####	LESKIR	3	P05783	K1C18_HUMAN	111	107	P05783	Phyre	111:A	291	####	Intra	6	1	12	10955	4
KGPQVR	0	P05783	K1C18_HUMAN	119	118	####		####	####	RLESKIR	4	P05783	K1C18_HUMAN	111	106	P05783	Phyre	111:A	291	####	Intra	6	1	12	9872	4
KVIDDTNITR	0	P05783	K1C18_HUMAN	187	186	####		####	####	NLKASLENSLR	2	P05783	K1C18_HUMAN	317	314	####		####	####	####	Intra	1	1	12	20907	4
LESKIR	3	P05783	K1C18_HUMAN	111	107	P05783	Phyre	111:A	291	EHLEKK	4	P05783	K1C18_HUMAN	118	113	P05783	Phyre	118:A	355	10.83	Intra	5	1	12	9505	5
LESKIR	3	P05783	K1C18_HUMAN	111	107	P05783_P05783	Docking	111:A	291	LESKIR	3	P05783	K1C18_HUMAN	111	107	P05783_P05783	Docking	111:B	291	15.31	1	1	1	12	12996	4
LESKIR	3	P05783	K1C18_HUMAN	111	107	P05783	Phyre	111:A	291	RLESKIR	4	P05783	K1C18_HUMAN	111	106	P05783	Phyre	111:A	291	0	1	6	1	12	11755	4
RLESKIR	4	P05783	K1C18_HUMAN	111	106	P05783	Phyre	111:A	291	DWSHYFKIIEDLR	6	P05783	K1C18_HUMAN	131	124	P05783	Phyre	131:A	459	27.08	Intra	1	1	12	27086	5
VKLEAEIATYR	1	P05783	K1C18_HUMAN	372	370	####		####	####	VVSETNDTKVLR	8	P05783	K1C18_HUMAN	426	417	####		####	####	####	Intra	1	1	12	20703	4
VVSETNDTKVLR	8	P05783	K1C18_HUMAN	426	417	####		####	####	VVSETNDTKVLR	8	P05783	K1C18_HUMAN	426	417	####		####	####	####	1	1	1	12	16460	4
AVVVKK	4	P05787	K2C8_HUMAN	464	459	P05783_P05787	Docking	464:B	####	LESKIR	3	P05783	K1C18_HUMAN	111	107	P05783_P05787	Docking	111:A	291	####	1	1	1	18	12175	4
AVVVKK	4	P05787	K2C8_HUMAN	464	459	P05783_P05787	Docking	464:B	####	RLESKIR	4	P05783	K1C18_HUMAN	111	106	P05783_P05787	Docking	111:A	291	####	1	1	1	18	10906	5
EHLEKK	4	P05783	K1C18_HUMAN	118	113	P05783_P05787	Docking	118:A	355	MLETKWSLLQQQK	4	P05787	K2C8_HUMAN	122	117	P05783_P05787	Docking	122:B	637	14.05	1	1	1	18	18861	4
KGPQVR	0	P05783	K1C18_HUMAN	119	118	P05783_P05787	Docking	119:A	####	MLETKWSLLQQQK	4	P05787	K2C8_HUMAN	122	117	P05783_P05787	Docking	122:B	637	####	1	9	1	18	20686	4
KGPQVR	0	P05783	K1C18_HUMAN	119	118	P05783_P05787	Docking	119:A	####	M[147.04]LETKWSLLQQQK	4	P05787	K2C8_HUMAN	122	117	P05783_P05787	Docking	122:B	637	####	1	3	1	18	19564	4
KGPQVR	0	P05783	K1C18_HUMAN	119	118	P05783_P05787	Docking	119:A	####	WSLLQQQKTAR	7	P05787	K2C8_HUMAN	130	122	P05783_P05787	Docking	130:B	709	####	1	4	1	18	17067	4
KLLEGEESR	0	P05787	K2C8_HUMAN	393	392	P05783_P05787	Docking	393:B	2837	NLKASLENSLR	2	P05783	K1C18_HUMAN	317	314	P05783_P05787	Docking	317:A	####	####	1	2	1	18	20795	4
KLLEGEESR	0	P05787	K2C8_HUMAN	393	392	P05783_P05787	Docking	393:B	2837	VKLEAEIATYR	1	P05783	K1C18_HUMAN	372	370	P05783_P05787	Docking	372:A	####	####	1	2	1	18	20553	4
KLLEGEESR	0	P05787	K2C8_HUMAN	393	392	P05783_P05787	Docking	393:B	2837	VVSETNDTKVLR	8	P05783	K1C18_HUMAN	426	417	P05783_P05787	Docking	426:A	####	####	1	3	1	18	16206	4
NLKASLENSLR	2	P05783	K1C18_HUMAN	317	314	P05783_P05787	Docking	317:A	####	LQAEIEGLKGQR	8	P05787	K2C8_HUMAN	325	316	P05783_P05787	Docking	325:B	2304	####	1	1	1	18	22484	4
NLKASLENSLR	2	P05783	K1C18_HUMAN	317	314	P05783_P05787	Docking	317:A	####	MLETKWSLLQQQK	4	P05787	K2C8_HUMAN	122	117	P05783_P05787	Docking	122:B	637	####	1	1	1	18	26361	4
RLESKIR	4	P05783	K1C18_HUMAN	111	106	P05783_P05787	Docking	111:A	291	SYKVSTSGPR	2	P05787	K2C8_HUMAN	11	8	P05783_P05787	Docking	11:B	####	####	1	1	1	18	11011	4
RLESKIR	4	P05783	K1C18_HUMAN	111	106	P05783_P05787	Docking	111:A	291	TKTEISEMNR	1	P05787	K2C8_HUMAN	304	302	P05783_P05787	Docking	304:B	2136	100.32	1	1	1	18	11974	5
RLESKIR	4	P05783	K1C18_HUMAN	111	106	P05783_P05787	Docking	111:A	291	WSLLQQQKTAR	7	P05787	K2C8_HUMAN	130	122	P05783_P05787	Docking	130:B	709	14.44	1	3	1	18	16558	5
SQDLAKIMADIR	5	P05783	K1C18_HUMAN	247	241	P05783_P05787	Docking	247:A	####	TLNNKFASFIDK	4	P05787	K2C8_HUMAN	101	96	P05783_P05787	Docking	101:B	457	####	1	3	1	18	30455	4
VKLEAEIATYR	1	P05783	K1C18_HUMAN	372	370	P05783_P05787	Docking	372:A	####	TLNNKFASFIDK	4	P05787	K2C8_HUMAN	101	96	P05783_P05787	Docking	101:B	457	####	1	1	1	18	26899	4
VTQKSYK	3	P05787	K2C8_HUMAN	8	4	P05783_P05787	Docking	8:B	####	RLESKIR	4	P05783	K1C18_HUMAN	111	106	P05783_P05787	Docking	111:A	291	####	1	1	1	18	9441	5
VVSETNDTKVLR	8	P05783	K1C18_HUMAN	426	417	P05783_P05787	Docking	426:A	####	MLETKWSLLQQQK	4	P05787	K2C8_HUMAN	122	117	P05783_P05787	Docking	122:B	637	####	1	1	1	18	23944	4
KGPQVR	0	P05783	K1C18_HUMAN	119	118	####		####	####	LLETKWTLLQEQK	4	P08729	K2C7_HUMAN	122	117	####		####	####	####	1	3	1	2	21743	4
NLKASLENSLR	2	P05783	K1C18_HUMAN	317	314	####		####	####	AKLEAAIAEAEER	1	P08729	K2C7_HUMAN	331	329	P08729	Phyre	331:A	176	####	1	2	1	2	25196	4
KGPQVR	0	P05783	K1C18_HUMAN	119	118	####		####	####	KGWLYYEAGQR	0	Q15149	PLEC_HUMAN	4513	4512	5J1I	Structure	####	####	####	1	2	1	1	17239	4
AKQDMAR	1	P05787	K2C8_HUMAN	364	362	P05787	Phyre	364:A	2591	TKTEISEMNR	1	P05787	K2C8_HUMAN	304	302	P05787	Phyre	304:A	2136	52.36	Intra	1	1	19	11204	4
AKQDMAR	1	P05787	K2C8_HUMAN	364	362	P05787	Phyre	364:A	2591	TKTEISEM[147.04]NR	1	P05787	K2C8_HUMAN	304	302	P05787	Phyre	304:A	2136	52.36	Intra	2	1	19	9203	4
AVVVKK	4	P05787	K2C8_HUMAN	464	459	####		####	####	DGKLVSESSDVLPK	2	P05787	K2C8_HUMAN	472	469	####		####	####	####	Intra	2	1	19	18231	4
AVVVKK	4	P05787	K2C8_HUMAN	464	459	####		####	####	MLETKWSLLQQQK	4	P05787	K2C8_HUMAN	122	117	P05787	Phyre	122:A	637	####	Intra	1	1	19	21388	4
AVVVKK	4	P05787	K2C8_HUMAN	464	459	####		####	####	WSLLQQQKTAR	7	P05787	K2C8_HUMAN	130	122	P05787	Phyre	130:A	709	####	Intra	1	1	19	17903	4
FASFIDKVR	6	P05787	K2C8_HUMAN	108	101	P05787_P05787	Docking	108:A	515	MLETKWSLLQQQK	4	P05787	K2C8_HUMAN	122	117	P05787_P05787	Docking	122:B	637	26.51	Intra	7	1	19	26778	4
FASFIDKVR	6	P05787	K2C8_HUMAN	108	101	P05787_P05787	Docking	108:A	515	M[147.04]LETKWSLLQQQK	4	P05787	K2C8_HUMAN	122	117	P05787_P05787	Docking	122:B	637	26.51	Intra	3	1	19	25926	4
GELAIKDANAK	5	P05787	K2C8_HUMAN	347	341	P05787	Phyre	347:A	2464	LQAEIEGLKGQR	8	P05787	K2C8_HUMAN	325	316	P05787	Phyre	325:A	2304	32.39	Intra	2	1	19	19350	4
KIETR	0	P05787	K2C8_HUMAN	465	464	####		####	####	MLETKWSLLQQQK	4	P05787	K2C8_HUMAN	122	117	P05787	Phyre	122:A	637	####	Intra	1	1	19	20916	4
KLLEGEESR	0	P05787	K2C8_HUMAN	393	392	P05787_P05787	Docking	393:A	2837	WSLLQQQKTAR	7	P05787	K2C8_HUMAN	130	122	P05787_P05787	Docking	130:B	709	12.49	Intra	2	1	19	19293	4
LQAEIEGLKGQR	8	P05787	K2C8_HUMAN	325	316	P05787_P05787	Docking	325:A	2304	LQAEIEGLKGQR	8	P05787	K2C8_HUMAN	325	316	P05787_P05787	Docking	325:B	2304	80.11	N/A	4	1	19	20878	4
SYKVSTSGPR	2	P05787	K2C8_HUMAN	11	8	####		####	####	MLETKWSLLQQQK	4	P05787	K2C8_HUMAN	122	117	P05787	Phyre	122:A	637	####	Intra	2	1	19	21196	4
SYKVSTSGPR	2	P05787	K2C8_HUMAN	11	8	####		####	####	SYKVSTSGPR	2	P05787	K2C8_HUMAN	11	8	####		####	####	####	N/A	2	1	19	11635	4
SYKVSTSGPR	2	P05787	K2C8_HUMAN	11	8	####		####	####	WSLLQQQKTAR	7	P05787	K2C8_HUMAN	130	122	P05787	Phyre	130:A	709	####	Intra	1	1	19	17683	4
TKTEISEMNR	1	P05787	K2C8_HUMAN	304	302	P05787	Phyre	304:A	2136	LQAEIEGLKGQR	8	P05787	K2C8_HUMAN	325	316	P05787	Phyre	325:A	2304	10.78	Intra	4	1	19	17945	4
TQEKEQIK	3	P05787	K2C8_HUMAN	92	88	P05787	Phyre	92:A	382	KLLEGEESR	0	P05787	K2C8_HUMAN	393	392	P05787	Phyre	393:A	2837	64.08	Intra	3	1	19	12654	4
TQEKEQIK	3	P05787	K2C8_HUMAN	92	88	P05787_P05787	Docking	92:A	382	TLNNKFASFIDK	4	P05787	K2C8_HUMAN	101	96	P05787_P05787	Docking	101:B	457	29.06	Intra	1	1	19	22009	4
VTQKSYK	3	P05787	K2C8_HUMAN	8	4	####		####	####	SYKVSTSGPR	2	P05787	K2C8_HUMAN	11	8	####		####	####	####	N/A	1	1	19	9991	4
WSLLQQQKTAR	7	P05787	K2C8_HUMAN	130	122	P05787_P05787	Docking	130:A	709	FLEQQNKMLETK	6	P05787	K2C8_HUMAN	117	110	P05787_P05787	Docking	117:B	596	22.66	Intra	1	1	19	21183	4
AKQDMAR	1	P05787	K2C8_HUMAN	364	362	P05787_P08729	Docking	364:A	2591	AEAEAWYQTKFETLQAQAGK	9	P08729	K2C7_HUMAN	286	276	P05787_P08729	Docking	286:B	####	####	2	1	1	2	23887	4
LQAEIEGLKGQR	8	P05787	K2C8_HUMAN	325	316	P05787_P08729	Docking	325:A	2304	LQAEIDNIKNQR	8	P08729	K2C7_HUMAN	326	317	P05787_P08729	Docking	326:B	134	21.39	2	4	1	2	19988	4
KGAGSVFR	0	P62917	RL8_HUMAN	10	9	P62917	Phyre	10:A	67	KLLEGEESR	0	P05787	K2C8_HUMAN	393	392	P05787	Phyre	393:A	2837	####	2	2	1	1	21736	4
MLIYDPAKR	7	P06493	CDK1_HUMAN	274	266	5LQF	Structure	274:D	7301	ISGKMALNHPYFNDLDNQIK	3	P06493	CDK1_HUMAN	279	275	5LQF	Structure	279:D	7339	13.38	Intra	3	1	1	23290	5
ADKLAEEHSS	2	P06576	ATPB_HUMAN	522	519	P06576_P25705	Docking	522:A	3509	ADGKISEQSDAK	3	P25705	ATPA_HUMAN	531	527	P06576_P25705	Docking	531:B	3535	24.17	1	2	1	2	10618	4
LVPLKETIK	4	P06576	ATPB_HUMAN	485	480	P06576_P25705	Docking	485:A	3218	ITKFENAFLSHVVSQHQALLGTIR	2	P25705	ATPA_HUMAN	506	503	P06576_P25705	Docking	506:B	3342	53.01	1	7	1	2	27879	5
WLITLNKQQR	6	P06730	IF4E_HUMAN	119	112	5T46	Structure	119:A	1544	AKGDKIAIWTTECENR	1	P06730	IF4E_HUMAN	159	157	5T46	Structure	159:A	2186	7.6	Intra	1	0.97	1	23653	4
AGAVEKGVPLYR	5	P06733	ENOA_HUMAN	126	120	2PSN	Structure	125:C	7534	VNQIGSVTESLQACKLAQANGWGVMVSHR	14	P06733	ENOA_HUMAN	358	343	2PSN	Structure	357:C	9312	22.59	Intra	1	1	28	25874	5
AVNEKSCNCLLLK	4	P06733	ENOA_HUMAN	335	330	2PSN	Structure	334:B	5847	VNQIGSVTESLQACKLAQANGWGVMVSHR	14	P06733	ENOA_HUMAN	358	343	2PSN	Structure	357:B	6014	16.5	Intra	1	1	28	26174	5
AVNEKSCNCLLLK	4	P06733	ENOA_HUMAN	335	330	2PSN	Structure	334:D	12453	YISPDQLADLYKSFIK	11	P06733	ENOA_HUMAN	281	269	2PSN	Structure	280:D	12028	18.2	Intra	12	1	28	35895	4
DNDKTR	3	P06733	ENOA_HUMAN	54	50	2PSN	Structure	53:D	10306	GVSKAVEHINK	3	P06733	ENOA_HUMAN	64	60	2PSN	Structure	63:D	10383	14.03	Intra	6	1	28	9213	4
DNDKTR	3	P06733	ENOA_HUMAN	54	50	2PSN	Structure	53:D	10306	TAIGKAGYTDK	4	P06733	ENOA_HUMAN	233	228	2PSN	Structure	232:D	11648	47.8	Intra	6	1	28	10371	4
DNDKTR	3	P06733	ENOA_HUMAN	54	50	2PSN	Structure	53:D	10306	YMGKGVSK	3	P06733	ENOA_HUMAN	60	56	2PSN	Structure	59:D	10357	7.7	Intra	5	1	28	9191	4
DNDKTR	3	P06733	ENOA_HUMAN	54	50	2PSN	Structure	53:D	10306	YM[147.04]GKGVSK	3	P06733	ENOA_HUMAN	60	56	2PSN	Structure	59:D	10357	7.7	Intra	7	1	28	7767	4
EGLELLKTAIGK	6	P06733	ENOA_HUMAN	228	221	2PSN	Structure	227:C	8307	YISPDQLADLYKSFIK	11	P06733	ENOA_HUMAN	281	269	2PSN	Structure	280:C	8720	16.84	Intra	5	1	28	39743	5
FTASAGIQVVGDDLTVTNPKR	19	P06733	ENOA_HUMAN	326	306	2PSN	Structure	325:D	12382	VNQIGSVTESLQACKLAQANGWGVMVSHR	14	P06733	ENOA_HUMAN	358	343	2PSN	Structure	357:D	12620	12.94	Intra	2	1	28	28255	4
IAKAVNEK	2	P06733	ENOA_HUMAN	330	327	2PSN	Structure	329:A	2511	SGKYDLDFK	2	P06733	ENOA_HUMAN	256	253	2PSN	Structure	255:A	1915	22.87	Intra	4	1	28	17165	4
IAKAVNEK	2	P06733	ENOA_HUMAN	330	327	2PSN	Structure	329:D	12415	VNQIGSVTESLQACKLAQANGWGVMVSHR	14	P06733	ENOA_HUMAN	358	343	2PSN	Structure	357:D	12620	14.92	Intra	1	1	28	23785	5
IAKAVNEK	2	P06733	ENOA_HUMAN	330	327	2PSN	Structure	329:D	12415	YISPDQLADLYKSFIK	11	P06733	ENOA_HUMAN	281	269	2PSN	Structure	280:D	12028	24.72	Intra	5	1	28	32696	4
LAKYNQLLR	2	P06733	ENOA_HUMAN	406	403	2PSN	Structure	405:D	12973	IGAEVYHNLKNVIK	9	P06733	ENOA_HUMAN	193	183	2PSN	Structure	192:D	11348	22.03	Intra	6	1	28	22336	5
NVIKEK	3	P06733	ENOA_HUMAN	197	193	2PSN	Structure	196:C	8072	DNDKTR	3	P06733	ENOA_HUMAN	54	50	2PSN	Structure	53:C	6998	38.98	Intra	4	1	28	8560	4
NVIKEK	3	P06733	ENOA_HUMAN	197	193	2PSN	Structure	196:D	11380	TAIGKAGYTDK	4	P06733	ENOA_HUMAN	233	228	2PSN	Structure	232:D	11648	13.82	Intra	3	1	28	12406	4
NVIKEK	3	P06733	ENOA_HUMAN	197	193	2PSN	Structure	196:C	8072	YMGKGVSK	3	P06733	ENOA_HUMAN	60	56	2PSN	Structure	59:C	7049	35.25	Intra	4	1	28	10949	4
NVIKEK	3	P06733	ENOA_HUMAN	197	193	2PSN	Structure	196:C	8072	YM[147.04]GKGVSK	3	P06733	ENOA_HUMAN	60	56	2PSN	Structure	59:C	7049	35.25	Intra	4	1	28	9434	4
SGKYDLDFK	2	P06733	ENOA_HUMAN	256	253	2PSN	Structure	255:A	1915	YISPDQLADLYKSFIK	11	P06733	ENOA_HUMAN	281	269	2PSN	Structure	280:A	2124	17.7	Intra	6	1	28	35721	4
SGKYDLDFKSPDDPSR	2	P06733	ENOA_HUMAN	256	253	2PSN	Structure	255:A	1915	YISPDQLADLYKSFIK	11	P06733	ENOA_HUMAN	281	269	2PSN	Structure	280:A	2124	17.7	Intra	3	1	28	33544	5
SKFGANAILGVSLAVCK	1	P06733	ENOA_HUMAN	105	103	2PSN	Structure	104:B	4096	AVEHINKTIAPALVSK	6	P06733	ENOA_HUMAN	71	64	2PSN	Structure	70:B	3833	13.09	Intra	1	1	28	26220	4
TAIGKAGYTDK	4	P06733	ENOA_HUMAN	233	228	2PSN	Structure	232:A	1744	IGAEVYHNLKNVIK	9	P06733	ENOA_HUMAN	193	183	2PSN	Structure	192:A	1444	11.17	Intra	4	1	28	19586	4
TIAPALVSKK	8	P06733	ENOA_HUMAN	80	71	2PSN	Structure	79:D	10501	IDKLMIEMDGTENK	2	P06733	ENOA_HUMAN	92	89	2PSN	Structure	91:D	10601	12.63	Intra	1	1	28	23973	4
TIAPALVSKK	8	P06733	ENOA_HUMAN	80	71	2PSN	Structure	79:D	10501	LNVTEQEKIDK	7	P06733	ENOA_HUMAN	89	81	2PSN	Structure	88:D	10576	10.54	Intra	6	1	28	18364	4
TIAPALVSKK	8	P06733	ENOA_HUMAN	80	71	2PSN	Structure	79:C	7193	SKFGANAILGVSLAVCK	1	P06733	ENOA_HUMAN	105	103	2PSN	Structure	104:C	7394	20.45	Intra	7	1	28	28457	4
TIAPALVSKK	8	P06733	ENOA_HUMAN	80	71	2PSN	Structure	79:D	10501	VNQIGSVTESLQACKLAQANGWGVMVSHR	14	P06733	ENOA_HUMAN	358	343	2PSN	Structure	357:D	12620	28.27	Intra	2	1	28	25833	5
YDLDFKSPDDPSR	5	P06733	ENOA_HUMAN	262	256	2PSN	Structure	261:B	5269	YISPDQLADLYKSFIK	11	P06733	ENOA_HUMAN	281	269	2PSN	Structure	280:B	5422	23.73	Intra	1	1	28	36112	4
YMGKGVSK	3	P06733	ENOA_HUMAN	60	56	2PSN	Structure	59:C	7049	TAIGKAGYTDK	4	P06733	ENOA_HUMAN	233	228	2PSN	Structure	232:C	8340	42.43	Intra	7	1	28	12442	4
YM[147.04]GKGVSK	3	P06733	ENOA_HUMAN	60	56	2PSN	Structure	59:C	7049	TAIGKAGYTDK	4	P06733	ENOA_HUMAN	233	228	2PSN	Structure	232:C	8340	42.43	Intra	1	1	28	11042	4
AKVTGPR	1	P21333	FLNA_HUMAN	2515	2513	4M9P	Structure	####	####	TAIGKAGYTDK	4	P06733	ENOA_HUMAN	233	228	2PSN	Structure	232:A	1744	####	1	1	0.87	1	12288	4
DKLDPVPAARCSASR	1	Q8NG27	PJA1_HUMAN	181	179	2L0B	Structure	####	####	YISPDQLADLYKSFIK	11	P06733	ENOA_HUMAN	281	269	2PSN	Structure	280:A	2124	####	2	1	0.87	1	35035	4
DPSAVAKHFVALSTNTTK	6	P06744	G6PI_HUMAN	241	234	1JIQ	Structure	241:D	15243	VKEFGIDPQNMFEFWDWVGGR	1	P06744	G6PI_HUMAN	254	252	1JIQ	Structure	254:D	15344	12.81	Intra	1	1	13	39193	4
LFDANKDR	5	P06744	G6PI_HUMAN	34	28	1JIQ	Structure	34:B	4739	DPQFQKLQQWYR	5	P06744	G6PI_HUMAN	12	6	1JIQ	Structure	12:B	4536	27.54	Intra	2	1	13	22583	4
MKSFCQR	1	P06744	G6PI_HUMAN	130	128	1JIQ	Structure	130:C	9954	SGDWKGYTGK	4	P06744	G6PI_HUMAN	142	137	1JIQ	Structure	142:C	10056	16.97	Intra	3	1	13	14359	4
MLVDLAKSR	6	P06744	G6PI_HUMAN	73	66	1JIQ	Structure	73:A	612	DPQFQKLQQWYR	5	P06744	G6PI_HUMAN	12	6	1JIQ	Structure	12:A	90	13.6	Intra	3	1	13	25154	4
M[147.04]KSFCQR	1	P06744	G6PI_HUMAN	130	128	1JIQ	Structure	130:C	9954	SGDWKGYTGK	4	P06744	G6PI_HUMAN	142	137	1JIQ	Structure	142:C	10056	16.97	Intra	2	1	13	13116	4
M[147.04]LVDLAKSR	6	P06744	G6PI_HUMAN	73	66	1JIQ	Structure	73:A	612	DPQFQKLQQWYR	5	P06744	G6PI_HUMAN	12	6	1JIQ	Structure	12:A	90	13.6	Intra	6	1	13	23731	4
SGDWKGYTGK	4	P06744	G6PI_HUMAN	142	137	1JIQ	Structure	142:A	1164	DPSAVAKHFVALSTNTTK	6	P06744	G6PI_HUMAN	241	234	1JIQ	Structure	241:A	1905	7.09	Intra	1	1	13	20799	4
YITKSGTR	3	P06744	G6PI_HUMAN	366	362	1JIQ	Structure	366:D	16266	DPQFQKLQQWYR	5	P06744	G6PI_HUMAN	12	6	1JIQ	Structure	12:D	13428	22.75	Intra	4	1	13	20760	4
YITKSGTR	3	P06744	G6PI_HUMAN	366	362	1JIQ	Structure	366:D	16266	ELQAAGKSPEDLER	6	P06744	G6PI_HUMAN	454	447	1JIQ	Structure	454:D	16954	61.95	Intra	1	1	13	14959	4
YITKSGTR	3	P06744	G6PI_HUMAN	366	362	1JIQ	Structure	366:A	2928	MFNGEKINYTEGR	5	P06744	G6PI_HUMAN	89	83	1JIQ	Structure	89:A	739	12.8	Intra	4	1	13	15426	4
YITKSGTR	3	P06744	G6PI_HUMAN	366	362	1JIQ	Structure	366:B	7374	MLVDLAKSR	6	P06744	G6PI_HUMAN	73	66	1JIQ	Structure	73:B	5058	17.77	Intra	5	1	13	17659	4
YITKSGTR	3	P06744	G6PI_HUMAN	366	362	1JIQ	Structure	366:A	2928	M[147.04]FNGEKINYTEGR	5	P06744	G6PI_HUMAN	89	83	1JIQ	Structure	89:A	739	12.8	Intra	3	1	13	14168	4
YITKSGTR	3	P06744	G6PI_HUMAN	366	362	1JIQ	Structure	366:B	7374	M[147.04]LVDLAKSR	6	P06744	G6PI_HUMAN	73	66	1JIQ	Structure	73:B	5058	17.77	Intra	5	1	13	15686	4
AKMQASIEK	1	P06748	NPM_HUMAN	250	248	####		####	####	TPKGPSSVEDIK	2	P06748	NPM_HUMAN	239	236	####		####	####	####	Intra	1	1	11	14536	4
AKMQASIEK	1	P06748	NPM_HUMAN	250	248	####		####	####	VEAKFINYVK	3	P06748	NPM_HUMAN	267	263	####		####	####	####	Intra	1	1	11	19777	4
DSKPSSTPR	2	P06748	NPM_HUMAN	215	212	####		####	####	NAQKSNQNGK	3	P06748	NPM_HUMAN	206	202	####		####	####	####	Intra	2	1	11	5763	4
DSKPSSTPR	2	P06748	NPM_HUMAN	215	212	5EHD	Structure	####	####	SNQNGKDSKPSSTPR	8	P06748	NPM_HUMAN	215	206	5EHD	Structure	####	####	####	1	1	1	11	5992	5
DTPAKNAQK	4	P06748	NPM_HUMAN	202	197	####		####	####	SNQNGKDSKPSSTPR	5	P06748	NPM_HUMAN	212	206	####		####	####	####	Intra	5	1	11	5491	5
LLSISGKR	6	P06748	NPM_HUMAN	141	134	5EHD	Structure	####	####	LLSISGKR	6	P06748	NPM_HUMAN	141	134	5EHD	Structure	####	####	####	1	4	1	11	18982	4
LLSISGKR	6	P06748	NPM_HUMAN	141	134	####		####	####	SAPGGGSKVPQK	7	P06748	NPM_HUMAN	150	142	####		####	####	####	Intra	4	1	11	14048	4
LLSISGKR	6	P06748	NPM_HUMAN	141	134	####		####	####	SAPGGGSKVPQKK	7	P06748	NPM_HUMAN	150	142	####		####	####	####	Intra	4	1	11	12403	5
SKGQESFK	1	P06748	NPM_HUMAN	223	221	####		####	####	DSKPSSTPR	2	P06748	NPM_HUMAN	215	212	####		####	####	####	Intra	2	1	11	9086	4
SKGQESFK	1	P06748	NPM_HUMAN	223	221	####		####	####	SNQNGKDSKPSSTPR	8	P06748	NPM_HUMAN	215	206	####		####	####	####	Intra	1	1	11	7460	5
VPQKK	3	P06748	NPM_HUMAN	154	150	####		####	####	LLSISGKR	6	P06748	NPM_HUMAN	141	134	####		####	####	####	Intra	3	1	11	13478	4
LLSISGKR	6	P06748	NPM_HUMAN	141	134	####		####	####	LWSKAIFAGYK	3	P18077	RL35A_HUMAN	8	4	####		####	####	####	1	1	0.97	1	24454	4
SVAKLEK	3	P06753	TPM3_HUMAN	249	245	P06753	Phyre	249:A	1994	LKEAETR	1	P06753	TPM3_HUMAN	234	232	P06753	Phyre	234:A	1876	22.54	Intra	3	1	1	10899	4
KVISYWR	0	P07099	HYEP_HUMAN	92	91	P07099	Phyre	92:A	519	KGFNSVATAR	0	P07099	HYEP_HUMAN	197	196	P07099	Phyre	197:A	1358	39.52	Intra	2	1	2	18188	4
KVISYWR	0	P07099	HYEP_HUMAN	92	91	P07099	Phyre	92:A	519	KQVEILNR	0	P07099	HYEP_HUMAN	105	104	P07099	Phyre	105:A	645	20.7	Intra	2	1	2	19307	4
AKWDAWNELK	1	P07108	ACBP_HUMAN	55	53	2CB8	Structure	55:B	1183	TKPSDEEMLFIYGHYK	1	P07108	ACBP_HUMAN	19	17	2CB8	Structure	19:B	891	16.38	Intra	2	1	1	26073	4
IVADKDYSVTANSK	4	P07195	LDHB_HUMAN	82	77	1I0Z	Structure	81:B	3142	NVNVFKFIIPQIVK	5	P07195	LDHB_HUMAN	119	113	1I0Z	Structure	118:B	3431	16.05	Intra	23	1	2	35157	4
LSGLPKHR	5	P07195	LDHB_HUMAN	156	150	1I0Z	Structure	155:B	3725	LKDDEVAQLKK	9	P07195	LDHB_HUMAN	318	308	1I0Z	Structure	317:B	4974	19.98	Intra	2	1	2	13235	5
SPVPKSPVEEAKSK	4	P07197	NFM_HUMAN	684	679	####		####	####	SPVPKSPVEEAKSK	4	P07197	NFM_HUMAN	684	679	####		####	####	####	N/A	4	0.98	1	35412	4
GYPTIKFFR	5	P07237	PDIA1_HUMAN	103	97	4EKZ	Structure	103:A	771	KSNFAEALAAHK	0	P07237	PDIA1_HUMAN	31	30	4EKZ	Structure	31:A	217	15.92	Intra	10	1	3	22958	4
GYPTIKFFR	5	P07237	PDIA1_HUMAN	103	97	4EKZ	Structure	103:A	771	NGDTASPKEYTAGR	7	P07237	PDIA1_HUMAN	114	106	4EKZ	Structure	114:A	858	5.43	Intra	7	1	3	22518	4
KSNFAEALAAHK	0	P07237	PDIA1_HUMAN	31	30	4EKZ	Structure	31:A	217	VHSFPTLKFFPASADR	7	P07237	PDIA1_HUMAN	444	436	4EKZ	Structure	444:A	3443	43.77	Intra	1	1	3	23318	5
DKVLIR	1	P07355	ANXA2_HUMAN	286	284	5LPU	Structure	286:A	2251	ELASALKSALSGHLETVILGLLK	6	P07355	ANXA2_HUMAN	88	81	5LPU	Structure	88:A	664	16.9	Intra	3	1	32	45620	4
DLYDAGVKR	7	P07355	ANXA2_HUMAN	204	196	5LPU	Structure	204:A	1563	KEVKGDLENAFLNLVQCIQNKPLYFADR	0	P07355	ANXA2_HUMAN	246	245	5LPU	Structure	246:A	1928	11.51	Intra	1	1	32	37866	5
DLYDAGVKR	7	P07355	ANXA2_HUMAN	204	196	5LPU	Structure	204:A	1563	YKSYSPYDMLESIR	1	P07355	ANXA2_HUMAN	233	231	5LPU	Structure	233:A	1812	12.94	Intra	1	1	32	27573	4
KGTDVPK	0	P07355	ANXA2_HUMAN	206	205	5LPU	Structure	206:B	4249	DLYDAGVKR	7	P07355	ANXA2_HUMAN	204	196	5LPU	Structure	204:B	4233	6.72	Intra	6	1	32	14118	4
KGTDVPK	0	P07355	ANXA2_HUMAN	206	205	5LPU	Structure	206:A	1583	EVKGDLENAFLNLVQCIQNKPLYFADR	2	P07355	ANXA2_HUMAN	249	246	5LPU	Structure	249:A	1953	14.82	Intra	5	1	32	38803	4
KGTDVPK	0	P07355	ANXA2_HUMAN	206	205	5LPU	Structure	206:A	1583	KEVKGDLENAFLNLVQCIQNKPLYFADR	0	P07355	ANXA2_HUMAN	246	245	5LPU	Structure	246:A	1928	11.35	Intra	1	1	32	35997	4
KGTDVPK	0	P07355	ANXA2_HUMAN	206	205	5LPU	Structure	206:A	1583	KEVKGDLENAFLNLVQCIQNKPLYFADR	3	P07355	ANXA2_HUMAN	249	245	5LPU	Structure	249:A	1953	14.82	Intra	1	1	32	35867	5
KGTDVPK	0	P07355	ANXA2_HUMAN	206	205	5LPU	Structure	206:A	1583	KLMVALAK	0	P07355	ANXA2_HUMAN	169	168	5LPU	Structure	169:A	1293	21.02	Intra	6	1	32	16750	4
KGTDVPK	0	P07355	ANXA2_HUMAN	206	205	5LPU	Structure	206:A	1583	KLM[147.04]VALAK	0	P07355	ANXA2_HUMAN	169	168	5LPU	Structure	169:A	1293	21.02	Intra	5	1	32	14738	4
KLMVALAK	0	P07355	ANXA2_HUMAN	169	168	5LPU	Structure	169:A	1293	DLYDAGVKR	7	P07355	ANXA2_HUMAN	204	196	5LPU	Structure	204:A	1563	22.72	Intra	3	1	32	21738	4
KLMVALAK	0	P07355	ANXA2_HUMAN	169	168	5LPU	Structure	169:A	1293	EVKGDLENAFLNLVQCIQNKPLYFADR	2	P07355	ANXA2_HUMAN	249	246	5LPU	Structure	249:A	1953	15.13	Intra	3	1	32	40775	5
KLMVALAK	0	P07355	ANXA2_HUMAN	169	168	5LPU	Structure	169:A	1293	KEVKGDLENAFLNLVQCIQNKPLYFADR	0	P07355	ANXA2_HUMAN	246	245	5LPU	Structure	246:A	1928	19.91	Intra	4	1	32	38083	5
KLMVALAK	0	P07355	ANXA2_HUMAN	169	168	5LPU	Structure	169:A	1293	KEVKGDLENAFLNLVQCIQNKPLYFADR	3	P07355	ANXA2_HUMAN	249	245	5LPU	Structure	249:A	1953	15.13	Intra	1	1	32	38089	5
KLMVALAK	0	P07355	ANXA2_HUMAN	169	168	5LPU	Structure	169:A	1293	TDLEKDIISDTSGDFR	4	P07355	ANXA2_HUMAN	157	152	5LPU	Structure	157:A	1199	11.93	Intra	4	1	32	26658	4
KLMVALAK	0	P07355	ANXA2_HUMAN	169	168	5LPU	Structure	169:A	1293	VYKEMYK	2	P07355	ANXA2_HUMAN	148	145	5LPU	Structure	148:A	1120	19.99	Intra	2	1	32	19821	4
KLMVALAK	0	P07355	ANXA2_HUMAN	169	168	5LPU	Structure	169:A	1293	YGKSLYYYIQQDTK	2	P07355	ANXA2_HUMAN	313	310	5LPU	Structure	313:A	2477	38.82	Intra	1	1	32	25944	4
KLM[147.04]VALAK	0	P07355	ANXA2_HUMAN	169	168	5LPU	Structure	169:A	1293	EVKGDLENAFLNLVQCIQNKPLYFADR	2	P07355	ANXA2_HUMAN	249	246	5LPU	Structure	249:A	1953	15.13	Intra	1	1	32	39765	5
KLM[147.04]VALAK	0	P07355	ANXA2_HUMAN	169	168	5LPU	Structure	169:A	1293	KEVKGDLENAFLNLVQCIQNKPLYFADR	0	P07355	ANXA2_HUMAN	246	245	5LPU	Structure	246:A	1928	19.91	Intra	1	1	32	37096	5
LYDSMKGK	5	P07355	ANXA2_HUMAN	279	273	5LPU	Structure	279:A	2199	KYGKSLYYYIQQDTK	0	P07355	ANXA2_HUMAN	310	309	5LPU	Structure	310:A	2452	13.56	Intra	1	1	32	19137	5
LYDSMKGK	5	P07355	ANXA2_HUMAN	279	273	5LPU	Structure	279:A	2199	KYGKSLYYYIQQDTK	3	P07355	ANXA2_HUMAN	313	309	5LPU	Structure	313:A	2477	12.28	Intra	9	1	32	19177	4
LYDSMKGK	5	P07355	ANXA2_HUMAN	279	273	5LPU	Structure	279:A	2199	YGKSLYYYIQQDTK	2	P07355	ANXA2_HUMAN	313	310	5LPU	Structure	313:A	2477	12.28	Intra	4	1	32	22837	4
LYDSM[147.04]KGK	5	P07355	ANXA2_HUMAN	279	273	5LPU	Structure	279:A	2199	KYGKSLYYYIQQDTK	3	P07355	ANXA2_HUMAN	313	309	5LPU	Structure	313:A	2477	12.28	Intra	3	1	32	18196	4
LYDSM[147.04]KGK	5	P07355	ANXA2_HUMAN	279	273	5LPU	Structure	279:A	2199	YGKSLYYYIQQDTK	2	P07355	ANXA2_HUMAN	313	310	5LPU	Structure	313:A	2477	12.28	Intra	2	1	32	21628	4
SEFKR	3	P07355	ANXA2_HUMAN	308	304	5LPU	Structure	308:B	5081	SEVDMLKIR	6	P07355	ANXA2_HUMAN	302	295	5LPU	Structure	302:B	5027	9.79	Intra	1	1	32	18355	4
SEVDMLKIR	6	P07355	ANXA2_HUMAN	302	295	5LPU	Structure	302:A	2378	SVPHLQKVFDR	6	P07355	ANXA2_HUMAN	227	220	5LPU	Structure	227:A	1749	21.18	Intra	4	1	32	21244	4
SEVDMLKIR	6	P07355	ANXA2_HUMAN	302	295	5LPU	Structure	302:B	5027	YKSYSPYDMLESIR	1	P07355	ANXA2_HUMAN	233	231	5LPU	Structure	233:B	4477	26.12	Intra	3	1	32	29578	4
SEVDM[147.04]LKIR	6	P07355	ANXA2_HUMAN	302	295	5LPU	Structure	302:A	2378	SVPHLQKVFDR	6	P07355	ANXA2_HUMAN	227	220	5LPU	Structure	227:A	1749	21.18	Intra	4	1	32	19209	5
SVPHLQKVFDR	6	P07355	ANXA2_HUMAN	227	220	5LPU	Structure	227:B	4414	YKSYSPYDMLESIR	1	P07355	ANXA2_HUMAN	233	231	5LPU	Structure	233:B	4477	10.19	Intra	10	1	32	25674	4
TPAQYDASELKASMK	10	P07355	ANXA2_HUMAN	115	104	5LPU	Structure	115:B	3564	ELASALKSALSGHLETVILGLLK	6	P07355	ANXA2_HUMAN	88	81	5LPU	Structure	88:B	3364	18.69	Intra	5	1	32	44081	5
YGKSLYYYIQQDTK	2	P07355	ANXA2_HUMAN	313	310	5LPU	Structure	313:B	5122	YKSYSPYDMLESIRK	1	P07355	ANXA2_HUMAN	233	231	5LPU	Structure	233:B	4477	31.05	Intra	1	1	32	26482	4
YKSYSPYDMLESIR	1	P07355	ANXA2_HUMAN	233	231	5LPU	Structure	233:B	4477	KYGKSLYYYIQQDTK	3	P07355	ANXA2_HUMAN	313	309	5LPU	Structure	313:B	5122	31.05	Intra	1	1	32	26482	4
YKSYSPYDMLESIR	1	P07355	ANXA2_HUMAN	233	231	5LPU	Structure	233:B	4477	YGKSLYYYIQQDTK	2	P07355	ANXA2_HUMAN	313	310	5LPU	Structure	313:B	5122	31.05	Intra	2	1	32	30230	4
KELASALK	0	P07355	ANXA2_HUMAN	81	80	5LPU	Structure	81:A	614	IVGCSVHKGFAFVQYVNER	7	P07910	HNRPC_HUMAN	50	42	2MZ1	Structure	50:A	747	####	2	2	0.94	2	21190	4
KELASALK	0	P07355	ANXA2_HUMAN	81	80	5LPU	Structure	81:A	614	LKGDDLQAIK	1	P07910	HNRPC_HUMAN	189	187	2MZ1	Structure	####	####	####	2	2	1	2	17746	4
KWNTTLYEGTWR	0	P07384	CAN1_HUMAN	365	364	P07384	Phyre	365:A	2459	GHAYSVTGAKQVNYR	9	P07384	CAN1_HUMAN	280	270	P07384	Phyre	280:A	1970	19.86	Intra	1	1	2	18332	5
KWNTTLYEGTWR	0	P07384	CAN1_HUMAN	365	364	P07384	Phyre	365:A	2459	LEICNLTPDALKSR	11	P07384	CAN1_HUMAN	359	347	P07384	Phyre	359:A	2407	10.53	Intra	3	1	2	27424	4
ISVYYNEATGGKYVPR	11	P07437	TBB5_HUMAN	58	46	5N5N	Structure	60:A	23837	KEAESCDCLQGFQLTHSLGGGTGSGMGTLLISK	0	P07437	TBB5_HUMAN	122	121	5N5N	Structure	124:A	24330	19.37	Intra	1	1	4	27308	5
ISVYYNEATGGKYVPR	11	P07437	TBB5_HUMAN	58	46	5N5N	Structure	60:A	23837	KEAESCDCLQGFQLTHSLGGGTGSGMGTLLISKIR	32	P07437	TBB5_HUMAN	154	121	5N5N	Structure	156:A	24550	32.31	Intra	2	1	4	27428	5
ISVYYNEATGGKYVPR	11	P07437	TBB5_HUMAN	58	46	5N5N	Structure	60:A	23837	SGPFGQIFRPDNFVFGQSGAGNNWAKGHYTEGAELVDSVLDVVR	25	P07437	TBB5_HUMAN	103	77	5N5N	Structure	105:A	24184	39.61	Intra	1	1	4	37127	5
ISVYYNEATGGKYVPR	11	P07437	TBB5_HUMAN	58	46	5N5N	Structure	60:A	23837	TLKLTTPTYGDLNHLVSATMSGVTTCLR	2	P07437	TBB5_HUMAN	216	213	5N5N	Structure	218:A	25053	39.36	Intra	2	1	4	33192	5
YKLLGGLAVR	1	P23396	RS3_HUMAN	108	106	1WH9	Structure	####	####	ISVYYNEATGGKYVPR	11	P07437	TBB5_HUMAN	58	46	5N5N	Structure	60:A	23837	####	1	3	1	1	25523	4
ISVYYNEATGGKYVPR	11	P07437	TBB5_HUMAN	58	46	P07437	Phyre	58:A	436	VELCSFSGYKIYPGHGR	9	P83731	RL24_HUMAN	12	2	P83731	Phyre	12:A	88	####	1	1	0.95	1	21618	5
TKSTGGAPTFNVTVTK	1	P07737	PROF1_HUMAN	91	89	4X1L	Structure	91:A	574	SSFYVNGLTLGGQKCSVIR	13	P07737	PROF1_HUMAN	70	56	4X1L	Structure	70:A	441	5.41	Intra	5	1	1	25363	4
AALLNQHYQVNFKGK	12	P07814	SYEP_HUMAN	229	216	P07814	Phyre	229:A	452	GMTVEGLKQFIAAQGSSR	7	P07814	SYEP_HUMAN	472	464	P07814	Phyre	472:A	2602	18.47	Intra	3	1	5	26971	4
AYVDDTPAEQMKAER	11	P07814	SYEP_HUMAN	300	288	P07814	Phyre	300:A	1087	KLTWFVNEGLVDGWDDPRFPTVR	0	P07814	SYEP_HUMAN	437	436	P07814	Phyre	437:A	2304	29.48	Intra	9	1	5	29928	4
AYVDDTPAEQM[147.04]KAER	11	P07814	SYEP_HUMAN	300	288	P07814	Phyre	300:A	1087	KLTWFVNEGLVDGWDDPRFPTVR	0	P07814	SYEP_HUMAN	437	436	P07814	Phyre	437:A	2304	29.48	Intra	3	1	5	28983	5
LNLNNTVLSKR	9	P07814	SYEP_HUMAN	435	425	P07814	Phyre	435:A	2284	KLTWFVNEGLVDGWDDPRFPTVR	0	P07814	SYEP_HUMAN	437	436	P07814	Phyre	437:A	2304	5.61	Intra	1	1	5	31773	5
WDVSTTKAR	6	P07814	SYEP_HUMAN	173	166	####		####	####	KPYIWEYSR	0	P07814	SYEP_HUMAN	417	416	P07814	Phyre	417:A	2105	####	Intra	2	1	5	20159	4
DILEKK	4	P07900	HS90A_HUMAN	581	576	P07900	Phyre	581:A	5075	VEKVVVSNR	2	P07900	HS90A_HUMAN	585	582	P07900	Phyre	585:A	5115	9.76	Intra	2	1	30	16201	4
ELHINLIPNKQDR	9	P07900	HS90A_HUMAN	84	74	P07900	Phyre	84:A	697	HSQFIGYPITLFVEKER	14	P07900	HS90A_HUMAN	224	209	P07900	Phyre	224:A	2010	13.6	Intra	1	1	30	28315	5
ELHINLIPNKQDR	9	P07900	HS90A_HUMAN	84	74	P07900	Phyre	84:A	697	KHSQFIGYPITLFVEK	0	P07900	HS90A_HUMAN	209	208	P07900	Phyre	209:A	1857	23.08	Intra	2	1	30	27862	5
ELISNSSDALDKIR	11	P07900	HS90A_HUMAN	58	46	P07900	Phyre	58:A	441	ADLINNLGTIAKSGTK	11	P07900	HS90A_HUMAN	112	100	P07900	Phyre	112:A	972	16.82	Intra	3	1	30	26075	4
FYEQFSKNIK	6	P07900	HS90A_HUMAN	443	436	3Q6M	Structure	443:B	4187	FYEQFSKNIK	6	P07900	HS90A_HUMAN	443	436	3Q6M	Structure	443:A	1117	36.47	1	3	1	30	21399	4
GTKVILHLK	2	P07900	HS90A_HUMAN	185	182	P07900	Phyre	185:A	1603	HSQFIGYPITLFVEKER	14	P07900	HS90A_HUMAN	224	209	P07900	Phyre	224:A	2010	22.65	Intra	8	1	30	26553	4
GTKVILHLK	2	P07900	HS90A_HUMAN	185	182	P07900	Phyre	185:A	1603	LDSGKELHINLIPNK	4	P07900	HS90A_HUMAN	74	69	P07900	Phyre	74:A	590	17.13	Intra	3	1	30	21271	4
GTKVILHLK	2	P07900	HS90A_HUMAN	185	182	P07900	Phyre	185:A	1603	LDSGKELHINLIPNKQDR	4	P07900	HS90A_HUMAN	74	69	P07900	Phyre	74:A	590	17.13	Intra	5	1	30	19727	4
HSQFIGYPITLFVEKER	14	P07900	HS90A_HUMAN	224	209	3Q6M	Structure	####	####	HSQFIGYPITLFVEKER	14	P07900	HS90A_HUMAN	224	209	3Q6M	Structure	####	####	####	1	1	0.99	30	27848	5
IKEIVK	1	P07900	HS90A_HUMAN	204	202	P07900	Phyre	204:A	1809	GTKVILHLK	2	P07900	HS90A_HUMAN	185	182	P07900	Phyre	185:A	1603	20.34	Intra	2	1	30	17084	5
IKEIVK	1	P07900	HS90A_HUMAN	204	202	P07900	Phyre	204:A	1809	HSQFIGYPITLFVEKER	14	P07900	HS90A_HUMAN	224	209	P07900	Phyre	224:A	2010	14.76	Intra	3	1	30	26862	4
IKEIVK	1	P07900	HS90A_HUMAN	204	202	P07900	Phyre	204:A	1809	KHSQFIGYPITLFVEK	0	P07900	HS90A_HUMAN	209	208	P07900	Phyre	209:A	1857	8.57	Intra	9	1	30	26225	4
IKEIVK	1	P07900	HS90A_HUMAN	204	202	P07900	Phyre	204:A	1809	TKPIWTR	1	P07900	HS90A_HUMAN	294	292	P07900	Phyre	294:A	2247	16.9	Intra	3	1	30	17022	4
IKEIVKK	5	P07900	HS90A_HUMAN	208	202	P07900	Phyre	208:A	1848	HSQFIGYPITLFVEKER	14	P07900	HS90A_HUMAN	224	209	P07900	Phyre	224:A	2010	19.73	Intra	1	1	30	23564	4
IMKAQALR	2	P07900	HS90A_HUMAN	615	612	3Q6M	Structure	615:A	2522	FYEQFSKNIK	6	P07900	HS90A_HUMAN	443	436	3Q6M	Structure	443:A	1117	19.65	Intra	3	1	30	18392	4
IMKAQALR	2	P07900	HS90A_HUMAN	615	612	3Q6M	Structure	615:B	5592	KHLEINPDHSIIETLR	0	P07900	HS90A_HUMAN	632	631	3Q6M	Structure	632:B	5615	19.62	Intra	1	1	30	19542	5
IMKAQALR	2	P07900	HS90A_HUMAN	615	612	3Q6M	Structure	615:B	5592	VEKVVVSNR	2	P07900	HS90A_HUMAN	585	582	3Q6M	Structure	585:B	5361	26.84	Intra	1	1	30	15072	4
IM[147.04]KAQALR	2	P07900	HS90A_HUMAN	615	612	3Q6M	Structure	615:A	2522	FYEQFSKNIK	6	P07900	HS90A_HUMAN	443	436	3Q6M	Structure	443:A	1117	19.65	Intra	5	1	30	17253	4
KHSQFIGYPITLFVEK	0	P07900	HS90A_HUMAN	209	208	P07900	Phyre	209:A	1857	YIDQEELNKTKPIWTR	8	P07900	HS90A_HUMAN	292	283	P07900	Phyre	292:A	2228	13.84	Intra	5	1	30	27525	5
KKNNIK	0	P07900	HS90A_HUMAN	357	356	P07900	Phyre	357:A	2870	KHSQFIGYPITLFVEK	0	P07900	HS90A_HUMAN	209	208	P07900	Phyre	209:A	1857	15.97	Intra	1	1	30	21985	5
KNNIK	0	P07900	HS90A_HUMAN	358	357	P07900	Phyre	358:A	2879	FYEQFSKNIK	6	P07900	HS90A_HUMAN	443	436	P07900	Phyre	443:A	3768	17.81	Intra	7	1	30	15134	4
KNNIK	0	P07900	HS90A_HUMAN	358	357	P07900	Phyre	358:A	2879	KHSQFIGYPITLFVEK	0	P07900	HS90A_HUMAN	209	208	P07900	Phyre	209:A	1857	15.17	Intra	5	1	30	24139	4
LDSGKELHINLIPNK	4	P07900	HS90A_HUMAN	74	69	P07900	Phyre	74:A	590	HSQFIGYPITLFVEKER	14	P07900	HS90A_HUMAN	224	209	P07900	Phyre	224:A	2010	27.97	Intra	2	1	30	29480	5
NNIKLYVR	3	P07900	HS90A_HUMAN	362	358	P07900	Phyre	362:A	2924	KHSQFIGYPITLFVEK	0	P07900	HS90A_HUMAN	209	208	P07900	Phyre	209:A	1857	10.54	Intra	13	1	30	27906	4
RIKEIVK	2	P07900	HS90A_HUMAN	204	201	P07900	Phyre	204:A	1809	KHSQFIGYPITLFVEK	0	P07900	HS90A_HUMAN	209	208	P07900	Phyre	209:A	1857	8.57	Intra	3	1	30	23462	5
TKPIWTR	1	P07900	HS90A_HUMAN	294	292	P07900	Phyre	294:A	2247	HSQFIGYPITLFVEKER	14	P07900	HS90A_HUMAN	224	209	P07900	Phyre	224:A	2010	25.82	Intra	4	1	30	28221	5
TKPIWTR	1	P07900	HS90A_HUMAN	294	292	P07900	Phyre	294:A	2247	KHSQFIGYPITLFVEK	0	P07900	HS90A_HUMAN	209	208	P07900	Phyre	209:A	1857	14.09	Intra	12	1	30	27551	4
TKPIWTR	1	P07900	HS90A_HUMAN	294	292	P07900	Phyre	294:A	2247	LDSGKELHINLIPNK	4	P07900	HS90A_HUMAN	74	69	P07900	Phyre	74:A	590	20.93	Intra	2	1	30	21777	5
TKPIWTR	1	P07900	HS90A_HUMAN	294	292	P07900	Phyre	294:A	2247	LDSGKELHINLIPNKQDR	4	P07900	HS90A_HUMAN	74	69	P07900	Phyre	74:A	590	20.93	Intra	1	1	30	19720	6
TKPIWTR	1	P07900	HS90A_HUMAN	294	292	P07900	Phyre	294:A	2247	YESLTDPSKLDSGKELHINLIPNK	13	P07900	HS90A_HUMAN	74	60	P07900	Phyre	74:A	590	20.93	Intra	2	1	30	22997	5
FYEAFSKNLK	6	P08238	HS90B_HUMAN	435	428	3PRY	Structure	435:A	1183	FYEQFSKNIK	6	P07900	HS90A_HUMAN	443	436	3Q6M	Structure	443:A	1117	####	1	2	1	2	22441	4
FYEQFSKNIK	6	P07900	HS90A_HUMAN	443	436	3Q6M	Structure	443:A	1117	KHLEINPDHPIVETLR	0	P08238	HS90B_HUMAN	624	623	3PRY	Structure	####	####	####	1	2	1	2	19550	5
AVVPSKR	5	P07910	HNRPC_HUMAN	157	151	2MZ1	Structure	####	####	AVVPSKR	5	P07910	HNRPC_HUMAN	157	151	2MZ1	Structure	####	####	####	1	3	1	17	11698	4
AVVPSKR	5	P07910	HNRPC_HUMAN	157	151	####		####	####	GKSGFNSK	1	P07910	HNRPC_HUMAN	170	168	####		####	####	####	Intra	2	1	17	10625	4
AVVPSKR	5	P07910	HNRPC_HUMAN	157	151	####		####	####	IVGCSVHKGFAFVQYVNER	7	P07910	HNRPC_HUMAN	50	42	P07910	Phyre	50:A	435	####	Intra	7	1	17	19947	5
AVVPSKR	5	P07910	HNRPC_HUMAN	157	151	####		####	####	KELTQIK	0	P07910	HNRPC_HUMAN	198	197	####		####	####	####	Intra	2	1	17	13499	4
AVVPSKR	5	P07910	HNRPC_HUMAN	157	151	####		####	####	RGKSGFNSK	2	P07910	HNRPC_HUMAN	170	167	####		####	####	####	Intra	3	1	17	9189	5
AVVPSKR	5	P07910	HNRPC_HUMAN	157	151	####		####	####	SGFNSKSGQR	5	P07910	HNRPC_HUMAN	176	170	####		####	####	####	Intra	2	1	17	10723	4
AVVPSKR	5	P07910	HNRPC_HUMAN	157	151	####		####	####	YGKIVGCSVHK	2	P07910	HNRPC_HUMAN	42	39	P07910	Phyre	42:A	372	####	Intra	11	1	17	12245	5
GKSGFNSK	1	P07910	HNRPC_HUMAN	170	168	####		####	####	YGKIVGCSVHK	2	P07910	HNRPC_HUMAN	42	39	P07910	Phyre	42:A	372	####	Intra	2	1	17	11290	5
IVGCSVHKGFAFVQYVNER	7	P07910	HNRPC_HUMAN	50	42	2MZ1	Structure	####	####	IVGCSVHKGFAFVQYVNER	7	P07910	HNRPC_HUMAN	50	42	2MZ1	Structure	####	####	####	1	1	1	17	23818	5
KELTQIK	0	P07910	HNRPC_HUMAN	198	197	####		####	####	IVGCSVHKGFAFVQYVNER	7	P07910	HNRPC_HUMAN	50	42	P07910	Phyre	50:A	435	####	Intra	1	1	17	21081	4
KELTQIK	0	P07910	HNRPC_HUMAN	198	197	####		####	####	YGKIVGCSVHK	2	P07910	HNRPC_HUMAN	42	39	P07910	Phyre	42:A	372	####	Intra	2	1	17	13738	5
KSDVEAIFSK	0	P07910	HNRPC_HUMAN	30	29	2MZ1	Structure	30:A	442	IVGCSVHKGFAFVQYVNER	7	P07910	HNRPC_HUMAN	50	42	2MZ1	Structure	50:A	747	11.4	Intra	3	1	17	24000	4
KSDVEAIFSK	0	P07910	HNRPC_HUMAN	30	29	2MZ1	Structure	30:A	442	YGKIVGCSVHK	2	P07910	HNRPC_HUMAN	42	39	2MZ1	Structure	42:A	628	14.82	Intra	6	1	17	17572	5
SGFNSKSGQR	5	P07910	HNRPC_HUMAN	176	170	####		####	####	IVGCSVHKGFAFVQYVNER	7	P07910	HNRPC_HUMAN	50	42	P07910	Phyre	50:A	435	####	Intra	2	1	17	19493	5
SGFNSKSGQR	5	P07910	HNRPC_HUMAN	176	170	####		####	####	YGKIVGCSVHK	2	P07910	HNRPC_HUMAN	42	39	P07910	Phyre	42:A	372	####	Intra	4	1	17	11285	5
VFIGNLNTLVVKK	11	P07910	HNRPC_HUMAN	29	17	2MZ1	Structure	29:A	420	IVGCSVHKGFAFVQYVNER	7	P07910	HNRPC_HUMAN	50	42	2MZ1	Structure	50:A	747	10.03	Intra	1	1	17	27215	4
YGKIVGCSVHK	2	P07910	HNRPC_HUMAN	42	39	2MZ1	Structure	####	####	YGKIVGCSVHK	2	P07910	HNRPC_HUMAN	42	39	2MZ1	Structure	####	####	####	1	6	1	17	13278	4
YGKIVGCSVHK	2	P07910	HNRPC_HUMAN	42	39	2MZ1	Structure	42:A	628	SSGPYGGGGQYFAKPR	13	P09651	ROA1_HUMAN	350	336	1L3K	Structure	####	####	####	1	3	1	1	15438	5
VVEPKR	4	P22626	ROA2_HUMAN	94	89	P07910_P22626	Docking	94:B	693	YGKIVGCSVHK	2	P07910	HNRPC_HUMAN	42	39	P07910_P22626	Docking	42:A	372	18.28	1	1	0.89	1	11214	5
AVVPSKR	5	P07910	HNRPC_HUMAN	157	151	2MZ1	Structure	####	####	VAGCSVHKGYAFVQYSNER	7	Q9UKM9	RALY_HUMAN	55	47	1WF1	Structure	62:A	906	####	1	2	0.84	1	15269	5
KYEEVAR	0	P07951	TPM2_HUMAN	161	160	P07951	Phyre	161:A	1290	KLVILEGELER	0	P07951	TPM2_HUMAN	168	167	P07951	Phyre	168:A	1352	10.67	Intra	2	1	1	22140	4
IKAAMPR	1	P07954	FUMH_HUMAN	263	261	30000	Structure	263:C	8362	IKAAMPR	1	P07954	FUMH_HUMAN	263	261	30000	Structure	263:B	4988	14.46	1	1	1	2	14317	4
MPTPVIKAFGILK	6	P07954	FUMH_HUMAN	94	87	30000	Structure	94:B	3695	STMNFKIGGVTER	5	P07954	FUMH_HUMAN	80	74	30000	Structure	80:B	3596	22.36	Intra	2	1	2	32049	4
ELPAQKWWHTGALYR	5	P08195	4F2_HUMAN	217	211	2DH2	Structure	116:A	50	IGDLQAFQGHGAGNLAGLKGR	18	P08195	4F2_HUMAN	245	226	2DH2	Structure	144:A	266	24.04	Intra	2	1	3	24030	6
LKLEPHEGLLLR	1	P08195	4F2_HUMAN	615	613	2DH2	Structure	####	####	LKLEPHEGLLLR	1	P08195	4F2_HUMAN	615	613	2DH2	Structure	####	####	####	N/A	1	1	3	23717	6
VKGLVLGPIHK	1	P08195	4F2_HUMAN	257	255	2DH2	Structure	156:A	362	ELPAQKWWHTGALYR	5	P08195	4F2_HUMAN	217	211	2DH2	Structure	116:A	50	10.65	Intra	10	1	3	23546	5
IKESYR	1	P08237	PFKAM_HUMAN	692	690	4OMT	Structure	692:A	5181	SFMNNWEVYKLLAHVRPPVSK	9	P08237	PFKAM_HUMAN	386	376	4OMT	Structure	386:A	2869	25.45	Intra	1	1	1	27212	6
ADLINNLGTIAKSGTK	11	P08238	HS90B_HUMAN	107	95	P08238	Phyre	107:A	983	KHSQFIGYPITLYLEK	0	P08238	HS90B_HUMAN	204	203	P08238	Phyre	204:A	1893	26.8	Intra	1	1	55	29119	5
APFDLFENKK	8	P08238	HS90B_HUMAN	347	338	P08238	Phyre	347:A	2916	FYEAFSKNLK	6	P08238	HS90B_HUMAN	435	428	P08238	Phyre	435:A	3832	17.89	Intra	2	1	55	26468	4
APFDLFENKK	8	P08238	HS90B_HUMAN	347	338	P08238	Phyre	347:A	2916	KHSQFIGYPITLYLEK	0	P08238	HS90B_HUMAN	204	203	P08238	Phyre	204:A	1893	22.15	Intra	10	1	55	30341	4
ELISNASDALDKIR	11	P08238	HS90B_HUMAN	53	41	P08238	Phyre	53:A	440	ADLINNLGTIAKSGTK	11	P08238	HS90B_HUMAN	107	95	P08238	Phyre	107:A	983	16.82	Intra	4	1	55	27192	4
EMLQQSKILK	6	P08238	HS90B_HUMAN	399	392	P08238	Phyre	399:A	3461	KHSQFIGYPITLYLEK	0	P08238	HS90B_HUMAN	204	203	P08238	Phyre	204:A	1893	25.2	Intra	2	1	55	26488	5
FYEAFSKNLK	6	P08238	HS90B_HUMAN	435	428	3PRY	Structure	435:C	5247	FYEAFSKNLK	6	P08238	HS90B_HUMAN	435	428	3PRY	Structure	435:A	1183	28.74	1	2	1	55	23686	4
FYEAFSKNLK	6	P08238	HS90B_HUMAN	435	428	P08238	Phyre	435:A	3832	KHSQFIGYPITLYLEK	0	P08238	HS90B_HUMAN	204	203	P08238	Phyre	204:A	1893	30.91	Intra	2	1	55	27533	5
FYEAFSKNLK	6	P08238	HS90B_HUMAN	435	428	P08238	Phyre	435:A	3832	RAPFDLFENKK	9	P08238	HS90B_HUMAN	347	337	P08238	Phyre	347:A	2916	17.89	Intra	13	1	55	22924	5
GTKVILHLK	2	P08238	HS90B_HUMAN	180	177	P08238	Phyre	180:A	1629	EKYIDQEELNK	1	P08238	HS90B_HUMAN	275	273	P08238	Phyre	275:A	2184	23.03	Intra	5	1	55	17748	5
GTKVILHLK	2	P08238	HS90B_HUMAN	180	177	P08238	Phyre	180:A	1629	HSQFIGYPITLYLEKER	14	P08238	HS90B_HUMAN	219	204	P08238	Phyre	219:A	2054	22.65	Intra	5	1	55	25505	4
GTKVILHLK	2	P08238	HS90B_HUMAN	180	177	P08238	Phyre	180:A	1629	IKEKYIDQEELNK	3	P08238	HS90B_HUMAN	275	271	P08238	Phyre	275:A	2184	23.03	Intra	6	1	55	16167	5
GTKVILHLK	2	P08238	HS90B_HUMAN	180	177	P08238	Phyre	180:A	1629	KHSQFIGYPITLYLEKER	15	P08238	HS90B_HUMAN	219	203	P08238	Phyre	219:A	2054	22.65	Intra	1	1	55	23566	5
GTKVILHLK	2	P08238	HS90B_HUMAN	180	177	P08238	Phyre	180:A	1629	YESLTDPSKLDSGKELK	13	P08238	HS90B_HUMAN	69	55	P08238	Phyre	69:A	589	17.13	Intra	3	1	55	18415	4
GTKVILHLK	2	P08238	HS90B_HUMAN	180	177	P08238	Phyre	180:A	1629	YIDQEELNKTKPIWTR	8	P08238	HS90B_HUMAN	284	275	P08238	Phyre	284:A	2282	23.97	Intra	4	1	55	19823	5
HSQFIGYPITLYLEKER	14	P08238	HS90B_HUMAN	219	204	P08238_P08238	Docking	219:A	2054	HSQFIGYPITLYLEKER	14	P08238	HS90B_HUMAN	219	204	P08238_P08238	Docking	219:B	2054	34.33	1	1	1	55	23639	5
IMKAQALR	2	P08238	HS90B_HUMAN	607	604	P08238	Phyre	607:A	5508	FYEAFSKNLK	6	P08238	HS90B_HUMAN	435	428	P08238	Phyre	435:A	3832	20.38	Intra	6	1	55	19636	4
IMKAQALR	2	P08238	HS90B_HUMAN	607	604	P08238_P08238	Docking	607:A	5508	IMKAQALR	2	P08238	HS90B_HUMAN	607	604	P08238_P08238	Docking	607:B	5508	12.57	1	3	1	55	16417	4
IMKAQALR	2	P08238	HS90B_HUMAN	607	604	P08238	Phyre	607:A	5508	KHLEINPDHPIVETLR	0	P08238	HS90B_HUMAN	624	623	P08238	Phyre	624:A	5651	16.24	Intra	1	1	55	18208	6
IMKAQALR	2	P08238	HS90B_HUMAN	607	604	P08238	Phyre	607:A	5508	KHSQFIGYPITLYLEK	0	P08238	HS90B_HUMAN	204	203	P08238	Phyre	204:A	1893	44.26	Intra	1	1	55	25147	5
IM[147.04]KAQALR	2	P08238	HS90B_HUMAN	607	604	P08238	Phyre	607:A	5508	FYEAFSKNLK	6	P08238	HS90B_HUMAN	435	428	P08238	Phyre	435:A	3832	20.38	Intra	3	1	55	18416	4
IM[147.04]KAQALR	2	P08238	HS90B_HUMAN	607	604	P08238_P08238	Docking	607:A	5508	IMKAQALR	2	P08238	HS90B_HUMAN	607	604	P08238_P08238	Docking	607:B	5508	12.57	1	1	1	55	15169	4
IM[147.04]KAQALR	2	P08238	HS90B_HUMAN	607	604	P08238	Phyre	607:A	5508	KHLEINPDHPIVETLR	0	P08238	HS90B_HUMAN	624	623	P08238	Phyre	624:A	5651	16.24	Intra	2	1	55	17335	6
IM[147.04]KAQALR	2	P08238	HS90B_HUMAN	607	604	P08238	Phyre	607:A	5508	VEKVTISNR	2	P08238	HS90B_HUMAN	577	574	P08238	Phyre	577:A	5213	23.75	Intra	2	1	55	14023	4
KHSQFIGYPITLYLEK	0	P08238	HS90B_HUMAN	204	203	P08238	Phyre	204:A	1893	NPDDITQEEYGEFYKSLTNDWEDHLAVK	14	P08238	HS90B_HUMAN	306	291	P08238	Phyre	306:A	2504	16.53	Intra	1	1	55	34163	5
KHSQFIGYPITLYLEK	0	P08238	HS90B_HUMAN	204	203	P08238	Phyre	204:A	1893	YIDQEELNKTKPIWTR	8	P08238	HS90B_HUMAN	284	275	P08238	Phyre	284:A	2282	13.84	Intra	18	1	55	26405	4
KKNNIK	0	P08238	HS90B_HUMAN	349	348	P08238	Phyre	349:A	2934	KHSQFIGYPITLYLEK	0	P08238	HS90B_HUMAN	204	203	P08238	Phyre	204:A	1893	15.97	Intra	2	1	55	20920	5
KNIVK	0	P08238	HS90B_HUMAN	406	405	P08238	Phyre	406:A	3549	EMLQQSKILK	6	P08238	HS90B_HUMAN	399	392	P08238	Phyre	399:A	3461	11.02	Intra	3	1	55	15974	4
KNIVK	0	P08238	HS90B_HUMAN	406	405	P08238	Phyre	406:A	3549	EM[147.04]LQQSKILK	6	P08238	HS90B_HUMAN	399	392	P08238	Phyre	399:A	3461	11.02	Intra	1	1	55	14653	4
KNIVK	0	P08238	HS90B_HUMAN	406	405	P08238	Phyre	406:A	3549	ILKVIR	2	P08238	HS90B_HUMAN	402	399	P08238	Phyre	402:A	3500	6.47	Intra	3	1	55	16039	4
KNNIK	0	P08238	HS90B_HUMAN	350	349	3PRY	Structure	350:A	490	FYEAFSKNLK	6	P08238	HS90B_HUMAN	435	428	3PRY	Structure	435:A	1183	16.04	Intra	6	1	55	16454	4
KNNIK	0	P08238	HS90B_HUMAN	350	349	P08238	Phyre	350:A	2943	KHSQFIGYPITLYLEK	0	P08238	HS90B_HUMAN	204	203	P08238	Phyre	204:A	1893	15.17	Intra	10	1	55	23115	5
KNNIKLYVR	4	P08238	HS90B_HUMAN	354	349	P08238	Phyre	354:A	2988	KHSQFIGYPITLYLEK	0	P08238	HS90B_HUMAN	204	203	P08238	Phyre	204:A	1893	10.54	Intra	3	1	55	23767	4
LDSGKELK	4	P08238	HS90B_HUMAN	69	64	P08238	Phyre	69:A	589	GTKVILHLK	2	P08238	HS90B_HUMAN	180	177	P08238	Phyre	180:A	1629	17.13	Intra	11	1	55	16655	5
LDSGKELK	4	P08238	HS90B_HUMAN	69	64	P08238	Phyre	69:A	589	HSQFIGYPITLYLEKER	14	P08238	HS90B_HUMAN	219	204	P08238	Phyre	219:A	2054	27.97	Intra	1	1	55	25399	4
LDSGKELK	4	P08238	HS90B_HUMAN	69	64	P08238	Phyre	69:A	589	TKPIWTR	1	P08238	HS90B_HUMAN	286	284	P08238	Phyre	286:A	2301	20.93	Intra	4	1	55	16124	4
MEESKAK	4	P08238	HS90B_HUMAN	557	552	P08238	Phyre	557:A	5013	FENLCKLMK	5	P08238	HS90B_HUMAN	565	559	P08238	Phyre	565:A	5086	10.95	Intra	1	1	55	18919	4
NNIKLYVR	3	P08238	HS90B_HUMAN	354	350	P08238	Phyre	354:A	2988	KHSQFIGYPITLYLEK	0	P08238	HS90B_HUMAN	204	203	P08238	Phyre	204:A	1893	10.54	Intra	8	1	55	26806	4
NNIKLYVR	3	P08238	HS90B_HUMAN	354	350	3PRY	Structure	354:A	516	YIDQEELNKTKPIWTR	8	P08238	HS90B_HUMAN	284	275	3PRY	Structure	284:A	2	19	Intra	3	1	55	20909	5
RAPFDLFENKK	9	P08238	HS90B_HUMAN	347	337	P08238	Phyre	347:A	2916	KHSQFIGYPITLYLEK	0	P08238	HS90B_HUMAN	204	203	P08238	Phyre	204:A	1893	22.15	Intra	8	1	55	27808	5
RVKEVVK	2	P08238	HS90B_HUMAN	199	196	P08238	Phyre	199:A	1840	KHSQFIGYPITLYLEK	0	P08238	HS90B_HUMAN	204	203	P08238	Phyre	204:A	1893	8.57	Intra	5	1	55	21561	4
TKPIWTR	1	P08238	HS90B_HUMAN	286	284	P08238	Phyre	286:A	2301	GTKVILHLK	2	P08238	HS90B_HUMAN	180	177	P08238	Phyre	180:A	1629	25.61	Intra	4	1	55	18464	5
TKPIWTR	1	P08238	HS90B_HUMAN	286	284	P08238	Phyre	286:A	2301	HSQFIGYPITLYLEKER	14	P08238	HS90B_HUMAN	219	204	P08238	Phyre	219:A	2054	25.82	Intra	2	1	55	26941	4
TKPIWTR	1	P08238	HS90B_HUMAN	286	284	P08238	Phyre	286:A	2301	KHSQFIGYPITLYLEK	0	P08238	HS90B_HUMAN	204	203	P08238	Phyre	204:A	1893	14.09	Intra	12	1	55	26254	5
TKPIWTR	1	P08238	HS90B_HUMAN	286	284	3PRY	Structure	286:B	2089	NNIKLYVR	3	P08238	HS90B_HUMAN	354	350	3PRY	Structure	354:B	2575	16.82	Intra	4	1	55	19636	4
TKPIWTR	1	P08238	HS90B_HUMAN	286	284	P08238	Phyre	286:A	2301	YESLTDPSKLDSGKELK	13	P08238	HS90B_HUMAN	69	55	P08238	Phyre	69:A	589	20.93	Intra	4	1	55	18601	4
VKEVVK	1	P08238	HS90B_HUMAN	199	197	P08238	Phyre	199:A	1840	GTKVILHLK	2	P08238	HS90B_HUMAN	180	177	P08238	Phyre	180:A	1629	20.34	Intra	2	1	55	15783	5
VKEVVK	1	P08238	HS90B_HUMAN	199	197	P08238	Phyre	199:A	1840	HSQFIGYPITLYLEKER	14	P08238	HS90B_HUMAN	219	204	P08238	Phyre	219:A	2054	14.76	Intra	6	1	55	24810	4
VKEVVK	1	P08238	HS90B_HUMAN	199	197	P08238	Phyre	199:A	1840	KHSQFIGYPITLYLEK	0	P08238	HS90B_HUMAN	204	203	P08238	Phyre	204:A	1893	8.57	Intra	11	1	55	23954	5
VKEVVK	1	P08238	HS90B_HUMAN	199	197	P08238	Phyre	199:A	1840	KHSQFIGYPITLYLEKER	15	P08238	HS90B_HUMAN	219	203	P08238	Phyre	219:A	2054	14.76	Intra	1	1	55	21991	4
VKEVVKK	1	P08238	HS90B_HUMAN	199	197	P08238	Phyre	199:A	1840	TKPIWTR	1	P08238	HS90B_HUMAN	286	284	P08238	Phyre	286:A	2301	16.9	Intra	1	1	55	12948	5
VKEVVKK	5	P08238	HS90B_HUMAN	203	197	P08238	Phyre	203:A	1884	HSQFIGYPITLYLEKER	14	P08238	HS90B_HUMAN	219	204	P08238	Phyre	219:A	2054	19.73	Intra	1	1	55	22143	4
VKEVVKK	5	P08238	HS90B_HUMAN	203	197	P08238	Phyre	203:A	1884	TKPIWTR	1	P08238	HS90B_HUMAN	286	284	P08238	Phyre	286:A	2301	12.75	Intra	4	1	55	12784	4
YESLTDPSKLDSGKELK	13	P08238	HS90B_HUMAN	69	55	P08238	Phyre	69:A	589	HSQFIGYPITLYLEKER	14	P08238	HS90B_HUMAN	219	204	P08238	Phyre	219:A	2054	27.97	Intra	2	1	55	25725	4
YIDQEELNKTKPIWTR	8	P08238	HS90B_HUMAN	284	275	P08238	Phyre	284:A	2282	HSQFIGYPITLYLEKER	14	P08238	HS90B_HUMAN	219	204	P08238	Phyre	219:A	2054	19.9	Intra	1	1	55	27023	4
YIDQEELNKTKPIWTR	8	P08238	HS90B_HUMAN	284	275	P08238_P08238	Docking	284:A	2282	YIDQEELNKTKPIWTR	8	P08238	HS90B_HUMAN	284	275	P08238_P08238	Docking	284:B	2282	29.72	1	1	1	55	26357	5
APFDLFENKK	8	P08238	HS90B_HUMAN	347	338	3PRY	Structure	####	####	KNFATSLYSMIK	0	P08758	ANXA5_HUMAN	290	289	2XO3	Structure	290:A	2278	####	2	1	0.8	1	22721	5
YEKQIK	2	Q16543	CDC37_HUMAN	157	154	1US7	Structure	157:B	1725	KHSQFIGYPITLYLEK	0	P08238	HS90B_HUMAN	204	203	3PRY	Structure	####	####	####	1	4	0.97	1	24018	4
YEQKIR	3	Q7L3B6	CD37L_HUMAN	165	161	Q7L3B6	Phyre	165:A	939	KHSQFIGYPITLYLEK	0	P08238	HS90B_HUMAN	204	203	3PRY	Structure	####	####	####	1	4	1	1	24229	4
APSPEKAEEESER	5	P08243	ASNS_HUMAN	385	379	P08243	Modeller	385:A	3054	ADWLSHYWMPKWINATDPSAR	10	P08243	ASNS_HUMAN	540	529	P08243	Modeller	540:A	4369	55.37	Intra	1	1	2	26871	5
FPFNTPKTK	6	P08243	ASNS_HUMAN	511	504	P08243	Modeller	511:A	4101	ADWLSHYWMPKWINATDPSAR	10	P08243	ASNS_HUMAN	540	529	P08243	Modeller	540:A	4369	23.79	Intra	1	1	2	30473	4
ITYAKK	4	P08579	RU2B_HUMAN	224	219	P08579	Phyre	224:A	1697	DALQGFKITPSHAMK	6	P08579	RU2B_HUMAN	211	204	P08579	Phyre	211:A	1603	22.84	Intra	5	1	1	17754	5
ETNLDSLPLVDTHSKR	14	P08670	VIME_HUMAN	439	424	####		####	####	FLEQQNKILLAELEQLK	6	P08670	VIME_HUMAN	129	122	P08670		129:A	263	####	Intra	7	1	22	31439	4
FANYIDKVR	6	P08670	VIME_HUMAN	120	113	P08670		120:A	182	ETNLDSLPLVDTHSKR	14	P08670	VIME_HUMAN	439	424	####		####	####	####	Intra	1	1	22	21791	5
FANYIDKVR	6	P08670	VIME_HUMAN	120	113	P08670		120:A	182	FLEQQNKILLAELEQLK	6	P08670	VIME_HUMAN	129	122	P08670		129:A	263	14.21	Intra	3	1	22	32984	4
FANYIDKVR	6	P08670	VIME_HUMAN	120	113	P08670		120:A	182	FLEQQNKILLAELEQLKGQGK	6	P08670	VIME_HUMAN	129	122	P08670		129:A	263	14.21	Intra	2	1	22	28768	5
FANYIDKVR	6	P08670	VIME_HUMAN	120	113	P08670		120:A	182	ILLAELEQLKGQGK	9	P08670	VIME_HUMAN	139	129	P08670		139:A	344	28.14	Intra	2	1	22	26549	4
FANYIDKVR	6	P08670	VIME_HUMAN	120	113	P08670		120:A	182	SKFADLSEAANR	1	P08670	VIME_HUMAN	294	292	####		####	####	####	Intra	1	1	22	20407	4
FANYIDKVR	6	P08670	VIME_HUMAN	120	113	P08670		120:A	182	TLLIKTVETR	4	P08670	VIME_HUMAN	445	440	####		####	####	####	Intra	4	1	22	22500	4
FANYIDKVR	6	P08670	VIME_HUMAN	120	113	P08670		120:A	182	TNEKVELQELNDR	3	P08670	VIME_HUMAN	104	100	P08670		104:A	44	24.66	Intra	1	1	22	21290	4
GQGKSR	3	P08670	VIME_HUMAN	143	139	P08670		143:A	370	FANYIDKVR	6	P08670	VIME_HUMAN	120	113	P08670		120:A	182	34.15	Intra	3	1	22	14866	4
GQGKSR	3	P08670	VIME_HUMAN	143	139	P08670		143:A	370	FLEQQNKILLAELEQLK	6	P08670	VIME_HUMAN	129	122	P08670		129:A	263	21.1	Intra	4	1	22	28647	4
GQGKSR	3	P08670	VIME_HUMAN	143	139	3UF1	Structure	####	####	GQGKSR	3	P08670	VIME_HUMAN	143	139	3UF1	Structure	####	####	####	1	2	1	22	4634	4
ILLAELEQLKGQGK	9	P08670	VIME_HUMAN	139	129	P08670		139:A	344	FLEQQNKILLAELEQLK	6	P08670	VIME_HUMAN	129	122	P08670		129:A	263	15.4	1	4	1	22	36898	4
KLLEGEESR	0	P08670	VIME_HUMAN	402	401	####		####	####	FLEQQNKILLAELEQLK	6	P08670	VIME_HUMAN	129	122	P08670		129:A	263	####	Intra	1	1	22	31674	4
KLLEGEESR	0	P08670	VIME_HUMAN	402	401	####		####	####	SKFADLSEAANR	1	P08670	VIME_HUMAN	294	292	####		####	####	####	Intra	1	1	22	18897	4
KLLEGEESR	0	P08670	VIME_HUMAN	402	401	####		####	####	TLLIKTVETR	4	P08670	VIME_HUMAN	445	440	####		####	####	####	Intra	3	1	22	21280	4
KLLEGEESR	0	P08670	VIME_HUMAN	402	401	####		####	####	TNEKVELQELNDR	3	P08670	VIME_HUMAN	104	100	P08670		104:A	44	####	Intra	6	1	22	18522	4
QAKQESTEYR	2	P08670	VIME_HUMAN	313	310	####		####	####	SKFADLSEAANR	1	P08670	VIME_HUMAN	294	292	####		####	####	####	Intra	4	1	22	15844	4
SKFADLSEAANR	1	P08670	VIME_HUMAN	294	292	####		####	####	FLEQQNKILLAELEQLK	6	P08670	VIME_HUMAN	129	122	P08670		129:A	263	####	Intra	1	1	22	32472	4
SKFADLSEAANR	1	P08670	VIME_HUMAN	294	292	####		####	####	TNEKVELQELNDR	3	P08670	VIME_HUMAN	104	100	P08670		104:A	44	####	Intra	2	1	22	20901	4
TLLIKTVETR	4	P08670	VIME_HUMAN	445	440	####		####	####	ETNLDSLPLVDTHSKR	14	P08670	VIME_HUMAN	439	424	####		####	####	####	Intra	3	1	22	23304	5
TLLIKTVETR	4	P08670	VIME_HUMAN	445	440	####		####	####	FLEQQNKILLAELEQLK	6	P08670	VIME_HUMAN	129	122	P08670		129:A	263	####	Intra	2	1	22	34231	4
TLLIKTVETR	4	P08670	VIME_HUMAN	445	440	####		####	####	SKFADLSEAANR	1	P08670	VIME_HUMAN	294	292	####		####	####	####	Intra	1	1	22	23487	4
IAGYVTHLMKR	9	P08708	RS17_HUMAN	59	49	####		####	####	GISIKLQEEER	4	P08708	RS17_HUMAN	72	67	####		####	####	####	Intra	1	1	5	19151	4
LGNDFHTNKR	8	P08708	RS17_HUMAN	32	23	####		####	####	GISIKLQEEER	4	P08708	RS17_HUMAN	72	67	####		####	####	####	Intra	6	1	5	15620	4
VIIEKYYTR	4	P08708	RS17_HUMAN	19	14	####		####	####	GISIKLQEEER	4	P08708	RS17_HUMAN	72	67	####		####	####	####	Intra	2	1	5	21637	4
VIIEKYYTR	4	P08708	RS17_HUMAN	19	14	####		####	####	LGNDFHTNKR	8	P08708	RS17_HUMAN	32	23	####		####	####	####	Intra	8	1	5	15650	5
VIIEKYYTR	4	P08708	RS17_HUMAN	19	14	5T2C	Structure	####	####	VIIEKYYTR	4	P08708	RS17_HUMAN	19	14	5T2C	Structure	####	####	####	1	1	1	5	15068	5
AKLEAAIAEAEER	1	P08729	K2C7_HUMAN	331	329	P08729	Phyre	331:A	176	LQAEIDNIKNQR	8	P08729	K2C7_HUMAN	326	317	P08729	Phyre	326:A	134	9	Intra	2	1	3	21734	4
FASFIDKVR	6	P08729	K2C7_HUMAN	108	101	####		####	####	LLETKWTLLQEQK	4	P08729	K2C7_HUMAN	122	117	####		####	####	####	Intra	4	1	3	28959	4
GELALKDAR	5	P08729	K2C7_HUMAN	348	342	P08729	Phyre	348:A	302	AKQEELEAALQR	1	P08729	K2C7_HUMAN	353	351	P08729	Phyre	353:A	340	8.85	Intra	1	1	3	20402	4
LKIDFGEAAR	1	P08754	GNAI3_HUMAN	92	90	2ODE	Structure	92:C	4039	VKTTGIVETHFTFK	1	P08754	GNAI3_HUMAN	180	178	2ODE	Structure	180:C	4731	29.42	Intra	3	1	1	23141	5
LKIDFGDSAR	1	P63096	GNAI1_HUMAN	92	90	3UMR	Structure	92:A	662	VKTTGIVETHFTFK	1	P08754	GNAI3_HUMAN	180	178	2ODE	Structure	180:A	1138	####	1	1	0.95	1	22699	4
HALKGAGTNEK	3	P08758	ANXA5_HUMAN	101	97	2XO3	Structure	101:A	775	FEKLIVALMKPSR	2	P08758	ANXA5_HUMAN	79	76	2XO3	Structure	79:A	595	17.33	Intra	2	1	6	20742	5
KAMKGLGTDEESILTLLTSR	0	P08758	ANXA5_HUMAN	26	25	2XO3	Structure	####	####	KAMKGLGTDEESILTLLTSR	0	P08758	ANXA5_HUMAN	26	25	2XO3	Structure	####	####	####	N/A	1	0.98	6	34477	5
KVFDK	0	P08758	ANXA5_HUMAN	208	207	2XO3	Structure	208:A	1615	KNFATSLYSMIK	0	P08758	ANXA5_HUMAN	290	289	2XO3	Structure	290:A	2278	23.08	Intra	1	1	6	24433	4
LIVALMKPSR	6	P08758	ANXA5_HUMAN	86	79	2XO3	Structure	86:A	648	LYDAYELKHALK	7	P08758	ANXA5_HUMAN	97	89	2XO3	Structure	97:A	743	13.29	Intra	3	1	6	25331	4
LYDAYELKHALK	7	P08758	ANXA5_HUMAN	97	89	2XO3	Structure	97:A	743	FEKLIVALMKPSR	2	P08758	ANXA5_HUMAN	79	76	2XO3	Structure	79:A	595	16.03	Intra	1	1	6	25417	5
QEISAAFKTLFGR	7	P08758	ANXA5_HUMAN	58	50	2XO3	Structure	58:A	425	AMKGLGTDEESILTLLTSR	2	P08758	ANXA5_HUMAN	29	26	2XO3	Structure	29:A	206	14.26	Intra	1	1	6	40753	4
AVLKFAAATGATPIAGR	3	P08865	RSSA_HUMAN	89	85	####		####	####	EHPWEVMPDLYFYRDPEEIEKEEQAAAEK	20	P08865	RSSA_HUMAN	212	191	####		####	####	####	Intra	1	1	1	29048	6
GEVAPDAKSFVLNLGK	7	P09382	LEG1_HUMAN	29	21	P09382	Modeller	29:A	200	FNAHGDANTIVCNSKDGGAWGTEQR	14	P09382	LEG1_HUMAN	64	49	P09382	Modeller	64:A	470	21.22	Intra	6	1	3	23739	5
SFVLNLGKDSNNLCLHFNPR	7	P09382	LEG1_HUMAN	37	29	P09382	Modeller	37:A	261	FNAHGDANTIVCNSKDGGAWGTEQR	14	P09382	LEG1_HUMAN	64	49	P09382	Modeller	64:A	470	10	Intra	4	1	3	23489	4
VRGEVAPDAKSFVLNLGK	9	P09382	LEG1_HUMAN	29	19	P09382	Modeller	29:A	200	FNAHGDANTIVCNSKDGGAWGTEQR	14	P09382	LEG1_HUMAN	64	49	P09382	Modeller	64:A	470	21.22	Intra	1	1	3	21782	5
FKDPNAPK	1	P09429	HMGB1_HUMAN	90	88	2YRQ	Structure	97:A	1540	GKMSSYAFFVQTCR	1	P09429	HMGB1_HUMAN	12	10	2YRQ	Structure	19:A	235	33.95	Intra	1	1	5	20676	4
IKGEHPGLSIGDVAK	1	P09429	HMGB1_HUMAN	114	112	2YRQ	Structure	121:A	1937	GKMSSYAFFVQTCR	1	P09429	HMGB1_HUMAN	12	10	2YRQ	Structure	19:A	235	49.64	Intra	1	1	5	22015	4
KCSER	0	P09429	HMGB1_HUMAN	44	43	2YRQ	Structure	51:A	757	KHPDASVNFSEFSK	0	P09429	HMGB1_HUMAN	30	29	2YRQ	Structure	37:A	541	17.01	Intra	2	1	5	13807	5
WKTMSAK	1	P09429	HMGB1_HUMAN	50	48	2YRQ	Structure	57:A	864	GKMSSYAFFVQTCR	1	P09429	HMGB1_HUMAN	12	10	2YRQ	Structure	19:A	235	20.83	Intra	4	1	5	21762	4
WKTM[147.04]SAK	1	P09429	HMGB1_HUMAN	50	48	2YRQ	Structure	57:A	864	GKMSSYAFFVQTCR	1	P09429	HMGB1_HUMAN	12	10	2YRQ	Structure	19:A	235	20.83	Intra	4	1	5	20477	4
LCDFNPKSSK	6	P09496	CLCA_HUMAN	223	216	####		####	####	SVLISLKQAPLVH	6	P09496	CLCA_HUMAN	242	235	####		####	####	####	Intra	1	1	1	25357	4
LCDFNPKSSK	6	P09496	CLCA_HUMAN	223	216	P09496_Q00610	Docking	223:A	####	IAAYLFKGNNR	6	Q00610	CLH1_HUMAN	1516	1509	P09496_Q00610	Docking	1516:B	12197	####	1	2	1	2	19439	4
SVLISLKQAPLVH	6	P09496	CLCA_HUMAN	242	235	P09496_Q00610	Docking	242:A	####	MYDAAKLLYNNVSNFGR	5	Q00610	CLH1_HUMAN	1215	1209	P09496_Q00610	Docking	1215:B	9703	####	1	1	0.83	2	33744	4
AAQLGFKTVCIEK	6	P09622	DLDH_HUMAN	66	59	5J5Z	Structure	31:B	3864	ALTGGIAHLFKQNK	10	P09622	DLDH_HUMAN	143	132	5J5Z	Structure	108:B	4459	12.88	Intra	1	1	2	23707	5
ILQKQGFK	3	P09622	DLDH_HUMAN	267	263	5J5Z	Structure	232:B	5370	VGKFPFAANSR	2	P09622	DLDH_HUMAN	420	417	5J5Z	Structure	385:B	6545	22.27	Intra	2	1	2	19915	4
DPNTKR	4	P09651	ROA1_HUMAN	52	47	P09651	Phyre	52:A	403	SSGPYGGGGQYFAKPR	13	P09651	ROA1_HUMAN	350	336	####		####	####	####	Intra	3	1	10	14029	4
KIFVGGIK	0	P09651	ROA1_HUMAN	106	105	1L3K	Structure	106:A	776	IVIQKYHTVNGHNCEVR	4	P09651	ROA1_HUMAN	166	161	1L3K	Structure	166:A	1269	17.72	Intra	2	1	10	16972	6
KLFIGGLSFETTDESLR	0	P09651	ROA1_HUMAN	15	14	1L3K	Structure	15:A	64	IVIQKYHTVNGHNCEVR	4	P09651	ROA1_HUMAN	166	161	1L3K	Structure	166:A	1269	18.11	Intra	4	1	10	22564	4
SESPKEPEQLR	4	P09651	ROA1_HUMAN	8	3	1L3K	Structure	8:A	2	KLFIGGLSFETTDESLR	0	P09651	ROA1_HUMAN	15	14	1L3K	Structure	15:A	64	13.21	Intra	1	1	10	26936	4
SESPKEPEQLR	4	P09651	ROA1_HUMAN	8	3	P09651	Phyre	8:A	30	SSGPYGGGGQYFAKPR	13	P09651	ROA1_HUMAN	350	336	####		####	####	####	Intra	1	1	10	16777	4
SSGPYGGGGQYFAKPR	13	P09651	ROA1_HUMAN	350	336	####		####	####	IVIQKYHTVNGHNCEVR	4	P09651	ROA1_HUMAN	166	161	P09651	Phyre	166:A	1362	####	Intra	10	1	10	15613	5
SSGPYGGGGQYFAKPR	13	P09651	ROA1_HUMAN	350	336	####		####	####	KLFIGGLSFETTDESLR	0	P09651	ROA1_HUMAN	15	14	P09651	Phyre	15:A	92	####	Intra	2	1	10	28105	4
VVEPKR	4	P09651	ROA1_HUMAN	87	82	1L3K	Structure	87:A	715	DPNTKR	4	P09651	ROA1_HUMAN	52	47	1L3K	Structure	52:A	410	23.81	Intra	2	1	10	8139	4
VVEPKR	4	P09651	ROA1_HUMAN	87	82	1L3K	Structure	87:A	715	IVIQKYHTVNGHNCEVR	4	P09651	ROA1_HUMAN	166	161	1L3K	Structure	166:A	1269	19.31	Intra	1	1	10	11499	6
VVEPKR	4	P09651	ROA1_HUMAN	87	82	1L3K	Structure	87:A	715	KLFIGGLSFETTDESLR	0	P09651	ROA1_HUMAN	15	14	1L3K	Structure	15:A	64	8.47	Intra	1	1	10	26430	4
YKLLGGLAVR	1	P23396	RS3_HUMAN	108	106	1WH9	Structure	####	####	SSGPYGGGGQYFAKPR	13	P09651	ROA1_HUMAN	350	336	1L3K	Structure	####	####	####	1	2	1	1	23021	4
SKLILFPR	1	P26373	RL13_HUMAN	123	121	P26373	Phyre	123:A	996	SSGPYGGGGQYFAKPR	13	P09651	ROA1_HUMAN	350	336	####		####	####	####	2	1	0.95	1	23405	4
LLVKLYR	3	Q07020	RL18_HUMAN	30	26	Q07020	Modeller	30:A	251	SSGPYGGGGQYFAKPR	13	P09651	ROA1_HUMAN	350	336	####		####	####	####	2	1	0.92	1	21424	4
KQLPGVK	0	P09874	PARP1_HUMAN	197	196	####		####	####	WYHPGCFVKNR	8	P09874	PARP1_HUMAN	165	156	####		####	####	####	Intra	1	1	4	16057	5
LTGTANKASLCISTKK	14	P09874	PARP1_HUMAN	433	418	4DQY	Structure	####	####	LTGTANKASLCISTKK	14	P09874	PARP1_HUMAN	433	418	4DQY	Structure	####	####	####	1	1	0.99	4	18354	4
MEEVKEANIR	4	P09874	PARP1_HUMAN	447	442	####		####	####	SLQELFLAHILSPWGAEVKAEPVEVVAPR	18	P09874	PARP1_HUMAN	486	467	####		####	####	####	Intra	1	1	4	35788	4
YLLKLK	3	P09874	PARP1_HUMAN	1004	1000	4DQY	Structure	1004:F	10617	LTVNPGTKSK	7	P09874	PARP1_HUMAN	662	654	4DQY	Structure	662:F	7954	24.82	Intra	2	1	4	18453	4
GVLKVFLENVIR	3	P62805	H4_HUMAN	60	56	5B0Z	Structure	59:B	1059	ATIAGGGVIPHIHKSLIGK	13	P0C0S5	H2AZ_HUMAN	116	102	5B31	Structure	115:G	5200	####	1	3	1	1	30215	5
TKAVSR	1	P0C0S5	H2AZ_HUMAN	16	14	5B31	Structure	####	####	AVTKYTSSK	3	Q16778	H2B2E_HUMAN	121	117	4NFT	Structure	89:A	697	####	1	4	1	1	8724	4
NPAELAEKSQAR	7	P0C7T5	ATX1L_HUMAN	389	381	####		####	####	NPAELAEKSQAR	7	P0C7T5	ATX1L_HUMAN	389	381	####		####	####	####	1	1	0.79	1	27768	4
DAKLDK	2	P0DMV8	HS71A_HUMAN	325	322	5BN8	Structure	325:A	2622	STLEPVEKALR	7	P0DMV8	HS71A_HUMAN	319	311	5BN8	Structure	319:A	2576	9.68	Intra	4	1	7	18829	4
DISQNKR	5	P0DMV8	HS71A_HUMAN	257	251	5BN8	Structure	257:A	2029	FGDPVVQSDMKHWPFQVINDGDKPK	10	P0DMV8	HS71A_HUMAN	88	77	5BN8	Structure	88:A	668	16.25	Intra	1	1	7	23017	6
DISQNKR	5	P0DMV8	HS71A_HUMAN	257	251	5BN8	Structure	257:A	2029	LVNHFVEEFKR	9	P0DMV8	HS71A_HUMAN	246	236	5BN8	Structure	246:A	1938	15.84	Intra	1	1	7	16464	4
IPKVQK	2	P0DMV8	HS71A_HUMAN	345	342	5BN8	Structure	345:A	2773	LDKAQIHDLVLVGGSTR	2	P0DMV8	HS71A_HUMAN	328	325	5BN8	Structure	328:A	2647	19.71	Intra	7	1	7	20197	5
LSKEEIER	2	P0DMV8	HS71A_HUMAN	512	509	P0DMV8	Phyre	512:A	3886	ITITNDKGR	6	P0DMV8	HS71A_HUMAN	507	500	P0DMV8	Phyre	507:A	3848	12.29	Intra	1	1	7	14993	4
STLEPVEKALR	7	P0DMV8	HS71A_HUMAN	319	311	5BN8	Structure	319:A	2576	FGDPVVQSDMKHWPFQVINDGDKPK	10	P0DMV8	HS71A_HUMAN	88	77	5BN8	Structure	88:A	668	29.24	Intra	2	1	7	25949	5
STLEPVEKALR	7	P0DMV8	HS71A_HUMAN	319	311	5BN8	Structure	319:A	2576	KFGDPVVQSDMK	0	P0DMV8	HS71A_HUMAN	77	76	5BN8	Structure	77:A	576	28.74	Intra	1	1	7	22149	4
KFGLK	0	P0DN79	CBSL_HUMAN	98	97	P0DN79	Phyre	98:A	449	TVVDKWFK	4	P0DN79	CBSL_HUMAN	322	317	P0DN79	Phyre	322:A	2152	23.57	Intra	2	1	1	22434	4
AGAAKAK	4	P10412	H14_HUMAN	127	122	P10412	Modeller	127:A	881	KPAGAAK	0	P10412	H14_HUMAN	130	129	P10412	Modeller	130:A	904	8.9	Intra	1	1	3	5386	4
KPAGAAK	0	P10412	H14_HUMAN	130	129	P10412	Modeller	130:A	904	KATGAATPK	0	P10412	H14_HUMAN	140	139	P10412	Modeller	140:A	973	29.76	Intra	1	1	3	6145	4
SAGAAKR	5	P10412	H14_HUMAN	32	26	P10412	Modeller	32:A	211	KASGPPVSELITK	0	P10412	H14_HUMAN	34	33	P10412	Modeller	34:A	231	5.5	Intra	1	1	3	15706	4
KELNK	0	P10515	ODP2_HUMAN	462	461	P10515	Unknown	462:A	1059	SKISVNDFIIK	1	P10515	ODP2_HUMAN	473	471	P10515	Unknown	473:A	1151	16.08	Intra	2	1	1	22433	4
FGKLLLR	2	P10589	COT1_HUMAN	369	366	####		####	####	IFQEQVEKLK	7	P10589	COT1_HUMAN	308	300	####		####	####	####	Intra	1	0.95	1	22990	4
DKYKNIGAK	3	P10809	CH60_HUMAN	91	87	4PJ1	Structure	67:E	16162	ISKGANPVEIR	2	P10809	CH60_HUMAN	133	130	4PJ1	Structure	109:E	16467	23.5	Intra	1	1	8	13541	5
EGFEKISK	4	P10809	CH60_HUMAN	130	125	4PJ1	Structure	106:L	43877	TLKIPAMTIAK	2	P10809	CH60_HUMAN	473	470	4PJ1	Structure	449:L	46467	17.98	Intra	2	1	8	23808	4
ISKGANPVEIR	2	P10809	CH60_HUMAN	133	130	4PJ1	Structure	109:I	32143	TLKIPAMTIAK	2	P10809	CH60_HUMAN	473	470	4PJ1	Structure	449:I	34710	28.03	Intra	2	1	8	23958	4
TLKIPAMTIAK	2	P10809	CH60_HUMAN	473	470	4PJ1	Structure	449:N	54305	TLKIPAMTIAK	2	P10809	CH60_HUMAN	473	470	4PJ1	Structure	449:B	7277	19.02	1	3	1	8	23959	4
TVIIEQSWGSPKVTK	11	P10809	CH60_HUMAN	72	60	4PJ1	Structure	48:N	51286	GYISPYFINTSKGQK	11	P10809	CH60_HUMAN	233	221	4PJ1	Structure	209:N	52496	30.08	Intra	3	1	8	24844	4
YKNIGAK	1	P10809	CH60_HUMAN	91	89	4PJ1	Structure	67:J	35757	DKYKNIGAK	3	P10809	CH60_HUMAN	91	87	4PJ1	Structure	67:E	16162	24.17	1	5	1	8	10445	5
YKNIGAK	1	P10809	CH60_HUMAN	91	89	4PJ1	Structure	67:J	35757	DVKFGADAR	2	P10809	CH60_HUMAN	31	28	4PJ1	Structure	7:J	35312	12.36	Intra	1	1	8	14184	4
YKNIGAK	1	P10809	CH60_HUMAN	91	89	4PJ1	Structure	67:J	35757	YKNIGAK	1	P10809	CH60_HUMAN	91	89	4PJ1	Structure	67:E	16162	24.17	1	3	1	8	11307	4
NKITITNDQNR	1	P11021	BIP_HUMAN	523	521	6ASY	Structure	523:B	8704	IQQLVKEFFNGKEPSR	5	P11021	BIP_HUMAN	376	370	6ASY	Structure	376:B	7607	46.34	Intra	1	0.99	3	20921	5
NTVVPTKK	6	P11021	BIP_HUMAN	446	439	6ASY	Structure	446:B	8122	NKITITNDQNR	1	P11021	BIP_HUMAN	523	521	6ASY	Structure	523:B	8704	17.11	Intra	4	1	3	13384	4
STMKPVQK	3	P11021	BIP_HUMAN	340	336	6ASY	Structure	340:A	2525	VMEHFIKLYK	6	P11021	BIP_HUMAN	268	261	6ASY	Structure	268:A	1912	30.34	Intra	4	1	3	17173	4
DISENKR	5	P11142	HSP7C_HUMAN	257	251	4H5R	Structure	257:A	1959	FDDAVVQSDMKHWPFMVVNDAGRPK	10	P11142	HSP7C_HUMAN	88	77	4H5R	Structure	88:A	645	17.75	Intra	4	1	15	24558	6
DISENKR	5	P11142	HSP7C_HUMAN	257	251	4H5R	Structure	257:A	1959	FDDAVVQSDMKHWPFM[147.04]VVNDAGRPK	10	P11142	HSP7C_HUMAN	88	77	4H5R	Structure	88:A	645	17.75	Intra	2	1	15	22678	5
DISENKR	5	P11142	HSP7C_HUMAN	257	251	4H5R	Structure	257:A	1959	FDDAVVQSDM[147.04]KHWPFMVVNDAGRPK	10	P11142	HSP7C_HUMAN	88	77	4H5R	Structure	88:A	645	17.75	Intra	2	1	15	21373	5
DISENKR	5	P11142	HSP7C_HUMAN	257	251	4H5R	Structure	257:A	1959	MVNHFIAEFKR	9	P11142	HSP7C_HUMAN	246	236	4H5R	Structure	246:A	1863	15.93	Intra	3	1	15	17433	5
DISENKR	5	P11142	HSP7C_HUMAN	257	251	4H5R	Structure	257:A	1959	M[147.04]VNHFIAEFKR	9	P11142	HSP7C_HUMAN	246	236	4H5R	Structure	246:A	1863	15.93	Intra	1	1	15	16446	4
DISENKR	5	P11142	HSP7C_HUMAN	257	251	4H5R	Structure	257:A	1959	RFDDAVVQSDMKHWPFMVVNDAGRPK	11	P11142	HSP7C_HUMAN	88	76	4H5R	Structure	88:A	645	17.75	Intra	6	1	15	22745	6
DISENKR	5	P11142	HSP7C_HUMAN	257	251	4H5R	Structure	257:A	1959	RFDDAVVQSDM[147.04]KHWPFMVVNDAGRPK	11	P11142	HSP7C_HUMAN	88	76	4H5R	Structure	88:A	645	17.75	Intra	1	1	15	19859	6
DISENKR	5	P11142	HSP7C_HUMAN	257	251	4H5R	Structure	257:A	1959	RFDDAVVQSDM[147.04]KHWPFM[147.04]VVNDAGRPK	11	P11142	HSP7C_HUMAN	88	76	4H5R	Structure	88:A	645	17.75	Intra	2	1	15	18473	6
GTLDPVEKALR	7	P11142	HSP7C_HUMAN	319	311	4H5R	Structure	319:B	5418	FDDAVVQSDMKHWPFMVVNDAGRPK	10	P11142	HSP7C_HUMAN	88	77	4H5R	Structure	88:B	3604	28.3	Intra	5	1	15	28003	6
GTLDPVEKALR	7	P11142	HSP7C_HUMAN	319	311	4H5R	Structure	319:B	5418	RFDDAVVQSDMKHWPFMVVNDAGRPK	11	P11142	HSP7C_HUMAN	88	76	4H5R	Structure	88:B	3604	28.3	Intra	5	1	15	25808	5
GTLDPVEKALR	7	P11142	HSP7C_HUMAN	319	311	4H5R	Structure	319:B	5418	RFDDAVVQSDMKHWPFM[147.04]VVNDAGRPK	11	P11142	HSP7C_HUMAN	88	76	4H5R	Structure	88:B	3604	28.3	Intra	1	1	15	24308	6
IPKIQK	2	P11142	HSP7C_HUMAN	345	342	4H5R	Structure	345:B	5616	LDKSQIHDIVLVGGSTR	2	P11142	HSP7C_HUMAN	328	325	4H5R	Structure	328:B	5489	19.39	Intra	4	1	15	20155	5
IQKLLQDFFNGK	2	P11142	HSP7C_HUMAN	348	345	4H5R	Structure	348:B	5642	LDKSQIHDIVLVGGSTR	2	P11142	HSP7C_HUMAN	328	325	4H5R	Structure	328:B	5489	15.64	Intra	2	1	15	28481	5
LSKEDIER	2	P11142	HSP7C_HUMAN	512	509	P11142	Phyre	512:A	3881	ITITNDKGR	6	P11142	HSP7C_HUMAN	507	500	P11142	Phyre	507:A	3843	12.29	Intra	3	1	15	15403	4
MVNHFIAEFKR	9	P11142	HSP7C_HUMAN	246	236	4H5R	Structure	246:A	1863	FDDAVVQSDMKHWPFMVVNDAGRPK	10	P11142	HSP7C_HUMAN	88	77	4H5R	Structure	88:A	645	28.74	Intra	2	1	15	26105	5
VPVEKR	4	P11387	TOP1_HUMAN	545	540	1K4T	Structure	545:A	3786	VFKNLQLFMENK	2	P11387	TOP1_HUMAN	549	546	1K4T	Structure	549:A	3824	6.25	Intra	2	1	3	22732	4
YYNKVPVEKR	8	P11387	TOP1_HUMAN	545	536	1K4T	Structure	545:A	3786	VFKNLQLFMENK	2	P11387	TOP1_HUMAN	549	546	1K4T	Structure	549:A	3824	6.25	Intra	2	1	3	21337	5
YYNKVPVEKR	8	P11387	TOP1_HUMAN	545	536	1K4T	Structure	545:A	3786	VFKNLQLFM[147.04]ENK	2	P11387	TOP1_HUMAN	549	546	1K4T	Structure	549:A	3824	6.25	Intra	2	1	3	19282	5
AWKEAQQK	2	P11388	TOP2A_HUMAN	1091	1088	4FM9	Structure	1091:A	5329	VLFTCFKR	6	P11388	TOP2A_HUMAN	735	728	4FM9	Structure	735:A	2464	18.84	Intra	3	1	3	18994	4
GIPVVEHKVEK	7	P11388	TOP2A_HUMAN	131	123	P11388	Modeller	131:A	1064	NGYGAKLCNIFSTK	5	P11388	TOP2A_HUMAN	168	162	P11388	Modeller	168:A	1349	16.54	Intra	1	1	3	21361	4
GKILNVR	1	P11388	TOP2A_HUMAN	489	487	4FM9	Structure	489:A	409	LHGGKDSASPR	4	P11388	TOP2A_HUMAN	798	793	4FM9	Structure	798:A	2946	23.17	Intra	3	1	3	11795	5
ATPEEKLK	5	P11413	G6PD_HUMAN	95	89	1QKI	Structure	95:G	23913	KQSEPFFK	0	P11413	G6PD_HUMAN	82	81	1QKI	Structure	82:G	23814	15.46	Intra	1	1	11	17313	4
GPTEADELMKR	9	P11413	G6PD_HUMAN	497	487	1QKI	Structure	497:G	27132	VGFQYEGTYKWVNPHK	9	P11413	G6PD_HUMAN	508	498	1QKI	Structure	508:G	27227	21.03	Intra	4	1	11	20180	5
GPTEADELMKR	9	P11413	G6PD_HUMAN	497	487	####		####	####	VGFQYEGTYKWVNPHKL	15	P11413	G6PD_HUMAN	514	498	####		####	####	####	Intra	1	1	11	22123	4
GPTEADELMKR	9	P11413	G6PD_HUMAN	497	487	1QKI	Structure	497:G	27132	VGFQYEGTYKWVNPHKL	9	P11413	G6PD_HUMAN	508	498	1QKI	Structure	508:G	27227	21.03	Intra	3	1	11	22037	4
GPTEADELM[147.04]KR	9	P11413	G6PD_HUMAN	497	487	1QKI	Structure	497:G	27132	VGFQYEGTYKWVNPHKL	9	P11413	G6PD_HUMAN	508	498	1QKI	Structure	508:G	27227	21.03	Intra	1	1	11	20821	5
IIVEKPFGR	4	P11413	G6PD_HUMAN	171	166	1QKI	Structure	171:E	16719	IDHYLGKEMVQNLMVLR	6	P11413	G6PD_HUMAN	205	198	1QKI	Structure	205:E	17006	16.46	Intra	2	1	11	29495	5
WVNPHKL	5	P11413	G6PD_HUMAN	514	508	####		####	####	IDHYLGKEMVQNLMVLR	6	P11413	G6PD_HUMAN	205	198	####		####	####	####	Intra	4	1	11	27868	5
WVNPHKL	5	P11413	G6PD_HUMAN	514	508	1QKI	Structure	####	####	WVNPHKL	5	P11413	G6PD_HUMAN	514	508	1QKI	Structure	####	####	####	1	1	1	11	19988	4
YKNVK	1	P11413	G6PD_HUMAN	429	427	1QKI	Structure	429:C	10992	IDHYLGKEMVQNLMVLR	6	P11413	G6PD_HUMAN	205	198	1QKI	Structure	205:C	9222	17.6	Intra	1	1	11	25319	5
YKNVK	1	P11413	G6PD_HUMAN	429	427	1QKI	Structure	429:F	22680	VGFQYEGTYKWVNPHKL	9	P11413	G6PD_HUMAN	508	498	1QKI	Structure	508:F	23331	25.09	Intra	2	1	11	19646	5
YKNVK	1	P11413	G6PD_HUMAN	429	427	####		####	####	WVNPHKL	5	P11413	G6PD_HUMAN	514	508	####		####	####	####	Intra	3	1	11	15133	4
ITIGQAPTEKGHTR	9	P11586	C1TC_HUMAN	553	543	P11586	Phyre	553:A	1406	THLSLSHNPEQKGVPTGFILPIR	11	P11586	C1TC_HUMAN	878	866	P11586	Phyre	878:A	3778	52.49	Intra	1	1	2	21016	6
LKNQVTQLK	1	P11586	C1TC_HUMAN	21	19	1DIG	Structure	1021:B	2310	AAEEIGIKATHIK	7	P11586	C1TC_HUMAN	66	58	1DIG	Structure	1066:B	2663	12.04	Intra	1	1	2	15942	5
VTQGKGLMPDGTSR	4	P11766	ADHX_HUMAN	120	115	1MC5	Structure	119:A	873	AALEACHKGWGVSVVVGVAASGEEIATRPFQLVTGR	7	P11766	ADHX_HUMAN	284	276	1MC5	Structure	283:A	2067	41.61	Intra	2	1	1	31827	6
IVATKPLYVALAQR	4	P11940	PABP1_HUMAN	361	356	P11940	Phyre	361:A	2697	SKGFGFVCFSSPEEATK	1	P11940	PABP1_HUMAN	333	331	P11940	Phyre	333:A	2490	16.84	Intra	2	1	6	30476	4
KFEQMK	0	P11940	PABP1_HUMAN	279	278	P11940	Phyre	279:A	2075	AKEFTNVYIK	1	P11940	PABP1_HUMAN	188	186	P11940	Phyre	188:A	1350	26.99	Intra	2	1	6	18810	4
KVFVGR	0	P11940	PABP1_HUMAN	167	166	4F02	Structure	167:D	2966	AIEKMNGMLLNDR	3	P11940	PABP1_HUMAN	157	153	4F02	Structure	157:D	2890	12.9	Intra	4	1	6	20299	4
KVFVGR	0	P11940	PABP1_HUMAN	167	166	4F02	Structure	167:D	2966	AIEKM[147.04]NGM[147.04]LLNDR	3	P11940	PABP1_HUMAN	157	153	4F02	Structure	157:D	2890	12.9	Intra	1	1	6	16130	4
QTELKR	4	P11940	PABP1_HUMAN	277	272	P11940	Phyre	277:A	2055	SKGFGFVSFER	1	P11940	PABP1_HUMAN	231	229	P11940	Phyre	231:A	1692	25.35	Intra	1	1	6	20583	4
SKGFGFVSFER	1	P11940	PABP1_HUMAN	231	229	P11940	Phyre	231:A	1692	ELNGKQIYVGR	4	P11940	PABP1_HUMAN	259	254	P11940	Phyre	259:A	1903	9.84	Intra	4	1	6	23504	4
KVLEALK	0	P12004	PCNA_HUMAN	14	13	1U7B	Structure	14:A	105	ILKCAGNEDIITLR	2	P12004	PCNA_HUMAN	80	77	1U7B	Structure	80:A	612	10.08	Intra	2	1	1	23470	4
AFFKGAWSNVLR	3	P12236	ADT3_HUMAN	272	268	P12236	Phyre	272:A	2096	DFLAGGIAAAISKTAVAPIER	12	P12236	ADT3_HUMAN	23	10	P12236	Phyre	23:A	141	20.62	Intra	5	1	7	38462	4
AFFKGAWSNVLR	3	P12236	ADT3_HUMAN	272	268	P12236	Phyre	272:A	2096	KGADIMYTGTVDCWR	0	P12236	ADT3_HUMAN	245	244	P12236	Phyre	245:A	1878	25.55	Intra	1	1	7	29573	4
AFFKGAWSNVLR	3	P12236	ADT3_HUMAN	272	268	P12236	Phyre	272:A	2096	LLLQVQHASKQIAADK	9	P12236	ADT3_HUMAN	43	33	P12236	Phyre	43:A	295	17.83	Intra	3	1	7	24996	5
LAADVGKSGTER	6	P12236	ADT3_HUMAN	147	140	P12236	Phyre	147:A	1118	AFFKGAWSNVLR	3	P12236	ADT3_HUMAN	272	268	P12236	Phyre	272:A	2096	23.6	Intra	4	1	7	23656	4
LAADVGKSGTER	6	P12236	ADT3_HUMAN	147	140	P12236	Phyre	147:A	1118	VKLLLQVQHASK	1	P12236	ADT3_HUMAN	33	31	P12236	Phyre	33:A	216	19.12	Intra	1	1	7	17638	5
VKLLLQVQHASK	1	P12236	ADT3_HUMAN	33	31	P12236	Phyre	33:A	216	AFFKGAWSNVLR	3	P12236	ADT3_HUMAN	272	268	P12236	Phyre	272:A	2096	7.79	Intra	8	1	7	26277	4
VKLLLQVQHASK	1	P12236	ADT3_HUMAN	33	31	P12236	Phyre	33:A	216	KGADIMYTGTVDCWR	0	P12236	ADT3_HUMAN	245	244	P12236	Phyre	245:A	1878	26.33	Intra	3	1	7	22913	4
WVPVNKSAIPER	5	Q8WZ42	TITIN_HUMAN	19374	19368	1TKI	Structure	####	####	DFLAGGIAAAISKTAVAPIER	12	P12236	ADT3_HUMAN	23	10	P12236	Phyre	23:A	141	####	2	2	0.76	1	38355	4
SMTEAEQQQLIDDHFLFDKPVSPLLLASGMAR	18	P12277	KCRB_HUMAN	196	177	3B6R	Structure	196:B	4454	SMTEAEQQQLIDDHFLFDKPVSPLLLASGMAR	18	P12277	KCRB_HUMAN	196	177	3B6R	Structure	196:A	1494	41.34	1	1	1	5	40774	6
VISMQKGGNMK	5	P12277	KCRB_HUMAN	242	236	3B6R	Structure	242:A	1870	AGVHIKLPNLGK	5	P12277	KCRB_HUMAN	298	292	3B6R	Structure	298:A	2313	13.14	Intra	7	1	5	19317	5
VISMQKGGNM[147.04]K	5	P12277	KCRB_HUMAN	242	236	3B6R	Structure	242:A	1870	AGVHIKLPNLGK	5	P12277	KCRB_HUMAN	298	292	3B6R	Structure	298:A	2313	13.14	Intra	2	1	5	18699	5
VISM[147.04]QKGGNMK	5	P12277	KCRB_HUMAN	242	236	3B6R	Structure	242:A	1870	AGVHIKLPNLGK	5	P12277	KCRB_HUMAN	298	292	3B6R	Structure	298:A	2313	13.14	Intra	3	1	5	17801	5
VISM[147.04]QKGGNM[147.04]K	5	P12277	KCRB_HUMAN	242	236	3B6R	Structure	242:A	1870	AGVHIKLPNLGK	5	P12277	KCRB_HUMAN	298	292	3B6R	Structure	298:A	2313	13.14	Intra	2	1	5	17199	5
KHYGYSLYSAIK	0	P12429	ANXA3_HUMAN	293	292	1AII	Structure	294:A	2316	ALKGIGTDEFTLNR	2	P12429	ANXA3_HUMAN	263	260	1AII	Structure	264:A	2072	17.49	Intra	2	1	2	22219	5
KHYGYSLYSAIK	0	P12429	ANXA3_HUMAN	293	292	1AII	Structure	294:A	2316	SFPQLKLTFDEYR	5	P12429	ANXA3_HUMAN	210	204	1AII	Structure	211:A	1645	21.41	Intra	3	1	2	26097	4
AIVEKLR	4	P12956	XRCC6_HUMAN	468	463	1JEY	Structure	468:A	4425	VEAMNKR	5	P12956	XRCC6_HUMAN	516	510	1JEY	Structure	516:A	4819	10.35	Intra	3	1	1	14600	4
AIVEKLR	4	P12956	XRCC6_HUMAN	468	463	1JEY	Structure	####	####	CFSVLGFCKSSQVQR	8	P13010	XRCC5_HUMAN	347	338	1JEY	Structure	####	####	####	1	2	0.8	3	23102	4
FTVPMLKEACR	6	P12956	XRCC6_HUMAN	582	575	1JEY	Structure	####	####	FSKSQLDIIIHSLK	2	P13010	XRCC5_HUMAN	144	141	1JEY	Structure	####	####	####	1	3	1	3	31361	4
KMPFTEK	0	P12956	XRCC6_HUMAN	445	444	1JEY	Structure	####	####	FFMGNQVLKVFAAR	8	P13010	XRCC5_HUMAN	363	354	1JEY	Structure	####	####	####	1	1	0.87	3	29756	4
KFLAPK	0	P13010	XRCC5_HUMAN	703	702	####		####	####	FNNFLKALQEK	5	P13010	XRCC5_HUMAN	660	654	####		####	####	####	Intra	4	1	3	24281	4
KLCVFK	0	P13010	XRCC5_HUMAN	233	232	1JEY	Structure	233:B	6685	FFMGNQVLKVFAAR	8	P13010	XRCC5_HUMAN	363	354	1JEY	Structure	363:B	7750	23.27	Intra	1	1	3	31081	4
YAYDKR	4	P13010	XRCC5_HUMAN	399	394	1JEY	Structure	399:B	8024	IAAYKSILQER	4	P13010	XRCC5_HUMAN	265	260	1JEY	Structure	265:B	6948	19.18	Intra	3	1	3	19440	4
IMGPNYTPGKKEDLYLKPIQR	16	P13639	EF2_HUMAN	445	428	P13639	Phyre	445:A	3274	IMGPNYTPGKKEDLYLKPIQR	16	P13639	EF2_HUMAN	445	428	P13639	Phyre	445:A	3274	####	1	1	0.96	19	25948	5
KDEQER	0	P13639	EF2_HUMAN	61	60	P13639	Phyre	61:A	409	MVPTSDKGR	6	P13639	EF2_HUMAN	407	400	P13639	Phyre	407:A	2973	15.93	Intra	2	1	19	8226	4
KDEQER	0	P13639	EF2_HUMAN	61	60	P13639	Phyre	61:A	409	M[147.04]VPTSDKGR	6	P13639	EF2_HUMAN	407	400	P13639	Phyre	407:A	2973	15.93	Intra	1	1	19	6968	4
KDEQER	0	P13639	EF2_HUMAN	61	60	P13639	Phyre	61:A	409	VFSGLVSTGLKVR	10	P13639	EF2_HUMAN	426	415	P13639	Phyre	426:A	3119	36.28	Intra	6	1	19	19281	4
KLWGDR	0	P13639	EF2_HUMAN	259	258	P13639	Phyre	259:A	1826	FAAKGEGQLGPAER	3	P13639	EF2_HUMAN	239	235	P13639	Phyre	239:A	1771	10.2	Intra	7	1	19	16894	4
KLWGDR	0	P13639	EF2_HUMAN	259	258	P13639	Phyre	259:A	1826	FSKSATSPEGK	2	P13639	EF2_HUMAN	275	272	P13639	Phyre	275:A	1961	8.88	Intra	14	1	19	14370	4
KLWGDR	0	P13639	EF2_HUMAN	259	258	P13639	Phyre	259:A	1826	KVEDMMK	0	P13639	EF2_HUMAN	252	251	####		####	####	####	Intra	7	1	19	16418	4
KLWGDR	0	P13639	EF2_HUMAN	259	258	P13639	Phyre	259:A	1826	KVEDMM[147.04]K	0	P13639	EF2_HUMAN	252	251	####		####	####	####	Intra	4	1	19	13863	4
KLWGDR	0	P13639	EF2_HUMAN	259	258	P13639	Phyre	259:A	1826	KVEDM[147.04]MK	0	P13639	EF2_HUMAN	252	251	####		####	####	####	Intra	2	1	19	14047	4
KLWGDR	0	P13639	EF2_HUMAN	259	258	P13639	Phyre	259:A	1826	KVEDM[147.04]M[147.04]K	0	P13639	EF2_HUMAN	252	251	####		####	####	####	Intra	1	1	19	12425	4
KLWGDR	0	P13639	EF2_HUMAN	259	258	P13639	Phyre	259:A	1826	LIEKLDIK	3	P13639	EF2_HUMAN	318	314	P13639	Phyre	318:A	2282	22.31	Intra	3	1	19	20996	4
KLWGDR	0	P13639	EF2_HUMAN	259	258	P13639	Phyre	259:A	1826	YFDPANGKFSK	7	P13639	EF2_HUMAN	272	264	P13639	Phyre	272:A	1935	11.47	Intra	2	1	19	19043	4
KSDPVVSYR	0	P13639	EF2_HUMAN	572	571	P13639	Phyre	572:A	4249	VAVEAKNPADLPK	5	P13639	EF2_HUMAN	512	506	P13639	Phyre	512:A	3792	9.84	Intra	1	1	19	17231	4
KVEDMMK	0	P13639	EF2_HUMAN	252	251	####		####	####	FSKSATSPEGK	2	P13639	EF2_HUMAN	275	272	P13639	Phyre	275:A	1961	####	Intra	7	1	19	13442	4
LIEKLDIK	3	P13639	EF2_HUMAN	318	314	P13639	Phyre	318:A	2282	FAAKGEGQLGPAER	3	P13639	EF2_HUMAN	239	235	P13639	Phyre	239:A	1771	21.87	Intra	4	1	19	20795	4
M[147.04]VPTSDKGR	6	P13639	EF2_HUMAN	407	400	P13639	Phyre	407:A	2973	VFSGLVSTGLKVR	10	P13639	EF2_HUMAN	426	415	P13639	Phyre	426:A	3119	24.34	Intra	1	1	19	19753	4
VFSGLVSTGLKVR	10	P13639	EF2_HUMAN	426	415	P13639	Phyre	426:A	3119	KEDLYLKPIQR	0	P13639	EF2_HUMAN	439	438	P13639	Phyre	439:A	3220	16.97	Intra	5	1	19	22379	4
VFSGLVSTGLKVR	10	P13639	EF2_HUMAN	426	415	P13639	Phyre	426:A	3119	KEDLYLKPIQR	6	P13639	EF2_HUMAN	445	438	P13639	Phyre	445:A	3274	5.28	Intra	8	1	19	22560	4
VMKFSVSPVVR	2	P13639	EF2_HUMAN	498	495	P13639	Phyre	498:A	3688	VAVEAKNPADLPK	5	P13639	EF2_HUMAN	512	506	P13639	Phyre	512:A	3792	36	Intra	3	1	19	22867	4
FQSKYEPR	3	P13667	PDIA4_HUMAN	366	362	P13667	Phyre	366:A	2259	DFVLKYALPLVGHR	4	P13667	PDIA4_HUMAN	391	386	P13667	Phyre	391:A	2385	12.6	Intra	2	1	2	27368	4
FQSKYEPR	3	P13667	PDIA4_HUMAN	366	362	P13667	Phyre	366:A	2259	FLKVSQGQLVVMQPEK	2	P13667	PDIA4_HUMAN	349	346	P13667	Phyre	349:A	2125	11.32	Intra	2	1	2	21228	4
VKPFMTGAAEQIKHILANFK	12	P13693	TCTP_HUMAN	123	110	5O9M	Structure	123:B	2131	VKPFMTGAAEQIKHILANFK	12	P13693	TCTP_HUMAN	123	110	5O9M	Structure	123:A	821	63.91	1	1	0.97	1	35306	5
KAINR	0	P13797	PLST_HUMAN	95	94	####		####	####	SSDIAKTFR	5	P13797	PLST_HUMAN	91	85	####		####	####	####	Intra	1	0.95	1	13166	4
KLIELQAGK	0	P14314	GLU2B_HUMAN	158	157	####		####	####	NKFEEAER	1	P14314	GLU2B_HUMAN	376	374	####		####	####	####	Intra	4	1	4	17268	4
LVSQKPK	4	P14314	GLU2B_HUMAN	436	431	P14314	iTasser	436:A	247	KLIELQAGK	0	P14314	GLU2B_HUMAN	158	157	####		####	####	####	Intra	1	0.97	4	15834	4
LVSQKPK	4	P14314	GLU2B_HUMAN	436	431	P14314	iTasser	436:A	247	KLIELQAGKK	0	P14314	GLU2B_HUMAN	158	157	####		####	####	####	Intra	4	1	4	13726	5
NKFEEAER	1	P14314	GLU2B_HUMAN	376	374	####		####	####	KLIELQAGKK	0	P14314	GLU2B_HUMAN	158	157	####		####	####	####	Intra	3	1	4	15267	5
FTEKR	3	P14324	FPPS_HUMAN	257	253	4NUA	Structure	191:A	1542	LLKLYCR	2	P14324	FPPS_HUMAN	210	207	4NUA	Structure	144:A	1115	39.49	Intra	1	1	1	16620	4
EMIKSGMNVAR	3	P14618	KPYM_HUMAN	66	62	3GR4	Structure	66:A	402	KGDVVIVLTGWRPGSGFTNTMR	0	P14618	KPYM_HUMAN	505	504	3GR4	Structure	505:A	3686	25.2	Intra	2	1	6	26342	4
KVLGEK	0	P14618	KPYM_HUMAN	256	255	3GR4	Structure	256:A	1806	KASDVHEVR	0	P14618	KPYM_HUMAN	247	246	3GR4	Structure	247:A	1734	14.78	Intra	1	1	6	9011	5
KVLGEK	0	P14618	KPYM_HUMAN	256	255	3GR4	Structure	256:D	13188	NICKVVEVGSK	3	P14618	KPYM_HUMAN	166	162	3GR4	Structure	166:D	12573	27.34	Intra	7	1	6	15499	4
KVLGEK	0	P14618	KPYM_HUMAN	256	255	3GR4	Structure	256:D	13188	NIKIISK	2	P14618	KPYM_HUMAN	266	263	3GR4	Structure	266:D	13258	12.65	Intra	1	1	6	15042	4
LNFSHGTHEYHAETIKNVR	15	P14618	KPYM_HUMAN	89	73	3GR4	Structure	89:C	8213	GIFPVLCKDPVQEAWAEDVDLR	7	P14618	KPYM_HUMAN	475	467	3GR4	Structure	475:C	11084	21.14	Intra	1	1	6	25078	6
SVETLKEMIK	5	P14618	KPYM_HUMAN	62	56	3GR4	Structure	62:A	368	LNFSHGTHEYHAETIKNVR	15	P14618	KPYM_HUMAN	89	73	3GR4	Structure	89:A	584	12.77	Intra	2	1	6	17813	6
AQAYQTGKDISTNYYASQK	7	P14625	ENPL_HUMAN	671	663	P14625	Phyre	671:A	4664	VFITDDFHDMMPKYLNFVK	12	P14625	ENPL_HUMAN	428	415	P14625	Phyre	428:A	2719	29.6	Intra	2	1	16	30169	4
AQAYQTGKDISTNYYASQK	7	P14625	ENPL_HUMAN	671	663	P14625	Phyre	671:A	4664	VFITDDFHDM[147.04]MPKYLNFVK	12	P14625	ENPL_HUMAN	428	415	P14625	Phyre	428:A	2719	29.6	Intra	1	1	16	27258	5
ETLQQHKLLK	6	P14625	ENPL_HUMAN	455	448	P14625	Phyre	455:A	2938	VFITDDFHDMMPKYLNFVK	12	P14625	ENPL_HUMAN	428	415	P14625	Phyre	428:A	2719	19.34	Intra	1	1	16	28677	4
FQNVAKEGVK	5	P14625	ENPL_HUMAN	593	587	P14625	Phyre	593:A	4085	VFITDDFHDMMPKYLNFVK	12	P14625	ENPL_HUMAN	428	415	P14625	Phyre	428:A	2719	31.44	Intra	2	1	16	29260	5
GLFDEYGSKK	8	P14625	ENPL_HUMAN	404	395	P14625	Phyre	404:A	2508	VFITDDFHDMMPKYLNFVK	12	P14625	ENPL_HUMAN	428	415	P14625	Phyre	428:A	2719	9.46	Intra	6	1	16	32270	4
GLFDEYGSKK	8	P14625	ENPL_HUMAN	404	395	P14625	Phyre	404:A	2508	VFITDDFHDMM[147.04]PKYLNFVK	12	P14625	ENPL_HUMAN	428	415	P14625	Phyre	428:A	2719	9.46	Intra	1	1	16	29051	4
GLFDEYGSKK	8	P14625	ENPL_HUMAN	404	395	P14625	Phyre	404:A	2508	VFITDDFHDM[147.04]MPKYLNFVK	12	P14625	ENPL_HUMAN	428	415	P14625	Phyre	428:A	2719	9.46	Intra	2	1	16	29291	4
IMKAQAYQTGK	2	P14625	ENPL_HUMAN	663	660	P14625	Phyre	663:A	4604	VFITDDFHDMMPKYLNFVK	12	P14625	ENPL_HUMAN	428	415	P14625	Phyre	428:A	2719	24.84	Intra	4	1	16	29123	5
KSDYIK	0	P14625	ENPL_HUMAN	405	404	P14625	Phyre	405:A	2517	VFITDDFHDMMPKYLNFVK	12	P14625	ENPL_HUMAN	428	415	P14625	Phyre	428:A	2719	8.67	Intra	2	1	16	29363	5
KSDYIK	0	P14625	ENPL_HUMAN	405	404	P14625	Phyre	405:A	2517	VFITDDFHDM[147.04]MPKYLNFVK	12	P14625	ENPL_HUMAN	428	415	P14625	Phyre	428:A	2719	8.67	Intra	1	1	16	26194	4
KTLDMIK	0	P14625	ENPL_HUMAN	467	466	P14625	Phyre	467:A	3042	TVWDWELMNDIKPIWQRPSK	11	P14625	ENPL_HUMAN	340	328	P14625	Phyre	340:A	1982	22.73	Intra	1	1	16	31505	5
LLKVIR	2	P14625	ENPL_HUMAN	458	455	P14625	Phyre	458:A	2963	VFITDDFHDMMPKYLNFVK	12	P14625	ENPL_HUMAN	428	415	P14625	Phyre	428:A	2719	13.97	Intra	4	1	16	32254	4
NKEIFLR	1	P14625	ENPL_HUMAN	97	95	4NH9	Structure	97:A	198	MMKLIINSLYK	2	P14625	ENPL_HUMAN	87	84	4NH9	Structure	87:A	114	13.65	Intra	5	1	16	27690	4
NKEIFLR	1	P14625	ENPL_HUMAN	97	95	4NH9	Structure	97:A	198	MM[147.04]KLIINSLYK	2	P14625	ENPL_HUMAN	87	84	4NH9	Structure	87:A	114	13.65	Intra	3	1	16	25052	4
NKEIFLR	1	P14625	ENPL_HUMAN	97	95	4NH9	Structure	97:A	198	M[147.04]MKLIINSLYK	2	P14625	ENPL_HUMAN	87	84	4NH9	Structure	87:A	114	13.65	Intra	1	1	16	26133	4
NLGTIAKSGTSEFLNK	6	P14625	ENPL_HUMAN	168	161	P14625	Phyre	168:A	933	VFITDDFHDMMPKYLNFVK	12	P14625	ENPL_HUMAN	428	415	P14625	Phyre	428:A	2719	41.34	Intra	3	1	16	31614	5
TKEQLGYIVFSGPR	1	P14735	IDE_HUMAN	826	824	2WK3	Structure	826:A	6367	FIIQSEKPPHYLESR	6	P14735	IDE_HUMAN	854	847	2WK3	Structure	854:A	6591	14.75	Intra	7	1	2	24365	5
TKEQLGYIVFSGPR	1	P14735	IDE_HUMAN	826	824	2WK3	Structure	826:B	14116	SIEDMTEEAFQKHIQALAIR	11	P14735	IDE_HUMAN	884	872	2WK3	Structure	884:B	14589	23.87	Intra	1	1	2	31227	5
AITHLNNNFMFGQKLNVCVSK	13	P14866	HNRPL_HUMAN	448	434	3TO8	Structure	448:A	566	SSSGLLEWESKSDALETLGFLNHYQMK	10	P14866	HNRPL_HUMAN	552	541	3TO8	Structure	552:A	1317	12.33	Intra	1	1	5	33837	5
FSTPEQAAKNR	8	P14866	HNRPL_HUMAN	493	484	3TO8	Structure	493:A	903	NPNGPYPYTLKLCFSTAQHAS	10	P14866	HNRPL_HUMAN	579	568	3TO8	Structure	579:A	1532	12.74	Intra	2	1	5	24051	4
RPSSVKVFSGK	5	P14866	HNRPL_HUMAN	533	527	3TO8	Structure	533:A	1212	FSTPEQAAKNR	8	P14866	HNRPL_HUMAN	493	484	3TO8	Structure	493:A	903	20.99	Intra	2	1	5	13077	5
SKPGAAMVEMADGYAVDR	1	P14866	HNRPL_HUMAN	418	416	3TO8	Structure	418:A	342	AITHLNNNFMFGQKLNVCVSK	13	P14866	HNRPL_HUMAN	448	434	3TO8	Structure	448:A	566	16.17	Intra	2	1	5	25596	4
VFSGKSER	4	P14866	HNRPL_HUMAN	538	533	P14866	Phyre	538:A	1193	FSTPEQAAKNR	8	P14866	HNRPL_HUMAN	493	484	P14866	Phyre	493:A	829	18.49	Intra	3	1	5	12072	4
GACQKTLSDLK	4	P15121	ALDR_HUMAN	95	90	1US0	Structure	94:A	804	LDYLDLYLIHWPTGFKPGK	15	P15121	ALDR_HUMAN	117	101	1US0	Structure	116:A	1027	18.53	Intra	3	1	6	31767	4
IKAIAAK	1	P15121	ALDR_HUMAN	235	233	1US0	Structure	234:A	2196	NLVVIPKSVTPER	6	P15121	ALDR_HUMAN	263	256	1US0	Structure	262:A	2429	19.44	Intra	1	1	6	21417	4
LLLNNGAKMPILGLGTWK	7	P15121	ALDR_HUMAN	12	4	1US0	Structure	11:A	81	YKPAVNQIECHPYLTQEK	1	P15121	ALDR_HUMAN	179	177	1US0	Structure	178:A	1611	15.69	Intra	4	1	6	28417	5
LLLNNGAKM[147.04]PILGLGTWK	7	P15121	ALDR_HUMAN	12	4	1US0	Structure	11:A	81	YKPAVNQIECHPYLTQEK	1	P15121	ALDR_HUMAN	179	177	1US0	Structure	178:A	1611	15.69	Intra	1	1	6	25626	5
MPILGLGTWKSPPGQVTEAVK	9	P15121	ALDR_HUMAN	22	12	1US0	Structure	21:A	168	GIVVTAYSPLGSPDRPWAKPEDPSLLEDPR	18	P15121	ALDR_HUMAN	222	203	1US0	Structure	221:A	2084	16.92	Intra	1	1	6	32746	4
NLVVIPKSVTPER	6	P15121	ALDR_HUMAN	263	256	1US0	Structure	262:A	2429	MPILGLGTWKSPPGQVTEAVK	9	P15121	ALDR_HUMAN	22	12	1US0	Structure	21:A	168	8.45	Intra	3	1	6	30641	5
TFIAIKPDGVQR	5	P15531	NDKA_HUMAN	12	6	1UCN	Structure	12:B	1276	VMLGETNPADSKPGTIR	11	P15531	NDKA_HUMAN	100	88	1UCN	Structure	100:B	1973	19.34	Intra	2	1	5	23128	4
TFIAIKPDGVQR	5	P15531	NDKA_HUMAN	12	6	1UCN	Structure	12:B	1276	YMHSGPVVAMVWEGLNVVKTGR	18	P15531	NDKA_HUMAN	85	66	1UCN	Structure	85:B	1865	19.43	Intra	2	1	5	33369	5
VMLGETNPADSKPGTIR	11	P15531	NDKA_HUMAN	100	88	1UCN	Structure	100:C	3169	VMLGETNPADSKPGTIR	11	P15531	NDKA_HUMAN	100	88	1UCN	Structure	100:A	777	9.17	1	4	1	5	21146	4
VMLGETNPADSKPGTIR	11	P15531	NDKA_HUMAN	100	88	1UCN	Structure	100:B	1973	YMHSGPVVAMVWEGLNVVKTGR	18	P15531	NDKA_HUMAN	85	66	1UCN	Structure	85:B	1865	16.01	Intra	5	1	5	31731	5
VM[147.04]LGETNPADSKPGTIR	11	P15531	NDKA_HUMAN	100	88	1UCN	Structure	100:C	3169	VMLGETNPADSKPGTIR	11	P15531	NDKA_HUMAN	100	88	1UCN	Structure	100:A	777	9.17	1	2	1	5	20132	4
KLEDSTR	0	P15924	DESP_HUMAN	1916	1915	####		####	####	LQAEIKR	5	P15924	DESP_HUMAN	1907	1901	####		####	####	####	Intra	1	0.95	1	11553	4
APSGGKK	5	P16104	H2AX_HUMAN	134	128	####		####	####	KTSATVGPK	0	P16104	H2AX_HUMAN	120	119	P16104	Phyre	120:A	893	####	Intra	1	0.97	1	6823	4
TDMAGPKATK	6	P16152	CBR1_HUMAN	239	232	1WMA	Structure	238:A	1977	ALKSCSPELQQK	2	P16152	CBR1_HUMAN	148	145	1WMA	Structure	147:A	1190	25.95	Intra	1	0.97	1	12649	4
LWLLDDSKSWWR	7	P16333	NCK1_HUMAN	36	28	####		####	####	NSMNKTGFVPSNYVER	4	P16333	NCK1_HUMAN	47	42	####		####	####	####	Intra	1	0.97	1	32121	4
AAGAGAAKR	7	P16401	H15_HUMAN	35	27	P16401	Modeller	35:A	229	KATGPPVSELITK	0	P16401	H15_HUMAN	37	36	P16401	Modeller	37:A	249	5.49	Intra	1	1	3	16306	4
AGAAKAK	4	P16401	H15_HUMAN	130	125	P16401	Modeller	130:A	902	KPAGATPK	0	P16401	H15_HUMAN	133	132	P16401	Modeller	133:A	925	10.16	Intra	1	1	3	6129	4
KATGPPVSELITK	0	P16401	H15_HUMAN	37	36	P16401	Modeller	37:A	249	ALAAGGYDVEKNNSR	10	P16401	H15_HUMAN	78	67	P16401	Modeller	78:A	536	21.07	Intra	2	1	3	20125	4
AGGTKPK	4	P16403	H12_HUMAN	127	122	P16403	Modeller	127:A	878	KPVGAAK	0	P16403	H12_HUMAN	130	129	P16403	Modeller	130:A	903	9.91	Intra	1	1	16	6793	4
AVAASKER	5	P16403	H12_HUMAN	52	46	P16403	Modeller	52:A	345	GTGASGSFKLNK	8	P16403	H12_HUMAN	106	97	P16403	Modeller	106:A	731	12.87	Intra	2	1	16	11813	4
AVAASKER	5	P16403	H12_HUMAN	52	46	P16403	Modeller	52:A	345	KAASGEAKPK	0	P16403	H12_HUMAN	110	109	P16403	Modeller	110:A	765	20.93	Intra	1	1	16	5328	4
AVAASKER	5	P16403	H12_HUMAN	52	46	P16403	Modeller	52:A	345	KALAAAGYDVEK	0	P16403	H12_HUMAN	64	63	P16403	Modeller	64:A	432	9.98	Intra	3	1	16	13445	4
AVAASKER	5	P16403	H12_HUMAN	52	46	P16403	Modeller	52:A	345	KASGPPVSELITK	0	P16403	H12_HUMAN	34	33	P16403	Modeller	34:A	225	27.23	Intra	1	1	16	17128	4
IKLGLK	1	P16403	H12_HUMAN	81	79	P16403	Modeller	81:A	559	GTLVQTKGTGASGSFK	6	P16403	H12_HUMAN	97	90	P16403	Modeller	97:A	675	15.76	Intra	1	1	16	18195	4
IKLGLK	1	P16403	H12_HUMAN	81	79	P16403	Modeller	81:A	559	KALAAAGYDVEK	0	P16403	H12_HUMAN	64	63	P16403	Modeller	64:A	432	10.66	Intra	1	1	16	19608	4
IKLGLK	1	P16403	H12_HUMAN	81	79	P16403	Modeller	81:A	559	SGVSLAALKK	8	P16403	H12_HUMAN	63	54	P16403	Modeller	63:A	423	7.46	Intra	4	1	16	21200	4
KAASGEAKPK	0	P16403	H12_HUMAN	110	109	P16403	Modeller	110:A	765	GTGASGSFKLNK	8	P16403	H12_HUMAN	106	97	P16403	Modeller	106:A	731	9.95	Intra	3	1	16	9347	5
KAGGTPR	0	P16403	H12_HUMAN	27	26	P16403	Modeller	27:A	178	KASGPPVSELITK	0	P16403	H12_HUMAN	34	33	P16403	Modeller	34:A	225	11.83	Intra	1	1	16	15790	4
KASGPPVSELITK	0	P16403	H12_HUMAN	34	33	P16403	Modeller	34:A	225	ALAAAGYDVEKNNSR	10	P16403	H12_HUMAN	75	64	P16403	Modeller	75:A	509	26.23	Intra	4	1	16	20221	4
KPVGAAK	0	P16403	H12_HUMAN	130	129	P16403	Modeller	130:A	903	KAAGGATPK	0	P16403	H12_HUMAN	140	139	P16403	Modeller	140:A	974	31.51	Intra	2	1	16	6885	4
LGLKSLVSK	3	P16403	H12_HUMAN	85	81	P16403_P16403	Docking	85:A	588	LGLKSLVSK	3	P16403	H12_HUMAN	85	81	P16403_P16403	Docking	85:B	588	120.08	N/A	1	1	16	19602	4
LGLKSLVSK	3	P16403	H12_HUMAN	85	81	P16403	Modeller	85:A	588	SGVSLAALKK	8	P16403	H12_HUMAN	63	54	P16403	Modeller	63:A	423	9.5	Intra	1	1	16	23432	4
SGVSLAALKK	8	P16403	H12_HUMAN	63	54	P16403	Modeller	63:A	423	ALAAAGYDVEKNNSR	10	P16403	H12_HUMAN	75	64	P16403	Modeller	75:A	509	12.64	Intra	2	1	16	20176	4
SGVSLAALKK	8	P16403	H12_HUMAN	63	54	P16403	Modeller	63:A	423	GTLVQTKGTGASGSFK	6	P16403	H12_HUMAN	97	90	P16403	Modeller	97:A	675	16.81	Intra	1	1	16	20350	4
YVDKR	3	P16435	NCPR_HUMAN	190	186	3QE2	Structure	193:A	978	FAVFGLGNKTYEHFNAMGK	8	P16435	NCPR_HUMAN	176	167	3QE2	Structure	179:A	859	19.13	Intra	5	1	1	21867	4
IEVASSVKLCR	7	P16615	AT2A2_HUMAN	611	603	P16615	Phyre	611:A	4698	IGIFGQDEDVTSKAFTGR	12	P16615	AT2A2_HUMAN	650	637	P16615	Phyre	650:A	4989	18.73	Intra	4	1	2	25905	4
KSVQR	0	P16615	AT2A2_HUMAN	135	134	P16615	Phyre	135:A	1074	LTSIKSTTLR	4	P16615	AT2A2_HUMAN	169	164	P16615	Phyre	169:A	1329	17.56	Intra	2	1	2	13080	4
GAAKTR	3	P17096	HMGA1_HUMAN	71	67	P17096	Phyre	71:A	160	KTTTTPGR	0	P17096	HMGA1_HUMAN	74	73	P17096	Phyre	74:A	190	9.76	Intra	1	0.78	1	5872	4
MLMKWK	3	P17812	PYRG1_HUMAN	284	280	P17812	Phyre	284:A	2227	LSHYLQKGCR	6	P17812	PYRG1_HUMAN	557	550	P17812	Phyre	557:A	4421	26.61	Intra	2	1	1	16155	5
KAVAFSPVTELK	0	P17858	PFKAL_HUMAN	715	714	P17858	Phyre	715:A	5349	LGVKAMLWLSEK	3	P17858	PFKAL_HUMAN	681	677	P17858	Phyre	681:A	5078	15.25	Intra	1	1	2	30879	4
LGVKAMLWLSEK	3	P17858	PFKAL_HUMAN	681	677	P17858	Phyre	681:A	5078	KAVAFSPVTELKK	0	P17858	PFKAL_HUMAN	715	714	P17858	Phyre	715:A	5349	15.25	Intra	2	1	2	26945	5
VIVCNTKLDNNWGR	6	P17931	LEG3_HUMAN	176	169	1KJL	Structure	176:A	509	MLITILGTVKPNANR	9	P17931	LEG3_HUMAN	139	129	1KJL	Structure	139:A	202	26.64	Intra	1	1	1	28398	4
WIGLDLSNGKPR	9	P17987	TCPA_HUMAN	494	484	P17987_P50990	Docking	494:A	3690	ANEVISKLYAVHQEGNK	6	P50990	TCPQ_HUMAN	466	459	P17987_P50990	Docking	466:B	3422	20.55	1	4	1	1	24569	5
LACKEAVR	3	P17987	TCPA_HUMAN	126	122	P17987_P50991	Docking	126:A	876	TSLGPKGMDK	5	P50991	TCPD_HUMAN	55	49	P17987_P50991	Docking	55:B	243	17.71	1	2	1	2	13204	4
LACKEAVR	3	P17987	TCPA_HUMAN	126	122	P17987_P50991	Docking	126:A	876	TSLGPKGM[147.04]DK	5	P50991	TCPD_HUMAN	55	49	P17987_P50991	Docking	55:B	243	17.71	1	1	0.83	2	11536	4
LACKEAVR	3	P17987	TCPA_HUMAN	126	122	P17987_P78371	Docking	126:A	876	STLGPKGMDK	5	P78371	TCPB_HUMAN	46	40	P17987_P78371	Docking	46:B	223	18.14	1	2	0.97	1	13205	4
AIFAGYKR	6	P18077	RL35A_HUMAN	15	8	####		####	####	VIWGKVTR	4	P18077	RL35A_HUMAN	73	68	####		####	####	####	Intra	2	1	8	20202	4
CAYVYKAK	5	P18077	RL35A_HUMAN	52	46	####		####	####	LWSKAIFAGYK	3	P18077	RL35A_HUMAN	8	4	####		####	####	####	Intra	3	1	8	23550	4
LWSKAIFAGYK	3	P18077	RL35A_HUMAN	8	4	####		####	####	AKNNTVTPGGKPNK	1	P18077	RL35A_HUMAN	54	52	####		####	####	####	Intra	5	1	8	18463	5
LWSKAIFAGYK	3	P18077	RL35A_HUMAN	8	4	####		####	####	EHTALLKIEGVYAR	6	P18077	RL35A_HUMAN	29	22	####		####	####	####	Intra	7	1	8	26178	5
LWSKAIFAGYK	3	P18077	RL35A_HUMAN	8	4	####		####	####	NNTVTPGGKPNKTR	11	P18077	RL35A_HUMAN	66	54	####		####	####	####	Intra	1	1	8	18443	5
M[147.04]SGRLWSKAIFAGYK	7	P18077	RL35A_HUMAN	8	0	5T2C	Structure	####	####	MSGRLWSKAIFAGYK	7	P18077	RL35A_HUMAN	8	0	5T2C	Structure	####	####	####	N/A	2	1	8	27033	5
SNLPAKAIGHR	5	P18077	RL35A_HUMAN	95	89	####		####	####	LWSKAIFAGYK	3	P18077	RL35A_HUMAN	8	4	####		####	####	####	Intra	12	1	8	21008	5
SNLPAKAIGHR	5	P18077	RL35A_HUMAN	95	89	####		####	####	LWSKAIFAGYKR	3	P18077	RL35A_HUMAN	8	4	####		####	####	####	Intra	4	1	8	18823	5
KVVVVR	0	P40429	RL13A_HUMAN	32	31	5T2C	Structure	####	####	LWSKAIFAGYK	3	P18077	RL35A_HUMAN	8	4	5T2C	Structure	####	####	####	1	1	0.97	2	22926	4
KVVVVR	0	P40429	RL13A_HUMAN	32	31	5T2C	Structure	####	####	SNLPAKAIGHR	5	P18077	RL35A_HUMAN	95	89	5T2C	Structure	####	####	####	1	1	0.87	2	13928	5
IIKNEVK	2	P50914	RL14_HUMAN	124	121	5T2C	Structure	####	####	LWSKAIFAGYK	3	P18077	RL35A_HUMAN	8	4	5T2C	Structure	####	####	####	1	4	1	2	21858	4
KIEAR	0	P50914	RL14_HUMAN	94	93	5T2C	Structure	####	####	LWSKAIFAGYK	3	P18077	RL35A_HUMAN	8	4	5T2C	Structure	####	####	####	1	4	1	2	21274	4
FTTKRPNTFF	3	Q02543	RL18A_HUMAN	170	166	5T2C	Structure	####	####	LWSKAIFAGYK	3	P18077	RL35A_HUMAN	8	4	5T2C	Structure	####	####	####	1	2	1	2	27024	4
SNLPAKAIGHR	5	P18077	RL35A_HUMAN	95	89	5T2C	Structure	####	####	FTTKRPNTFF	3	Q02543	RL18A_HUMAN	170	166	5T2C	Structure	####	####	####	1	2	1	2	18311	5
VIWGKVTR	4	P18077	RL35A_HUMAN	73	68	5T2C	Structure	####	####	KPFSQHVR	0	Q02878	RL6_HUMAN	131	130	5T2C	Structure	####	####	####	1	3	1	4	15318	5
VIWGKVTR	4	P18077	RL35A_HUMAN	73	68	5T2C	Structure	####	####	RTHQKFVIATSTK	4	Q02878	RL6_HUMAN	192	187	5T2C	Structure	####	####	####	1	2	1	4	16463	5
VIWGKVTR	4	P18077	RL35A_HUMAN	73	68	5T2C	Structure	####	####	THQKFVIATSTK	3	Q02878	RL6_HUMAN	192	188	5T2C	Structure	####	####	####	1	37	1	4	17938	5
VVKLR	2	Q02878	RL6_HUMAN	108	105	5T2C	Structure	####	####	VIWGKVTR	4	P18077	RL35A_HUMAN	73	68	5T2C	Structure	####	####	####	1	1	0.73	4	18278	4
GINGVSPKVR	7	P18124	RL7_HUMAN	104	96	P18124	Phyre	104:A	865	FKEANNFLWPFK	1	P18124	RL7_HUMAN	202	200	P18124	Phyre	202:A	1669	23.23	Intra	6	1	8	27448	4
GYGKINK	3	P18124	RL7_HUMAN	161	157	P18124	Phyre	161:A	1340	FKEANNFLWPFK	1	P18124	RL7_HUMAN	202	200	P18124	Phyre	202:A	1669	13.91	Intra	2	1	8	26126	4
GYGKINK	3	P18124	RL7_HUMAN	161	157	P18124	Phyre	161:A	1340	KVLQLLR	0	P18124	RL7_HUMAN	107	106	P18124	Phyre	107:A	892	21.64	Intra	14	1	8	18771	4
KLIYEK	0	P18124	RL7_HUMAN	48	47	P18124	Phyre	48:A	394	HYHKEYR	3	P18124	RL7_HUMAN	59	55	P18124	Phyre	59:A	495	16.93	Intra	1	1	8	9858	5
KVLQLLR	0	P18124	RL7_HUMAN	107	106	P18124	Phyre	107:A	892	EANNFLWPFKLSSPR	9	P18124	RL7_HUMAN	212	202	P18124	Phyre	212:A	1759	19.2	Intra	2	1	8	32319	4
KVLQLLR	0	P18124	RL7_HUMAN	107	106	P18124	Phyre	107:A	892	FKEANNFLWPFK	1	P18124	RL7_HUMAN	202	200	P18124	Phyre	202:A	1669	19.24	Intra	7	1	8	31590	4
KVLQLLR	0	P18124	RL7_HUMAN	107	106	P18124	Phyre	107:A	892	GINGVSPKVR	7	P18124	RL7_HUMAN	104	96	P18124	Phyre	104:A	865	5.48	Intra	12	1	8	20667	4
KVLQLLR	0	P18124	RL7_HUMAN	107	106	P18124	Phyre	107:A	892	QIFNGTFVKLNK	8	P18124	RL7_HUMAN	124	115	P18124	Phyre	124:A	1036	18.5	Intra	2	1	8	25605	4
FAQKMLR	3	P18124	RL7_HUMAN	40	36	5T2C	Structure	####	####	LNPYAKTMR	5	P36578	RL4_HUMAN	333	327	5T2C	Structure	####	####	####	1	1	0.83	1	17354	4
GTWVQLKR	6	P46778	RL21_HUMAN	129	122	5T2C	Structure	####	####	FKEANNFLWPFK	1	P18124	RL7_HUMAN	202	200	5T2C	Structure	####	####	####	1	1	0.83	2	29353	4
KVLQLLR	0	P18124	RL7_HUMAN	107	106	5T2C	Structure	####	####	GTWVQLKR	6	P46778	RL21_HUMAN	129	122	5T2C	Structure	####	####	####	1	4	1	2	22970	4
EYKVVGR	2	Q02543	RL18A_HUMAN	11	8	5T2C	Structure	####	####	KAGNFYVPAEPK	0	P18124	RL7_HUMAN	77	76	5T2C	Structure	####	####	####	1	4	1	2	17594	4
GINGVSPKVR	7	P18124	RL7_HUMAN	104	96	5T2C	Structure	####	####	FWYFVSQLKK	8	Q02543	RL18A_HUMAN	52	43	5T2C	Structure	####	####	####	1	1	0.83	2	25032	4
KVLQLLR	0	P18124	RL7_HUMAN	107	106	5T2C	Structure	####	####	TNSTFNQVVLKR	10	Q07020	RL18_HUMAN	49	38	5T2C	Structure	####	####	####	1	2	1	1	22658	4
SFVVSKFR	5	P18583	SON_HUMAN	16	10	P18583	Phyre	16:A	####	SFVVSKFR	5	P18583	SON_HUMAN	16	10	P18583	Phyre	16:A	####	####	N/A	1	1	1	22945	4
VHFKNTR	3	P18621	RL17_HUMAN	27	23	P18621	Phyre	27:A	204	ETAQAIKGMHIR	6	P18621	RL17_HUMAN	37	30	P18621	Phyre	37:A	282	15.15	Intra	1	1	2	13233	5
VHFKNTR	3	P18621	RL17_HUMAN	27	23	P18621	Phyre	27:A	204	ETAQAIKGM[147.04]HIR	6	P18621	RL17_HUMAN	37	30	P18621	Phyre	37:A	282	15.15	Intra	1	0.94	2	10582	5
FSGWYDADLSPAGHEEAKR	17	P18669	PGAM1_HUMAN	39	21	4GPZ	Structure	39:B	2253	FSGWYDADLSPAGHEEAKR	17	P18669	PGAM1_HUMAN	39	21	4GPZ	Structure	39:A	302	21.06	1	3	1	3	21355	4
HGEAQVKIWR	6	P18669	PGAM1_HUMAN	113	106	4GPZ	Structure	113:A	895	HYGGLTGLNKAETAAK	9	P18669	PGAM1_HUMAN	100	90	4GPZ	Structure	100:A	802	10.34	Intra	15	1	3	16112	4
KAMEAVAAQGK	0	P18669	PGAM1_HUMAN	241	240	4GPZ	Structure	241:A	1930	HYGGLTGLNKAETAAK	9	P18669	PGAM1_HUMAN	100	90	4GPZ	Structure	100:A	802	24.55	Intra	1	1	3	14622	5
EAPIDKK	5	P19105	ML12A_HUMAN	149	143	P19105_P35579	Docking	149:A	1203	LFTKVKPLLQVSR	3	P35579	MYH9_HUMAN	833	829	P19105_P35579	Docking	833:B	6639	16.53	1	4	1	2	19342	5
HGAKDKDD	3	P19105	ML12A_HUMAN	167	163	P19105_P35579	Docking	167:A	1354	LFTKVKPLLQVSR	3	P35579	MYH9_HUMAN	833	829	P19105_P35579	Docking	833:B	6639	14.16	1	7	1	2	17079	5
EALNSCNKR	7	P19338	NUCL_HUMAN	545	537	P19338	Phyre	545:A	1766	GGKNSTWSGESK	2	P19338	NUCL_HUMAN	477	474	P19338	Phyre	477:A	1280	21.57	Intra	2	1	8	9746	4
GGKNSTWSGESK	2	P19338	NUCL_HUMAN	477	474	P19338	Phyre	477:A	1280	VFGNEIKLEKPK	6	P19338	NUCL_HUMAN	377	370	P19338	Phyre	377:A	557	47.99	Intra	1	1	8	15137	5
LVSKDGK	3	P19338	NUCL_HUMAN	424	420	2KRR	Structure	125:A	1970	SKGIAYIEFK	1	P19338	NUCL_HUMAN	429	427	2KRR	Structure	130:A	2044	6.85	Intra	2	1	8	20131	4
LVSKDGK	3	P19338	NUCL_HUMAN	424	420	2KRR	Structure	125:A	1970	TLLAKNLPYK	4	P19338	NUCL_HUMAN	398	393	2KRR	Structure	99:A	1541	15.68	Intra	2	1	8	18719	4
LVSKDGK	3	P19338	NUCL_HUMAN	424	420	2KRR	Structure	125:A	1970	VFGNEIKLEKPK	6	P19338	NUCL_HUMAN	377	370	2KRR	Structure	78:A	1184	13.47	Intra	3	1	8	15003	5
SKGIAYIEFK	1	P19338	NUCL_HUMAN	429	427	2KRR	Structure	130:A	2044	TLLAKNLPYK	4	P19338	NUCL_HUMAN	398	393	2KRR	Structure	99:A	1541	9.47	Intra	2	1	8	25251	4
TLLAKNLPYK	4	P19338	NUCL_HUMAN	398	393	P19338	Phyre	398:A	649	GGKNSTWSGESK	2	P19338	NUCL_HUMAN	477	474	P19338	Phyre	477:A	1280	20.76	Intra	1	1	8	18696	4
VFGNEIKLEKPK	6	P19338	NUCL_HUMAN	377	370	2KRR	Structure	78:A	1184	KFGYVDFESAEDLEK	0	P19338	NUCL_HUMAN	348	347	2KRR	Structure	49:A	731	10.3	Intra	1	1	8	22676	4
FAKLLLR	2	P19793	RXRA_HUMAN	417	414	3DZY	Structure	417:A	2091	VLTELVSKMR	7	P19793	RXRA_HUMAN	356	348	3DZY	Structure	356:A	1605	9.96	Intra	2	1	1	26223	4
FQQKQIENVLR	3	P20042	IF2B_HUMAN	265	261	P20042	Phyre	265:A	693	YIKEYVTCHTCR	2	P20042	IF2B_HUMAN	276	273	P20042	Phyre	276:A	793	16.35	Intra	2	1	1	17830	5
ICIVTKEGIR	5	P20618	PSB1_HUMAN	228	222	5LE5	Structure	200:Z	45129	LVKDVFISAAER	2	P20618	PSB1_HUMAN	204	201	5LE5	Structure	176:Z	44944	22.62	Intra	1	1	1	25171	4
LVKDVFISAAER	2	P20618	PSB1_HUMAN	204	201	5LE5	Structure	176:Z	44944	LDFLRPYTVPNKK	11	Q99436	PSB7_HUMAN	237	225	5LE5	Structure	209:L	21070	97.65	1	8	1	1	25123	5
SLEDDPKLVHSMQVAK	6	P20929	NEBU_HUMAN	2086	2079	1NEB	Structure	####	####	SLEDDPKLVHSMQVAK	6	P20929	NEBU_HUMAN	2086	2079	1NEB	Structure	####	####	####	N/A	1	0.79	1	31930	4
IKVSGLGEK	1	P21333	FLNA_HUMAN	975	973	####		####	####	VDVGKDQEFTVKSK	11	P21333	FLNA_HUMAN	994	982	####		####	####	####	Intra	2	1	3	15691	4
SKGAGGQGK	1	P21333	FLNA_HUMAN	996	994	####		####	####	IKVSGLGEK	1	P21333	FLNA_HUMAN	975	973	####		####	####	####	Intra	5	1	3	11432	4
YTILIKYGGDEIPFSPYR	5	P21333	FLNA_HUMAN	1621	1615	####		####	####	KTHIQDNHDGTYTVAYVPDVTGR	0	P21333	FLNA_HUMAN	1593	1592	####		####	####	####	Intra	3	1	3	26461	5
KLGGDPEK	0	P21399	ACOC_HUMAN	106	105	2B3Y	Structure	106:A	843	LFFWNSKSTYIK	6	P21399	ACOC_HUMAN	639	632	2B3Y	Structure	639:A	4972	23.35	Intra	3	1	1	23598	4
IATGSFLKR	7	P22234	PUR6_HUMAN	110	102	2H31	Structure	####	####	IATGSFLKR	7	P22234	PUR6_HUMAN	110	102	2H31	Structure	####	####	####	1	2	1	8	20100	4
IATGSFLKR	7	P22234	PUR6_HUMAN	110	102	2H31	Structure	110:A	671	KNFEWVAER	0	P22234	PUR6_HUMAN	247	246	2H31	Structure	247:A	1620	22.17	Intra	2	1	8	21101	4
IATGSFLKR	7	P22234	PUR6_HUMAN	110	102	2H31	Structure	110:A	671	KNHLEGKAAISNK	6	P22234	PUR6_HUMAN	53	46	2H31	Structure	53:A	232	30.53	Intra	2	1	8	13477	5
KACGNFGIPCELR	0	P22234	PUR6_HUMAN	286	285	2H31	Structure	286:A	1930	ITSCIFQLLQEAGIKTAFTR	14	P22234	PUR6_HUMAN	74	59	2H31	Structure	74:A	388	21.82	Intra	2	1	8	39279	4
KACGNFGIPCELR	0	P22234	PUR6_HUMAN	286	285	2H31	Structure	286:A	1930	VTSAHKGPDETLR	5	P22234	PUR6_HUMAN	304	298	2H31	Structure	304:A	2061	27.59	Intra	1	1	8	16831	5
KNFEWVAER	0	P22234	PUR6_HUMAN	247	246	2H31	Structure	####	####	KNFEWVAER	0	P22234	PUR6_HUMAN	247	246	2H31	Structure	####	####	####	1	1	1	8	22144	4
KNHLEGK	0	P22234	PUR6_HUMAN	47	46	####		####	####	IATGSFLKR	7	P22234	PUR6_HUMAN	110	102	P22234	Unknown	110:A	671	####	Intra	1	1	8	13200	5
VTSAHKGPDETLR	5	P22234	PUR6_HUMAN	304	298	2H31	Structure	304:A	2061	ITSCIFQLLQEAGIKTAFTR	14	P22234	PUR6_HUMAN	74	59	2H31	Structure	74:A	388	48.52	Intra	1	1	8	34315	4
GIKLVVADTR	2	P22314	UBA1_HUMAN	185	182	4P22	Structure	185:A	1051	QLYVLGHEAMKR	10	P22314	UBA1_HUMAN	68	57	4P22	Structure	68:A	148	23.02	Intra	5	1	3	20557	4
KISFK	0	P22314	UBA1_HUMAN	300	299	P22314	Phyre	300:A	1918	GIKLVVADTR	2	P22314	UBA1_HUMAN	185	182	P22314	Phyre	185:A	1059	14.63	Intra	4	1	3	19977	4
SKLIAGK	1	P22314	UBA1_HUMAN	884	882	P22314	Phyre	884:A	6433	NIILGGVKAVTLHDQGTAQWADLSSQFYLR	7	P22314	UBA1_HUMAN	97	89	P22314	Phyre	97:A	364	27.47	Intra	3	1	3	30210	4
TFIAIKPDGVQR	5	P22392	NDKB_HUMAN	12	6	1NSK	Structure	12:R	83	NIIHGSDSVKSAEK	9	P22392	NDKB_HUMAN	124	114	1NSK	Structure	124:R	963	21.25	Intra	6	1	1	17560	5
DPASKR	4	P22626	ROA2_HUMAN	59	54	5WWG	Structure	59:A	416	KLFIGGLSFETTEESLR	0	P22626	ROA2_HUMAN	22	21	5WWG	Structure	22:A	100	22.77	Intra	1	1	13	27178	4
DPASKR	4	P22626	ROA2_HUMAN	59	54	5WWG	Structure	59:A	416	VVEPKR	4	P22626	ROA2_HUMAN	94	89	5WWG	Structure	94:A	680	23.43	Intra	6	1	13	8406	4
EESGKPGAHVTVK	4	P22626	ROA2_HUMAN	104	99	5WWG	Structure	104:A	762	IVLQKYHTINGHNAEVR	4	P22626	ROA2_HUMAN	173	168	5WWG	Structure	173:A	1324	15.17	Intra	6	1	13	12474	6
EKEQFR	1	P22626	ROA2_HUMAN	17	15	5WWG	Structure	17:A	51	EESGKPGAHVTVK	4	P22626	ROA2_HUMAN	104	99	5WWG	Structure	104:A	762	20.9	Intra	3	1	13	10359	5
EKEQFR	1	P22626	ROA2_HUMAN	17	15	5WWG	Structure	17:A	51	IVLQKYHTINGHNAEVR	4	P22626	ROA2_HUMAN	173	168	5WWG	Structure	173:A	1324	13.92	Intra	14	1	13	14236	6
EKEQFR	1	P22626	ROA2_HUMAN	17	15	5WWG	Structure	17:A	51	NYYEQWGKLTDCVVMR	7	P22626	ROA2_HUMAN	46	38	5WWG	Structure	46:A	303	14.95	Intra	1	1	13	24498	4
KLFVGGIK	0	P22626	ROA2_HUMAN	113	112	P22626	Phyre	113:A	834	EESGKPGAHVTVK	4	P22626	ROA2_HUMAN	104	99	P22626	Phyre	104:A	769	16.61	Intra	2	1	13	16106	5
KLFVGGIK	0	P22626	ROA2_HUMAN	113	112	P22626	Phyre	113:A	834	IVLQKYHTINGHNAEVR	4	P22626	ROA2_HUMAN	173	168	P22626	Phyre	173:A	1363	15.41	Intra	6	1	13	18350	6
LTDCVVMRDPASKR	12	P22626	ROA2_HUMAN	59	46	5WWG	Structure	59:A	416	KLFIGGLSFETTEESLR	0	P22626	ROA2_HUMAN	22	21	5WWG	Structure	22:A	100	22.77	Intra	2	1	13	25605	4
VVEPKR	4	P22626	ROA2_HUMAN	94	89	5WWG	Structure	94:A	680	EESGKPGAHVTVK	4	P22626	ROA2_HUMAN	104	99	5WWG	Structure	104:A	762	17.16	Intra	3	1	13	9509	5
VVEPKR	4	P22626	ROA2_HUMAN	94	89	5WWG	Structure	94:A	680	EKEQFR	1	P22626	ROA2_HUMAN	17	15	5WWG	Structure	17:A	51	16.98	Intra	2	1	13	10467	4
VVEPKR	4	P22626	ROA2_HUMAN	94	89	5WWG	Structure	94:A	680	IVLQKYHTINGHNAEVR	4	P22626	ROA2_HUMAN	173	168	5WWG	Structure	173:A	1324	16.84	Intra	1	1	13	12755	6
VVEPKR	4	P22626	ROA2_HUMAN	94	89	P22626	Phyre	94:A	693	KLFVGGIK	0	P22626	ROA2_HUMAN	113	112	P22626	Phyre	113:A	834	24.31	Intra	3	1	13	17209	4
IGLFIKAGSR	5	P22695	QCR2_HUMAN	66	60	5XTE	Structure	66:W	26857	GGLGLSGAKANYR	8	P22695	QCR2_HUMAN	250	241	5XTE	Structure	250:W	28285	14.7	Intra	3	1	1	22331	4
GKGFGFIK	1	P23246	SFPQ_HUMAN	332	330	4WIJ	Structure	332:B	2802	GIVEFASKPAAR	7	P23246	SFPQ_HUMAN	421	413	4WIJ	Structure	421:B	3491	18.22	Intra	4	1	4	22516	4
KAFER	0	P23246	SFPQ_HUMAN	426	425	4WIJ	Structure	426:A	1058	GIVEFASKPAAR	7	P23246	SFPQ_HUMAN	421	413	4WIJ	Structure	421:A	1021	8.85	Intra	2	1	4	17145	4
KAFER	0	P23246	SFPQ_HUMAN	426	425	P23246	Phyre	426:A	1054	RPGEKTYTQR	4	P23246	SFPQ_HUMAN	291	286	####		####	####	####	Intra	3	1	4	8771	4
RPGEKTYTQR	4	P23246	SFPQ_HUMAN	291	286	####		####	####	ISDSEGFKANLSLLR	7	P23246	SFPQ_HUMAN	279	271	####		####	####	####	Intra	3	1	4	19691	5
FPDENFKLK	6	P23284	PPIB_HUMAN	129	122	3ICH	Structure	97:A	741	VIFGLFGKTVPK	7	P23284	PPIB_HUMAN	67	59	3ICH	Structure	35:A	236	11.09	Intra	6	1	6	28411	4
KVESTKTDSR	5	P23284	PPIB_HUMAN	186	180	3ICH	Structure	154:A	1189	VIKDFMIQGGDFTR	2	P23284	PPIB_HUMAN	98	95	3ICH	Structure	66:A	485	9.92	Intra	1	1	6	18751	4
NSKFHR	2	P23284	PPIB_HUMAN	92	89	3ICH	Structure	60:A	424	GDGTGGKSIYGER	6	P23284	PPIB_HUMAN	116	109	3ICH	Structure	84:A	628	14.45	Intra	6	1	6	10815	5
TAWLDGKHVVFGK	6	P23284	PPIB_HUMAN	165	158	3ICH	Structure	133:A	1024	LKHYGPGWVSMANAGK	1	P23284	PPIB_HUMAN	131	129	3ICH	Structure	99:A	758	9.83	Intra	1	1	6	21237	5
VIFGLFGKTVPK	7	P23284	PPIB_HUMAN	67	59	3ICH	Structure	35:A	236	IEVEKPFAIAKE	10	P23284	PPIB_HUMAN	215	204	3ICH	Structure	183:A	1417	15.26	Intra	2	1	6	30506	4
VIFGLFGKTVPK	7	P23284	PPIB_HUMAN	67	59	3ICH	Structure	35:A	236	LKHYGPGWVSMANAGK	1	P23284	PPIB_HUMAN	131	129	3ICH	Structure	99:A	758	15.17	Intra	1	1	6	25287	5
GDGTGGKSIYGER	6	P23284	PPIB_HUMAN	116	109	P23284_Q32P28	Docking	116:A	661	SPYNYLQVAYFKINK	11	Q32P28	P3H1_HUMAN	155	143	P23284_Q32P28	Docking	155:B	903	28.04	2	3	1	1	26957	4
MLVSLKMSYK	5	P23381	SYWC_HUMAN	47	41	5UJJ	Structure	47:A	291	SLKAGNASKDEIDSAVK	2	P23381	SYWC_HUMAN	27	24	5UJJ	Structure	27:A	148	18.85	Intra	1	0.82	2	19490	4
NVVKIQK	3	P23381	SYWC_HUMAN	253	249	5UJJ	Structure	253:A	1833	KPFYLYTGR	0	P23381	SYWC_HUMAN	154	153	5UJJ	Structure	154:A	1026	25.75	Intra	3	1	2	18687	4
ELTAVVQKR	7	P23396	RS3_HUMAN	75	67	P23396	Phyre	75:A	589	YKLLGGLAVR	1	P23396	RS3_HUMAN	108	106	P23396	Phyre	108:A	846	34.69	Intra	4	1	7	22768	4
KFVADGIFK	0	P23396	RS3_HUMAN	10	9	P23396	Phyre	10:A	74	YKLLGGLAVR	1	P23396	RS3_HUMAN	108	106	P23396	Phyre	108:A	846	42.4	Intra	4	1	7	26912	4
TQNVLGEKGR	7	P23396	RS3_HUMAN	62	54	1WH9	Structure	####	####	TQNVLGEKGR	7	P23396	RS3_HUMAN	62	54	1WH9	Structure	####	####	####	N/A	1	1	7	20018	4
YKLLGGLAVR	1	P23396	RS3_HUMAN	108	106	P23396	Phyre	108:A	846	FGFPEGSVELYAEKVATR	13	P23396	RS3_HUMAN	90	76	P23396	Phyre	90:A	711	22.44	Intra	6	1	7	32722	4
YKLLGGLAVR	1	P23396	RS3_HUMAN	108	106	P23396	Phyre	108:A	846	KPLPDHVSIVEPK	0	P23396	RS3_HUMAN	202	201	P23396	Phyre	202:A	1563	34.4	Intra	3	1	7	22712	5
YKLLGGLAVR	1	P23396	RS3_HUMAN	108	106	P23396	Phyre	108:A	846	TQNVLGEKGR	7	P23396	RS3_HUMAN	62	54	P23396	Phyre	62:A	483	27.78	Intra	3	1	7	21834	4
YKLLGGLAVR	1	P23396	RS3_HUMAN	108	106	P23396	Phyre	108:A	846	TQNVLGEKGRR	7	P23396	RS3_HUMAN	62	54	P23396	Phyre	62:A	483	27.78	Intra	1	1	7	19213	5
KLTGIK	0	P23528	COF1_HUMAN	127	126	5L6W	Structure	127:C	3117	KSSTPEEVK	0	P23528	COF1_HUMAN	22	21	5L6W	Structure	22:C	2362	20.81	Intra	2	1	5	11258	4
KLTGIK	0	P23528	COF1_HUMAN	127	126	5L6W	Structure	127:C	3117	VFNDMKVR	5	P23528	COF1_HUMAN	19	13	5L6W	Structure	19:C	2340	13.4	Intra	3	1	5	16441	4
KSSTPEEVK	0	P23528	COF1_HUMAN	22	21	5L6W	Structure	####	####	KSSTPEEVK	0	P23528	COF1_HUMAN	22	21	5L6W	Structure	####	####	####	N/A	1	1	5	14266	4
KSSTPEEVK	0	P23528	COF1_HUMAN	22	21	5L6W	Structure	22:C	2362	VFNDMKVR	5	P23528	COF1_HUMAN	19	13	5L6W	Structure	19:C	2340	8.77	Intra	4	1	5	14176	4
VFNDMKVR	5	P23528	COF1_HUMAN	19	13	5L6W	Structure	####	####	VFNDMKVR	5	P23528	COF1_HUMAN	19	13	5L6W	Structure	####	####	####	N/A	5	1	5	14263	4
IKIIAPPER	1	P68032	ACTC_HUMAN	330	328	P23528_P68032	Docking	330:B	2546	HELQANCYEEVKDR	11	P23528	COF1_HUMAN	144	132	P23528_P68032	Docking	144:A	3241	18.61	1	2	1	1	16576	5
TVWEISQKTVLK	7	P23921	RIR1_HUMAN	689	681	3HNC	Structure	689:B	10892	LTSMHFYGWKQGLK	9	P23921	RIR1_HUMAN	729	719	3HNC	Structure	729:B	11212	11.12	Intra	7	1	3	24676	5
TVWEISQKTVLK	7	P23921	RIR1_HUMAN	689	681	3HNC	Structure	689:B	10892	LTSM[147.04]HFYGWKQGLK	9	P23921	RIR1_HUMAN	729	719	3HNC	Structure	729:B	11212	11.12	Intra	3	1	3	22702	4
VMFDKITSR	4	P23921	RIR1_HUMAN	17	12	3HNC	Structure	17:B	5719	IAVSNLHKETK	7	P23921	RIR1_HUMAN	88	80	3HNC	Structure	88:B	6232	17.53	Intra	2	1	3	16827	5
TKQTAR	1	P68431	H31_HUMAN	5	3	5AV9	Structure	####	####	LQAVKDKAR	6	P24043	LAMA2_HUMAN	2040	2033	4YEQ	Structure	####	####	####	2	2	0.88	1	9060	4
AKKPALVAK	1	P24534	EF1B_HUMAN	132	130	P24534	Phyre	132:A	349	LAQYESKK	6	P24534	EF1B_HUMAN	129	122	P24534	Phyre	129:A	326	7.28	Intra	1	1	3	10125	5
EKASLPGVK	1	P24534	EF1B_HUMAN	66	64	5DQS	Structure	66:D	2120	WYNHIKSYEK	5	P24534	EF1B_HUMAN	60	54	5DQS	Structure	60:D	2070	9.27	Intra	8	1	3	15310	4
KPALVAK	0	P24534	EF1B_HUMAN	133	132	P24534	Phyre	133:A	358	LAQYESKK	6	P24534	EF1B_HUMAN	129	122	P24534	Phyre	129:A	326	10.68	Intra	3	1	3	12330	4
KFPAGK	0	P26641	EF1G_HUMAN	52	51	5JPO	Structure	52:A	417	WYNHIKSYEK	5	P24534	EF1B_HUMAN	60	54	5DQS	Structure	60:D	2070	####	1	5	0.99	2	13371	5
WYNHIKSYEK	5	P24534	EF1B_HUMAN	60	54	5DQS	Structure	60:D	2070	ILGLLDAYLKTR	9	P26641	EF1G_HUMAN	147	137	5JPO	Structure	147:A	1157	####	1	1	0.97	2	25215	4
EKASLPGVK	1	P24534	EF1B_HUMAN	66	64	5DQS	Structure	66:D	2120	YECKIGGSPEIK	3	Q8WZ42	TITIN_HUMAN	8255	8251	1TKI	Structure	####	####	####	2	5	0.99	1	16176	5
LKTVFQK	1	P24752	THIL_HUMAN	268	266	2IB8	Structure	268:B	4643	GSTPYGGVKLEDLIVK	8	P24752	THIL_HUMAN	174	165	2IB8	Structure	174:B	3899	25.94	Intra	1	0.95	1	26952	4
LIAAATSVLKTR	9	P24863	CCNC_HUMAN	117	107	4F6U	Structure	117:B	3750	FSYAFPKEFPYR	6	P24863	CCNC_HUMAN	126	119	4F6U	Structure	126:B	3829	8.35	Intra	1	0.91	1	27755	4
KYEKLETEEER	3	P25098	ARBK1_HUMAN	94	90	3V5W	Structure	94:A	552	IFSQKLGYLLFR	4	P25098	ARBK1_HUMAN	62	57	3V5W	Structure	62:A	269	17.34	Intra	3	1	2	26691	4
YEKLETEEER	2	P25098	ARBK1_HUMAN	94	91	3V5W	Structure	94:A	552	IFSQKLGYLLFR	4	P25098	ARBK1_HUMAN	62	57	3V5W	Structure	62:A	269	17.34	Intra	2	1	2	30291	4
EAAKALDKR	3	P25398	RS12_HUMAN	40	36	P25398	Phyre	40:A	226	LGEWVGLCKIDR	8	P25398	RS12_HUMAN	93	84	P25398	Phyre	93:A	640	26.62	Intra	5	1	2	19138	5
KVVGCSCVVVK	0	P25398	RS12_HUMAN	102	101	P25398	Phyre	102:A	716	LGEWVGLCKIDR	8	P25398	RS12_HUMAN	93	84	P25398	Phyre	93:A	640	8.22	Intra	5	1	2	23630	4
AMKQVAGTMK	2	P25705	ATPA_HUMAN	427	424	P25705	Phyre	427:A	2731	ADGKISEQSDAK	3	P25705	ATPA_HUMAN	531	527	P25705	Phyre	531:A	3535	8.95	Intra	3	1	4	12118	4
AMKQVAGTM[147.04]K	2	P25705	ATPA_HUMAN	427	424	P25705	Phyre	427:A	2731	ADGKISEQSDAK	3	P25705	ATPA_HUMAN	531	527	P25705	Phyre	531:A	3535	8.95	Intra	2	1	4	10238	4
AM[147.04]KQVAGTMK	2	P25705	ATPA_HUMAN	427	424	P25705	Phyre	427:A	2731	ADGKISEQSDAK	3	P25705	ATPA_HUMAN	531	527	P25705	Phyre	531:A	3535	8.95	Intra	3	1	4	10365	4
GYLDKLEPSK	4	P25705	ATPA_HUMAN	498	493	P25705_P25705	Docking	498:A	3279	GYLDKLEPSK	4	P25705	ATPA_HUMAN	498	493	P25705_P25705	Docking	498:B	3279	49.93	1	1	1	4	26326	4
DIREEAEKYAK	7	P25788	PSA3_HUMAN	238	230	5LE5	Structure	237:F	11023	LVLSKLYEEGSNKR	4	P25788	PSA3_HUMAN	57	52	5LE5	Structure	56:F	9574	21.38	Intra	2	1	2	18845	5
IIYIVHDEVKDK	9	P25788	PSA3_HUMAN	206	196	5LE5	Structure	205:F	10746	LVLSKLYEEGSNKR	4	P25788	PSA3_HUMAN	57	52	5LE5	Structure	56:F	9574	16.63	Intra	3	1	2	20098	5
YEAANWKYK	6	P60900	PSA6_HUMAN	102	95	5LE5	Structure	102:U	36132	SNFGYNIPLKHLADR	9	P25788	PSA3_HUMAN	110	100	5LE5	Structure	110:G	11952	89.78	1	2	0.96	1	21700	5
DKYKTLR	3	P26038	MOES_HUMAN	557	553	P26038	Phyre	557:A	4135	HLKALTSELANAR	2	P26038	MOES_HUMAN	523	520	P26038	Phyre	523:A	3866	20.05	Intra	1	1	6	15523	5
DKYKTLR	3	P26038	MOES_HUMAN	557	553	P26038	Phyre	557:A	4135	LTPKIGFPWSEIR	3	P26038	MOES_HUMAN	237	233	P26038	Phyre	237:A	1934	11.92	Intra	2	1	6	24649	4
ESPLLFKFR	6	P26038	MOES_HUMAN	79	72	1E5W	Structure	79:A	637	LNKDQWEER	2	P26038	MOES_HUMAN	165	162	1E5W	Structure	165:A	1341	32.28	Intra	2	1	6	24109	4
FVIKPIDK	3	P26038	MOES_HUMAN	258	254	1E5W	Structure	258:A	2129	KAPDFVFYAPR	0	P26038	MOES_HUMAN	263	262	1E5W	Structure	263:A	2170	8.83	Intra	2	1	6	25351	4
LNKDQWEER	2	P26038	MOES_HUMAN	165	162	1E5W	Structure	165:A	1341	SGYLAGDKLLPQR	7	P26038	MOES_HUMAN	151	143	1E5W	Structure	151:A	1221	11.05	Intra	1	1	6	21046	4
YKTLR	1	P26038	MOES_HUMAN	557	555	P26038	Phyre	557:A	4135	LTPKIGFPWSEIR	3	P26038	MOES_HUMAN	237	233	P26038	Phyre	237:A	1934	11.92	Intra	2	1	6	26073	4
KPSAPK	0	P26373	RL13_HUMAN	130	129	P26373	Phyre	130:A	1058	KGDSSAEELK	0	P26373	RL13_HUMAN	136	135	P26373	Phyre	136:A	1101	11.6	Intra	2	1	13	8832	4
KPSAPK	0	P26373	RL13_HUMAN	130	129	P26373	Phyre	130:A	1058	LKEYR	1	P26373	RL13_HUMAN	118	116	P26373	Phyre	118:A	949	26.09	Intra	1	1	13	9036	4
KPSAPK	0	P26373	RL13_HUMAN	130	129	P26373	Phyre	130:A	1058	SKLILFPR	1	P26373	RL13_HUMAN	123	121	P26373	Phyre	123:A	996	20.61	Intra	7	1	13	19978	4
LKEYR	1	P26373	RL13_HUMAN	118	116	P26373	Phyre	118:A	949	NFKAFASLR	2	P26373	RL13_HUMAN	177	174	P26373	Phyre	177:A	1425	45.25	Intra	2	1	13	19166	4
LKEYR	1	P26373	RL13_HUMAN	118	116	P26373	Phyre	118:A	949	NKSTESLQANVQR	1	P26373	RL13_HUMAN	105	103	P26373	Phyre	105:A	847	20.45	Intra	2	1	13	11884	4
LKEYR	1	P26373	RL13_HUMAN	118	116	P26373	Phyre	118:A	949	SKLILFPR	1	P26373	RL13_HUMAN	123	121	P26373	Phyre	123:A	996	8.61	Intra	20	1	13	21393	4
NVYKK	3	P26373	RL13_HUMAN	162	158	P26373	Phyre	162:A	1296	SKLILFPR	1	P26373	RL13_HUMAN	123	121	P26373	Phyre	123:A	996	28.06	Intra	4	1	13	20413	4
SKLILFPR	1	P26373	RL13_HUMAN	123	121	P26373	Phyre	123:A	996	AKEAAEQDVEK	1	P26373	RL13_HUMAN	200	198	P26373	Phyre	200:A	1605	62.83	Intra	1	1	13	21402	4
SKLILFPR	1	P26373	RL13_HUMAN	123	121	P26373	Phyre	123:A	996	KGDSSAEELK	0	P26373	RL13_HUMAN	136	135	P26373	Phyre	136:A	1101	14.29	Intra	2	1	13	22361	4
SKLILFPR	1	P26373	RL13_HUMAN	123	121	P26373	Phyre	123:A	996	NFKAFASLR	2	P26373	RL13_HUMAN	177	174	P26373	Phyre	177:A	1425	51.26	Intra	1	1	13	27361	4
SKLILFPR	1	P26373	RL13_HUMAN	123	121	P26373	Phyre	123:A	996	NKSTESLQANVQR	1	P26373	RL13_HUMAN	105	103	P26373	Phyre	105:A	847	28.17	Intra	7	1	13	21090	4
SKLILFPR	1	P26373	RL13_HUMAN	123	121	P26373	Phyre	123:A	996	VITEEEKNFKAFASLR	9	P26373	RL13_HUMAN	177	167	P26373	Phyre	177:A	1425	51.26	Intra	1	1	13	26602	4
YHTKVR	3	P26373	RL13_HUMAN	69	65	P26373	Phyre	69:A	563	SKLILFPR	1	P26373	RL13_HUMAN	123	121	P26373	Phyre	123:A	996	26.71	Intra	11	1	13	18274	4
DVQKLR	3	Q8TDN6	BRX1_HUMAN	288	284	####		####	####	SKLILFPR	1	P26373	RL13_HUMAN	123	121	P26373	Phyre	123:A	996	####	1	1	0.87	1	22511	4
SKLILFPR	1	P26373	RL13_HUMAN	123	121	5T2C	Structure	####	####	INKMLSCAGADR	2	Q96L21	RL10L_HUMAN	101	98	5T2C	Structure	####	####	####	1	1	0.95	1	22984	4
ELPSFLGKR	7	P26447	S10A4_HUMAN	48	40	3C1V	Structure	48:C	2013	ALDVMVSTFHKYSGK	10	P26447	S10A4_HUMAN	18	7	3C1V	Structure	18:C	1760	22.88	Intra	4	1	1	24986	5
KCSER	0	P26583	HMGB2_HUMAN	44	43	P26583	Phyre	44:A	366	KHPDSSVNFAEFSK	0	P26583	HMGB2_HUMAN	30	29	P26583	Phyre	30:A	246	17.01	Intra	2	1	1	13554	5
VKILFNK	1	P26599	PTBP1_HUMAN	368	366	####		####	####	ITLSKHQNVQLPR	4	P26599	PTBP1_HUMAN	410	405	####		####	####	####	Intra	6	1	2	18961	5
VKILFNKK	1	P26599	PTBP1_HUMAN	368	366	####		####	####	ITLSKHQNVQLPR	4	P26599	PTBP1_HUMAN	410	405	####		####	####	####	Intra	6	1	2	16833	5
EKISGTVNIR	1	P26639	SYTC_HUMAN	681	679	4HWT	Structure	714:B	6229	QVMVVPVGPTCDEYAQKVR	16	P26639	SYTC_HUMAN	636	619	4HWT	Structure	669:B	5864	9.81	Intra	1	1	3	22467	4
FQEEAKNR	5	P26639	SYTC_HUMAN	319	313	P26639	Phyre	319:A	1880	IHKNSSTYWEGK	2	P26639	SYTC_HUMAN	279	276	P26639	Phyre	279:A	1542	15.46	Intra	1	1	3	11061	4
IHKNSSTYWEGK	2	P26639	SYTC_HUMAN	279	276	P26639	Phyre	279:A	1542	ILNEKVNTPTTTVYR	4	P26639	SYTC_HUMAN	243	238	P26639	Phyre	243:A	1261	28.44	Intra	3	1	3	16003	4
WKEEKGDR	4	P26640	SYVC_HUMAN	423	418	P26640	Phyre	423:A	979	KLGSSLDWDR	0	P26640	SYVC_HUMAN	433	432	P26640	Phyre	433:A	1067	15.45	Intra	1	1	1	15037	5
KFPAGK	0	P26641	EF1G_HUMAN	52	51	5JPO	Structure	52:D	5484	ILGLLDAYLKTR	9	P26641	EF1G_HUMAN	147	137	5JPO	Structure	147:D	6227	43.61	Intra	6	1	1	27359	4
KLQIGVK	0	P26885	FKBP2_HUMAN	30	29	####		####	####	KLVIPSELGYGER	0	P26885	FKBP2_HUMAN	103	102	####		####	####	####	Intra	4	1	3	22658	4
KLQIGVKK	6	P26885	FKBP2_HUMAN	36	29	####		####	####	KLVIPSELGYGER	0	P26885	FKBP2_HUMAN	103	102	####		####	####	####	Intra	5	1	3	19987	4
LQIGVKK	5	P26885	FKBP2_HUMAN	36	30	####		####	####	KLVIPSELGYGER	0	P26885	FKBP2_HUMAN	103	102	####		####	####	####	Intra	4	1	3	22200	4
KLQLIK	0	P27348	1433T_HUMAN	75	74	5IQP	Structure	75:A	569	VISSIEQKTDTSDK	7	P27348	1433T_HUMAN	68	60	5IQP	Structure	68:A	529	12.85	Intra	1	1	3	19183	4
VFYLKMK	4	P27348	1433T_HUMAN	120	115	5IQP	Structure	120:A	940	NLLSVAYKNVVGGR	7	P27348	1433T_HUMAN	49	41	5IQP	Structure	49:A	379	12.6	Intra	6	1	3	28189	4
VFYLKM[147.04]K	4	P27348	1433T_HUMAN	120	115	5IQP	Structure	120:A	940	NLLSVAYKNVVGGR	7	P27348	1433T_HUMAN	49	41	5IQP	Structure	49:A	379	12.6	Intra	4	1	3	26082	4
AWIKK	3	P27695	APEX1_HUMAN	77	73	3U8U	Structure	77:D	6710	SKNVGWR	1	P27695	APEX1_HUMAN	276	274	3U8U	Structure	276:D	8209	23.68	Intra	1	0.97	3	15364	4
NPKGNK	2	P27695	APEX1_HUMAN	224	221	3U8U	Structure	224:D	7800	KNAGFTPQER	0	P27695	APEX1_HUMAN	228	227	3U8U	Structure	228:D	7826	8.69	Intra	2	1	3	9163	4
SKNVGWR	1	P27695	APEX1_HUMAN	276	274	3U8U	Structure	276:A	1825	KNAGFTPQER	0	P27695	APEX1_HUMAN	228	227	3U8U	Structure	228:A	1430	21.93	Intra	1	1	3	13698	4
DKQDEEQR	1	P27797	CALR_HUMAN	360	358	3POW	Structure	360:A	1968	FVLSSGKFYGDEEKDK	6	P27797	CALR_HUMAN	55	48	3POW	Structure	55:A	321	11.75	Intra	4	1	8	16277	5
GKNVLINK	1	P27797	CALR_HUMAN	153	151	3POW	Structure	153:A	1102	FVLSSGKFYGDEEKDK	6	P27797	CALR_HUMAN	55	48	3POW	Structure	55:A	321	40.68	Intra	4	1	8	18760	4
GKNVLINK	1	P27797	CALR_HUMAN	153	151	3POW	Structure	153:A	1102	KVHVIFNYK	0	P27797	CALR_HUMAN	143	142	3POW	Structure	143:A	1017	20.4	Intra	2	1	8	17315	5
HKSDFGK	1	P27797	CALR_HUMAN	43	41	3POW	Structure	43:A	232	FVLSSGKFYGDEEKDK	6	P27797	CALR_HUMAN	55	48	3POW	Structure	55:A	321	30	Intra	1	1	8	15475	5
HKSDFGK	1	P27797	CALR_HUMAN	43	41	3POW	Structure	43:A	232	GKNVLINK	1	P27797	CALR_HUMAN	153	151	3POW	Structure	153:A	1102	24.87	Intra	1	1	8	11783	4
HKSDFGK	1	P27797	CALR_HUMAN	43	41	3POW	Structure	43:A	232	KVHVIFNYK	0	P27797	CALR_HUMAN	143	142	3POW	Structure	143:A	1017	27.42	Intra	6	1	8	13962	5
LKEEEEDKK	1	P27797	CALR_HUMAN	368	366	####		####	####	FVLSSGKFYGDEEKDK	6	P27797	CALR_HUMAN	55	48	P27797	Phyre	55:A	292	####	Intra	3	1	8	15290	5
WIESKHK	4	P27797	CALR_HUMAN	41	36	3POW	Structure	41:A	213	SDFGKFVLSSGK	4	P27797	CALR_HUMAN	48	43	3POW	Structure	48:A	270	11.76	Intra	6	1	8	18760	5
KIPNPDFFEDLEPFR	0	P27824	CALX_HUMAN	401	400	P27824	Phyre	401:A	2621	WKPPMIDNPSYQGIWKPR	15	P27824	CALX_HUMAN	398	382	P27824	Phyre	398:A	2594	8.47	Intra	2	1	1	33015	5
KTGTTIAGVVYK	0	Q99436	PSB7_HUMAN	41	40	5LE5	Structure	####	####	VFDKLSPLHER	3	P28065	PSB9_HUMAN	53	49	6AVO	Structure	33:A	232	####	1	1	0.95	1	19805	5
KAYGQALAK	0	P29401	TKT_HUMAN	319	318	4KXW	Structure	319:A	2792	ESWHGKPLPK	5	P29401	TKT_HUMAN	260	254	4KXW	Structure	260:A	2225	53.05	Intra	13	1	17	13842	5
KAYGQALAK	0	P29401	TKT_HUMAN	319	318	4KXW	Structure	319:A	2792	ESWHGKPLPKNMAEQIIQEIYSQIQSK	9	P29401	TKT_HUMAN	264	254	4KXW	Structure	264:A	2279	62.63	Intra	3	1	17	35870	5
KAYGQALAK	0	P29401	TKT_HUMAN	319	318	4KXW	Structure	319:A	2792	GITGVEDKESWHGKPLPK	13	P29401	TKT_HUMAN	260	246	4KXW	Structure	260:A	2225	53.05	Intra	4	1	17	14368	5
KAYGQALAK	0	P29401	TKT_HUMAN	319	318	4KXW	Structure	319:A	2792	MPSLPSYKVGDK	7	P29401	TKT_HUMAN	310	302	4KXW	Structure	310:A	2723	14.92	Intra	5	1	17	18565	4
KEHPDR	0	P29401	TKT_HUMAN	353	352	4KXW	Structure	353:A	3074	ESWHGKPLPK	5	P29401	TKT_HUMAN	260	254	4KXW	Structure	260:A	2225	53.45	Intra	1	1	17	9886	5
KEHPDR	0	P29401	TKT_HUMAN	353	352	4KXW	Structure	353:A	3074	KAYGQALAK	0	P29401	TKT_HUMAN	319	318	4KXW	Structure	319:A	2792	13.94	Intra	28	1	17	8220	5
KLILDSAR	0	P29401	TKT_HUMAN	543	542	4KXW	Structure	543:A	4691	AVELAANTKGICFIR	8	P29401	TKT_HUMAN	465	456	4KXW	Structure	465:A	4005	23.27	Intra	3	1	17	25677	4
KLILDSAR	0	P29401	TKT_HUMAN	543	542	4KXW	Structure	543:A	4691	SKDDQVTVIGAGVTLHEALAAAELLK	1	P29401	TKT_HUMAN	499	497	4KXW	Structure	499:A	4317	18.7	Intra	1	1	17	34976	4
LQALKDTANR	4	P29401	TKT_HUMAN	16	11	4KXW	Structure	16:A	145	HQPTAIIAKTFK	8	P29401	TKT_HUMAN	241	232	4KXW	Structure	241:A	2053	16.58	Intra	4	1	17	17351	5
SGKPAELLK	2	P29401	TKT_HUMAN	597	594	4KXW	Structure	597:A	5124	ESWHGKPLPK	5	P29401	TKT_HUMAN	260	254	4KXW	Structure	260:A	2225	56.94	Intra	8	1	17	16210	4
SGKPAELLK	2	P29401	TKT_HUMAN	597	594	4KXW	Structure	597:A	5124	KAYGQALAK	0	P29401	TKT_HUMAN	319	318	4KXW	Structure	319:A	2792	19.72	Intra	6	1	17	16441	4
VGDKIATR	3	P29401	TKT_HUMAN	314	310	4KXW	Structure	314:A	2751	ESWHGKPLPK	5	P29401	TKT_HUMAN	260	254	4KXW	Structure	260:A	2225	61.49	Intra	2	1	17	13645	5
VGDKIATR	3	P29401	TKT_HUMAN	314	310	4KXW	Structure	314:A	2751	KAYGQALAK	0	P29401	TKT_HUMAN	319	318	4KXW	Structure	319:A	2792	10.65	Intra	2	1	17	12350	4
VGDKIATR	3	P29401	TKT_HUMAN	314	310	4KXW	Structure	314:A	2751	SGKPAELLK	2	P29401	TKT_HUMAN	597	594	4KXW	Structure	597:A	5124	18.32	Intra	3	1	17	15535	4
VVLKSK	3	P29401	TKT_HUMAN	497	493	4KXW	Structure	497:A	4302	KLILDSAR	0	P29401	TKT_HUMAN	543	542	4KXW	Structure	543:A	4691	16.34	Intra	3	1	17	16456	4
YFDKASYR	3	P29401	TKT_HUMAN	144	140	4KXW	Structure	144:A	1178	AFGQAKHQPTAIIAK	5	P29401	TKT_HUMAN	232	226	4KXW	Structure	232:A	1958	16.92	Intra	1	1	17	15739	5
YKSQDPR	1	P29401	TKT_HUMAN	59	57	4KXW	Structure	59:A	488	AVELAANTKGICFIR	8	P29401	TKT_HUMAN	465	456	4KXW	Structure	465:A	4005	27.03	Intra	3	1	17	21765	4
IKFPLPHR	1	Q02543	RL18A_HUMAN	151	149	Q02543	Phyre	151:A	1219	AVELAANTKGICFIR	8	P29401	TKT_HUMAN	465	456	P29401	Phyre	465:A	3542	####	2	1	0.7	1	24449	4
FHKLQNVQIALDYLR	2	Q15149	PLEC_HUMAN	236	233	5J1I	Structure	####	####	RCEAFGWHAIIVDGHSVEELCKAFGQAK	21	P29401	TKT_HUMAN	226	204	4KXW	Structure	226:A	1900	####	1	1	0.84	1	24180	6
LNVLEKSSPGHR	5	P29692	EF1D_HUMAN	117	111	####		####	####	GVVQELQQAISKLEAR	11	P29692	EF1D_HUMAN	107	95	####		####	####	####	Intra	1	1	1	34194	4
LIEKNK	3	P30040	ERP29_HUMAN	230	226	2QC7	Structure	230:B	3318	WAEQYLKIMGK	6	P30040	ERP29_HUMAN	204	197	2QC7	Structure	204:B	3113	25.18	Intra	1	0.95	1	20899	4
AAKLAPEFAK	2	P30041	PRDX6_HUMAN	56	53	5B6M	Structure	56:C	3900	VVISLQLTAEKR	10	P30041	PRDX6_HUMAN	173	162	5B6M	Structure	173:C	4827	28.7	Intra	5	1	3	24638	4
KLFPK	0	P30041	PRDX6_HUMAN	200	199	5B6M	Structure	200:B	3289	LKLSILYPATTGR	1	P30041	PRDX6_HUMAN	144	142	5B6M	Structure	144:B	2850	28.15	Intra	3	1	3	25448	4
LAPEFAKR	6	P30041	PRDX6_HUMAN	63	56	5B6M	Structure	63:C	3954	VVISLQLTAEKR	10	P30041	PRDX6_HUMAN	173	162	5B6M	Structure	173:C	4827	18.93	Intra	3	1	3	22514	4
AHKAEGK	2	P30044	PRDX5_HUMAN	142	139	3MNG	Structure	####	####	AHKAEGK	2	P30044	PRDX5_HUMAN	142	139	3MNG	Structure	####	####	####	N/A	2	1	1	3835	5
KNGGLGHMNIALLSDLTK	0	P30048	PRDX3_HUMAN	149	148	5UCX	Structure	88:C	3731	KNGGLGHMNIALLSDLTK	0	P30048	PRDX3_HUMAN	149	148	5UCX	Structure	88:B	2216	17.99	1	3	1	1	30631	6
ALKEPPR	2	P30050	RL12_HUMAN	86	83	5A8L	Structure	86:G	7587	ATGDWKGLR	5	P30050	RL12_HUMAN	54	48	5A8L	Structure	54:G	7344	12.24	Intra	2	1	3	15739	4
ATGDWKGLR	5	P30050	RL12_HUMAN	54	48	5A8L	Structure	54:G	7344	ITVKLTIQNR	3	P30050	RL12_HUMAN	61	57	5A8L	Structure	61:G	7398	16.8	Intra	2	1	3	20550	4
KVGDDIAK	0	P30050	RL12_HUMAN	41	40	5A8L	Structure	41:G	7248	ATGDWKGLR	5	P30050	RL12_HUMAN	54	48	5A8L	Structure	54:G	7344	15.53	Intra	2	1	3	15585	4
NAWKHSR	3	Q9UKD2	MRT4_HUMAN	61	57	Q9UKD2	Phyre	61:A	440	ITVKLTIQNR	3	P30050	RL12_HUMAN	61	57	5A8L	Structure	61:G	7398	####	1	2	0.91	1	15782	5
DGKALER	2	P30101	PDIA3_HUMAN	347	344	3F8U	Structure	347:C	8995	FLDAGHKLNFAVASR	6	P30101	PDIA3_HUMAN	296	289	3F8U	Structure	296:C	8599	18.98	Intra	1	1	9	19778	4
DGKALER	2	P30101	PDIA3_HUMAN	347	344	3F8U	Structure	347:C	8995	NAKGSNYWR	2	P30101	PDIA3_HUMAN	274	271	3F8U	Structure	274:C	8417	21.98	Intra	3	1	9	13326	4
KFLDAGHK	0	P30101	PDIA3_HUMAN	289	288	3F8U	Structure	289:C	8544	NAKGSNYWR	2	P30101	PDIA3_HUMAN	274	271	3F8U	Structure	274:C	8417	23.55	Intra	2	1	9	13827	5
KQAGPASVPLR	0	P30101	PDIA3_HUMAN	130	129	3F8U	Structure	130:C	7254	YGVSGYPTLKIFR	9	P30101	PDIA3_HUMAN	104	94	3F8U	Structure	104:C	7057	15.65	Intra	2	1	9	24726	4
KYEGGR	0	P30101	PDIA3_HUMAN	466	465	3F8U	Structure	466:C	9955	YGVSGYPTLKIFR	9	P30101	PDIA3_HUMAN	104	94	3F8U	Structure	104:C	7057	44.02	Intra	6	1	9	22714	4
MTSGKIK	4	P30101	PDIA3_HUMAN	231	226	3F8U	Structure	231:C	8061	FLDAGHKLNFAVASR	6	P30101	PDIA3_HUMAN	296	289	3F8U	Structure	296:C	8599	24.03	Intra	5	1	9	19095	5
M[147.04]TSGKIK	4	P30101	PDIA3_HUMAN	231	226	3F8U	Structure	231:C	8061	FLDAGHKLNFAVASR	6	P30101	PDIA3_HUMAN	296	289	3F8U	Structure	296:C	8599	24.03	Intra	1	1	9	18651	5
TAKGEK	2	P30101	PDIA3_HUMAN	332	329	3F8U	Structure	332:C	8871	FLDAGHKLNFAVASR	6	P30101	PDIA3_HUMAN	296	289	3F8U	Structure	296:C	8599	14.36	Intra	17	1	9	17971	4
TEEEFKK	5	P30101	PDIA3_HUMAN	146	140	3F8U	Structure	146:C	7377	NAKGSNYWR	2	P30101	PDIA3_HUMAN	274	271	3F8U	Structure	274:C	8417	22.65	Intra	2	1	9	13038	4
ALSTGEKGFGYK	6	P62937	PPIA_HUMAN	44	37	P30405_P62937	Docking	44:B	399	ALCTGEKGFGYK	6	P30405	PPIF_HUMAN	86	79	P30405_P62937	Docking	86:A	638	26.99	1	4	1	1	15821	4
LSPQAVNSIAKR	10	P30626	SORCN_HUMAN	146	135	1JUO	Structure	146:A	904	SGTVDPQELQKALTTMGFR	10	P30626	SORCN_HUMAN	127	116	1JUO	Structure	127:A	771	15.31	Intra	1	0.86	1	30816	4
DIFISKIVHK	5	P30740	ILEU_HUMAN	317	311	4GA7	Structure	317:B	5477	LGVQDLFNSSKADLSGMSGAR	10	P30740	ILEU_HUMAN	301	290	4GA7	Structure	301:B	5362	16.26	Intra	1	1	3	30332	5
GASYILKLANR	6	P30740	ILEU_HUMAN	87	80	4GA7	Structure	87:B	3618	FQSLNADINKR	9	P30740	ILEU_HUMAN	79	69	4GA7	Structure	79:B	3555	11.15	Intra	1	1	3	22014	4
GASYILKLANR	6	P30740	ILEU_HUMAN	87	80	4GA7	Structure	87:A	665	TINQWVKGQTEGK	6	P30740	ILEU_HUMAN	137	130	4GA7	Structure	137:A	1073	10.53	Intra	2	1	3	22080	4
TFIGKIPIMLR	4	P30876	RPB2_HUMAN	151	146	5IYB	Structure	151:B	12675	FEQIYLSKPTHWER	7	P30876	RPB2_HUMAN	95	87	5IYB	Structure	95:B	12222	10.89	Intra	1	1	1	29079	5
TEDGKIYQR	4	P31040	SDHA_HUMAN	167	162	P31040	Modeller	167:A	1260	AFGGQSLKFGK	7	P31040	SDHA_HUMAN	179	171	P31040	Modeller	179:A	1356	13.79	Intra	1	0.95	1	16957	4
KPIYQR	0	P31153	METK2_HUMAN	368	367	5A1I	Structure	368:A	3044	AAVDYQKVVR	6	P31153	METK2_HUMAN	81	74	5A1I	Structure	81:A	519	20.53	Intra	2	1	2	14568	4
KPIYQR	0	P31153	METK2_HUMAN	368	367	5A1I	Structure	368:A	3044	LNAKLAELR	3	P31153	METK2_HUMAN	163	159	5A1I	Structure	163:A	1255	27.9	Intra	2	1	2	17292	4
EVEMDAVGKDGR	8	P31327	CPSM_HUMAN	1183	1174	5DOT	Structure	1183:A	8067	IAKAFAISGPFNVQFLVK	2	P31327	CPSM_HUMAN	1232	1229	5DOT	Structure	1232:A	8437	9.34	Intra	1	1	6	32310	4
IAKAFAISGPFNVQFLVK	2	P31327	CPSM_HUMAN	1232	1229	5DOT	Structure	1232:A	8437	VMIGENVDEKHLPTLDHPIIPADYVAIK	9	P31327	CPSM_HUMAN	1291	1281	5DOT	Structure	1291:A	8898	20.43	Intra	6	1	6	34994	5
IAKAFAISGPFNVQFLVK	2	P31327	CPSM_HUMAN	1232	1229	5DOT	Structure	1232:A	8437	VM[147.04]IGENVDEKHLPTLDHPIIPADYVAIK	9	P31327	CPSM_HUMAN	1291	1281	5DOT	Structure	1291:A	8898	20.43	Intra	4	1	6	34323	5
IGSSMKSVGEVMAIGR	5	P31327	CPSM_HUMAN	793	787	5DOT	Structure	793:B	15618	LPMNKEWPSNLDLR	4	P31327	CPSM_HUMAN	831	826	5DOT	Structure	831:B	15916	20.92	Intra	1	1	6	28485	4
KELSEPSSTR	0	P31327	CPSM_HUMAN	841	840	5DOT	Structure	841:A	5483	IGSSMKSVGEVMAIGR	5	P31327	CPSM_HUMAN	793	787	5DOT	Structure	793:A	5097	20.14	Intra	2	1	6	21204	4
KVDSKSLFHYR	4	P31327	CPSM_HUMAN	1486	1481	5DOT	Structure	1486:A	10406	SFPFVSKTLGVDFIDVATK	6	P31327	CPSM_HUMAN	1269	1262	5DOT	Structure	1269:A	8732	22.71	Intra	1	1	6	29491	5
KQQMGK	0	P31946	1433B_HUMAN	77	76	5N10	Structure	77:A	1333	VISSIEQKTER	7	P31946	1433B_HUMAN	70	62	5N10	Structure	70:A	1207	10.92	Intra	2	1	4	11919	4
KQQM[147.04]GK	0	P31946	1433B_HUMAN	77	76	5N10	Structure	77:A	1333	VISSIEQKTER	7	P31946	1433B_HUMAN	70	62	5N10	Structure	70:A	1207	10.92	Intra	6	1	4	10914	4
VFYLKMK	4	P31946	1433B_HUMAN	122	117	5N10	Structure	122:A	2123	VISSIEQKTER	7	P31946	1433B_HUMAN	70	62	5N10	Structure	70:A	1207	34.92	Intra	1	1	4	21402	4
VISSIEQKTER	7	P31946	1433B_HUMAN	70	62	5N10	Structure	70:A	1207	NLLSVAYKNVVGAR	7	P31946	1433B_HUMAN	51	43	5N10	Structure	51:A	896	28.57	Intra	2	1	4	25608	4
ASLIQKAK	5	P31947	1433S_HUMAN	9	3	3LW1	Structure	9:A	101	GAVEKGEELSCEER	4	P31947	1433S_HUMAN	32	27	3LW1	Structure	32:A	298	15.2	Intra	3	1	4	15810	4
NLLSVAYKNVVGGQR	7	P31947	1433S_HUMAN	49	41	3LW1	Structure	49:A	449	VLSSIEQKSNEEGSEEKGPEVR	7	P31947	1433S_HUMAN	68	60	3LW1	Structure	68:A	617	28.3	Intra	1	1	4	22166	5
VFYLKMK	4	P31947	1433S_HUMAN	122	117	3LW1	Structure	122:A	1071	NLLSVAYKNVVGGQR	7	P31947	1433S_HUMAN	49	41	3LW1	Structure	49:A	449	12.59	Intra	3	1	4	27729	4
VFYLKM[147.04]K	4	P31947	1433S_HUMAN	122	117	3LW1	Structure	122:A	1071	NLLSVAYKNVVGGQR	7	P31947	1433S_HUMAN	49	41	3LW1	Structure	49:A	449	12.59	Intra	7	1	4	25750	4
SAAYAKK	5	P31948	STIP1_HUMAN	50	44	P31948	Phyre	50:A	375	TVDLKPDWGKGYSR	9	P31948	STIP1_HUMAN	73	63	P31948	Phyre	73:A	560	16.18	Intra	9	1	1	15207	5
AVPSQKR	5	P31949	S10AB_HUMAN	103	97	2LUC	Structure	103:A	1584	NQKDPGVLDR	2	P31949	S10AB_HUMAN	55	52	2LUC	Structure	55:A	855	33.04	Intra	1	0.97	1	11340	4
TLQLLKVGEEDDGEYR	5	P32004	L1CAM_HUMAN	301	295	P32004	Phyre	301:A	1902	HAYYVTVEAAPYWLHKPQSHLYGPGETAR	15	P32004	L1CAM_HUMAN	338	322	P32004	Phyre	338:A	2191	32.49	Intra	2	1	1	23868	5
ATAVVDGAFKEVK	9	P32119	PRDX2_HUMAN	26	16	5IJT	Structure	26:I	21195	KLGCEVLGVSVDSQFTHLAWINTPR	0	P32119	PRDX2_HUMAN	67	66	5IJT	Structure	67:I	21883	22.24	Intra	2	1	6	29336	5
IGKPAPDFK	2	P32119	PRDX2_HUMAN	10	7	5IJT	Structure	10:B	2632	EVKLSDYK	2	P32119	PRDX2_HUMAN	29	26	5IJT	Structure	29:B	2914	17.4	Intra	4	1	6	17565	4
IGKPAPDFK	2	P32119	PRDX2_HUMAN	10	7	5IJT	Structure	10:I	20966	GLFIIDGKGVLR	7	P32119	PRDX2_HUMAN	135	127	5IJT	Structure	135:I	22934	9.72	Intra	4	1	6	25978	4
KEGGLGPLNIPLLADVTR	0	P32119	PRDX2_HUMAN	92	91	5IJT	Structure	92:I	22272	KLGCEVLGVSVDSQFTHLAWINTPR	0	P32119	PRDX2_HUMAN	67	66	5IJT	Structure	67:I	21883	29.76	Intra	3	1	6	38353	5
LSDYKGK	4	P32119	PRDX2_HUMAN	34	29	5IJT	Structure	34:F	13394	GLFIIDGKGVLR	7	P32119	PRDX2_HUMAN	135	127	5IJT	Structure	135:F	14995	5.87	Intra	3	1	6	24166	4
LSDYKGK	4	P32119	PRDX2_HUMAN	34	29	5IJT	Structure	34:F	13394	IGKPAPDFK	2	P32119	PRDX2_HUMAN	10	7	5IJT	Structure	10:F	13027	14.3	Intra	7	1	6	14389	4
AVSEGYKDFR	6	P32320	CDD_HUMAN	80	73	1MQ0	Structure	80:B	1447	KSAYCPYSHFPVGAALLTQEGR	0	P32320	CDD_HUMAN	27	26	1MQ0	Structure	27:B	1059	24.72	Intra	2	1	1	22801	5
KELATVR	0	P32969	RL9_HUMAN	65	64	2CQL	Structure	65:A	1157	LRVDKWWGNR	4	P32969	RL9_HUMAN	59	54	2CQL	Structure	59:A	1042	8.72	Intra	9	1	10	18099	4
KELATVR	0	P32969	RL9_HUMAN	65	64	2CQL	Structure	65:A	1157	TICSHVQNMIKGVTLGFR	10	P32969	RL9_HUMAN	82	71	2CQL	Structure	82:A	1432	25.72	Intra	12	1	10	23861	4
KELATVR	0	P32969	RL9_HUMAN	65	64	2CQL	Structure	65:A	1157	TICSHVQNM[147.04]IKGVTLGFR	10	P32969	RL9_HUMAN	82	71	2CQL	Structure	82:A	1432	25.72	Intra	6	1	10	19906	4
KELATVR	0	P32969	RL9_HUMAN	65	64	2CQL	Structure	65:A	1157	VDKWWGNR	2	P32969	RL9_HUMAN	59	56	2CQL	Structure	59:A	1042	8.72	Intra	22	1	10	17802	4
KFLDGIYVSEK	0	P32969	RL9_HUMAN	174	173	P32969	Phyre	174:A	1318	TICSHVQNMIKGVTLGFR	10	P32969	RL9_HUMAN	82	71	P32969	Phyre	82:A	589	38.82	Intra	2	1	10	28080	5
TVIVKGPR	4	P32969	RL9_HUMAN	28	23	2CQL	Structure	28:A	502	VDKWWGNR	2	P32969	RL9_HUMAN	59	56	2CQL	Structure	59:A	1042	24.58	Intra	2	1	10	18383	4
VDKWWGNR	2	P32969	RL9_HUMAN	59	56	2CQL	Structure	59:A	1042	DFNHINVELSLLGKK	13	P32969	RL9_HUMAN	50	36	2CQL	Structure	50:A	859	21.53	Intra	1	1	10	26935	4
VDKWWGNR	2	P32969	RL9_HUMAN	59	56	P32969	Phyre	59:A	396	NFLGEKYIR	5	P32969	RL9_HUMAN	121	115	P32969	Phyre	121:A	905	55.12	Intra	3	1	10	22439	4
VDKWWGNR	2	P32969	RL9_HUMAN	59	56	2CQL	Structure	59:A	1042	TICSHVQNMIKGVTLGFR	10	P32969	RL9_HUMAN	82	71	2CQL	Structure	82:A	1432	24.08	Intra	4	1	10	25898	5
VDKWWGNR	2	P32969	RL9_HUMAN	59	56	2CQL	Structure	59:A	1042	TICSHVQNM[147.04]IKGVTLGFR	10	P32969	RL9_HUMAN	82	71	2CQL	Structure	82:A	1432	24.08	Intra	2	1	10	22323	5
AVVKTDIQIALPSGCYGR	3	P33316	DUT_HUMAN	155	151	3ARA	Structure	67:B	1312	SGLAAKHFIDVGAGVIDEDYR	5	P33316	DUT_HUMAN	179	173	3ARA	Structure	91:B	1482	22.27	Intra	1	0.82	1	27552	5
AVDPKTGR	4	P34897	GLYM_HUMAN	302	297	P34897	Modeller	302:A	1778	LQDFKSFLLK	4	P34897	GLYM_HUMAN	469	464	P34897	Modeller	469:A	3021	50.27	Intra	6	1	6	23518	4
LNPKTGLIDYNQLALTAR	3	P34897	GLYM_HUMAN	200	196	3OU5	Structure	####	####	LNPKTGLIDYNQLALTAR	3	P34897	GLYM_HUMAN	200	196	3OU5	Structure	####	####	####	1	3	1	6	31321	4
LQDFKSFLLK	4	P34897	GLYM_HUMAN	469	464	3OU5	Structure	453:A	2899	EVCDEVKAHLLADMAHISGLVAAK	6	P34897	GLYM_HUMAN	245	238	3OU5	Structure	229:A	1234	50.02	Intra	3	1	6	37130	5
LQDFKSFLLK	4	P34897	GLYM_HUMAN	469	464	P34897	Modeller	469:A	3021	IMGLDLPDGGHLTHGYMSDVKR	20	P34897	GLYM_HUMAN	181	160	P34897	Modeller	181:A	860	35.94	Intra	4	1	6	26698	5
TAKLQDFK	2	P34897	GLYM_HUMAN	464	461	P34897	Modeller	464:A	2982	YSEGYPGKR	7	P34897	GLYM_HUMAN	103	95	P34897	Modeller	103:A	492	51.05	Intra	1	1	6	15139	4
YSEGYPGKR	7	P34897	GLYM_HUMAN	103	95	P34897	Modeller	103:A	492	LQDFKSFLLK	4	P34897	GLYM_HUMAN	469	464	P34897	Modeller	469:A	3021	44.69	Intra	4	1	6	24938	4
GLDTPGKR	6	Q9C0H9	SRCN1_HUMAN	771	764	####		####	####	YSEGYPGKR	7	P34897	GLYM_HUMAN	103	95	3OU5	Structure	####	####	####	2	3	0.91	1	10618	4
GCALQCAILSPAFKVR	13	P34932	HSP74_HUMAN	388	374	P34932	Phyre	388:A	2966	KPVVDCVVSVPCFYTDAER	0	P34932	HSP74_HUMAN	135	134	P34932	Phyre	135:A	1012	17.97	Intra	1	1	7	31040	4
LKVLATAFDTTLGGR	1	P34932	HSP74_HUMAN	221	219	P34932	Phyre	221:A	1674	NHAAPFSKVLTFYR	7	P34932	HSP74_HUMAN	430	422	P34932	Phyre	430:A	3292	19.65	Intra	7	1	7	29975	4
QDLPALEEKPR	8	P34932	HSP74_HUMAN	194	185	P34932	Phyre	194:A	1463	NHAAPFSKVLTFYR	7	P34932	HSP74_HUMAN	430	422	P34932	Phyre	430:A	3292	29.13	Intra	1	1	7	24342	5
SKEIEAK	1	P34932	HSP74_HUMAN	766	764	####		####	####	NLGQPIKIR	6	P34932	HSP74_HUMAN	686	679	P34932	Phyre	686:A	4785	####	Intra	7	1	7	15446	4
SVLEQTKLK	6	P34932	HSP74_HUMAN	329	322	P34932	Phyre	329:A	2522	NHAAPFSKVLTFYR	7	P34932	HSP74_HUMAN	430	422	P34932	Phyre	430:A	3292	25.4	Intra	11	1	7	23275	5
SVLEQTKLKK	6	P34932	HSP74_HUMAN	329	322	P34932	Phyre	329:A	2522	NHAAPFSKVLTFYR	7	P34932	HSP74_HUMAN	430	422	P34932	Phyre	430:A	3292	25.4	Intra	4	1	7	20793	5
VTPQSDGSSSKVK	10	P34932	HSP74_HUMAN	477	466	P34932	Phyre	477:A	3666	NHAAPFSKVLTFYR	7	P34932	HSP74_HUMAN	430	422	P34932	Phyre	430:A	3292	16.33	Intra	3	1	7	20692	5
KGPLENGDGDK	0	P35227	PCGF2_HUMAN	148	147	P35227	Phyre	148:A	####	KGPLENGDGDK	0	P35227	PCGF2_HUMAN	148	147	P35227	Phyre	148:A	####	####	1	1	0.79	1	7036	4
AQFLVEKAK	6	Q99623	PHB2_HUMAN	216	209	P35232_Q99623	Docking	216:B	####	FVVEKAEQQK	4	P35232	PHB_HUMAN	202	197	P35232_Q99623	Docking	202:A	1104	####	1	2	0.98	4	18763	4
FVVEKAEQQK	4	P35232	PHB_HUMAN	202	197	P35232_Q99623	Docking	202:A	1104	AAQNISKTIATSQNR	6	Q99623	PHB2_HUMAN	262	255	P35232_Q99623	Docking	262:B	####	####	1	3	1	4	15940	4
SVVAKFNASQLITQR	4	Q99623	PHB2_HUMAN	147	142	P35232_Q99623	Docking	147:B	556	VLPSITTEILKSVVAR	10	P35232	PHB_HUMAN	128	117	P35232_Q99623	Docking	128:A	522	21.6	1	2	1	4	36489	4
VLPSIVNEVLKSVVAK	10	Q99623	PHB2_HUMAN	142	131	P35232_Q99623	Docking	142:B	522	VLPSITTEILKSVVAR	10	P35232	PHB_HUMAN	128	117	P35232_Q99623	Docking	128:A	522	21.46	1	1	0.95	4	46310	4
KYTWNDVGQLVEK	0	P35573	GDE_HUMAN	191	190	####		####	####	KYTEITATYFQGVR	0	P35573	GDE_HUMAN	511	510	P35573	Phyre	511:A	3937	####	Intra	1	0.95	1	26662	4
EEELVKVR	5	P35579	MYH9_HUMAN	856	850	P35579	Phyre	856:A	6828	EKQLAAENR	1	P35579	MYH9_HUMAN	860	858	P35579	Phyre	860:A	6864	6.4	Intra	2	1	8	14962	4
EQLAKLMATLR	4	P35579	MYH9_HUMAN	656	651	P35579	Phyre	656:A	5190	FVSELWKDVDR	6	P35579	MYH9_HUMAN	613	606	P35579	Phyre	613:A	4859	25.98	Intra	3	1	8	31162	4
NCAAYLKLR	6	P35579	MYH9_HUMAN	821	814	P35579	Phyre	821:A	6515	LFTKVKPLLQVSR	3	P35579	MYH9_HUMAN	833	829	P35579	Phyre	833:A	6639	16.71	Intra	3	1	8	22452	4
TDLLLEPYNKYR	9	P35579	MYH9_HUMAN	299	289	P35579	Phyre	299:A	2364	NTDQASMPDNTAAQKVSHLLGINVTDFTR	14	P35579	MYH9_HUMAN	373	358	P35579	Phyre	373:A	2947	13.64	Intra	1	1	8	35389	5
TDLLLEPYNKYR	9	P35579	MYH9_HUMAN	299	289	P35579	Phyre	299:A	2364	VISGVLQLGNIVFKK	13	P35579	MYH9_HUMAN	355	341	P35579	Phyre	355:A	2809	18.54	Intra	4	1	8	33633	4
VISGVLQLGNIVFKK	13	P35579	MYH9_HUMAN	355	341	P35579	Phyre	355:A	2809	NTDQASMPDNTAAQKVSHLLGINVTDFTR	14	P35579	MYH9_HUMAN	373	358	P35579	Phyre	373:A	2947	18.82	Intra	7	1	8	39395	5
VISGVLQLGNIVFKK	13	P35579	MYH9_HUMAN	355	341	P35579	Phyre	355:A	2809	NTDQASM[147.04]PDNTAAQKVSHLLGINVTDFTR	14	P35579	MYH9_HUMAN	373	358	P35579	Phyre	373:A	2947	18.82	Intra	1	1	8	38711	5
VKANLEK	1	P35579	MYH9_HUMAN	1212	1210	####		####	####	AKQTLENER	1	P35579	MYH9_HUMAN	1219	1217	####		####	####	####	Intra	1	1	8	10371	4
IKIIAPPER	1	P68032	ACTC_HUMAN	330	328	P35579_P68032	Docking	330:B	2546	VISGVLQLGNIVFKK	13	P35579	MYH9_HUMAN	355	341	P35579_P68032	Docking	355:A	2809	19.94	1	4	1	1	31503	4
VVSSVLQFGNISFKK	13	P35580	MYH10_HUMAN	362	348	4PD3	Structure	362:A	2652	NTDQASMPENTVAQKLCHLLGMNVMEFTR	14	P35580	MYH10_HUMAN	380	365	4PD3	Structure	380:A	2785	18.84	Intra	1	1	1	41887	5
NKSFGSAQEFAWAHDSSEYAIR	1	P35606	COPB2_HUMAN	386	384	P35606	Phyre	386:A	3063	LPLAVKDMGSCEIYPQTIQHNPNGR	5	P35606	COPB2_HUMAN	346	340	P35606	Phyre	346:A	2750	30.48	Intra	2	1	1	24014	5
QIGIIKTNK	5	P35637	FUS_HUMAN	312	306	####		####	####	KTGQPMINLYTDR	0	P35637	FUS_HUMAN	316	315	####		####	####	####	Intra	4	1	1	21816	4
LKQIGALQ	1	P35754	GLRX1_HUMAN	100	98	4RQR	Structure	99:A	804	RAQEILSQLPIKQGLLEFVDITATNHTNEIQDYLQQLTGAR	11	P35754	GLRX1_HUMAN	39	27	4RQR	Structure	38:A	330	11.23	Intra	1	1	1	45331	5
SVQSQGFKLNVWDIGGQR	7	P36405	ARL3_HUMAN	62	54	P36405	Phyre	62:A	459	TTLLKQLASEDISHITPTQGFNIK	4	P36405	ARL3_HUMAN	35	30	P36405	Phyre	35:A	251	13.42	Intra	3	1	1	32983	5
GTKFGLFTPGSR	2	P36551	HEM6_HUMAN	404	401	2AEX	Structure	404:A	2381	AGVSISVVHGNLSEEAAKQMR	17	P36551	HEM6_HUMAN	220	202	2AEX	Structure	220:A	785	12.88	Intra	3	1	1	23009	5
ILKSPEIQR	2	P36578	RL4_HUMAN	294	291	P36578	Phyre	294:A	2319	MFAPTKTWR	5	P36578	RL4_HUMAN	106	100	P36578	Phyre	106:A	792	59.82	Intra	2	1	14	19591	4
ILKSPEIQR	2	P36578	RL4_HUMAN	294	291	P36578	Phyre	294:A	2319	NVTLPAVFKAPIRPDIVNFVHTNLR	8	P36578	RL4_HUMAN	29	20	P36578	Phyre	29:A	207	23.07	Intra	7	1	14	29612	5
ILKSPEIQR	2	P36578	RL4_HUMAN	294	291	P36578	Phyre	294:A	2319	SNYNLPMHKMINTDLSR	8	P36578	RL4_HUMAN	283	274	P36578	Phyre	283:A	2230	20.25	Intra	1	1	14	20099	5
KAASLK	0	P36578	RL4_HUMAN	269	268	P36578	Phyre	269:A	2121	NVTLPAVFKAPIRPDIVNFVHTNLR	8	P36578	RL4_HUMAN	29	20	P36578	Phyre	29:A	207	14.56	Intra	2	1	14	28431	5
LNILKLAPGGHVGR	4	P36578	RL4_HUMAN	239	234	P36578	Phyre	239:A	1874	GPCIIYNEDNGIIKAFR	13	P36578	RL4_HUMAN	219	205	P36578	Phyre	219:A	1718	17.61	Intra	3	1	14	27218	5
LNILKLAPGGHVGR	4	P36578	RL4_HUMAN	239	234	P36578	Phyre	239:A	1874	RGPCIIYNEDNGIIKAFR	14	P36578	RL4_HUMAN	219	204	P36578	Phyre	219:A	1718	17.61	Intra	1	1	14	25462	6
MFAPTKTWR	5	P36578	RL4_HUMAN	106	100	P36578	Phyre	106:A	792	KLDELYGTWR	0	P36578	RL4_HUMAN	259	258	P36578	Phyre	259:A	2031	45.93	Intra	1	1	14	23763	4
MFAPTKTWR	5	P36578	RL4_HUMAN	106	100	P36578	Phyre	106:A	792	LNILKLAPGGHVGR	4	P36578	RL4_HUMAN	239	234	P36578	Phyre	239:A	1874	31.34	Intra	4	1	14	23831	5
M[147.04]FAPTKTWR	5	P36578	RL4_HUMAN	106	100	P36578	Phyre	106:A	792	LNILKLAPGGHVGR	4	P36578	RL4_HUMAN	239	234	P36578	Phyre	239:A	1874	31.34	Intra	1	1	14	22541	5
VNTTQKR	5	P36578	RL4_HUMAN	120	114	P36578	Phyre	120:A	928	AASLKSNYNLPMHK	4	P36578	RL4_HUMAN	274	269	P36578	Phyre	274:A	2154	11.17	Intra	2	1	14	13121	5
VNTTQKR	5	P36578	RL4_HUMAN	120	114	P36578	Phyre	120:A	928	KLDELYGTWR	0	P36578	RL4_HUMAN	259	258	P36578	Phyre	259:A	2031	20.34	Intra	2	1	14	17607	4
VNTTQKR	5	P36578	RL4_HUMAN	120	114	P36578	Phyre	120:A	928	LNILKLAPGGHVGR	4	P36578	RL4_HUMAN	239	234	P36578	Phyre	239:A	1874	13.34	Intra	4	1	14	18633	5
VNTTQKR	5	P36578	RL4_HUMAN	120	114	P36578	Phyre	120:A	928	MFAPTKTWR	5	P36578	RL4_HUMAN	106	100	P36578	Phyre	106:A	792	29.15	Intra	6	1	14	16024	4
VNTTQKR	5	P36578	RL4_HUMAN	120	114	P36578	Phyre	120:A	928	M[147.04]FAPTKTWR	5	P36578	RL4_HUMAN	106	100	P36578	Phyre	106:A	792	29.15	Intra	12	1	14	14138	4
KTVGVEPAADGK	0	P46779	RL28_HUMAN	47	46	5T2C	Structure	####	####	NVTLPAVFKAPIRPDIVNFVHTNLR	8	P36578	RL4_HUMAN	29	20	5T2C	Structure	####	####	####	1	1	0.94	1	29469	5
AASLKSNYNLPMHK	4	P36578	RL4_HUMAN	274	269	5T2C	Structure	####	####	AGGKILTFDQLALDSPK	3	Q07020	RL18_HUMAN	119	115	5T2C	Structure	####	####	####	1	3	1	8	24164	5
AGGKILTFDQLALDSPK	3	Q07020	RL18_HUMAN	119	115	5T2C	Structure	####	####	NVTLPAVFKAPIRPDIVNFVHTNLR	8	P36578	RL4_HUMAN	29	20	5T2C	Structure	####	####	####	1	8	1	8	34147	6
ILKSPEIQR	2	P36578	RL4_HUMAN	294	291	5T2C	Structure	####	####	AGGKILTFDQLALDSPK	3	Q07020	RL18_HUMAN	119	115	5T2C	Structure	####	####	####	1	4	1	8	26503	4
KAASLK	0	P36578	RL4_HUMAN	269	268	5T2C	Structure	####	####	AGGKILTFDQLALDSPK	3	Q07020	RL18_HUMAN	119	115	5T2C	Structure	####	####	####	1	8	1	8	24928	4
KAASLK	0	P36578	RL4_HUMAN	269	268	5T2C	Structure	####	####	VQEVPKLK	5	Q07020	RL18_HUMAN	97	91	5T2C	Structure	####	####	####	1	1	1	8	13361	4
LLVKLYR	3	Q07020	RL18_HUMAN	30	26	5T2C	Structure	####	####	ILKSPEIQR	2	P36578	RL4_HUMAN	294	291	5T2C	Structure	####	####	####	1	6	1	8	20924	4
VQEVPKLK	5	Q07020	RL18_HUMAN	97	91	5T2C	Structure	####	####	AASLKSNYNLPMHK	4	P36578	RL4_HUMAN	274	269	5T2C	Structure	####	####	####	1	1	1	8	16858	5
VQEVPKLK	5	Q07020	RL18_HUMAN	97	91	5T2C	Structure	####	####	NVTLPAVFKAPIRPDIVNFVHTNLR	8	P36578	RL4_HUMAN	29	20	5T2C	Structure	####	####	####	1	1	1	8	29437	6
DHWQKYGR	4	P36871	PGM1_HUMAN	419	414	5JN5	Structure	419:A	3241	LYIDSYEKDVAK	7	P36871	PGM1_HUMAN	523	515	5JN5	Structure	523:A	4045	8.78	Intra	1	1	6	17119	4
FYMKEAIQLIAR	3	P36871	PGM1_HUMAN	68	64	5JN5	Structure	68:B	4836	IDAMHGVVGPYVKK	12	P36871	PGM1_HUMAN	234	221	5JN5	Structure	234:B	6083	22.19	Intra	3	1	6	27612	4
FYMKEAIQLIAR	3	P36871	PGM1_HUMAN	68	64	5JN5	Structure	68:B	4836	IDAM[147.04]HGVVGPYVKK	12	P36871	PGM1_HUMAN	234	221	5JN5	Structure	234:B	6083	22.19	Intra	1	1	6	26088	4
IDAMHGVVGPYVKK	12	P36871	PGM1_HUMAN	234	221	5JN5	Structure	234:B	6083	SIFDFSALKELLSGPNR	8	P36871	PGM1_HUMAN	209	200	5JN5	Structure	209:B	5890	13.62	Intra	2	1	6	37589	4
LYIDSYEKDVAK	7	P36871	PGM1_HUMAN	523	515	5JN5	Structure	523:A	4045	VASATKIALYETPTGWK	5	P36871	PGM1_HUMAN	349	343	5JN5	Structure	349:A	2671	19.95	Intra	2	1	6	25459	4
VASATKIALYETPTGWK	5	P36871	PGM1_HUMAN	349	343	5JN5	Structure	349:B	6944	FFGNLMDASKLSLCGEESFGTGSDHIR	9	P36871	PGM1_HUMAN	370	360	5JN5	Structure	370:B	7116	12.79	Intra	7	1	6	29716	5
EAGISKDR	5	P37837	TALDO_HUMAN	136	130	1F05	Structure	136:B	3495	FSYKTIVMGASFR	3	P37837	TALDO_HUMAN	230	226	1F05	Structure	230:B	4245	18.97	Intra	1	1	5	24566	4
FAADAVKLER	6	P37837	TALDO_HUMAN	321	314	1F05	Structure	321:B	4942	SVTKIYNYYK	3	P37837	TALDO_HUMAN	219	215	1F05	Structure	219:B	4137	35.83	Intra	1	1	5	20714	4
FSYKTIVMGASFR	3	P37837	TALDO_HUMAN	230	226	1F05	Structure	230:A	1721	AAQASDLEKIHLDEK	8	P37837	TALDO_HUMAN	286	277	1F05	Structure	286:A	2130	14.86	Intra	5	1	5	24447	5
KFAADAVK	0	P37837	TALDO_HUMAN	314	313	1F05	Structure	314:A	2368	ILIKLSSTWEGIQAGK	3	P37837	TALDO_HUMAN	142	138	1F05	Structure	142:A	1023	15.24	Intra	1	1	5	26081	4
SVTKIYNYYK	3	P37837	TALDO_HUMAN	219	215	1F05	Structure	219:A	1613	ILDWHVANTDKK	10	P37837	TALDO_HUMAN	203	192	1F05	Structure	203:A	1489	20.68	Intra	3	1	5	19382	5
GPLPVKR	5	P38159	RBMX_HUMAN	150	144	####		####	####	SGGPPPKR	6	P38159	RBMX_HUMAN	163	156	####		####	####	####	Intra	2	1	1	11837	4
HKIMLPPR	1	P38606	VATA_HUMAN	165	163	P38606	Modeller	165:A	1237	ALDEYYDKHFTEFVPLR	7	P38606	VATA_HUMAN	467	459	P38606	Modeller	467:A	3571	32.78	Intra	1	1	2	23165	5
HKIMLPPR	1	P38606	VATA_HUMAN	165	163	P38606	Modeller	165:A	1237	WDFTPCKNLR	6	P38606	VATA_HUMAN	139	132	P38606	Modeller	139:A	1040	9.89	Intra	1	1	2	20087	5
ILVKR	3	P38919	IF4A3_HUMAN	242	238	####		####	####	KGVAINFVK	0	P38919	IF4A3_HUMAN	374	373	####		####	####	####	Intra	2	1	1	19182	4
GSKSVAR	2	P39019	RS19_HUMAN	97	94	P39019	Phyre	97:A	756	GGAGVGSMTKIYGGR	9	P39019	RS19_HUMAN	77	67	P39019	Phyre	77:A	600	9.68	Intra	1	1	6	14460	4
GSKSVAR	2	P39019	RS19_HUMAN	97	94	P39019	Phyre	97:A	756	GGAGVGSM[147.04]TKIYGGR	9	P39019	RS19_HUMAN	77	67	P39019	Phyre	77:A	600	9.68	Intra	1	1	6	11388	4
GSKSVAR	2	P39019	RS19_HUMAN	97	94	P39019	Phyre	97:A	756	KLTPQGQR	0	P39019	RS19_HUMAN	122	121	P39019	Phyre	122:A	949	20.58	Intra	3	1	6	8682	4
GSKSVAR	2	P39019	RS19_HUMAN	97	94	P39019	Phyre	97:A	756	MVEKDQDGGR	3	P39019	RS19_HUMAN	115	111	P39019	Phyre	115:A	896	20.73	Intra	3	1	6	8165	4
KLTPQGQR	0	P39019	RS19_HUMAN	122	121	P39019	Phyre	122:A	949	GGAGVGSMTKIYGGR	9	P39019	RS19_HUMAN	77	67	P39019	Phyre	77:A	600	19.91	Intra	2	1	6	15630	4
MVEKDQDGGR	3	P39019	RS19_HUMAN	115	111	P39019	Phyre	115:A	896	GGAGVGSMTKIYGGR	9	P39019	RS19_HUMAN	77	67	P39019	Phyre	77:A	600	22.59	Intra	1	1	6	15978	4
DGKLIK	2	P39023	RL3_HUMAN	297	294	P39023	Phyre	297:A	2400	IYKIGQGYLIK	2	P39023	RL3_HUMAN	286	283	P39023	Phyre	286:A	2317	22.16	Intra	2	1	7	22861	4
FQTMEEKK	6	P39023	RL3_HUMAN	385	378	P39023	Phyre	385:A	3101	IYKIGQGYLIK	2	P39023	RL3_HUMAN	286	283	P39023	Phyre	286:A	2317	26.55	Intra	2	1	7	21396	4
GYKGVTSR	2	P39023	RL3_HUMAN	229	226	P39023	Phyre	229:A	1851	AGQKGYHHR	3	P39023	RL3_HUMAN	272	268	P39023	Phyre	272:A	2191	6.62	Intra	1	1	7	6393	5
IYKIGQGYLIK	2	P39023	RL3_HUMAN	286	283	P39023	Phyre	286:A	2317	FIDTTSKFGHGR	6	P39023	RL3_HUMAN	373	366	P39023	Phyre	373:A	2999	20.33	Intra	3	1	7	20841	5
IYKIGQGYLIK	2	P39023	RL3_HUMAN	286	283	P39023	Phyre	286:A	2317	LIKNNASTDYDLSDK	2	P39023	RL3_HUMAN	300	297	P39023	Phyre	300:A	2425	15.12	Intra	4	1	7	22531	4
KFSAPR	0	P39023	RL3_HUMAN	5	4	P39023	Phyre	5:A	37	KVACIGAWHPAR	0	P39023	RL3_HUMAN	250	249	P39023	Phyre	250:A	2030	21.67	Intra	1	1	7	15049	5
SLLVQTKR	6	P39023	RL3_HUMAN	356	349	P39023	Phyre	356:A	2857	IYKIGQGYLIK	2	P39023	RL3_HUMAN	286	283	P39023	Phyre	286:A	2317	19.76	Intra	3	1	7	22147	4
KGDLLK	0	Q8WXH0	SYNE2_HUMAN	4586	4585	####		####	####	IYKIGQGYLIK	2	P39023	RL3_HUMAN	286	283	P39023	Phyre	286:A	2317	####	2	2	0.88	1	22796	4
GIGPKR	4	P39748	FEN1_HUMAN	244	239	1UL1	Structure	4:Z	4727	AVDLIQKHK	6	P39748	FEN1_HUMAN	252	245	1UL1	Structure	252:Z	6503	20.97	Intra	1	0.91	1	13287	5
KANEK	0	P40121	CAPG_HUMAN	300	299	1J72	Structure	300:A	2119	IYIWKGR	4	P40121	CAPG_HUMAN	297	292	1J72	Structure	297:A	2099	5.34	Intra	4	1	1	15695	4
SVTLLIKGPNK	6	P40227	TCPZ_HUMAN	377	370	P40227	Phyre	377:A	2863	FTFIEKCNNPR	5	P40227	TCPZ_HUMAN	365	359	P40227	Phyre	365:A	2770	22.57	Intra	2	1	1	22838	4
KFAYLGR	0	P40429	RL13A_HUMAN	134	133	P40429	Phyre	134:A	1064	LAAIVAKQVLLGR	6	P40429	RL13A_HUMAN	25	18	P40429	Phyre	25:A	168	27.69	Intra	4	1	9	27133	4
KFAYLGR	0	P40429	RL13A_HUMAN	134	133	P40429	Phyre	134:A	1064	LAHEVGWKYQAVTATLEEK	7	P40429	RL13A_HUMAN	148	140	P40429	Phyre	148:A	1181	25.23	Intra	5	1	9	23472	5
KFAYLGR	0	P40429	RL13A_HUMAN	134	133	P40429	Phyre	134:A	1064	LKYLAFLR	1	P40429	RL13A_HUMAN	53	51	P40429	Phyre	53:A	392	15.47	Intra	1	1	9	26877	4
KFAYLGR	0	P40429	RL13A_HUMAN	134	133	P40429	Phyre	134:A	1064	MVVPAALKVVR	7	P40429	RL13A_HUMAN	125	117	P40429	Phyre	125:A	988	10.94	Intra	3	1	9	24889	4
KFAYLGR	0	P40429	RL13A_HUMAN	134	133	P40429	Phyre	134:A	1064	M[147.04]VVPAALKVVR	7	P40429	RL13A_HUMAN	125	117	P40429	Phyre	125:A	988	10.94	Intra	1	1	9	22661	4
KVVVVR	0	P40429	RL13A_HUMAN	32	31	P40429	Phyre	32:A	224	KFAYLGR	0	P40429	RL13A_HUMAN	134	133	P40429	Phyre	134:A	1064	32.19	Intra	3	1	9	17871	4
LKPTR	1	P40429	RL13A_HUMAN	130	128	P40429	Phyre	130:A	1030	LAAIVAKQVLLGR	6	P40429	RL13A_HUMAN	25	18	P40429	Phyre	25:A	168	25.35	Intra	1	1	9	23503	4
LKPTR	1	P40429	RL13A_HUMAN	130	128	P40429	Phyre	130:A	1030	LKYLAFLR	1	P40429	RL13A_HUMAN	53	51	P40429	Phyre	53:A	392	21.84	Intra	2	1	9	22889	4
MVVPAALKVVR	7	P40429	RL13A_HUMAN	125	117	P40429	Phyre	125:A	988	LAAIVAKQVLLGR	6	P40429	RL13A_HUMAN	25	18	P40429	Phyre	25:A	168	19.34	Intra	2	1	9	30394	4
DLLKANVK	3	P40925	MDHC_HUMAN	103	99	P40925	Phyre	103:A	762	IFKSQGAALDK	2	P40925	MDHC_HUMAN	110	107	P40925	Phyre	110:A	819	11.06	Intra	2	1	11	18824	4
GAAVIKAR	5	P40925	MDHC_HUMAN	236	230	P40925	Phyre	236:A	1776	EKMDLTAK	1	P40925	MDHC_HUMAN	312	310	P40925	Phyre	312:A	2370	26.81	Intra	1	1	11	15121	4
GAAVIKAR	5	P40925	MDHC_HUMAN	236	230	P40925	Phyre	236:A	1776	KLSSAMSAAK	0	P40925	MDHC_HUMAN	239	238	P40925	Phyre	239:A	1801	5.2	Intra	6	1	11	12956	4
GAAVIKAR	5	P40925	MDHC_HUMAN	236	230	P40925	Phyre	236:A	1776	KLSSAM[147.04]SAAK	0	P40925	MDHC_HUMAN	239	238	P40925	Phyre	239:A	1801	5.2	Intra	7	1	11	10671	4
KLSSAMSAAK	0	P40925	MDHC_HUMAN	239	238	P40925_P40925	Docking	239:A	1801	KLSSAMSAAK	0	P40925	MDHC_HUMAN	239	238	P40925_P40925	Docking	239:B	1801	15.62	1	1	1	11	12909	4
KLSSAM[147.04]SAAK	0	P40925	MDHC_HUMAN	239	238	P40925	Phyre	239:A	1801	KLSSAMSAAK	0	P40925	MDHC_HUMAN	239	238	P40925	Phyre	239:A	1801	0	1	3	1	11	10714	4
KLSSAM[147.04]SAAK	0	P40925	MDHC_HUMAN	239	238	P40925_P40925	Docking	239:A	1801	KLSSAM[147.04]SAAK	0	P40925	MDHC_HUMAN	239	238	P40925_P40925	Docking	239:B	1801	15.62	1	4	1	11	8486	4
LQGKEVGVYEALKDDSWLK	3	P40925	MDHC_HUMAN	205	201	P40925	Phyre	205:A	1534	NVIIWGNHSSTQYPDVNHAKVK	19	P40925	MDHC_HUMAN	199	179	P40925	Phyre	199:A	1488	9.96	Intra	5	1	11	23262	5
NVIIWGNHSSTQYPDVNHAKVK	19	P40925	MDHC_HUMAN	199	179	P40925	Phyre	199:A	1488	EVGVYEALKDDSWLKGEFVTTVQQR	14	P40925	MDHC_HUMAN	220	205	P40925	Phyre	220:A	1657	16.39	Intra	1	1	11	27146	6
TWKFVEGLPINDFSR	2	P40925	MDHC_HUMAN	298	295	P40925	Phyre	298:A	2254	LQGKEVGVYEALKDDSWLK	3	P40925	MDHC_HUMAN	205	201	P40925	Phyre	205:A	1534	28.38	Intra	2	1	11	32552	4
TWKFVEGLPINDFSR	2	P40925	MDHC_HUMAN	298	295	P40925	Phyre	298:A	2254	NVIIWGNHSSTQYPDVNHAKVK	19	P40925	MDHC_HUMAN	199	179	P40925	Phyre	199:A	1488	20.28	Intra	10	1	11	26422	5
IQEAGTEVVKAK	9	P40926	MDHM_HUMAN	239	229	2DFD	Structure	221:C	6196	VNVPVIGGHAGKTIIPLISQCTPK	11	P40926	MDHM_HUMAN	203	191	2DFD	Structure	185:C	5923	18.12	Intra	2	1	5	24065	5
KGEDFVK	0	P40926	MDHM_HUMAN	329	328	2DFD	Structure	311:B	4548	IQEAGTEVVKAK	9	P40926	MDHM_HUMAN	239	229	2DFD	Structure	221:B	3889	26.53	Intra	1	1	5	14332	4
KPGMTR	0	P40926	MDHM_HUMAN	105	104	2DFD	Structure	87:D	7515	KPGMTR	0	P40926	MDHM_HUMAN	105	104	2DFD	Structure	87:A	578	11.73	1	3	1	5	9478	4
KPGM[147.04]TR	0	P40926	MDHM_HUMAN	105	104	2DFD	Structure	87:D	7515	KPGMTR	0	P40926	MDHM_HUMAN	105	104	2DFD	Structure	87:A	578	11.73	1	3	1	5	8083	4
KPGM[147.04]TR	0	P40926	MDHM_HUMAN	105	104	2DFD	Structure	87:D	7515	KPGM[147.04]TR	0	P40926	MDHM_HUMAN	105	104	2DFD	Structure	87:A	578	11.73	1	6	1	5	6283	4
TILKDATLTALDR	3	P40939	ECHA_HUMAN	390	386	P40939	Phyre	390:A	2541	KLDSLTTSFGFPVGAATLVDEVGVDVAKHVAEDLGK	27	P40939	ECHA_HUMAN	597	569	P40939	Phyre	597:A	4122	29.8	Intra	2	1	1	45727	5
EGIIPANYVQKR	10	P41240	CSK_HUMAN	67	56	####		####	####	AGTKLSLMPWFHGK	3	P41240	CSK_HUMAN	76	72	####		####	####	####	Intra	1	1	1	26447	5
AVAELKAR	5	P41250	GARS_HUMAN	99	93	####		####	####	FQNVADLHLYLYSAKAQVSGQSAR	14	P41250	GARS_HUMAN	379	364	####		####	####	####	Intra	3	1	1	24352	5
FPGAYLKGK	6	P41252	SYIC_HUMAN	285	278	P41252	Phyre	285:A	2255	FGNWLKDAR	5	P41252	SYIC_HUMAN	450	444	P41252	Phyre	450:A	3489	24.17	Intra	7	1	7	21884	4
FPGAYLKGK	6	P41252	SYIC_HUMAN	285	278	P41252	Phyre	285:A	2255	KYRPLFDYFLK	0	P41252	SYIC_HUMAN	288	287	P41252	Phyre	288:A	2277	8.32	Intra	5	1	7	25482	5
SDTPLIYKAVPSWFVR	7	P41252	SYIC_HUMAN	410	402	P41252	Phyre	410:A	3151	FGWDCHGLPVEYEIDKTLGIR	15	P41252	SYIC_HUMAN	98	82	P41252	Phyre	98:A	792	27.11	Intra	5	1	7	39119	4
SDTPLIYKAVPSWFVR	7	P41252	SYIC_HUMAN	410	402	P41252	Phyre	410:A	3151	GPEDVAKMGITEYNNQCR	6	P41252	SYIC_HUMAN	110	103	P41252	Phyre	110:A	844	28	Intra	1	1	7	31816	4
SDTPLIYKAVPSWFVR	7	P41252	SYIC_HUMAN	410	402	P41252	Phyre	410:A	3151	GVKVMPFSTACNTPLSNFESHQNYK	2	P41252	SYIC_HUMAN	177	174	P41252	Phyre	177:A	1421	7.73	Intra	1	1	7	33377	5
TLKEQGR	2	P41252	SYIC_HUMAN	382	379	P41252	Phyre	382:A	2916	DADKSIIR	3	P41252	SYIC_HUMAN	375	371	P41252	Phyre	375:A	2859	10.74	Intra	5	1	7	13211	4
YSAEWKSTVSR	5	P41252	SYIC_HUMAN	132	126	P41252	Phyre	132:A	1028	FGWDCHGLPVEYEIDKTLGIR	15	P41252	SYIC_HUMAN	98	82	P41252	Phyre	98:A	792	23.72	Intra	3	1	7	31044	5
DDQLKVHGF	4	P41567	EIF1_HUMAN	109	104	4KZY	Structure	109:l	77758	KNICQFLVEIGLAK	0	P41567	EIF1_HUMAN	91	90	4KZY	Structure	91:l	77616	11.71	Intra	2	1	1	36479	4
KATASR	0	P42126	ECI1_HUMAN	260	259	1SG4	Structure	218:C	5789	KATASR	0	P42126	ECI1_HUMAN	260	259	1SG4	Structure	218:A	1797	22.14	1	3	0.97	2	4902	4
KATASR	0	P42126	ECI1_HUMAN	260	259	1SG4	Structure	218:C	5789	SPAHYAGYWKAVQELWLR	9	P42126	ECI1_HUMAN	126	116	1SG4	Structure	84:C	4747	18.92	Intra	4	1	2	26423	5
EKTLR	1	P42704	LPPRC_HUMAN	991	989	P42704	Modeller	991:A	7870	LFECDRDQMYYNLLKLYK	14	P42704	LPPRC_HUMAN	963	948	P42704	Modeller	963:A	7629	39.24	Intra	1	1	2	26270	5
LTDYCKK	5	P42704	LPPRC_HUMAN	395	389	P42704	Modeller	395:A	3079	AVKEEGFPIRPHYFWPLLVGR	2	P42704	LPPRC_HUMAN	431	428	P42704	Modeller	431:A	3362	25.94	Intra	1	1	2	25518	6
KEELLK	0	P42766	RL35_HUMAN	14	13	P42766	Phyre	14:A	106	YKPLDLRPK	1	P42766	RL35_HUMAN	79	77	P42766	Phyre	79:A	630	23.97	Intra	1	1	2	16898	5
YKPLDLRPK	1	P42766	RL35_HUMAN	79	77	P42766	Phyre	79:A	630	VLTVINQTQKENLR	9	P42766	RL35_HUMAN	66	56	P42766	Phyre	66:A	510	12.89	Intra	3	1	2	18808	5
LLVKLYR	3	Q07020	RL18_HUMAN	30	26	5T2C	Structure	####	####	VAKVTGGAASK	2	P42766	RL35_HUMAN	35	32	5T2C	Structure	####	####	####	1	2	1	1	18110	4
EGKIVR	2	P43003	EAA1_HUMAN	160	157	P43003	Phyre	160:A	945	TNYEKR	4	P43003	EAA1_HUMAN	196	191	P43003	Phyre	196:A	1545	####	Intra	1	0.97	1	9907	4
SGKPGPFLLSGSR	2	P43034	LIS1_HUMAN	306	303	P43034	Phyre	306:A	1654	MWEVQTGYCVKTFTGHR	10	P43034	LIS1_HUMAN	228	217	P43034	Phyre	228:A	1042	27.75	Intra	2	1	2	23733	5
VWVVATKECK	6	P43034	LIS1_HUMAN	266	259	P43034	Phyre	266:A	1347	MWEVQTGYCVKTFTGHR	10	P43034	LIS1_HUMAN	228	217	P43034	Phyre	228:A	1042	25.48	Intra	1	1	2	22202	5
KALWFQGR	0	P43243	MATR3_HUMAN	555	554	####		####	####	VIHLSNLPHSGYSDSAVLKLAEPYGK	18	P43243	MATR3_HUMAN	515	496	####		####	####	####	Intra	1	1	1	24386	5
IILKASR	3	P43246	MSH2_HUMAN	635	631	3THX	Structure	635:A	4707	DKQMFHIITGPNMGGK	1	P43246	MSH2_HUMAN	661	659	3THX	Structure	661:A	4902	17.5	Intra	3	1	2	21673	5
IILKASR	3	P43246	MSH2_HUMAN	635	631	3THX	Structure	635:A	4707	KGVCDQSFGIHVAELANFPK	0	P43246	MSH2_HUMAN	819	818	3THX	Structure	819:A	6045	14.48	Intra	3	1	2	24547	5
TKQTAR	1	P68431	H31_HUMAN	5	3	5AV9	Structure	####	####	WKGFSEEHNTWEPEK	1	P45973	CBX5_HUMAN	42	40	3FDT	Structure	26:A	204	####	1	2	1	1	14491	5
VSSVFKDEATVR	5	P46060	RAGP1_HUMAN	481	475	5D2M	Structure	481:C	4553	VKAIANLYGPLMALNHMVQQDYFPK	1	P46060	RAGP1_HUMAN	530	528	5D2M	Structure	530:C	5347	23.85	Intra	1	1	1	36197	5
LKSVVGNLHR	1	P46087	NOP2_HUMAN	423	421	P46087	Phyre	423:A	1049	LVSLGTCFGKFTK	9	Q9Y221	NIP7_HUMAN	72	62	1SQW	Structure	72:A	574	####	1	2	1	1	21836	5
VLQDDKK	5	P46379	BAG6_HUMAN	70	64	4DWF	Structure	70:A	465	LQEYNVGGKVIHLVER	8	P46379	BAG6_HUMAN	80	71	4DWF	Structure	80:A	549	16.81	Intra	3	1	1	20888	5
AYFKR	3	P46777	RL5_HUMAN	14	10	P46777	Phyre	14:A	47	YQVKFR	3	P46777	RL5_HUMAN	19	15	P46777	Phyre	19:A	95	14.34	Intra	3	1	11	15901	4
EGKTDYYAR	2	P46777	RL5_HUMAN	27	24	P46777	Phyre	27:A	172	WNRPKMSLAQK	4	P46777	RL5_HUMAN	270	265	P46777	Phyre	270:A	2133	28.08	Intra	2	1	11	14139	5
KQFSQYIK	0	P46777	RL5_HUMAN	221	220	P46777	Phyre	221:A	1712	TTTGNKVFGALK	5	P46777	RL5_HUMAN	158	152	P46777	Phyre	158:A	1209	23.75	Intra	2	1	11	20980	4
LVIQDKNK	5	P46777	RL5_HUMAN	41	35	P46777	Phyre	41:A	296	EGKTDYYAR	2	P46777	RL5_HUMAN	27	24	P46777	Phyre	27:A	172	27.29	Intra	2	1	11	14048	4
TTTGNKVFGALK	5	P46777	RL5_HUMAN	158	152	P46777	Phyre	158:A	1209	KHIMGQNVADYMR	0	P46777	RL5_HUMAN	197	196	P46777	Phyre	197:A	1508	13.65	Intra	3	1	11	19371	5
TTTGNKVFGALK	5	P46777	RL5_HUMAN	158	152	P46777	Phyre	158:A	1209	KHIMGQNVADYM[147.04]R	0	P46777	RL5_HUMAN	197	196	P46777	Phyre	197:A	1508	13.65	Intra	5	1	11	17307	5
TTTGNKVFGALK	5	P46777	RL5_HUMAN	158	152	P46777	Phyre	158:A	1209	KHIM[147.04]GQNVADYMR	0	P46777	RL5_HUMAN	197	196	P46777	Phyre	197:A	1508	13.65	Intra	5	1	11	17812	4
TTTGNKVFGALK	5	P46777	RL5_HUMAN	158	152	P46777	Phyre	158:A	1209	KHIM[147.04]GQNVADYM[147.04]R	0	P46777	RL5_HUMAN	197	196	P46777	Phyre	197:A	1508	13.65	Intra	8	1	11	15840	5
YNTPKYR	4	P46777	RL5_HUMAN	48	43	P46777	Phyre	48:A	356	GAVDGGLSIPHSTKR	13	P46777	RL5_HUMAN	178	164	P46777	Phyre	178:A	1346	24.67	Intra	2	1	11	14103	4
YNTPKYR	4	P46777	RL5_HUMAN	48	43	P46777	Phyre	48:A	356	LVIQDKNK	5	P46777	RL5_HUMAN	41	35	P46777	Phyre	41:A	296	11.68	Intra	2	1	11	12867	4
YQVKFR	3	P46777	RL5_HUMAN	19	15	P46777	Phyre	19:A	95	EGKTDYYAR	2	P46777	RL5_HUMAN	27	24	P46777	Phyre	27:A	172	12.18	Intra	4	1	11	15024	4
GVVVVIKR	6	P46779	RL28_HUMAN	65	58	####		####	####	KPATSYVR	0	P46779	RL28_HUMAN	72	71	####		####	####	####	Intra	7	1	3	16486	4
GVVVVIKR	6	P46779	RL28_HUMAN	65	58	####		####	####	NCSSFLIKR	7	P46779	RL28_HUMAN	19	11	####		####	####	####	Intra	1	1	3	20610	4
TTINKNAR	4	P46779	RL28_HUMAN	84	79	####		####	####	KPATSYVR	0	P46779	RL28_HUMAN	72	71	####		####	####	####	Intra	2	1	3	10628	4
KTVGVEPAADGK	0	P46779	RL28_HUMAN	47	46	####		####	####	SGPFGQIFRPDNFVFGQSGAGNNWAKGHYTEGAELVDSVLDVVR	25	P68371	TBB4B_HUMAN	103	77	P68371	Modeller	103:A	793	####	2	2	1	1	36294	5
KQVVNIPSFIVR	0	P46781	RS9_HUMAN	139	138	P46781	Phyre	139:A	1153	LDSQKHIDFSLR	4	P46781	RS9_HUMAN	155	150	P46781	Phyre	155:A	1282	11.5	Intra	10	1	2	26234	4
KTYVTPR	0	P46781	RS9_HUMAN	11	10	P46781	Phyre	11:A	69	RPFEKSR	4	P46781	RS9_HUMAN	22	17	P46781	Phyre	22:A	167	25.88	Intra	1	0.94	2	10457	5
KAQCPIVER	0	P46782	RS5_HUMAN	63	62	P46782	Phyre	63:A	424	YAKYLPHSAGR	2	P46782	RS5_HUMAN	47	44	P46782	Phyre	47:A	288	21.38	Intra	2	1	5	13251	5
VAKSNR	2	P46782	RS5_HUMAN	201	198	P46782	Phyre	201:A	1493	KAQCPIVER	0	P46782	RS5_HUMAN	63	62	P46782	Phyre	63:A	424	26.95	Intra	1	1	5	9587	4
VAKSNR	2	P46782	RS5_HUMAN	201	198	P46782	Phyre	201:A	1493	KKDELER	0	P46782	RS5_HUMAN	192	191	P46782	Phyre	192:A	1418	14.11	Intra	8	1	5	6627	4
VAKSNR	2	P46782	RS5_HUMAN	201	198	P46782	Phyre	201:A	1493	KKDELER	1	P46782	RS5_HUMAN	193	191	P46782	Phyre	193:A	1427	12.25	Intra	2	1	5	6583	4
YAAKR	3	P46782	RS5_HUMAN	59	55	P46782	Phyre	59:A	382	KAQCPIVER	0	P46782	RS5_HUMAN	63	62	P46782	Phyre	63:A	424	5.76	Intra	7	1	5	10384	4
NVKGPVR	2	P62857	RS28_HUMAN	47	44	5T2C	Structure	####	####	KKDELER	0	P46782	RS5_HUMAN	192	191	5T2C	Structure	####	####	####	1	1	0.87	2	9165	5
VAKSNR	2	P46782	RS5_HUMAN	201	198	5T2C	Structure	####	####	VQPIKLAR	4	P62857	RS28_HUMAN	10	5	5T2C	Structure	####	####	####	1	1	0.8	2	13002	4
AMQSLKSR	5	P46783	RS10_HUMAN	53	47	####		####	####	GYVKEQFAWR	3	P46783	RS10_HUMAN	59	55	####		####	####	####	Intra	1	1	1	18376	4
WKLLQVSVDDR	1	P46939	UTRO_HUMAN	2782	2780	####		####	####	VKTVNDLSSQLSPLDLHPSLK	1	P46939	UTRO_HUMAN	2750	2748	####		####	####	####	Intra	1	1	1	28728	5
KIYDR	0	P46940	IQGA1_HUMAN	94	93	####		####	####	LGNFFSPKVVSLK	7	P46940	IQGA1_HUMAN	88	80	####		####	####	####	Intra	6	1	1	23122	4
IYEPLDVKSK	7	P47712	PA24A_HUMAN	541	533	1CJY	Structure	1541:B	8282	KIHVVDSGLTFNLPYPLILRPQR	0	P47712	PA24A_HUMAN	544	543	1CJY	Structure	1544:B	8302	9.04	Intra	1	1	1	29797	6
KILQLVATGAVR	0	P47897	SYQ_HUMAN	498	497	P47897	Phyre	498:A	3646	GEELKGHNTLPSPWR	4	P47897	SYQ_HUMAN	366	361	####		####	####	####	Intra	4	1	3	22835	5
KILQLVATGAVR	0	P47897	SYQ_HUMAN	498	497	4YE6	Structure	498:A	3615	LVMEDGKMDPVAYR	6	P47897	SYQ_HUMAN	412	405	4YE6	Structure	412:A	2928	29.01	Intra	2	1	3	26384	4
VKYTPHHR	1	P47897	SYQ_HUMAN	421	419	4YE6	Structure	421:A	3007	KILQLVATGAVR	0	P47897	SYQ_HUMAN	498	497	4YE6	Structure	498:A	3615	24.72	Intra	3	1	3	16305	5
AGKAIVSR	2	P48444	COPD_HUMAN	14	11	P48444	Phyre	14:A	86	VWNYKLR	4	P53621	COPA_HUMAN	81	76	P53621	Phyre	81:A	670	####	1	1	0.8	1	17063	4
AQAQSQKAK	6	P49207	RL34_HUMAN	115	108	5T2C	Structure	####	####	NKWFFQK	1	P61353	RL27_HUMAN	128	126	5T2C	Structure	####	####	####	1	5	1	4	16542	4
IVVKVLK	3	P49207	RL34_HUMAN	105	101	5T2C	Structure	####	####	NKWFFQK	1	P61353	RL27_HUMAN	128	126	5T2C	Structure	####	####	####	1	4	1	4	23254	4
NKWFFQK	1	P61353	RL27_HUMAN	128	126	5T2C	Structure	####	####	LSYNTASNKTR	8	P49207	RL34_HUMAN	19	10	5T2C	Structure	####	####	####	1	3	1	4	18683	4
NKWFFQK	1	P61353	RL27_HUMAN	128	126	5T2C	Structure	####	####	VLKAQAQSQK	2	P49207	RL34_HUMAN	108	105	5T2C	Structure	####	####	####	1	1	0.95	4	18260	4
LSYNTASNKTR	8	P49207	RL34_HUMAN	19	10	5T2C	Structure	####	####	VELCSFSGYKIYPGHGR	9	P83731	RL24_HUMAN	12	2	5T2C	Structure	####	####	####	1	4	1	1	18392	5
IHLEIKQLNR	5	P49257	LMAN1_HUMAN	346	340	3A4U	Structure	####	####	IHLEIKQLNR	5	P49257	LMAN1_HUMAN	346	340	3A4U	Structure	####	####	####	N/A	5	1	1	19979	5
KLQELSSK	0	P49327	FAS_HUMAN	2186	2185	####		####	####	WKAGLYGLPR	1	P49327	FAS_HUMAN	41	39	P49327	Phyre	41:A	321	####	Intra	1	1	6	20440	4
VFTTVGSAEKR	9	P49327	FAS_HUMAN	1704	1694	P49327	Phyre	1704:A	12187	DGVVRPLKCTVFHGAQVEDAFR	7	P49327	FAS_HUMAN	1827	1819	P49327	Phyre	1827:A	13164	12.34	Intra	1	0.99	6	21392	5
VFTTVGSAEKR	9	P49327	FAS_HUMAN	1704	1694	P49327	Phyre	1704:A	12187	FLEIGKFDLSQNHPLGMAIFLK	5	P49327	FAS_HUMAN	1771	1765	P49327	Phyre	1771:A	12716	23.75	Intra	7	1	6	32949	6
VFTTVGSAEKR	9	P49327	FAS_HUMAN	1704	1694	P49327	Phyre	1704:A	12187	FLEIGKFDLSQNHPLGM[147.04]AIFLK	5	P49327	FAS_HUMAN	1771	1765	P49327	Phyre	1771:A	12716	23.75	Intra	2	1	6	29588	4
VLEALLPLKGLEER	8	P49327	FAS_HUMAN	2391	2382	####		####	####	VAAAVDLIIKSHQGLDR	9	P49327	FAS_HUMAN	2406	2396	####		####	####	####	Intra	2	1	6	31997	5
YMAQGKHIGK	5	P49327	FAS_HUMAN	1847	1841	P49327	Phyre	1847:A	13321	DGVVRPLKCTVFHGAQVEDAFR	7	P49327	FAS_HUMAN	1827	1819	P49327	Phyre	1827:A	13164	12.89	Intra	6	1	6	19046	5
FIDFFKR	5	P49588	SYAC_HUMAN	19	13	P49588	Phyre	19:A	154	AQTAPNKDVQR	6	P49588	SYAC_HUMAN	789	782	P49588	Phyre	789:A	5075	68.09	Intra	2	1	5	20521	4
FIDFFKR	5	P49588	SYAC_HUMAN	19	13	P49588	Phyre	19:A	154	KCLSVMEAK	0	P49588	SYAC_HUMAN	772	771	P49588	Phyre	772:A	4996	70.34	Intra	4	1	5	24005	4
FIDFFKR	5	P49588	SYAC_HUMAN	19	13	P49588	Phyre	19:A	154	KCLSVM[147.04]EAK	0	P49588	SYAC_HUMAN	772	771	P49588	Phyre	772:A	4996	70.34	Intra	2	1	5	22130	4
KIQSLGDSK	0	P49588	SYAC_HUMAN	396	395	P49588	Phyre	396:A	2591	YAHEKLNASR	4	P49588	SYAC_HUMAN	338	333	P49588	Phyre	338:A	2158	23.04	Intra	4	1	5	10400	5
SVLGEADQKGSLVAPDR	8	P49588	SYAC_HUMAN	625	616	P49588	Phyre	625:A	4023	AVYTQDCPLAAAKAIQGLR	12	P49588	SYAC_HUMAN	677	664	P49588	Phyre	677:A	4413	20.51	Intra	2	1	5	27079	4
ADNLNKLK	5	P49591	SYSC_HUMAN	55	49	3VBB	Structure	55:A	436	VDKGGDPALIR	2	P49591	SYSC_HUMAN	12	9	3VBB	Structure	12:A	86	21.71	Intra	2	1	1	17487	4
EKITAFVVER	1	P49748	ACADV_HUMAN	278	276	3B96	Structure	238:A	1576	VPSENVLGEVGSGFKVAMHILNNGR	14	P49748	ACADV_HUMAN	331	316	3B96	Structure	291:A	1968	10.68	Intra	2	1	5	37949	5
GILLFGTKAQK	7	P49748	ACADV_HUMAN	195	187	3B96	Structure	155:A	971	VPSENVLGEVGSGFKVAMHILNNGR	14	P49748	ACADV_HUMAN	331	316	3B96	Structure	291:A	1968	20.28	Intra	3	1	5	39273	5
GKELSGLGSALK	1	P49748	ACADV_HUMAN	482	480	3B96	Structure	442:A	3134	VPSENVLGEVGSGFKVAMHILNNGR	14	P49748	ACADV_HUMAN	331	316	3B96	Structure	291:A	1968	21.57	Intra	3	1	5	36883	5
KGIVNEQFLLQR	0	P49748	ACADV_HUMAN	556	555	3B96	Structure	516:A	3449	VPSENVLGEVGSGFKVAMHILNNGR	14	P49748	ACADV_HUMAN	331	316	3B96	Structure	291:A	1968	22.65	Intra	4	1	5	37945	5
NFKSISK	2	P49748	ACADV_HUMAN	635	632	3B96	Structure	595:A	4075	TQFGEKIHNFGLIQEK	5	P49748	ACADV_HUMAN	372	366	3B96	Structure	332:A	2270	48.46	Intra	1	1	5	20339	5
EIPAKIIFEDDR	4	P49773	HINT1_HUMAN	30	25	6B42	Structure	30:A	251	AQVARPGGDTIFGKIIR	13	P49773	HINT1_HUMAN	21	7	6B42	Structure	21:A	87	13.41	Intra	1	1	1	28129	5
AKLYR	1	P49792	RBP2_HUMAN	2338	2336	####		####	####	DQVLKLCANHR	4	P49792	RBP2_HUMAN	2379	2374	####		####	####	####	Intra	2	1	4	14825	5
AKLYR	1	P49792	RBP2_HUMAN	2338	2336	####		####	####	FKLQDVADSFKK	1	P49792	RBP2_HUMAN	2424	2422	####		####	####	####	Intra	3	1	4	19863	5
AKYWLER	1	P49792	RBP2_HUMAN	115	113	####		####	####	AAKLFPGSPAIYK	2	P49792	RBP2_HUMAN	123	120	####		####	####	####	Intra	1	1	4	23209	4
SVHYWKK	5	P49792	RBP2_HUMAN	607	601	4LQW	Structure	####	####	SVHYWKK	5	P49792	RBP2_HUMAN	607	601	4LQW	Structure	####	####	####	1	1	1	4	11915	5
TIEKFEK	3	P68104	EF1A1_HUMAN	41	37	P68104	Phyre	41:A	283	SVELNPTQKDLVLK	8	P49792	RBP2_HUMAN	94	85	4LQW	Structure	####	####	####	1	3	0.97	1	24846	4
WSFMNKPSDGRPK	5	P49821	NDUV1_HUMAN	104	98	5XTB	Structure	104:A	623	GPDWILGEIKTSGLR	9	P49821	NDUV1_HUMAN	81	71	5XTB	Structure	81:A	453	16.57	Intra	2	1	1	28477	5
DVYKK	3	P50395	GDIB_HUMAN	173	169	P50395	Phyre	173:A	1364	KSDIYVCMISFAHNVAAQGK	0	P50395	GDIB_HUMAN	329	328	P50395	Phyre	329:A	2603	24.14	Intra	1	1	8	26025	5
FKIPGSPPESMGR	1	P50395	GDIB_HUMAN	57	55	P50395	Phyre	57:A	423	EIRPALELLEPIEQKFVSISDLLVPK	14	P50395	GDIB_HUMAN	379	364	P50395	Phyre	379:A	2995	12.4	Intra	1	1	8	48007	5
KFDLGQDVIDFTGHALALYR	0	P50395	GDIB_HUMAN	174	173	P50395	Phyre	174:A	1373	KFDLGQDVIDFTGHALALYR	0	P50395	GDIB_HUMAN	174	173	P50395	Phyre	174:A	1373	####	N/A	1	1	8	38676	5
KFLVYVANFDEKDPR	0	P50395	GDIB_HUMAN	142	141	P50395	Phyre	142:A	1102	KFDLGQDVIDFTGHALALYR	0	P50395	GDIB_HUMAN	174	173	P50395	Phyre	174:A	1373	10.81	Intra	1	1	8	36268	5
KFLVYVANFDEKDPR	0	P50395	GDIB_HUMAN	142	141	P50395	Phyre	142:A	1102	VPSTEAEALASSLMGLFEKR	18	P50395	GDIB_HUMAN	137	118	P50395	Phyre	137:A	1049	8.66	Intra	3	1	8	39787	5
KTTMR	0	P50395	GDIB_HUMAN	165	164	P50395	Phyre	165:A	1295	KFDLGQDVIDFTGHALALYR	0	P50395	GDIB_HUMAN	174	173	P50395	Phyre	174:A	1373	14.01	Intra	6	1	8	32957	5
KTTMR	0	P50395	GDIB_HUMAN	165	164	P50395	Phyre	165:A	1295	NIYKR	3	P50395	GDIB_HUMAN	422	418	P50395	Phyre	422:A	3341	28.11	Intra	1	1	8	9629	4
VEKVGQVIR	2	P50395	GDIB_HUMAN	293	290	P50395	Phyre	293:A	2323	FKIPGSPPESMGR	1	P50395	GDIB_HUMAN	57	55	P50395	Phyre	57:A	423	30.27	Intra	1	1	8	20025	4
KAVAISLPK	0	P50454	SERPH_HUMAN	300	299	P50454	Phyre	300:A	2190	SPKLFYADHPFIFLVR	2	P50454	SERPH_HUMAN	380	377	P50454	Phyre	380:A	2806	8.42	Intra	9	1	1	30885	4
LAILYAKR	6	P50502	F10A1_HUMAN	153	146	P50502	Phyre	153:A	300	ASVFVKLQKPNAAIR	5	P50502	F10A1_HUMAN	160	154	P50502	Phyre	160:A	350	10.57	Intra	1	1	2	21958	5
LAILYAKR	6	P50502	F10A1_HUMAN	153	146	P50502	Phyre	153:A	300	KVAAIEALNDGELQK	0	P50502	F10A1_HUMAN	118	117	P50502	Phyre	118:A	32	9.36	Intra	4	1	2	24511	4
ATVMLYDDGNKR	10	P50552	VASP_HUMAN	21	10	1EGX	Structure	21:A	295	GVKYNQATPNFHQWR	2	P50552	VASP_HUMAN	71	68	1EGX	Structure	71:A	1091	19.97	Intra	1	1	2	17822	4
ATVM[147.04]LYDDGNKR	10	P50552	VASP_HUMAN	21	10	1EGX	Structure	21:A	295	GVKYNQATPNFHQWR	2	P50552	VASP_HUMAN	71	68	1EGX	Structure	71:A	1091	19.97	Intra	3	1	2	16840	5
KQVVK	0	P50570	DYN2_HUMAN	415	414	P50570	Phyre	415:A	3803	EISYAIKNIHGVR	6	P50570	DYN2_HUMAN	393	386	P50570	Phyre	393:A	3662	15.52	Intra	1	0.91	1	15287	5
LCKTVGATALPR	2	P50990	TCPQ_HUMAN	326	323	P50990	Phyre	326:A	2366	MVINHLEKLFVTNDAATILR	7	P50990	TCPQ_HUMAN	62	54	P50990	Phyre	62:A	352	37.68	Intra	2	1	4	29261	5
LNSKWDLR	3	P50990	TCPQ_HUMAN	318	314	P50990	Phyre	318:A	2291	ILGSGISSSSVLHGMVFKK	17	P50990	TCPQ_HUMAN	224	206	P50990	Phyre	224:A	1585	11.74	Intra	5	1	4	24456	4
LNSKWDLR	3	P50990	TCPQ_HUMAN	318	314	P50990	Phyre	318:A	2291	LCKTVGATALPR	2	P50990	TCPQ_HUMAN	326	323	P50990	Phyre	326:A	2366	11.86	Intra	2	1	4	19937	4
LNSKWDLR	3	P50990	TCPQ_HUMAN	318	314	P50990	Phyre	318:A	2291	MVINHLEKLFVTNDAATILR	7	P50990	TCPQ_HUMAN	62	54	P50990	Phyre	62:A	352	31.5	Intra	5	1	4	30856	5
ILGSGISSSSVLHGMVFKK	17	P50990	TCPQ_HUMAN	224	206	P50990_Q99832	Docking	224:A	1585	ATISNDGATILKLLDVVHPAAK	11	Q99832	TCPH_HUMAN	67	55	P50990_Q99832	Docking	67:B	409	27.26	1	1	0.97	2	33783	5
YNFFTGCPKAK	8	Q99832	TCPH_HUMAN	366	357	P50990_Q99832	Docking	366:B	2728	VADMALHYANKYNIMLVR	10	P50990	TCPQ_HUMAN	307	296	P50990_Q99832	Docking	307:A	2198	16.6	1	1	0.9	2	26082	5
AYILNLVKQIK	7	P50991	TCPD_HUMAN	288	280	P50991	Phyre	288:A	2001	DALSDLALHFLNKMK	12	P50991	TCPD_HUMAN	319	306	P50991	Phyre	319:A	2245	11.38	Intra	12	1	5	41686	5
AYILNLVKQIK	7	P50991	TCPD_HUMAN	288	280	P50991	Phyre	288:A	2001	DALSDLALHFLNKM[147.04]K	12	P50991	TCPD_HUMAN	319	306	P50991	Phyre	319:A	2245	11.38	Intra	6	1	5	36966	5
GKGAYQDR	1	P50991	TCPD_HUMAN	21	19	####		####	####	GKGAYQDR	1	P50991	TCPD_HUMAN	21	19	####		####	####	####	N/A	2	1	5	7823	4
KTGCNVLLIQK	0	P50991	TCPD_HUMAN	292	291	P50991	Phyre	292:A	2036	AYILNLVKQIK	7	P50991	TCPD_HUMAN	288	280	P50991	Phyre	288:A	2001	5.93	Intra	4	1	5	28604	4
KTGCNVLLIQK	0	P50991	TCPD_HUMAN	292	291	P50991	Phyre	292:A	2036	DALSDLALHFLNKMK	12	P50991	TCPD_HUMAN	319	306	P50991	Phyre	319:A	2245	13.51	Intra	5	1	5	36956	4
DKPAQIR	1	P50991	TCPD_HUMAN	29	27	P50991_P78371	Docking	29:A	55	VDNIIKAAPR	5	P78371	TCPB_HUMAN	522	516	P50991_P78371	Docking	522:B	3815	19.14	1	1	0.71	2	15618	4
GKGAYQDR	1	P50991	TCPD_HUMAN	21	19	P50991_P78371	Docking	21:A	####	VDNIIKAAPR	5	P78371	TCPB_HUMAN	522	516	P50991_P78371	Docking	522:B	3815	####	1	4	1	2	13653	4
KILLK	0	P50995	ANX11_HUMAN	495	494	P50995	Phyre	495:A	2400	MYGKSLYHDISGDTSGDYR	3	P50995	ANX11_HUMAN	479	475	P50995	Phyre	479:A	2273	17.84	Intra	4	1	3	19410	5
KILLK	0	P50995	ANX11_HUMAN	495	494	P50995	Phyre	495:A	2400	M[147.04]YGKSLYHDISGDTSGDYR	3	P50995	ANX11_HUMAN	479	475	P50995	Phyre	479:A	2273	17.84	Intra	3	1	3	18350	4
SEYKR	3	P50995	ANX11_HUMAN	474	470	P50995	Phyre	474:A	2229	MYGKSLYHDISGDTSGDYR	3	P50995	ANX11_HUMAN	479	475	P50995	Phyre	479:A	2273	6.12	Intra	1	1	3	15955	4
IAAMHVKR	6	P51003	PAPOA_HUMAN	489	482	P51003	Phyre	489:A	3831	YKHYIVLLASAPTEK	1	P51003	PAPOA_HUMAN	372	370	P51003	Phyre	372:A	2882	5.64	Intra	1	1	1	18295	5
YLLYGEKGTGK	6	P51398	RT29_HUMAN	130	123	P51398	Phyre	130:A	483	NDWHGGAIVSALSQTGSLFKPR	19	P51398	RT29_HUMAN	318	298	P51398	Phyre	318:A	1990	12.72	Intra	1	1	1	28356	4
EGANKLR	4	P51648	AL3A2_HUMAN	437	432	4QGK	Structure	437:A	3480	FFLLKR	4	P51648	AL3A2_HUMAN	457	452	4QGK	Structure	457:A	3652	19	Intra	1	0.95	1	20449	4
LQMILKDYAK	5	P51659	DHB4_HUMAN	731	725	####		####	####	KVNAVFEWHITK	0	P51659	DHB4_HUMAN	645	644	####		####	####	####	Intra	1	1	1	24934	5
LGAGPDGVEEIKR	11	P51812	KS6A3_HUMAN	322	310	####		####	####	HSFFSTIDWNKLYR	10	P51812	KS6A3_HUMAN	334	323	####		####	####	####	Intra	6	1	1	25802	5
FQDTDGKHLLPK	6	P52209	6PGD_HUMAN	248	241	2JKV	Structure	248:A	1871	DYFGAHTYELLAKPGQFIHTNWTGHGGTVSSSSYNA	12	P52209	6PGD_HUMAN	460	447	2JKV	Structure	460:A	3530	66.59	Intra	1	1	1	25175	4
INEILSNALKR	9	P52272	HNRPM_HUMAN	381	371	####		####	####	GEIIAKQGGGGGGGSVPGIER	5	P52272	HNRPM_HUMAN	388	382	####		####	####	####	Intra	2	1	3	22197	4
VGWKK	3	P52272	HNRPM_HUMAN	218	214	2DO0	Structure	217:A	402	LKEVFSMAGVVVR	1	P52272	HNRPM_HUMAN	221	219	2DO0	Structure	220:A	465	5.37	Intra	2	1	3	24371	4
WQSLKDLVK	4	P52272	HNRPM_HUMAN	88	83	P52272	Phyre	88:A	171	FEPYANPTKR	8	P52272	HNRPM_HUMAN	69	60	P52272	Phyre	69:A	2	18.34	Intra	4	1	3	22025	4
GSYSIKSR	5	P52565	GDIR1_HUMAN	178	172	1HH4	Structure	478:D	4133	FTDDDKTDHLSWEWNLTIK	5	P52565	GDIR1_HUMAN	186	180	1HH4	Structure	486:D	4201	16.96	Intra	1	1	6	24047	5
IKISFR	1	P52565	GDIR1_HUMAN	113	111	1HH4	Structure	413:D	3627	EIVSGMKYIQHTYR	6	P52565	GDIR1_HUMAN	127	120	1HH4	Structure	427:D	3734	12.75	Intra	2	1	6	20680	5
IKISFR	1	P52565	GDIR1_HUMAN	113	111	1HH4	Structure	413:D	3627	GSYSIKSR	5	P52565	GDIR1_HUMAN	178	172	1HH4	Structure	478:D	4133	17.23	Intra	2	1	6	17669	4
IKISFR	1	P52565	GDIR1_HUMAN	113	111	1HH4	Structure	413:E	5041	YKEALLGR	1	P52565	GDIR1_HUMAN	52	50	1HH4	Structure	352:E	4587	27.27	Intra	7	1	6	20923	4
KDWKD	3	P52565	GDIR1_HUMAN	203	199	####		####	####	IKISFR	1	P52565	GDIR1_HUMAN	113	111	####		####	####	####	Intra	2	1	6	18261	4
KQSFVLK	0	P52565	GDIR1_HUMAN	99	98	1HH4	Structure	399:E	4922	GSYSIKSR	5	P52565	GDIR1_HUMAN	178	172	1HH4	Structure	478:E	5561	13.45	Intra	2	1	6	15769	4
YIEVFKSHR	5	P52597	HNRPF_HUMAN	87	81	2KG1	Structure	####	####	YIEVFKSHR	5	P52597	HNRPF_HUMAN	87	81	2KG1	Structure	####	####	####	1	1	1	1	13413	5
GWVSKR	4	P52701	MSH6_HUMAN	145	140	####		####	####	LLKPYTGSK	2	P52701	MSH6_HUMAN	149	146	####		####	####	####	Intra	1	0.91	2	16236	4
GYKVAR	2	P52701	MSH6_HUMAN	479	476	2O8B	Structure	479:B	8138	KWWQIK	0	P52701	MSH6_HUMAN	412	411	2O8B	Structure	412:B	7585	19.02	Intra	2	1	2	18499	4
ETFLTQKLR	6	P52948	NUP98_HUMAN	1608	1601	####		####	####	HLEALCLFKAEHWNR	8	P52948	NUP98_HUMAN	1639	1630	####		####	####	####	Intra	6	1	1	24386	4
ADEVAPAKK	7	P53396	ACLY_HUMAN	468	460	####		####	####	FYWGHKEILIPVFK	5	P53396	ACLY_HUMAN	546	540	####		####	####	####	Intra	1	1	7	26405	5
AQKLLVGVDEK	2	P53396	ACLY_HUMAN	151	148	5TE1	Structure	151:B	13749	LLQDHPWLLSQNLVVKPDQLIKR	21	P53396	ACLY_HUMAN	64	42	5TE1	Structure	64:B	12541	22.37	Intra	3	1	7	26940	5
FKYAR	1	P53396	ACLY_HUMAN	30	28	5TE1	Structure	30:B	11968	ELLYKFICTTSAIQNR	4	P53396	ACLY_HUMAN	17	12	5TE1	Structure	17:B	11749	12.46	Intra	1	1	7	25825	4
LGQEATVGKATGFLK	8	P53396	ACLY_HUMAN	97	88	5TE1	Structure	97:B	13066	LLQDHPWLLSQNLVVKPDQLIKR	21	P53396	ACLY_HUMAN	64	42	5TE1	Structure	64:B	12541	12.99	Intra	6	1	7	27636	4
LKQGLYR	1	P53396	ACLY_HUMAN	1080	1078	####		####	####	EGKLIMGIGHR	2	P53396	ACLY_HUMAN	968	965	####		####	####	####	Intra	1	1	7	17519	5
LKQGLYR	1	P53396	ACLY_HUMAN	1080	1078	####		####	####	FYWGHKEILIPVFK	5	P53396	ACLY_HUMAN	546	540	####		####	####	####	Intra	2	1	7	26578	5
VKSINNPDMR	1	P53396	ACLY_HUMAN	978	976	####		####	####	FYWGHKEILIPVFK	5	P53396	ACLY_HUMAN	546	540	####		####	####	####	Intra	2	1	7	27017	5
LVGGTTPGKGGQTHLGLPVFNTVK	8	P53597	SUCA_HUMAN	90	81	P53597	Phyre	90:A	369	IICQGFTGKQGTFHSQQALEYGTK	8	P53597	SUCA_HUMAN	66	57	P53597	Phyre	66:A	193	15.97	Intra	1	1	1	21956	6
VLTIDPTEFKFK	9	P53621	COPA_HUMAN	598	588	P53621	Phyre	598:A	4815	NAKLVGQSIIAYLQK	2	P53621	COPA_HUMAN	619	616	P53621	Phyre	619:A	4994	10.38	Intra	4	1	2	34218	4
VWNYKLR	4	P53621	COPA_HUMAN	81	76	P53621	Phyre	81:A	670	KNLSPGAVESDVR	0	P53621	COPA_HUMAN	170	169	P53621	Phyre	170:A	1412	37.5	Intra	3	1	2	18703	4
KVVVYLQK	0	P53634	CATC_HUMAN	63	62	3PDF	Structure	39:A	286	NWACFTGKK	7	P53634	CATC_HUMAN	140	132	3PDF	Structure	116:A	914	10.88	Intra	5	1	1	19604	4
NFKIIYR	2	P53680	AP2S1_HUMAN	56	53	P53680	Phyre	56:A	474	DAKHTNFVEFR	2	P53680	AP2S1_HUMAN	45	42	P53680	Phyre	45:A	372	18.29	Intra	1	1	1	20900	5
DDNMFQIGKMR	8	P53999	TCP4_HUMAN	68	59	1PCF	Structure	68:C	1139	KGISLNPEQWSQLK	0	P53999	TCP4_HUMAN	101	100	1PCF	Structure	101:C	1420	13.92	Intra	1	0.95	1	29103	4
SSKISR	2	P54578	UBP14_HUMAN	316	313	2AYN	Structure	315:A	1525	YLFTGLKLR	6	P54578	UBP14_HUMAN	291	284	2AYN	Structure	290:A	1319	9.48	Intra	4	1	3	21850	4
VLKDVK	2	P54578	UBP14_HUMAN	345	342	2AYN	Structure	344:C	7213	FFYKEK	3	P54578	UBP14_HUMAN	334	330	2AYN	Structure	333:C	7127	17.56	Intra	3	1	3	15371	4
YLFTGLKLR	6	P54578	UBP14_HUMAN	291	284	P54578	Phyre	291:A	1303	KVNQQPNTSDKK	0	P54578	UBP14_HUMAN	381	380	####		####	####	####	Intra	1	0.91	3	18794	5
LQNSKTTK	4	P55060	XPO2_HUMAN	782	777	P55060	Modeller	782:A	6298	KQIFILLFQR	0	P55060	XPO2_HUMAN	768	767	P55060	Modeller	768:A	6175	23.7	Intra	3	1	1	26655	4
KYEMFAQTLQQSR	0	P55072	TERA_HUMAN	754	753	5C1B	Structure	754:F	68288	KYEMFAQTLQQSR	0	P55072	TERA_HUMAN	754	753	5C1B	Structure	754:A	11150	23.93	1	7	1	3	24606	4
KYEM[147.04]FAQTLQQSR	0	P55072	TERA_HUMAN	754	753	5C1B	Structure	754:F	68288	KYEMFAQTLQQSR	0	P55072	TERA_HUMAN	754	753	5C1B	Structure	754:A	11150	23.93	1	3	1	3	22449	4
VAILKANLR	4	P55072	TERA_HUMAN	658	653	5C1B	Structure	658:B	21350	FLKFGMTPSK	2	P55072	TERA_HUMAN	505	502	5C1B	Structure	505:B	19074	42.03	Intra	1	1	3	24226	4
NLQVKCAQIEAK	4	P55209	NP1L1_HUMAN	87	82	P55209	Phyre	87:A	283	KYAVLYQPLFDK	0	P55209	NP1L1_HUMAN	105	104	P55209	Phyre	105:A	437	27.76	Intra	3	1	4	24939	4
NLQVKCAQIEAK	4	P55209	NP1L1_HUMAN	87	82	P55209	Phyre	87:A	283	KYAVLYQPLFDKR	0	P55209	NP1L1_HUMAN	105	104	P55209	Phyre	105:A	437	27.76	Intra	5	1	4	21744	4
NLQVKCAQIEAK	4	P55209	NP1L1_HUMAN	87	82	P55209	Phyre	87:A	283	KYAVLYQPLFDKR	11	P55209	NP1L1_HUMAN	116	104	P55209	Phyre	116:A	533	44.94	Intra	5	1	4	21517	5
NLQVKCAQIEAK	4	P55209	NP1L1_HUMAN	87	82	P55209	Phyre	87:A	283	YAVLYQPLFDKR	10	P55209	NP1L1_HUMAN	116	105	P55209	Phyre	116:A	533	44.94	Intra	3	1	4	25062	4
KLCSFR	0	P55265	DSRAD_HUMAN	1167	1166	P55265	Phyre	1167:A	2427	KNIFLLFK	0	P55265	DSRAD_HUMAN	1159	1158	P55265	Phyre	1159:A	2355	12.45	Intra	1	1	2	27134	4
VSIYDSKR	6	P55265	DSRAD_HUMAN	1115	1108	####		####	####	KILAAIIMK	0	P55265	DSRAD_HUMAN	867	866	P55265	Phyre	867:A	344	####	Intra	4	1	2	23234	4
KAAWK	0	P55786	PSA_HUMAN	825	824	P55786	Modeller	825:A	6511	FIKDNWEELYNR	2	P55786	PSA_HUMAN	832	829	P55786	Modeller	832:A	6572	10.62	Intra	1	0.97	1	20881	4
AWKADR	2	P55809	SCOT1_HUMAN	214	211	3DLX	Structure	214:D	11759	AWKADR	2	P55809	SCOT1_HUMAN	214	211	3DLX	Structure	214:C	8278	25.48	1	3	1	1	12448	4
FKQIQR	1	P55884	EIF3B_HUMAN	366	364	2NLW	Structure	####	####	FKQIQR	1	P55884	EIF3B_HUMAN	366	364	2NLW	Structure	####	####	####	1	1	0.99	1	14583	4
WSPKGTYLATFHQR	3	P55884	EIF3B_HUMAN	345	341	2NLW	Structure	####	####	IKDMDLWEQQEEER	1	Q14152	EIF3A_HUMAN	720	718	####		####	####	####	1	2	1	1	22623	5
IKGSEADR	1	P56192	SYMC_HUMAN	729	727	5GL7	Structure	729:A	4084	HGNQYIQVNEPWKR	12	P56192	SYMC_HUMAN	726	713	5GL7	Structure	726:A	4056	5.78	Intra	4	1	1	14945	5
LSKVSFR	2	P58107	EPIPL_HUMAN	2707	2704	####		####	####	AATMEVKVGR	6	P58107	EPIPL_HUMAN	2525	2518	####		####	####	####	Intra	1	1	4	17389	4
LSKVSFR	2	P58107	EPIPL_HUMAN	2707	2704	####		####	####	LSKVSFR	2	P58107	EPIPL_HUMAN	2707	2704	####		####	####	####	N/A	5	1	4	18485	4
WVQETKLLAQAR	5	P58107	EPIPL_HUMAN	1187	1181	####		####	####	SLQAVPGAKDGTSLWDLLSSCHFTEEQR	8	P58107	EPIPL_HUMAN	1139	1130	####		####	####	####	Intra	1	1	4	31338	5
WVQETKLLAQAR	5	P58107	EPIPL_HUMAN	1187	1181	####		####	####	SLQAVPGAKDGTSLWDLLSSCHFTEEQRR	8	P58107	EPIPL_HUMAN	1139	1130	####		####	####	####	Intra	1	0.94	4	29799	5
EAGITEKVVFEQTK	6	P60174	TPIS_HUMAN	179	172	4POC	Structure	141:B	5815	GWLKSNVSDAVAQSTR	3	P60174	TPIS_HUMAN	231	227	4POC	Structure	193:B	6657	16.37	Intra	1	1	4	24025	4
GWLKSNVSDAVAQSTR	3	P60174	TPIS_HUMAN	231	227	4POC	Structure	193:B	6657	TATPQQAQEVHEKLR	12	P60174	TPIS_HUMAN	225	212	4POC	Structure	187:B	6542	9.7	Intra	4	1	4	17725	5
KFFVGGNWK	0	P60174	TPIS_HUMAN	43	42	4POC	Structure	5:A	36	VIADNVKDWSK	6	P60174	TPIS_HUMAN	193	186	4POC	Structure	155:A	2304	20.45	Intra	3	1	4	22232	4
QKLDPK	1	P60174	TPIS_HUMAN	92	90	4POC	Structure	54:B	4524	QKLDPK	1	P60174	TPIS_HUMAN	92	90	4POC	Structure	54:A	784	18.91	1	2	1	4	10666	4
KNASCGTR	0	P60468	SC61B_HUMAN	35	34	####		####	####	SPSKAVAAR	3	P60468	SC61B_HUMAN	20	16	####		####	####	####	Intra	4	1	1	7244	4
ALGQNPTNAEVLKVLGNPK	12	P60660	MYL6_HUMAN	50	37	P60660	Phyre	50:A	363	VLDFEHFLPMLQTVAKNK	15	P60660	MYL6_HUMAN	79	63	P60660	Phyre	79:A	593	14.15	Intra	1	1	2	35876	5
TGDGKILYSQCGDVMR	4	P60660	MYL6_HUMAN	26	21	P60660	Phyre	26:A	182	SDEMNVKVLDFEHFLPMLQTVAK	6	P60660	MYL6_HUMAN	63	56	P60660	Phyre	63:A	461	9.07	Intra	2	1	2	37285	5
HQGVMVGMGQKDSYVGDEAQSK	10	P60709	ACTB_HUMAN	50	39	6ANU	Structure	50:A	3275	YPIEHGIVTNWDDM[147.04]EKIWHHTFYNELR	15	P60709	ACTB_HUMAN	84	68	6ANU	Structure	84:A	3549	12.79	Intra	1	1	2	27214	5
HQGVMVGM[147.04]GQKDSYVGDEAQSK	10	P60709	ACTB_HUMAN	50	39	6ANU	Structure	50:A	3275	YPIEHGIVTNWDDM[147.04]EKIWHHTFYNELR	15	P60709	ACTB_HUMAN	84	68	6ANU	Structure	84:A	3549	12.79	Intra	1	1	2	27084	6
VAPEEHPVLLTEAPLNPKANR	17	P60709	ACTB_HUMAN	113	95	P60709_P68032	Docking	113:A	3794	GILTLKYPIEHGIITNWDDMEK	5	P68032	ACTC_HUMAN	70	64	P60709_P68032	Docking	70:B	490	42.54	1	4	1	1	29708	5
AEVQKLQMEAPHIIVGTPGR	4	P60842	IF4A1_HUMAN	146	141	3EIQ	Structure	146:A	942	ELAQQIQKVVMALGDYMGASCHACIGGTNVR	7	P60842	IF4A1_HUMAN	118	110	3EIQ	Structure	118:A	745	17.79	Intra	1	1	2	38850	5
YLSPKYIK	4	P60842	IF4A1_HUMAN	174	169	3EIQ	Structure	174:A	1168	AEVQKLQMEAPHIIVGTPGR	4	P60842	IF4A1_HUMAN	146	141	3EIQ	Structure	146:A	942	17.36	Intra	3	1	2	22353	5
GDNPKLLLK	4	P61009	SPCS3_HUMAN	117	112	####		####	####	NNALNQVVLWDKIVLR	11	P61009	SPCS3_HUMAN	108	96	####		####	####	####	Intra	3	1	1	33694	4
GKGEQIAR	1	P61026	RAB10_HUMAN	136	134	5SZJ	Structure	136:A	1061	SFENISKWLR	6	P61026	RAB10_HUMAN	102	95	5SZJ	Structure	102:A	792	16.36	Intra	4	1	1	22206	4
IIKETQR	2	P61088	UBE2N_HUMAN	10	7	4ONL	Structure	10:B	1218	DKWSPALQIR	1	P61088	UBE2N_HUMAN	94	92	4ONL	Structure	94:B	1892	22.99	Intra	3	1	1	19390	4
DKDNFWMTR	1	P61160	ARP2_HUMAN	368	366	P61160	Phyre	368:A	2839	SEFYKHIVLSGGSTMYPGLPSR	4	P61160	ARP2_HUMAN	299	294	P61160	Phyre	299:A	2285	33.16	Intra	1	1	2	26263	4
ILLTEPPMNPTKNR	11	P61160	ARP2_HUMAN	118	106	P61160	Phyre	118:A	845	NWDDMKHLWDYTFGPEK	5	P61160	ARP2_HUMAN	86	80	P61160	Phyre	86:A	580	16.65	Intra	1	1	2	30724	5
KVVVCDNGTGFVK	0	P61160	ARP2_HUMAN	7	6	P61160	Phyre	7:A	26	DGVWKPTLVILR	4	Q92747	ARC1A_HUMAN	87	82	Q92747	Phyre	87:A	699	####	1	3	1	1	29318	4
ALKQMIK	2	P61201	CSN2_HUMAN	73	70	4D10	Structure	73:B	3696	INFKLTNFPEMMNR	3	P61201	CSN2_HUMAN	81	77	4D10	Structure	81:B	3766	12.58	Intra	3	1	3	26523	4
ALKQMIK	2	P61201	CSN2_HUMAN	73	70	4D10	Structure	73:B	3696	LWFKTNTK	3	P61201	CSN2_HUMAN	150	146	4D10	Structure	150:B	4350	20.74	Intra	3	1	3	20511	4
LGKLYLER	2	P61201	CSN2_HUMAN	157	154	4D10	Structure	157:J	25120	LWFKTNTK	3	P61201	CSN2_HUMAN	150	146	4D10	Structure	150:J	25068	10.48	Intra	6	1	3	22571	4
ATGDETGAKVER	8	P61247	RS3A_HUMAN	249	240	####		####	####	DWYDVKAPAMFNIR	5	P61247	RS3A_HUMAN	34	28	P61247	Phyre	34:A	115	####	Intra	1	1	22	26273	4
ATGDETGAKVER	8	P61247	RS3A_HUMAN	249	240	####		####	####	KDWYDVKAPAMFNIR	6	P61247	RS3A_HUMAN	34	27	P61247	Phyre	34:A	115	####	Intra	4	1	22	21848	5
DWYDVKAPAMFNIR	5	P61247	RS3A_HUMAN	34	28	P61247	Phyre	34:A	115	LITEDVQGKNCLTNFHGMDLTR	8	P61247	RS3A_HUMAN	94	85	P61247	Phyre	94:A	581	10.19	Intra	3	1	22	29369	4
DWYDVKAPAMFNIR	5	P61247	RS3A_HUMAN	34	28	P61247	Phyre	34:A	115	LMELHGEGSSSGKATGDETGAK	12	P61247	RS3A_HUMAN	240	227	####		####	####	####	Intra	6	1	22	24390	5
DWYDVKAPAMFNIR	5	P61247	RS3A_HUMAN	34	28	P61247	Phyre	34:A	115	LM[147.04]ELHGEGSSSGKATGDETGAK	12	P61247	RS3A_HUMAN	240	227	####		####	####	####	Intra	4	1	22	23370	5
DWYDVKAPAM[147.04]FNIR	5	P61247	RS3A_HUMAN	34	28	P61247	Phyre	34:A	115	LM[147.04]ELHGEGSSSGKATGDETGAK	12	P61247	RS3A_HUMAN	240	227	####		####	####	####	Intra	1	1	22	20545	5
EVQTNDLKEVVNK	7	P61247	RS3A_HUMAN	182	174	P61247	Phyre	182:A	1312	DWYDVKAPAMFNIR	5	P61247	RS3A_HUMAN	34	28	P61247	Phyre	34:A	115	15.62	Intra	1	1	22	28608	4
EVQTNDLKEVVNK	7	P61247	RS3A_HUMAN	182	174	P61247	Phyre	182:A	1312	KDWYDVKAPAMFNIR	6	P61247	RS3A_HUMAN	34	27	P61247	Phyre	34:A	115	15.62	Intra	1	1	22	24281	5
IASDGLKGR	6	P61247	RS3A_HUMAN	63	56	P61247	Phyre	63:A	331	NIGKTLVTR	3	P61247	RS3A_HUMAN	46	42	P61247	Phyre	46:A	207	13.9	Intra	1	1	22	15763	4
KDWYDVK	0	P61247	RS3A_HUMAN	28	27	P61247	Phyre	28:A	57	NIGKTLVTR	3	P61247	RS3A_HUMAN	46	42	P61247	Phyre	46:A	207	12.35	Intra	3	1	22	18433	4
KDWYDVKAPAMFNIR	6	P61247	RS3A_HUMAN	34	27	P61247	Phyre	34:A	115	LITEDVQGKNCLTNFHGMDLTR	8	P61247	RS3A_HUMAN	94	85	P61247	Phyre	94:A	581	10.19	Intra	2	1	22	26564	6
KDWYDVKAPAMFNIR	6	P61247	RS3A_HUMAN	34	27	P61247	Phyre	34:A	115	LMELHGEGSSSGKATGDETGAK	12	P61247	RS3A_HUMAN	240	227	####		####	####	####	Intra	3	1	22	21439	6
KDWYDVKAPAM[147.04]FNIR	6	P61247	RS3A_HUMAN	34	27	P61247	Phyre	34:A	115	LMELHGEGSSSGKATGDETGAK	12	P61247	RS3A_HUMAN	240	227	####		####	####	####	Intra	1	1	22	19022	6
LFCVGFTKK	7	P61247	RS3A_HUMAN	144	136	P61247	Phyre	144:A	984	KTSYAQHQQVR	0	P61247	RS3A_HUMAN	152	151	P61247	Phyre	152:A	1057	11.06	Intra	7	1	22	16016	4
NIGKTLVTR	3	P61247	RS3A_HUMAN	46	42	P61247	Phyre	46:A	207	DWYDVKAPAMFNIR	5	P61247	RS3A_HUMAN	34	28	P61247	Phyre	34:A	115	9.14	Intra	4	1	22	28903	4
NIGKTLVTR	3	P61247	RS3A_HUMAN	46	42	P61247	Phyre	46:A	207	FKLITEDVQGK	1	P61247	RS3A_HUMAN	85	83	P61247	Phyre	85:A	512	15.41	Intra	2	1	22	20746	4
NIGKTLVTR	3	P61247	RS3A_HUMAN	46	42	P61247	Phyre	46:A	207	KDWYDVKAPAMFNIR	6	P61247	RS3A_HUMAN	34	27	P61247	Phyre	34:A	115	9.14	Intra	6	1	22	24051	4
NIGKTLVTR	3	P61247	RS3A_HUMAN	46	42	P61247	Phyre	46:A	207	KDWYDVKAPAM[147.04]FNIR	6	P61247	RS3A_HUMAN	34	27	P61247	Phyre	34:A	115	9.14	Intra	3	1	22	21520	5
NIGKTLVTR	3	P61247	RS3A_HUMAN	46	42	P61247	Phyre	46:A	207	KTSYAQHQQVR	0	P61247	RS3A_HUMAN	152	151	P61247	Phyre	152:A	1057	51.11	Intra	5	1	22	11870	5
TQGTKIASDGLK	4	P61247	RS3A_HUMAN	56	51	P61247	Phyre	56:A	283	DWYDVKAPAMFNIR	5	P61247	RS3A_HUMAN	34	28	P61247	Phyre	34:A	115	22.98	Intra	2	1	22	27501	4
TQGTKIASDGLK	4	P61247	RS3A_HUMAN	56	51	P61247	Phyre	56:A	283	KDWYDVKAPAMFNIR	6	P61247	RS3A_HUMAN	34	27	P61247	Phyre	34:A	115	22.98	Intra	2	1	22	22954	5
VVDPFSKK	6	P61247	RS3A_HUMAN	27	20	P61247	Phyre	27:A	48	DWYDVKAPAMFNIR	5	P61247	RS3A_HUMAN	34	28	P61247	Phyre	34:A	115	22.89	Intra	3	1	22	29981	4
SGMKIGR	3	P62263	RS14_HUMAN	125	121	5T2C	Structure	####	####	DWYDVKAPAMFNIR	5	P61247	RS3A_HUMAN	34	28	5T2C	Structure	####	####	####	1	2	0.96	2	27860	4
TKTPGPGAQSALR	1	P62263	RS14_HUMAN	106	104	5T2C	Structure	####	####	KTSYAQHQQVR	0	P61247	RS3A_HUMAN	152	151	5T2C	Structure	####	####	####	1	4	1	2	9410	5
LKVDSFR	1	P61289	PSME3_HUMAN	14	12	P61289	Phyre	14:A	68	LLIEKCNTVK	4	P61289	PSME3_HUMAN	132	127	P61289	Phyre	132:A	756	23.21	Intra	4	1	1	19038	4
FMKPGK	2	P61353	RL27_HUMAN	6	3	P61353	Phyre	6:A	34	NKWFFQK	1	P61353	RL27_HUMAN	128	126	P61353	Phyre	128:A	1015	19.84	Intra	3	1	8	19767	4
FM[147.04]KPGK	2	P61353	RL27_HUMAN	6	3	P61353	Phyre	6:A	34	NKWFFQK	1	P61353	RL27_HUMAN	128	126	P61353	Phyre	128:A	1015	19.84	Intra	3	1	8	18719	4
KVTAAMGK	0	P61353	RL27_HUMAN	52	51	P61353	Phyre	52:A	387	NKWFFQK	1	P61353	RL27_HUMAN	128	126	P61353	Phyre	128:A	1015	12.26	Intra	10	1	8	18893	4
KVTAAMGK	0	P61353	RL27_HUMAN	52	51	P61353	Phyre	52:A	387	WFFQKLR	4	P61353	RL27_HUMAN	133	128	P61353	Phyre	133:A	1069	10.23	Intra	5	1	8	21970	4
KVTAAM[147.04]GK	0	P61353	RL27_HUMAN	52	51	P61353	Phyre	52:A	387	NKWFFQK	1	P61353	RL27_HUMAN	128	126	P61353	Phyre	128:A	1015	12.26	Intra	10	1	8	17613	4
VTAAMGKK	6	P61353	RL27_HUMAN	59	52	P61353	Phyre	59:A	432	NKWFFQK	1	P61353	RL27_HUMAN	128	126	P61353	Phyre	128:A	1015	22.17	Intra	2	1	8	18531	4
VTAAM[147.04]GKK	6	P61353	RL27_HUMAN	59	52	P61353	Phyre	59:A	432	NKWFFQK	1	P61353	RL27_HUMAN	128	126	P61353	Phyre	128:A	1015	22.17	Intra	3	1	8	17296	4
YKTGK	1	P61353	RL27_HUMAN	123	121	P61353	Phyre	123:A	978	NKWFFQK	1	P61353	RL27_HUMAN	128	126	P61353	Phyre	128:A	1015	9.54	Intra	1	1	8	17653	4
FMKPGK	2	P61353	RL27_HUMAN	6	3	P61353_P62888	Docking	6:A	25566	AKLVILANNCPALR	1	P62888	RL30_HUMAN	44	42	P61353_P62888	Docking	44:B	280	14.19	1	6	1	3	21714	4
NKWFFQK	1	P61353	RL27_HUMAN	128	126	P61353_P62888	Docking	128:A	26547	KSEIEYYAMLAKTGVHHYSGNNIELGTACGK	11	P62888	RL30_HUMAN	68	56	P61353_P62888	Docking	68:B	469	12.8	1	1	0.9	3	24125	5
NKWFFQK	1	P61353	RL27_HUMAN	128	126	P61353_P62888	Docking	128:A	26547	SEIEYYAMLAKTGVHHYSGNNIELGTACGK	10	P62888	RL30_HUMAN	68	57	P61353_P62888	Docking	68:B	469	12.8	1	1	0.79	3	26119	5
GKGGEIQPVSVK	1	P61604	CH10_HUMAN	56	54	4PJ1	Structure	2 days, 8:02:00	65207	GKGGEIQPVSVK	1	P61604	CH10_HUMAN	56	54	4PJ1	Structure	2 days, 8:01:00	64450	7.56	1	4	1	1	16207	4
GTSSFGKR	6	P61927	RL37_HUMAN	10	3	####		####	####	NKTHTLCR	1	P61927	RL37_HUMAN	14	12	####		####	####	####	Intra	1	1	4	8888	5
HLKIVYR	2	P61927	RL37_HUMAN	68	65	####		####	####	EGTTPKPKR	7	P61927	RL37_HUMAN	87	79	####		####	####	####	Intra	2	1	4	10635	5
HLKIVYR	2	P61927	RL37_HUMAN	68	65	####		####	####	YNWSAKAK	5	P61927	RL37_HUMAN	52	46	####		####	####	####	Intra	7	1	4	15108	4
KYNWSAK	0	P61927	RL37_HUMAN	46	45	####		####	####	HLKIVYR	2	P61927	RL37_HUMAN	68	65	####		####	####	####	Intra	7	1	4	14873	5
IILDLISESPIKGR	11	P61978	HNRPK_HUMAN	219	207	P61978	Phyre	219:A	1014	LLIHQSLAGGIIGVKGAK	14	P61978	HNRPK_HUMAN	163	148	####		####	####	####	Intra	21	1	4	29169	6
IILDLISESPIKGR	11	P61978	HNRPK_HUMAN	219	207	P61978	Phyre	219:A	1014	RPAEDMEEEQAFKR	12	P61978	HNRPK_HUMAN	34	21	####		####	####	####	Intra	2	1	4	24170	5
LLIHQSLAGGIIGVKGAK	14	P61978	HNRPK_HUMAN	163	148	####		####	####	ENTQTTIKLFQECCPHSTDR	7	P61978	HNRPK_HUMAN	179	171	P61978	Phyre	179:A	754	####	Intra	13	1	4	22272	4
NIKALR	2	P61978	HNRPK_HUMAN	66	63	P61978	Phyre	66:A	193	NAGAVIGKGGK	7	P61978	HNRPK_HUMAN	60	52	P61978	Phyre	60:A	151	8.33	Intra	1	1	4	14067	4
NLLSVAYKNVVGAR	7	P61981	1433G_HUMAN	50	42	3UZD	Structure	50:A	386	VISSIEQKTSADGNEK	7	P61981	1433G_HUMAN	69	61	3UZD	Structure	69:A	534	28.19	Intra	4	1	1	25467	4
FSGKHVVFIAQR	3	P62081	RS7_HUMAN	90	86	P62081	Phyre	90:A	689	ELNITAAKEIEVGGGR	7	P62081	RS7_HUMAN	49	41	P62081	Phyre	49:A	360	12.03	Intra	2	1	6	21829	5
FSGKHVVFIAQR	3	P62081	RS7_HUMAN	90	86	P62081	Phyre	90:A	689	ELNITAAKEIEVGGGRK	7	P62081	RS7_HUMAN	49	41	P62081	Phyre	49:A	360	12.03	Intra	4	1	6	20060	5
FSGKHVVFIAQR	3	P62081	RS7_HUMAN	90	86	P62081	Phyre	90:A	689	KAIIIFVPVPQLK	0	P62081	RS7_HUMAN	58	57	P62081	Phyre	58:A	425	5.6	Intra	1	1	6	28361	4
ILPKPTR	3	P62081	RS7_HUMAN	103	99	P62081	Phyre	103:A	800	FSGKHVVFIAQR	3	P62081	RS7_HUMAN	90	86	P62081	Phyre	90:A	689	37.36	Intra	4	1	6	17202	5
ILPKPTR	3	P62081	RS7_HUMAN	103	99	P62081	Phyre	103:A	800	SFQKIQVR	3	P62081	RS7_HUMAN	74	70	P62081	Phyre	74:A	554	34.2	Intra	3	1	6	17008	4
VKLDGSR	1	P62081	RS7_HUMAN	147	145	P62081	Phyre	147:A	1160	LIKVHLDK	2	P62081	RS7_HUMAN	155	152	P62081	Phyre	155:A	1222	12.33	Intra	8	1	6	14805	4
LIKVHLDK	2	P62081	RS7_HUMAN	155	152	5T2C	Structure	####	####	AGKIVVNLTGR	2	P62244	RS15A_HUMAN	60	57	5T2C	Structure	####	####	####	1	2	1	1	19621	5
GLCLKSR	4	P62136	PP1A_HUMAN	41	36	####		####	####	YNIKLWK	3	P62136	PP1A_HUMAN	147	143	####		####	####	####	Intra	6	1	2	20858	4
YNIKLWK	3	P62136	PP1A_HUMAN	147	143	4G9J	Structure	147:A	1133	IYGFYDECKR	8	P62136	PP1A_HUMAN	141	132	4G9J	Structure	141:A	1074	8.75	Intra	1	1	2	23024	4
FNIKLWK	3	P62140	PP1B_HUMAN	146	142	P62140	Phyre	146:A	1176	IYGFYDECKR	8	P62140	PP1B_HUMAN	140	131	P62140	Phyre	140:A	1118	8.42	Intra	3	1	3	25239	4
GLCIKSR	4	P62140	PP1B_HUMAN	40	35	P62140	Phyre	40:A	297	FNIKLWK	3	P62140	PP1B_HUMAN	146	142	P62140	Phyre	146:A	1176	16.72	Intra	1	1	3	22975	4
GLCIKSR	4	P62140	PP1B_HUMAN	40	35	P62140	Phyre	40:A	297	IKYPENFFLLR	1	P62140	PP1B_HUMAN	112	110	P62140	Phyre	112:A	879	10.4	Intra	3	1	3	27111	4
HTGGKILGFFF	4	P62244	RS15A_HUMAN	124	119	P62244	Phyre	124:A	973	DLEKWQNNLLPSR	3	P62244	RS15A_HUMAN	88	84	P62244	Phyre	88:A	685	14.55	Intra	6	1	5	35259	4
HTGGKILGFFF	4	P62244	RS15A_HUMAN	124	119	P62244	Phyre	124:A	973	FDVQLKDLEK	5	P62244	RS15A_HUMAN	84	78	P62244	Phyre	84:A	651	13.62	Intra	1	1	5	33383	4
HTGGKILGFFF	4	P62244	RS15A_HUMAN	124	119	P62244	Phyre	124:A	973	QVLIRPCSKVIVR	8	P62244	RS15A_HUMAN	32	23	P62244	Phyre	32:A	236	16.56	Intra	1	1	5	28683	5
KHTGGKILGFFF	5	P62244	RS15A_HUMAN	124	118	P62244	Phyre	124:A	973	DLEKWQNNLLPSR	3	P62244	RS15A_HUMAN	88	84	P62244	Phyre	88:A	685	14.55	Intra	2	1	5	31697	5
SINNAEKR	6	P62244	RS15A_HUMAN	19	12	P62244	Phyre	19:A	130	LNKCGVISPR	2	P62244	RS15A_HUMAN	71	68	P62244	Phyre	71:A	550	8.92	Intra	6	1	5	12959	4
KFGGPGAR	0	P62249	RS16_HUMAN	131	130	P62249	Phyre	131:A	980	YQKSYR	2	P62249	RS16_HUMAN	143	140	P62249	Phyre	143:A	1072	16.52	Intra	1	1	5	10823	4
TATAVAHCKR	8	P62249	RS16_HUMAN	26	17	P62249	Phyre	26:A	136	VKGGGHVAQIYAIR	1	P62249	RS16_HUMAN	73	71	P62249	Phyre	73:A	514	21.01	Intra	1	1	5	11879	5
VKGGGHVAQIYAIR	1	P62249	RS16_HUMAN	73	71	P62249	Phyre	73:A	514	QSISKALVAYYQK	4	P62249	RS16_HUMAN	90	85	P62249	Phyre	90:A	639	17.51	Intra	1	1	5	20317	5
VKGGGHVAQIYAIR	1	P62249	RS16_HUMAN	73	71	5T2C	Structure	####	####	VRVKGGGHVAQIYAIR	3	P62249	RS16_HUMAN	73	69	5T2C	Structure	####	####	####	N/A	1	1	5	31284	5
YQKSYR	2	P62249	RS16_HUMAN	143	140	P62249	Phyre	143:A	1072	VKGGGHVAQIYAIR	1	P62249	RS16_HUMAN	73	71	P62249	Phyre	73:A	514	42.11	Intra	3	1	5	13840	5
VFYYKMK	4	P62258	1433E_HUMAN	123	118	3UBW	Structure	123:A	1040	NLLSVAYKNVIGAR	7	P62258	1433E_HUMAN	50	42	3UBW	Structure	50:A	390	12.99	Intra	4	1	2	27402	4
VFYYKM[147.04]K	4	P62258	1433E_HUMAN	123	118	3UBW	Structure	123:A	1040	NLLSVAYKNVIGAR	7	P62258	1433E_HUMAN	50	42	3UBW	Structure	50:A	390	12.99	Intra	2	1	2	26090	4
NLLSVAYKNVVGAR	7	P63104	1433Z_HUMAN	49	41	P62258_P63104	Docking	49:B	377	NLLSVAYKNVIGAR	7	P62258	1433E_HUMAN	50	42	P62258_P63104	Docking	50:A	391	25.04	1	1	0.8	2	32772	4
VVSSIEQKTEGAEK	7	P63104	1433Z_HUMAN	68	60	P62258_P63104	Docking	68:B	528	NLLSVAYKNVIGAR	7	P62258	1433E_HUMAN	50	42	P62258_P63104	Docking	50:A	391	42.77	1	1	0.83	2	26170	4
SGMKIGR	3	P62263	RS14_HUMAN	125	121	####		####	####	TKTPGPGAQSALR	1	P62263	RS14_HUMAN	106	104	####		####	####	####	Intra	3	1	2	13445	4
TKTPGPGAQSALR	1	P62263	RS14_HUMAN	106	104	####		####	####	ELGITALHIKLR	9	P62263	RS14_HUMAN	96	86	####		####	####	####	Intra	1	1	2	21677	5
KADIDLTK	0	P62269	RS18_HUMAN	47	46	####		####	####	QYKIPDWFLNR	2	P62269	RS18_HUMAN	78	75	####		####	####	####	Intra	1	1	3	27334	4
KADIDLTKR	0	P62269	RS18_HUMAN	47	46	####		####	####	QYKIPDWFLNR	2	P62269	RS18_HUMAN	78	75	####		####	####	####	Intra	3	1	3	24242	4
TVGVSKK	5	P62269	RS18_HUMAN	150	144	####		####	####	QYKIPDWFLNR	2	P62269	RS18_HUMAN	78	75	####		####	####	####	Intra	1	1	3	24045	4
KFGQGSR	0	P62273	RS29_HUMAN	13	12	P62273	Phyre	13:A	110	KYGLNMCR	0	P62273	RS29_HUMAN	33	32	P62273	Phyre	33:A	266	16.14	Intra	2	1	2	14589	4
KFGQGSR	0	P62273	RS29_HUMAN	13	12	P62273	Phyre	13:A	110	KYGLNM[147.04]CR	0	P62273	RS29_HUMAN	33	32	P62273	Phyre	33:A	266	16.14	Intra	1	0.78	2	12304	4
FVTGNKILR	5	P62277	RS13_HUMAN	70	64	P62277	Phyre	70:A	527	SVPTWLKLTSDDVK	6	P62277	RS13_HUMAN	27	20	P62277	Phyre	27:A	196	19.44	Intra	1	1	4	27226	4
KAVAVR	0	P62277	RS13_HUMAN	94	93	P62277	Phyre	94:A	722	KHLER	0	P62277	RS13_HUMAN	100	99	P62277	Phyre	100:A	766	9.85	Intra	4	1	4	8355	4
KHLER	0	P62277	RS13_HUMAN	100	99	P62277	Phyre	100:A	766	FVTGNKILR	5	P62277	RS13_HUMAN	70	64	P62277	Phyre	70:A	527	34.82	Intra	2	1	4	13697	5
SVPTWLKLTSDDVK	6	P62277	RS13_HUMAN	27	20	P62277	Phyre	27:A	196	MHAPGKGLSQSALPYR	5	P62277	RS13_HUMAN	9	3	P62277	Phyre	9:A	51	40.03	Intra	2	1	4	23284	5
FVTGNKILR	5	P62277	RS13_HUMAN	70	64	5T2C	Structure	####	####	VELCSFSGYKIYPGHGR	9	P83731	RL24_HUMAN	12	2	5T2C	Structure	####	####	####	1	2	1	1	21446	5
FNVLKVTK	4	P62280	RS11_HUMAN	144	139	####		####	####	HKNMSVHLSPCFR	1	P62280	RS11_HUMAN	107	105	####		####	####	####	Intra	1	1	3	18796	5
FNVLKVTK	4	P62280	RS11_HUMAN	144	139	####		####	####	KCPFTGNVSIR	0	P62280	RS11_HUMAN	59	58	####		####	####	####	Intra	3	1	3	21234	4
FNVLKVTK	4	P62280	RS11_HUMAN	144	139	####		####	####	YYKNIGLGFK	2	P62280	RS11_HUMAN	38	35	####		####	####	####	Intra	4	1	3	23903	4
AILYKR	4	P62424	RL7A_HUMAN	72	67	P62424	Phyre	72:A	446	FVKWPR	2	P62424	RL7A_HUMAN	56	53	P62424	Phyre	56:A	293	23.63	Intra	9	1	10	19256	4
AILYKR	4	P62424	RL7A_HUMAN	72	67	P62424	Phyre	72:A	446	HWGGNVLGPKSVAR	9	P62424	RL7A_HUMAN	245	235	P62424	Phyre	245:A	1810	16.31	Intra	4	1	10	16997	5
AILYKR	4	P62424	RL7A_HUMAN	72	67	P62424	Phyre	72:A	446	MGVPYCIIKGK	8	P62424	RL7A_HUMAN	185	176	P62424	Phyre	185:A	1333	17.4	Intra	4	1	10	21230	4
AILYKR	4	P62424	RL7A_HUMAN	72	67	P62424	Phyre	72:A	446	NFGIGQDIQPKR	10	P62424	RL7A_HUMAN	48	37	P62424	Phyre	48:A	221	35.37	Intra	1	1	10	18875	4
FVKWPR	2	P62424	RL7A_HUMAN	56	53	P62424	Phyre	56:A	293	HWGGNVLGPKSVAR	9	P62424	RL7A_HUMAN	245	235	P62424	Phyre	245:A	1810	19.75	Intra	7	1	10	19156	4
FVKWPR	2	P62424	RL7A_HUMAN	56	53	P62424	Phyre	56:A	293	LKVPPAINQFTQALDR	1	P62424	RL7A_HUMAN	75	73	P62424	Phyre	75:A	474	29.23	Intra	5	1	10	29851	4
FVKWPR	2	P62424	RL7A_HUMAN	56	53	P62424	Phyre	56:A	293	MGVPYCIIKGK	8	P62424	RL7A_HUMAN	185	176	P62424	Phyre	185:A	1333	30.41	Intra	1	1	10	23308	4
FVKWPR	2	P62424	RL7A_HUMAN	56	53	P62424	Phyre	56:A	293	NFGIGQDIQPKR	10	P62424	RL7A_HUMAN	48	37	P62424	Phyre	48:A	221	16.8	Intra	4	1	10	21033	4
HWGGNVLGPKSVAR	9	P62424	RL7A_HUMAN	245	235	P62424	Phyre	245:A	1810	LKVPPAINQFTQALDR	1	P62424	RL7A_HUMAN	75	73	P62424	Phyre	75:A	474	19.78	Intra	2	1	10	26507	4
IAKLEK	2	P62424	RL7A_HUMAN	252	249	P62424	Phyre	252:A	1861	HWGGNVLGPKSVAR	9	P62424	RL7A_HUMAN	245	235	P62424	Phyre	245:A	1810	10.68	Intra	1	1	10	15667	5
AMELLKVSK	5	Q9Y3U8	RL36_HUMAN	62	56	5T2C	Structure	####	####	LKVPPAINQFTQALDR	1	P62424	RL7A_HUMAN	75	73	5T2C	Structure	####	####	####	1	5	1	1	31251	4
FIQEKK	4	P62495	ERF1_HUMAN	284	279	1DT9	Structure	284:A	2170	SQEGSQFVKGFGGIGGILR	8	P62495	ERF1_HUMAN	404	395	1DT9	Structure	404:A	2988	15.34	Intra	2	1	2	24710	4
LIKSLEAAR	2	P62495	ERF1_HUMAN	22	19	1DT9	Structure	22:A	141	SQEGSQFVKGFGGIGGILR	8	P62495	ERF1_HUMAN	404	395	1DT9	Structure	404:A	2988	25.75	Intra	1	1	2	28033	4
GNKPWISLPR	2	P62701	RS4X_HUMAN	233	230	P62701	Phyre	233:A	1834	HPGSFDVVHVKDANGNSFATR	10	P62701	RS4X_HUMAN	211	200	P62701	Phyre	211:A	1671	15.55	Intra	3	1	3	20628	5
IFVGTKGIPHLVTHDAR	5	P62701	RS4X_HUMAN	134	128	5T2C	Structure	####	####	IFVGTKGIPHLVTHDAR	5	P62701	RS4X_HUMAN	134	128	5T2C	Structure	####	####	####	1	1	1	3	18579	6
LIYDTKGR	5	P62701	RS4X_HUMAN	106	100	P62701	Phyre	106:A	843	GNKPWISLPR	2	P62701	RS4X_HUMAN	233	230	P62701	Phyre	233:A	1834	22.8	Intra	2	1	3	21477	4
KAYVR	0	P62750	RL23A_HUMAN	135	134	P62750	Phyre	135:A	798	KIEDNNTLVFIVDVK	0	P62750	RL23A_HUMAN	89	88	P62750	Phyre	89:A	428	13.27	Intra	1	0.91	1	25639	4
KAYVR	0	P62750	RL23A_HUMAN	135	134	P62750	Phyre	135:A	798	LGFKIR	3	Q8IWR0	Z3H7A_HUMAN	173	169	####		####	####	####	2	3	1	1	16773	4
RQEQIAKR	6	P62753	RS6_HUMAN	230	223	P62753	Phyre	230:A	1820	ASTSKSESSQK	4	P62753	RS6_HUMAN	243	238	P62753	Phyre	243:A	1925	19.35	Intra	3	1	3	5681	4
TFYEKR	4	P62753	RS6_HUMAN	30	25	P62753	Phyre	30:A	242	LLLSKGHSCYRPR	4	P62753	RS6_HUMAN	79	74	P62753	Phyre	79:A	618	28.76	Intra	1	1	3	13648	5
VLQHKR	4	P62753	RS6_HUMAN	188	183	P62753	Phyre	188:A	1499	TKAPKIQR	4	P62753	RS6_HUMAN	175	170	P62753	Phyre	175:A	1388	22.95	Intra	1	1	3	6622	5
DAVTYTEHAKR	9	P62805	H4_HUMAN	78	68	5B0Z	Structure	77:B	1207	KTVTAMDVVYALKR	0	P62805	H4_HUMAN	80	79	5B0Z	Structure	79:B	1227	6.76	Intra	1	1	1	20294	5
DAVTYTEHAKR	9	P62805	H4_HUMAN	78	68	5B0Z	Structure	77:B	1207	EIAQDFKTDLR	6	P68431	H31_HUMAN	80	73	5AV9	Structure	79:A	368	####	1	3	1	6	16883	4
DNIQGITKPAIR	7	P62805	H4_HUMAN	32	24	5B0Z	Structure	31:B	837	VTIMPKDIQLAR	5	P68431	H31_HUMAN	123	117	5AV9	Structure	122:A	700	####	1	2	1	6	24973	4
RGGVKR	4	P62805	H4_HUMAN	45	40	5B0Z	Structure	44:B	938	TKQTAR	1	P68431	H31_HUMAN	5	3	5AV9	Structure	####	####	####	1	1	0.8	6	4693	4
RGGVKR	4	P62805	H4_HUMAN	45	40	5B0Z	Structure	44:B	938	YQKSTELLIR	2	P68431	H31_HUMAN	57	54	5AV9	Structure	56:A	171	####	1	3	1	6	14063	4
VTIMPKDIQLAR	5	P68431	H31_HUMAN	123	117	5AV9	Structure	122:A	700	GVLKVFLENVIR	3	P62805	H4_HUMAN	60	56	5B0Z	Structure	59:B	1059	####	1	1	0.97	6	35666	4
YQKSTELLIR	2	P68431	H31_HUMAN	57	54	5AV9	Structure	56:A	171	TVTAMDVVYALKR	11	P62805	H4_HUMAN	92	80	5B0Z	Structure	91:B	1317	####	1	2	1	6	30700	4
AVTKYTSSK	3	Q16778	H2B2E_HUMAN	121	117	4NFT	Structure	89:A	697	DAVTYTEHAKR	9	P62805	H4_HUMAN	78	68	5B0Z	Structure	77:B	1207	####	1	1	1	2	10348	4
KESYSIYVYK	0	Q16778	H2B2E_HUMAN	35	34	4NFT	Structure	3:A	21	DAVTYTEHAKR	9	P62805	H4_HUMAN	78	68	5B0Z	Structure	77:B	1207	####	1	3	1	2	15646	4
KGNYAER	0	Q96KK5	H2A1H_HUMAN	37	36	P62805_Q96KK5	Docking	37:B	268	DAVTYTEHAKR	9	P62805	H4_HUMAN	78	68	P62805_Q96KK5	Docking	78:A	1216	16.16	1	13	1	2	9190	4
NDEELNKLLGK	6	Q96KK5	H2A1H_HUMAN	96	89	P62805_Q96KK5	Docking	96:B	726	TVTAMDVVYALKR	11	P62805	H4_HUMAN	92	80	P62805_Q96KK5	Docking	92:A	1326	11.27	1	1	0.83	2	31624	4
AKSIVFHR	1	P62826	RAN_HUMAN	134	132	5CIQ	Structure	134:A	1008	SNYNFEKPFLWLAR	6	P62826	RAN_HUMAN	159	152	5CIQ	Structure	159:A	1233	20.19	Intra	1	1	18	28311	4
AKSIVFHR	1	P62826	RAN_HUMAN	134	132	5CIQ	Structure	134:B	2622	VTYKNVPNWHR	3	P62826	RAN_HUMAN	99	95	5CIQ	Structure	99:B	2338	14.31	Intra	9	1	18	15283	6
GPIKFNVWDTAGQEK	3	P62826	RAN_HUMAN	60	56	5CIQ	Structure	60:B	2022	KYVATLGVEVHPLVFHTNR	0	P62826	RAN_HUMAN	38	37	5CIQ	Structure	38:B	1849	14.34	Intra	11	1	18	25166	5
KNLQYYDISAK	0	P62826	RAN_HUMAN	142	141	5CIQ	Structure	142:A	1079	SNYNFEKPFLWLAR	6	P62826	RAN_HUMAN	159	152	5CIQ	Structure	159:A	1233	18.77	Intra	2	1	18	30904	4
KNLQYYDISAK	0	P62826	RAN_HUMAN	142	141	5CIQ	Structure	142:B	2693	VTYKNVPNWHR	3	P62826	RAN_HUMAN	99	95	5CIQ	Structure	99:B	2338	15.08	Intra	3	1	18	17346	5
KYVATLGVEVHPLVFHTNR	0	P62826	RAN_HUMAN	38	37	5CIQ	Structure	38:B	1849	KYVATLGVEVHPLVFHTNR	0	P62826	RAN_HUMAN	38	37	5CIQ	Structure	38:A	227	24.08	1	1	1	18	23878	5
SNYNFEKPFLWLAR	6	P62826	RAN_HUMAN	159	152	5CIQ	Structure	159:A	1233	VCENIPIVLCGNKVDIKDR	12	P62826	RAN_HUMAN	123	110	5CIQ	Structure	123:A	918	15.08	Intra	1	1	18	31384	5
TTFVKR	4	P62826	RAN_HUMAN	28	23	5CIQ	Structure	28:A	140	KYVATLGVEVHPLVFHTNR	0	P62826	RAN_HUMAN	38	37	5CIQ	Structure	38:A	227	12.85	Intra	4	1	18	20358	4
TTFVKR	4	P62826	RAN_HUMAN	28	23	5CIQ	Structure	28:A	140	SNYNFEKPFLWLAR	6	P62826	RAN_HUMAN	159	152	5CIQ	Structure	159:A	1233	15.61	Intra	3	1	18	30032	4
TTFVKR	4	P62826	RAN_HUMAN	28	23	5CIQ	Structure	28:B	1762	VTYKNVPNWHR	3	P62826	RAN_HUMAN	99	95	5CIQ	Structure	99:B	2338	25.29	Intra	2	1	18	14539	5
VDIKDR	3	P62826	RAN_HUMAN	127	123	5CIQ	Structure	127:A	950	AKSIVFHR	1	P62826	RAN_HUMAN	134	132	5CIQ	Structure	134:A	1008	16.73	Intra	1	1	18	14101	5
VDIKDR	3	P62826	RAN_HUMAN	127	123	5CIQ	Structure	127:A	950	SNYNFEKPFLWLAR	6	P62826	RAN_HUMAN	159	152	5CIQ	Structure	159:A	1233	21.48	Intra	4	1	18	30369	4
VDIKDR	3	P62826	RAN_HUMAN	127	123	5CIQ	Structure	127:A	950	VTYKNVPNWHR	3	P62826	RAN_HUMAN	99	95	5CIQ	Structure	99:A	724	20.62	Intra	2	1	18	14633	5
VTYKNVPNWHR	3	P62826	RAN_HUMAN	99	95	5CIQ	Structure	99:A	724	FNVWDTAGQEKFGGLR	10	P62826	RAN_HUMAN	71	60	5CIQ	Structure	71:A	499	15.49	Intra	6	1	18	22598	4
VTYKNVPNWHR	3	P62826	RAN_HUMAN	99	95	5CIQ	Structure	99:B	2338	GPIKFNVWDTAGQEK	3	P62826	RAN_HUMAN	60	56	5CIQ	Structure	60:B	2022	30.9	Intra	1	1	18	21032	5
VTYKNVPNWHR	3	P62826	RAN_HUMAN	99	95	5CIQ	Structure	99:B	2338	KKNLQYYDISAK	0	P62826	RAN_HUMAN	141	140	5CIQ	Structure	141:B	2684	15.37	Intra	2	1	18	15357	5
VTYKNVPNWHR	3	P62826	RAN_HUMAN	99	95	5CIQ	Structure	99:B	2338	KKNLQYYDISAK	1	P62826	RAN_HUMAN	142	140	5CIQ	Structure	142:B	2693	15.08	Intra	2	1	18	15425	6
VTYKNVPNWHR	3	P62826	RAN_HUMAN	99	95	5CIQ	Structure	99:A	724	SNYNFEKPFLWLAR	6	P62826	RAN_HUMAN	159	152	5CIQ	Structure	159:A	1233	22.95	Intra	1	1	18	27648	5
KIVEEERLK	0	Q9NRL2	BAZ1A_HUMAN	354	353	5UIY	Structure	####	####	KYVATLGVEVHPLVFHTNR	0	P62826	RAN_HUMAN	38	37	5CIQ	Structure	38:A	227	####	1	3	0.94	1	22691	4
GGSSGAKFR	6	P62829	RL23_HUMAN	13	6	P62829	Phyre	13:A	7	VELCSFSGYKIYPGHGR	9	P83731	RL24_HUMAN	12	2	5T2C	Structure	####	####	####	1	2	0.99	1	18387	5
ATVPKTEIR	4	P62847	RS24_HUMAN	37	32	P62847	Phyre	37:A	270	THFGGGKTTGFGMIYDSLDYAK	6	P62847	RS24_HUMAN	68	61	P62847	Phyre	68:A	522	13.72	Intra	1	0.82	4	23352	5
KFMTNR	0	P62847	RS24_HUMAN	11	10	P62847	Phyre	11:A	60	THFGGGKTTGFGMIYDSLDYAK	6	P62847	RS24_HUMAN	68	61	P62847	Phyre	68:A	522	16.11	Intra	3	1	4	23372	5
KFMTNR	0	P62847	RS24_HUMAN	11	10	P62847	Phyre	11:A	60	THFGGGKTTGFGM[147.04]IYDSLDYAK	6	P62847	RS24_HUMAN	68	61	P62847	Phyre	68:A	522	16.11	Intra	2	1	4	21121	5
KFM[147.04]TNR	0	P62847	RS24_HUMAN	11	10	P62847	Phyre	11:A	60	THFGGGKTTGFGMIYDSLDYAK	6	P62847	RS24_HUMAN	68	61	P62847	Phyre	68:A	522	16.11	Intra	2	0.99	4	22484	4
NVKGPVR	2	P62857	RS28_HUMAN	47	44	P62857	Phyre	47:A	290	VQPIKLAR	4	P62857	RS28_HUMAN	10	5	P62857	Phyre	10:A	2	18.18	Intra	4	1	4	15282	4
NVKGPVR	2	P62857	RS28_HUMAN	47	44	P62857	Phyre	47:A	290	VTKVLGR	2	P62857	RS28_HUMAN	16	13	P62857	Phyre	16:A	49	14.94	Intra	4	1	4	13037	4
VTKVLGR	2	P62857	RS28_HUMAN	16	13	P62857	Phyre	16:A	49	VQPIKLAR	4	P62857	RS28_HUMAN	10	5	P62857	Phyre	10:A	2	18.27	Intra	1	1	4	17020	4
VTKVLGR	2	P62857	RS28_HUMAN	16	13	5T2C	Structure	####	####	VTKVLGR	2	P62857	RS28_HUMAN	16	13	5T2C	Structure	####	####	####	N/A	1	0.98	4	12980	4
AKLVILANNCPALR	1	P62888	RL30_HUMAN	44	42	3VI6	Structure	44:A	280	KSEIEYYAMLAKTGVHHYSGNNIELGTACGK	11	P62888	RL30_HUMAN	68	56	3VI6	Structure	68:A	469	9.23	Intra	4	1	5	24548	6
KSLESINSR	0	P62888	RL30_HUMAN	9	8	3VI6	Structure	9:A	2	AKLVILANNCPALR	1	P62888	RL30_HUMAN	44	42	3VI6	Structure	44:A	280	17.07	Intra	6	1	5	21554	4
LQLVMKSGK	5	P62888	RL30_HUMAN	23	17	3VI6	Structure	23:A	113	AKLVILANNCPALR	1	P62888	RL30_HUMAN	44	42	3VI6	Structure	44:A	280	16.93	Intra	5	1	5	24238	4
LQLVMKSGK	5	P62888	RL30_HUMAN	23	17	3VI6	Structure	23:A	113	KSLESINSR	0	P62888	RL30_HUMAN	9	8	3VI6	Structure	9:A	2	24.2	Intra	1	1	5	17644	4
SGKYVLGYK	2	P62888	RL30_HUMAN	26	23	3VI6	Structure	26:A	132	AKLVILANNCPALR	1	P62888	RL30_HUMAN	44	42	3VI6	Structure	44:A	280	10.24	Intra	5	1	5	24587	4
EYTINIHKR	7	P62899	RL31_HUMAN	31	23	5T2C	Structure	####	####	EYTINIHKR	7	P62899	RL31_HUMAN	31	23	5T2C	Structure	####	####	####	1	3	1	2	11800	5
KFAMK	0	P62899	RL31_HUMAN	51	50	P62899	Phyre	51:A	322	ALKEIR	2	P62899	RL31_HUMAN	47	44	P62899	Phyre	47:A	285	6.21	Intra	1	0.97	2	15069	4
AVDIPHMDIEALKK	12	P62906	RL10A_HUMAN	91	78	P62906	Phyre	91:A	704	KYDAFLASESLIKQIPR	12	P62906	RL10A_HUMAN	118	105	P62906	Phyre	118:A	915	10.97	Intra	1	1	6	28539	5
ILGPGLNKAGK	7	P62906	RL10A_HUMAN	130	122	P62906	Phyre	130:A	1006	KVLCLAVAVGHVK	0	P62906	RL10A_HUMAN	161	160	P62906	Phyre	161:A	1251	12.58	Intra	9	1	6	20996	4
ILGPGLNKAGK	7	P62906	RL10A_HUMAN	130	122	P62906	Phyre	130:A	1006	KYDAFLASESLIKQIPR	12	P62906	RL10A_HUMAN	118	105	P62906	Phyre	118:A	915	18.24	Intra	2	1	6	25801	5
KNWQNVR	0	P62906	RL10A_HUMAN	196	195	####		####	####	NYDPQKDKR	7	P62906	RL10A_HUMAN	47	39	P62906	Phyre	47:A	361	####	Intra	3	1	6	9847	5
STIKFQMK	3	P62906	RL10A_HUMAN	156	152	P62906	Phyre	156:A	1205	KVLCLAVAVGHVK	0	P62906	RL10A_HUMAN	161	160	P62906	Phyre	161:A	1251	15.53	Intra	2	1	6	21856	4
STIKFQMK	3	P62906	RL10A_HUMAN	156	152	P62906	Phyre	156:A	1205	KYDAFLASESLIKQIPR	12	P62906	RL10A_HUMAN	118	105	P62906	Phyre	118:A	915	22.8	Intra	3	1	6	26447	5
NEKIAVHCTVR	2	P62913	RL11_HUMAN	67	64	4XXB	Structure	####	####	NEKIAVHCTVR	2	P62913	RL11_HUMAN	67	64	4XXB	Structure	####	####	####	1	1	1	2	21559	4
RNEKIAVHCTVR	3	P62913	RL11_HUMAN	67	63	4XXB	Structure	67:A	430	VLEQLTGQTPVFSKAR	13	P62913	RL11_HUMAN	52	38	4XXB	Structure	52:A	300	4.33	Intra	1	1	2	17015	6
KGAGSVFR	0	P62917	RL8_HUMAN	10	9	P62917	Phyre	10:A	67	GAPLAKVVFR	5	P62917	RL8_HUMAN	60	54	P62917	Phyre	60:A	449	34.13	Intra	3	1	1	21745	4
ALSTGEKGFGYK	6	P62937	PPIA_HUMAN	44	37	4N1M	Structure	44:A	633	HNGTGGKSIYGEK	6	P62937	PPIA_HUMAN	76	69	4N1M	Structure	76:A	1057	11.63	Intra	10	1	11	13552	4
ALSTGEKGFGYK	6	P62937	PPIA_HUMAN	44	37	4N1M	Structure	44:A	633	HNGTGGKSIYGEKFEDENFILK	6	P62937	PPIA_HUMAN	76	69	4N1M	Structure	76:A	1057	11.63	Intra	9	1	11	19797	4
ALSTGEKGFGYK	6	P62937	PPIA_HUMAN	44	37	4N1M	Structure	44:A	633	VSFELFADKVPKTAENFR	11	P62937	PPIA_HUMAN	31	19	4N1M	Structure	31:A	464	14.96	Intra	3	1	11	24067	5
GFGYKGSCFHR	4	P62937	PPIA_HUMAN	49	44	4N1M	Structure	49:A	706	HNGTGGKSIYGEK	6	P62937	PPIA_HUMAN	76	69	4N1M	Structure	76:A	1057	14.07	Intra	3	1	11	12421	5
HVVFGKVK	5	P62937	PPIA_HUMAN	131	125	4N1M	Structure	131:A	1778	VSFELFADKVPK	8	P62937	PPIA_HUMAN	28	19	4N1M	Structure	28:A	421	12.92	Intra	10	1	11	23602	4
KITIADCGQLE	0	P62937	PPIA_HUMAN	155	154	4N1M	Structure	155:A	2125	GFGYKGSCFHR	4	P62937	PPIA_HUMAN	49	44	4N1M	Structure	49:A	706	14.54	Intra	2	1	11	19122	4
NGKTSK	2	P62937	PPIA_HUMAN	151	148	4N1M	Structure	151:A	2067	TEWLDGKHVVFGK	6	P62937	PPIA_HUMAN	125	118	4N1M	Structure	125:A	1696	23.57	Intra	26	1	11	17412	4
VPKTAENFR	2	P62937	PPIA_HUMAN	31	28	4N1M	Structure	####	####	VSFELFADKVPKTAENFR	11	P62937	PPIA_HUMAN	31	19	4N1M	Structure	####	####	####	1	1	1	11	27676	4
VSFELFADKVPK	8	P62937	PPIA_HUMAN	28	19	4N1M	Structure	28:A	421	FEDENFILKHTGPGILSMANAGPNTNGSQFFICTAK	8	P62937	PPIA_HUMAN	91	82	4N1M	Structure	91:A	1280	12.28	Intra	1	1	11	33862	4
VSFELFADKVPK	8	P62937	PPIA_HUMAN	28	19	4N1M	Structure	28:A	421	TEWLDGKHVVFGK	6	P62937	PPIA_HUMAN	125	118	4N1M	Structure	125:A	1696	16.59	Intra	6	1	11	27480	5
VSFELFADKVPK	8	P62937	PPIA_HUMAN	28	19	4N1M	Structure	28:A	421	VKEGMNIVEAMER	1	P62937	PPIA_HUMAN	133	131	4N1M	Structure	133:A	1822	17.02	Intra	3	1	11	30564	4
DTKGSK	2	Q9H307	PININ_HUMAN	676	673	####		####	####	TEWLDGKHVVFGK	6	P62937	PPIA_HUMAN	125	118	4N1M	Structure	125:A	1696	####	2	5	0.97	1	18576	4
TFPKR	3	P62942	FKB1A_HUMAN	18	14	3MDY	Structure	18:B	5210	FMLGKQEVIR	4	P62942	FKB1A_HUMAN	53	48	3MDY	Structure	53:B	5499	11.91	Intra	2	0.99	1	19670	4
LIFAGKQLEDGR	5	P62987	RL40_HUMAN	48	42	P62987	Phyre	48:A	384	TLSDYNIQKESTLHLVLR	8	P62987	RL40_HUMAN	63	54	P62987	Phyre	63:A	523	16.69	Intra	5	1	2	26168	5
MQIFVKTLTGK	5	P62987	RL40_HUMAN	6	0	P62987	Phyre	6:A	53	LIFAGKQLEDGR	5	P62987	RL40_HUMAN	48	42	P62987	Phyre	48:A	384	13.82	Intra	1	0.86	2	26019	4
KQQMAR	0	P63104	1433Z_HUMAN	75	74	1QJB	Structure	75:B	2403	AKLAEQAER	1	P63104	1433Z_HUMAN	11	9	1QJB	Structure	11:B	1909	41.06	Intra	1	1	9	9134	4
KQQMAR	0	P63104	1433Z_HUMAN	75	74	1QJB	Structure	75:B	2403	VVSSIEQKTEGAEK	7	P63104	1433Z_HUMAN	68	60	1QJB	Structure	68:B	2351	9.64	Intra	7	1	9	12125	4
NLLSVAYKNVVGAR	7	P63104	1433Z_HUMAN	49	41	1QJB	Structure	49:B	2204	NLLSVAYKNVVGAR	7	P63104	1433Z_HUMAN	49	41	1QJB	Structure	49:A	377	25.58	1	1	1	9	31818	4
NLLSVAYKNVVGAR	7	P63104	1433Z_HUMAN	49	41	1QJB	Structure	49:B	2204	VVSSIEQKTEGAEK	7	P63104	1433Z_HUMAN	68	60	1QJB	Structure	68:B	2351	28.06	Intra	4	1	9	25054	4
VFYLKMK	4	P63104	1433Z_HUMAN	120	115	1QJB	Structure	120:A	930	AKLAEQAER	1	P63104	1433Z_HUMAN	11	9	1QJB	Structure	11:A	82	22.79	Intra	2	1	9	18466	4
VFYLKMK	4	P63104	1433Z_HUMAN	120	115	1QJB	Structure	120:A	930	NLLSVAYKNVVGAR	7	P63104	1433Z_HUMAN	49	41	1QJB	Structure	49:A	377	12.79	Intra	13	1	9	27783	4
VFYLKM[147.04]K	4	P63104	1433Z_HUMAN	120	115	1QJB	Structure	120:A	930	AKLAEQAER	1	P63104	1433Z_HUMAN	11	9	1QJB	Structure	11:A	82	22.79	Intra	1	1	9	16091	4
VFYLKM[147.04]K	4	P63104	1433Z_HUMAN	120	115	1QJB	Structure	120:A	930	NLLSVAYKNVVGAR	7	P63104	1433Z_HUMAN	49	41	1QJB	Structure	49:A	377	12.79	Intra	6	1	9	26291	4
VVSSIEQKTEGAEK	7	P63104	1433Z_HUMAN	68	60	1QJB	Structure	68:B	2351	VVSSIEQKTEGAEK	7	P63104	1433Z_HUMAN	68	60	1QJB	Structure	68:A	528	50.19	1	1	0.99	9	25223	4
LWKISER	2	P63151	2ABA_HUMAN	123	120	3DW8	Structure	123:B	5431	WLPQKNAAQFLLSTNDK	4	P63151	2ABA_HUMAN	105	100	3DW8	Structure	105:B	5284	10.54	Intra	1	1	1	27172	4
FNGQFKTYAICGAIR	5	P63220	RS21_HUMAN	51	45	####		####	####	IIGAKDHASIQMNVAEVDK	4	P63220	RS21_HUMAN	27	22	####		####	####	####	Intra	3	1	3	22255	5
KCSASNR	0	P63220	RS21_HUMAN	16	15	####		####	####	FNGQFKTYAICGAIR	5	P63220	RS21_HUMAN	51	45	####		####	####	####	Intra	11	1	3	18497	4
LAKADGIVSK	2	P63220	RS21_HUMAN	74	71	####		####	####	FNGQFKTYAICGAIR	5	P63220	RS21_HUMAN	51	45	####		####	####	####	Intra	1	1	3	21328	4
KNGFVVLK	0	P63241	IF5A1_HUMAN	27	26	5DLQ	Structure	27:F	9660	GRPCKIVEMSTSK	4	P63241	IF5A1_HUMAN	39	34	5DLQ	Structure	39:F	9751	8.86	Intra	2	1	2	17380	5
KNGFVVLK	0	P63241	IF5A1_HUMAN	27	26	5DLQ	Structure	27:F	9660	GRPCKIVEM[147.04]STSK	4	P63241	IF5A1_HUMAN	39	34	5DLQ	Structure	39:F	9751	8.86	Intra	1	0.83	2	15358	5
VWNLANCKLK	7	P63244	RACK1_HUMAN	183	175	4AOW	Structure	183:A	1404	LWNTLGVCKYTVQDESHSEWVSCVR	8	P63244	RACK1_HUMAN	139	130	4AOW	Structure	139:A	1047	14.07	Intra	7	1	1	25411	5
KGTPWEGGLFK	0	P63279	UBC9_HUMAN	49	48	2GRR	Structure	49:A	377	KDHPFGFVAVPTK	0	P63279	UBC9_HUMAN	18	17	2GRR	Structure	18:A	139	23.78	Intra	3	1	1	24423	5
KNNPR	0	P67809	YBOX1_HUMAN	93	92	1H95	Structure	43:A	704	VIATKVLGTVK	4	P67809	YBOX1_HUMAN	58	53	1H95	Structure	8:A	124	16.55	Intra	2	1	4	16251	4
KNNPR	0	P67809	YBOX1_HUMAN	93	92	1H95	Structure	43:A	704	VLGTVKWFNVR	5	P67809	YBOX1_HUMAN	64	58	1H95	Structure	14:A	218	20.31	Intra	1	0.89	4	20859	4
KVIATK	0	P67809	YBOX1_HUMAN	53	52	1H95	Structure	3:A	43	VLGTVKWFNVR	5	P67809	YBOX1_HUMAN	64	58	1H95	Structure	14:A	218	24.32	Intra	7	1	4	22302	4
VLGTVKWFNVR	5	P67809	YBOX1_HUMAN	64	58	1H95	Structure	14:A	218	NDTKEDVFVHQTAIK	3	P67809	YBOX1_HUMAN	81	77	1H95	Structure	31:A	504	12.65	Intra	8	1	4	24058	5
TVAKLEK	3	P67936	TPM4_HUMAN	212	208	P67936	Phyre	212:A	1683	LKEAETR	1	P67936	TPM4_HUMAN	197	195	P67936	Phyre	197:A	1564	22.54	Intra	1	0.97	1	10887	4
DSYVGDEAQSKR	10	P68032	ACTC_HUMAN	63	52	P68032	Phyre	63:A	435	YPIEHGIITNWDDMEKIWHHTFYNELR	15	P68032	ACTC_HUMAN	86	70	P68032	Phyre	86:A	627	17.21	Intra	6	1	6	28884	6
HQGVMVGMGQKDSYVGDEAQSK	10	P68032	ACTC_HUMAN	52	41	P68032	Phyre	52:A	352	YPIEHGIITNWDDMEKIWHHTFYNELR	15	P68032	ACTC_HUMAN	86	70	P68032	Phyre	86:A	627	13.24	Intra	12	1	6	27642	6
HQGVMVGM[147.04]GQKDSYVGDEAQSK	10	P68032	ACTC_HUMAN	52	41	P68032	Phyre	52:A	352	YPIEHGIITNWDDMEKIWHHTFYNELR	15	P68032	ACTC_HUMAN	86	70	P68032	Phyre	86:A	627	13.24	Intra	3	1	6	27084	6
IKIIAPPER	1	P68032	ACTC_HUMAN	330	328	P68032	Phyre	330:A	2546	DSYVGDEAQSKR	10	P68032	ACTC_HUMAN	63	52	P68032	Phyre	63:A	435	44.76	Intra	2	1	6	18059	4
IKIIAPPER	1	P68032	ACTC_HUMAN	330	328	P68032	Phyre	330:A	2546	MQKEITALAPSTMK	2	P68032	ACTC_HUMAN	317	314	P68032	Phyre	317:A	2450	9.96	Intra	3	1	6	23398	4
IKIIAPPER	1	P68032	ACTC_HUMAN	330	328	P68032	Phyre	330:A	2546	M[147.04]QKEITALAPSTMK	2	P68032	ACTC_HUMAN	317	314	P68032	Phyre	317:A	2450	9.96	Intra	1	1	6	22445	4
IKIIAPPER	1	P68032	ACTC_HUMAN	330	328	P68032	Phyre	330:A	2546	FHKLQNVQIALDYLR	2	Q15149	PLEC_HUMAN	236	233	5J1I	Structure	####	####	####	1	8	1	2	26140	4
IKIIAPPERK	1	P68032	ACTC_HUMAN	330	328	P68032	Phyre	330:A	2546	FHKLQNVQIALDYLR	2	Q15149	PLEC_HUMAN	236	233	5J1I	Structure	####	####	####	1	2	1	2	24093	5
IKIIAPPER	1	P68032	ACTC_HUMAN	330	328	P68032	Phyre	330:A	2546	MAKYQAAVSK	2	Q9UHB6	LIMA1_HUMAN	273	270	2D8Y	Structure	####	####	####	1	3	1	1	17350	4
AAGAGKVTK	5	P68104	EF1A1_HUMAN	450	444	####		####	####	LPLQDVYKIGGIGTVPVGR	7	P68104	EF1A1_HUMAN	255	247	P68104	Phyre	255:A	1953	####	Intra	1	1	11	25684	4
EHALLAYTLGVKQLIVGVNK	11	P68104	EF1A1_HUMAN	146	134	P68104	Phyre	146:A	1101	KDGNASGTTLLEALDCILPPTRPTDKPLR	0	P68104	EF1A1_HUMAN	219	218	P68104	Phyre	219:A	1679	13.07	Intra	4	1	11	37551	6
EHALLAYTLGVKQLIVGVNK	11	P68104	EF1A1_HUMAN	146	134	P68104	Phyre	146:A	1101	KDGNASGTTLLEALDCILPPTRPTDKPLR	25	P68104	EF1A1_HUMAN	244	218	P68104	Phyre	244:A	1859	21.22	Intra	3	1	11	37210	6
GWKVTR	2	P68104	EF1A1_HUMAN	215	212	P68104	Phyre	215:A	1645	LPLQDVYKIGGIGTVPVGR	7	P68104	EF1A1_HUMAN	255	247	P68104	Phyre	255:A	1953	54.86	Intra	4	1	11	26380	4
KAAGAGK	0	P68104	EF1A1_HUMAN	444	443	P68104	Phyre	444:A	3359	VTKSAQK	2	P68104	EF1A1_HUMAN	453	450	####		####	####	####	Intra	1	1	11	5288	4
LKAER	1	P68104	EF1A1_HUMAN	64	62	P68104	Phyre	64:A	471	TIEKFEK	3	P68104	EF1A1_HUMAN	41	37	P68104	Phyre	41:A	283	13.24	Intra	1	1	11	12150	4
LPLQDVYKIGGIGTVPVGR	7	P68104	EF1A1_HUMAN	255	247	P68104	Phyre	255:A	1953	EHALLAYTLGVKQLIVGVNK	11	P68104	EF1A1_HUMAN	146	134	P68104	Phyre	146:A	1101	42.02	Intra	6	1	11	36374	4
LPLQDVYKIGGIGTVPVGR	7	P68104	EF1A1_HUMAN	255	247	P68104	Phyre	255:A	1953	KDGNASGTTLLEALDCILPPTRPTDKPLR	0	P68104	EF1A1_HUMAN	219	218	P68104	Phyre	219:A	1679	50.84	Intra	4	1	11	35887	6
LPLQDVYKIGGIGTVPVGR	7	P68104	EF1A1_HUMAN	255	247	P68104	Phyre	255:A	1953	KDGNASGTTLLEALDCILPPTRPTDKPLR	25	P68104	EF1A1_HUMAN	244	218	P68104	Phyre	244:A	1859	29.74	Intra	6	1	11	35575	5
SAQKAQK	3	P68104	EF1A1_HUMAN	457	453	####		####	####	AAGAGKVTK	5	P68104	EF1A1_HUMAN	450	444	####		####	####	####	Intra	3	1	11	6057	4
TIEKFEK	3	P68104	EF1A1_HUMAN	41	37	P68104	Phyre	41:A	283	THINIVVIGHVDSGKSTTTGHLIYK	14	P68104	EF1A1_HUMAN	20	5	P68104	Phyre	20:A	122	23.67	Intra	1	1	11	18155	5
SAQKAQKAK	6	P68104	EF1A1_HUMAN	460	453	####		####	####	KCWYHSIFACPILR	0	Q9H871	RMD5A_HUMAN	327	326	####		####	####	####	2	1	0.73	1	28327	4
INVYYNEATGGKYVPR	11	P68371	TBB4B_HUMAN	58	46	P68371	Modeller	58:A	447	SGPFGQIFRPDNFVFGQSGAGNNWAKGHYTEGAELVDSVLDVVR	25	P68371	TBB4B_HUMAN	103	77	P68371	Modeller	103:A	793	34.33	Intra	4	1	12	36982	6
KLAVNMVPFPR	0	P68371	TBB4B_HUMAN	252	251	P68371	Modeller	252:A	1933	EAESCDCLQGFQLTHSLGGGTGSGMGTLLISKIR	31	P68371	TBB4B_HUMAN	154	122	P68371	Modeller	154:A	1159	20.33	Intra	5	1	12	32508	5
KLAVNMVPFPR	0	P68371	TBB4B_HUMAN	252	251	P68371	Modeller	252:A	1933	KEAESCDCLQGFQLTHSLGGGTGSGMGTLLISK	0	P68371	TBB4B_HUMAN	122	121	P68371	Modeller	122:A	939	30.75	Intra	3	1	12	29533	5
KLAVNMVPFPR	0	P68371	TBB4B_HUMAN	252	251	P68371	Modeller	252:A	1933	KEAESCDCLQGFQLTHSLGGGTGSGMGTLLISKIR	32	P68371	TBB4B_HUMAN	154	121	P68371	Modeller	154:A	1159	20.33	Intra	2	1	12	30869	5
KLAVNMVPFPR	0	P68371	TBB4B_HUMAN	252	251	P68371	Modeller	252:A	1933	SGPFGQIFRPDNFVFGQSGAGNNWAKGHYTEGAELVDSVLDVVR	25	P68371	TBB4B_HUMAN	103	77	P68371	Modeller	103:A	793	33.83	Intra	1	1	12	39041	6
KLAVNMVPFPR	0	P68371	TBB4B_HUMAN	252	251	P68371	Modeller	252:A	1933	TLKLTTPTYGDLNHLVSATMSGVTTCLR	2	P68371	TBB4B_HUMAN	216	213	P68371	Modeller	216:A	1662	38.76	Intra	4	1	12	35178	5
KLAVNM[147.04]VPFPR	0	P68371	TBB4B_HUMAN	252	251	P68371	Modeller	252:A	1933	TLKLTTPTYGDLNHLVSATMSGVTTCLR	2	P68371	TBB4B_HUMAN	216	213	P68371	Modeller	216:A	1662	38.76	Intra	1	1	12	33439	5
MSMKEVDEQMLNVQNK	3	P68371	TBB4B_HUMAN	324	320	P68371	Modeller	324:A	2504	SGPFGQIFRPDNFVFGQSGAGNNWAKGHYTEGAELVDSVLDVVR	25	P68371	TBB4B_HUMAN	103	77	P68371	Modeller	103:A	793	39.24	Intra	3	1	12	37771	6
TLKLTTPTYGDLNHLVSATMSGVTTCLR	2	P68371	TBB4B_HUMAN	216	213	P68371	Modeller	216:A	1662	EAESCDCLQGFQLTHSLGGGTGSGMGTLLISKIR	31	P68371	TBB4B_HUMAN	154	122	P68371	Modeller	154:A	1159	38.2	Intra	2	1	12	36586	5
TLKLTTPTYGDLNHLVSATMSGVTTCLR	2	P68371	TBB4B_HUMAN	216	213	P68371	Modeller	216:A	1662	KEAESCDCLQGFQLTHSLGGGTGSGMGTLLISK	0	P68371	TBB4B_HUMAN	122	121	P68371	Modeller	122:A	939	39.15	Intra	1	1	12	34412	6
TLKLTTPTYGDLNHLVSATMSGVTTCLR	2	P68371	TBB4B_HUMAN	216	213	P68371	Modeller	216:A	1662	KEAESCDCLQGFQLTHSLGGGTGSGMGTLLISKIR	32	P68371	TBB4B_HUMAN	154	121	P68371	Modeller	154:A	1159	38.2	Intra	4	1	12	35182	5
TLKLTTPTYGDLNHLVSATMSGVTTCLR	2	P68371	TBB4B_HUMAN	216	213	P68371	Modeller	216:A	1662	TLKLTTPTYGDLNHLVSATMSGVTTCLR	2	P68371	TBB4B_HUMAN	216	213	P68371	Modeller	216:A	1662	####	1	2	1	12	38406	5
DVNAAIATIKTK	9	Q71U36	TBA1A_HUMAN	336	326	5JCO	Structure	336:A	29287	SGPFGQIFRPDNFVFGQSGAGNNWAKGHYTEGAELVDSVLDVVR	25	P68371	TBB4B_HUMAN	103	77	P68371	Modeller	103:A	793	####	1	1	0.9	2	38045	5
GDVVPKDVNAAIATIK	5	Q71U36	TBA1A_HUMAN	326	320	5JCO	Structure	326:A	29217	SGPFGQIFRPDNFVFGQSGAGNNWAKGHYTEGAELVDSVLDVVR	25	P68371	TBB4B_HUMAN	103	77	P68371	Modeller	103:A	793	####	1	2	1	2	37757	5
GAFGKPQGTVAR	4	Q96L21	RL10L_HUMAN	121	116	####		####	####	SGPFGQIFRPDNFVFGQSGAGNNWAKGHYTEGAELVDSVLDVVR	25	P68371	TBB4B_HUMAN	103	77	P68371	Modeller	103:A	793	####	2	1	0.84	2	36418	5
INKMLSCAGADR	2	Q96L21	RL10L_HUMAN	101	98	####		####	####	SGPFGQIFRPDNFVFGQSGAGNNWAKGHYTEGAELVDSVLDVVR	25	P68371	TBB4B_HUMAN	103	77	P68371	Modeller	103:A	793	####	2	1	0.9	2	36572	5
KLPFQR	0	P68431	H31_HUMAN	65	64	5AV9	Structure	64:E	3293	YQKSTELLIR	2	P68431	H31_HUMAN	57	54	5AV9	Structure	56:E	3227	20.38	Intra	4	1	19	20967	4
KQLATK	0	P68431	H31_HUMAN	19	18	5AV9	Structure	####	####	KQLATK	0	P68431	H31_HUMAN	19	18	5AV9	Structure	####	####	####	1	1	0.98	19	9305	4
KQLATK	0	P68431	H31_HUMAN	19	18	P68431	Phyre	19:A	128	KSAPATGGVK	0	P68431	H31_HUMAN	28	27	P68431	Phyre	28:A	196	16.83	Intra	4	1	19	8907	4
KQLATK	0	P68431	H31_HUMAN	19	18	P68431	Phyre	19:A	128	KSTGGKAPR	5	P68431	H31_HUMAN	15	9	P68431	Phyre	15:A	96	8.98	Intra	6	1	19	6359	4
KQLATK	0	P68431	H31_HUMAN	19	18	P68431	Phyre	19:A	128	RYQKSTELLIR	3	P68431	H31_HUMAN	57	53	P68431	Phyre	57:A	428	50.47	Intra	2	1	19	14869	5
KQLATK	0	P68431	H31_HUMAN	19	18	P68431	Phyre	19:A	128	TKQTAR	1	P68431	H31_HUMAN	5	3	P68431	Phyre	5:A	25	16.73	Intra	13	1	19	7043	4
KQLATK	0	P68431	H31_HUMAN	19	18	P68431	Phyre	19:A	128	YQKSTELLIR	2	P68431	H31_HUMAN	57	54	P68431	Phyre	57:A	428	50.47	Intra	7	1	19	16783	4
KQLATKAAR	5	P68431	H31_HUMAN	24	18	P68431	Phyre	24:A	166	YQKSTELLIR	2	P68431	H31_HUMAN	57	54	P68431	Phyre	57:A	428	43.19	Intra	5	1	19	15122	5
KSAPATGGVK	0	P68431	H31_HUMAN	28	27	P68431	Phyre	28:A	196	KQLATKAAR	5	P68431	H31_HUMAN	24	18	P68431	Phyre	24:A	166	11.91	Intra	3	1	19	7686	5
KSTGGKAPR	5	P68431	H31_HUMAN	15	9	P68431	Phyre	15:A	96	KQLATKAAR	5	P68431	H31_HUMAN	24	18	P68431	Phyre	24:A	166	8.13	Intra	2	1	19	5350	5
QLATKAAR	4	P68431	H31_HUMAN	24	19	P68431	Phyre	24:A	166	YQKSTELLIR	2	P68431	H31_HUMAN	57	54	P68431	Phyre	57:A	428	43.19	Intra	3	1	19	17314	4
STGGKAPR	4	P68431	H31_HUMAN	15	10	P68431	Phyre	15:A	96	KQLATKAAR	5	P68431	H31_HUMAN	24	18	P68431	Phyre	24:A	166	8.13	Intra	4	1	19	6574	5
TKQTAR	1	P68431	H31_HUMAN	5	3	P68431	Phyre	5:A	25	KLPFQR	0	P68431	H31_HUMAN	65	64	P68431	Phyre	65:A	494	62.58	Intra	2	1	19	13187	4
TKQTAR	1	P68431	H31_HUMAN	5	3	P68431	Phyre	5:A	25	KQLATKAAR	5	P68431	H31_HUMAN	24	18	P68431	Phyre	24:A	166	26.1	Intra	13	1	19	6004	4
TKQTAR	1	P68431	H31_HUMAN	5	3	P68431	Phyre	5:A	25	KSTGGKAPR	5	P68431	H31_HUMAN	15	9	P68431	Phyre	15:A	96	19.69	Intra	6	1	19	4536	5
TKQTAR	1	P68431	H31_HUMAN	5	3	P68431	Phyre	5:A	25	QLATKAAR	4	P68431	H31_HUMAN	24	19	P68431	Phyre	24:A	166	26.1	Intra	3	1	19	7926	4
TKQTAR	1	P68431	H31_HUMAN	5	3	P68431	Phyre	5:A	25	STGGKAPR	4	P68431	H31_HUMAN	15	10	P68431	Phyre	15:A	96	19.69	Intra	11	1	19	4933	4
TKQTAR	1	P68431	H31_HUMAN	5	3	5AV9	Structure	####	####	TKQTAR	1	P68431	H31_HUMAN	5	3	5AV9	Structure	####	####	####	1	11	1	19	4833	4
TKQTAR	1	P68431	H31_HUMAN	5	3	P68431	Phyre	5:A	25	YQKSTELLIR	2	P68431	H31_HUMAN	57	54	P68431	Phyre	57:A	428	53.2	Intra	6	1	19	15442	4
AVTKYTSSK	3	Q16778	H2B2E_HUMAN	121	117	P68431_Q16778	Docking	121:B	944	KQLATKAAR	5	P68431	H31_HUMAN	24	18	P68431_Q16778	Docking	24:A	166	50.22	1	1	0.94	4	8358	5
KLPFQR	0	P68431	H31_HUMAN	65	64	P68431_Q16778	Docking	65:A	494	KESYSIYVYK	0	Q16778	H2B2E_HUMAN	35	34	P68431_Q16778	Docking	35:B	274	70.92	1	4	1	4	19981	4
KQLATK	0	P68431	H31_HUMAN	19	18	P68431_Q16778	Docking	19:A	128	AVTKYTSSK	3	Q16778	H2B2E_HUMAN	121	117	P68431_Q16778	Docking	121:B	944	38.96	1	1	1	4	9936	4
TKQTAR	1	P68431	H31_HUMAN	5	3	P68431_Q16778	Docking	5:A	25	AVTKYTSSK	3	Q16778	H2B2E_HUMAN	121	117	P68431_Q16778	Docking	121:B	944	33.65	1	6	1	4	7788	4
TKQTAR	1	P68431	H31_HUMAN	5	3	P68431_Q8WYJ6	Docking	5:A	25	QKIRDQLK	1	Q8WYJ6	SEPT1_HUMAN	186	184	P68431_Q8WYJ6	Docking	186:B	1280	40.28	2	2	0.93	1	9161	4
TKQTAR	1	P68431	H31_HUMAN	5	3	P68431_Q96KK5	Docking	5:A	####	KGNYAER	0	Q96KK5	H2A1H_HUMAN	37	36	P68431_Q96KK5	Docking	37:B	268	####	1	2	1	1	6153	4
ILLAKER	4	P78347	GTF2I_HUMAN	426	421	####		####	####	EFNFEKWNAR	5	P78347	GTF2I_HUMAN	353	347	####		####	####	####	Intra	1	1	2	22537	4
LEKIIQVGNR	2	P78347	GTF2I_HUMAN	526	523	####		####	####	TNTPVKEDWNVR	5	P78347	GTF2I_HUMAN	561	555	####		####	####	####	Intra	1	1	2	20708	4
SLHDALCVLAQTVKDSR	13	P78371	TCPB_HUMAN	402	388	P78371_P78371	Docking	402:A	2930	SLHDALCVLAQTVKDSR	13	P78371	TCPB_HUMAN	402	388	P78371_P78371	Docking	402:B	2930	66.44	N/A	5	1	1	37788	5
SLGKGSAPPGPVPEGSIR	3	P78417	GSTO1_HUMAN	11	7	4YQU	Structure	11:B	1941	MILELFSKVPSLVGSFIR	7	P78417	GSTO1_HUMAN	122	114	4YQU	Structure	122:B	2831	32.28	Intra	3	1	1	43107	4
AFLGELKTQMTSAVR	6	P78527	PRKDC_HUMAN	205	198	5LUQ	Structure	205:B	31386	EIFNFVLKAIRPQIDLK	7	P78527	PRKDC_HUMAN	254	246	5LUQ	Structure	254:B	31765	18.53	Intra	4	1	16	37033	5
ALKLNSNEAR	2	P78527	PRKDC_HUMAN	3455	3452	5LUQ	Structure	3455:B	54007	GKPLPEYHVR	1	P78527	PRKDC_HUMAN	3710	3708	5LUQ	Structure	3710:B	56068	8.81	Intra	2	1	16	14846	5
ALKMSPYK	2	P78527	PRKDC_HUMAN	1407	1404	P78527		1407:A	11129	HQGLKLATTILQHWK	4	P78527	PRKDC_HUMAN	1617	1612	P78527		1617:A	12735	43.96	Intra	3	1	16	23080	5
ALKM[147.04]SPYK	2	P78527	PRKDC_HUMAN	1407	1404	P78527		1407:A	11129	HQGLKLATTILQHWK	4	P78527	PRKDC_HUMAN	1617	1612	P78527		1617:A	12735	43.96	Intra	1	1	16	22011	5
FGKEVAVK	2	P78527	PRKDC_HUMAN	712	709	5LUQ	Structure	712:A	5337	GKPLPEYHVR	1	P78527	PRKDC_HUMAN	3710	3708	5LUQ	Structure	3710:A	26219	30.97	Intra	5	1	16	15345	5
FYQGFLFSEKPEK	9	P78527	PRKDC_HUMAN	1970	1960	5LUQ	Structure	1970:A	13784	INQVFHGSCITEGNELTKTLIK	17	P78527	PRKDC_HUMAN	1913	1895	5LUQ	Structure	1913:A	13317	29.69	Intra	2	1	16	26604	5
GKPLPEYHVR	1	P78527	PRKDC_HUMAN	3710	3708	P78527		3710:A	29602	YFEGVSPKSLK	7	P78527	PRKDC_HUMAN	689	681	P78527		689:A	5441	30.05	Intra	1	1	16	17559	5
KCDSWWAK	0	P78527	PRKDC_HUMAN	1628	1627	P78527		1628:A	12829	HQGLKLATTILQHWK	4	P78527	PRKDC_HUMAN	1617	1612	P78527		1617:A	12735	30.49	Intra	2	1	16	24645	5
KGVAEQK	0	P78527	PRKDC_HUMAN	2746	2745	P78527		2746:A	21873	FIVCLNKVTK	6	P78527	PRKDC_HUMAN	2366	2359	P78527		2366:A	18785	13.14	Intra	1	1	16	18850	4
KSLNSIEFR	0	P78527	PRKDC_HUMAN	71	70	5LUQ	Structure	71:A	453	IGELFSKFYGELALK	6	P78527	PRKDC_HUMAN	155	148	5LUQ	Structure	155:A	1136	22.51	Intra	7	1	16	33271	4
KSLNSIEFR	0	P78527	PRKDC_HUMAN	71	70	5LUQ	Structure	71:A	453	LMDEFKIGELFSK	5	P78527	PRKDC_HUMAN	148	142	5LUQ	Structure	148:A	1081	23.54	Intra	2	1	16	31430	4
KSLNSIEFR	0	P78527	PRKDC_HUMAN	71	70	5LUQ	Structure	71:A	453	NTCTSVYTKDR	8	P78527	PRKDC_HUMAN	117	108	5LUQ	Structure	117:A	829	8.89	Intra	5	1	16	17850	4
NTCTSVYTKDR	8	P78527	PRKDC_HUMAN	117	108	5LUQ	Structure	117:A	829	IGELFSKFYGELALK	6	P78527	PRKDC_HUMAN	155	148	5LUQ	Structure	155:A	1136	19.57	Intra	5	1	16	30381	4
NTCTSVYTKDR	8	P78527	PRKDC_HUMAN	117	108	5LUQ	Structure	117:A	829	LMDEFKIGELFSK	5	P78527	PRKDC_HUMAN	148	142	5LUQ	Structure	148:A	1081	24.46	Intra	1	1	16	28285	4
SLFKR	3	P78527	PRKDC_HUMAN	1061	1057	5LUQ	Structure	1061:B	37695	KFIQTFGK	0	P78527	PRKDC_HUMAN	3631	3630	5LUQ	Structure	3631:B	55427	19.9	Intra	1	1	16	19079	4
TGKWK	2	P78527	PRKDC_HUMAN	518	515	P78527		518:A	4051	MGQKIAPYSVEIK	3	P78527	PRKDC_HUMAN	99	95	P78527		99:A	743	70.2	Intra	2	1	16	18304	4
AITGASLADIMAKR	12	P83731	RL24_HUMAN	93	80	P83731	Phyre	93:A	758	VELCSFSGYKIYPGHGR	9	P83731	RL24_HUMAN	12	2	P83731	Phyre	12:A	88	62.57	Intra	1	1	6	25517	4
AVKFQR	2	P83731	RL24_HUMAN	77	74	P83731	Phyre	77:A	641	NQKPEVR	2	P83731	RL24_HUMAN	97	94	P83731	Phyre	97:A	795	24.28	Intra	4	1	6	11491	4
AVKFQR	2	P83731	RL24_HUMAN	77	74	P83731	Phyre	77:A	641	VELCSFSGYKIYPGHGR	9	P83731	RL24_HUMAN	12	2	P83731	Phyre	12:A	88	43.38	Intra	2	1	6	18868	4
KGQSEEIQK	0	P83731	RL24_HUMAN	61	60	P83731	Phyre	61:A	508	VELCSFSGYKIYPGHGR	9	P83731	RL24_HUMAN	12	2	P83731	Phyre	12:A	88	18.48	Intra	1	1	6	17608	5
NQKPEVR	2	P83731	RL24_HUMAN	97	94	P83731	Phyre	97:A	795	VELCSFSGYKIYPGHGR	9	P83731	RL24_HUMAN	12	2	P83731	Phyre	12:A	88	66.44	Intra	3	1	6	17673	5
TDGKVFQFLNAK	3	P83731	RL24_HUMAN	27	23	P83731	Phyre	27:A	211	VELCSFSGYKIYPGHGR	9	P83731	RL24_HUMAN	12	2	P83731	Phyre	12:A	88	19.2	Intra	2	1	6	25356	4
LSVDYGKK	6	Q71U36	TBA1A_HUMAN	163	156	Q71U36	Phyre	163:A	1240	VELCSFSGYKIYPGHGR	9	P83731	RL24_HUMAN	12	2	P83731	Phyre	12:A	88	####	1	3	1	1	19642	5
GAFGKPQGTVAR	4	Q96L21	RL10L_HUMAN	121	116	5T2C	Structure	####	####	VELCSFSGYKIYPGHGR	9	P83731	RL24_HUMAN	12	2	5T2C	Structure	####	####	####	1	1	0.8	1	19274	5
EKIYVLLR	1	P84090	ERH_HUMAN	90	88	P84090_Q9NYF8	Docking	90:A	716	FTSYQKATEEHSTR	5	Q9NYF8	BCLF1_HUMAN	637	631	P84090_Q9NYF8	Docking	637:B	5123	20.8	2	3	1	1	19086	5
KGTANAR	0	P84098	RL19_HUMAN	82	81	P84098	Phyre	82:A	656	HMGIGKR	5	P84098	RL19_HUMAN	80	74	P84098	Phyre	80:A	636	6.29	Intra	4	1	8	7935	5
KGTANAR	0	P84098	RL19_HUMAN	82	81	P84098	Phyre	82:A	656	KPVTVHSR	0	P84098	RL19_HUMAN	53	52	P84098	Phyre	53:A	422	39.86	Intra	2	1	8	6272	5
KGTANAR	0	P84098	RL19_HUMAN	82	81	P84098	Phyre	82:A	656	MPEKVTWMR	3	P84098	RL19_HUMAN	92	88	P84098	Phyre	92:A	729	19.89	Intra	4	1	8	16159	4
KGTANAR	0	P84098	RL19_HUMAN	82	81	P84098	Phyre	82:A	656	MPEKVTWM[147.04]R	3	P84098	RL19_HUMAN	92	88	P84098	Phyre	92:A	729	19.89	Intra	4	1	8	13466	4
KGTANAR	0	P84098	RL19_HUMAN	82	81	P84098	Phyre	82:A	656	M[147.04]PEKVTWMR	3	P84098	RL19_HUMAN	92	88	P84098	Phyre	92:A	729	19.89	Intra	3	1	8	14263	4
KNTLAR	0	P84098	RL19_HUMAN	65	64	P84098	Phyre	65:A	519	KGTANAR	0	P84098	RL19_HUMAN	82	81	P84098	Phyre	82:A	656	21.07	Intra	2	1	8	7276	4
KNTLAR	0	P84098	RL19_HUMAN	65	64	P84098	Phyre	65:A	519	KPVTVHSR	0	P84098	RL19_HUMAN	53	52	P84098	Phyre	53:A	422	28.48	Intra	5	1	8	8222	4
KNTLAR	0	P84098	RL19_HUMAN	65	64	P84098	Phyre	65:A	519	MPEKVTWMR	3	P84098	RL19_HUMAN	92	88	P84098	Phyre	92:A	729	30.9	Intra	1	1	8	17620	4
TADKGWQNSIR	3	P85037	FOXK1_HUMAN	347	343	P85037	Phyre	347:A	358	SQEEPGKGSFWR	6	P85037	FOXK1_HUMAN	375	368	P85037	Phyre	375:A	595	18.2	Intra	2	1	3	18439	4
YFIKVPR	3	P85037	FOXK1_HUMAN	365	361	P85037	Phyre	365:A	517	SQEEPGKGSFWR	6	P85037	FOXK1_HUMAN	375	368	P85037	Phyre	375:A	595	12.72	Intra	2	1	3	21780	4
YFIKVPR	3	P85037	FOXK1_HUMAN	365	361	P85037	Phyre	365:A	517	TADKGWQNSIR	3	P85037	FOXK1_HUMAN	347	343	P85037	Phyre	347:A	358	21.53	Intra	3	1	3	19980	4
TMKIIMK	2	P98172	EFNB1_HUMAN	159	156	P98172	Phyre	159:A	1029	FLSGKGLVIYPK	4	P98172	EFNB1_HUMAN	48	43	P98172	Phyre	48:A	134	11.52	Intra	1	0.97	1	24508	4
KGAVITQIR	0	Q00341	VIGLN_HUMAN	1071	1070	2CTK	Structure	####	####	KGAVITQIR	0	Q00341	VIGLN_HUMAN	1071	1070	2CTK	Structure	####	####	####	N/A	6	1	3	15223	5
YHPKIIGR	3	Q00341	VIGLN_HUMAN	1066	1062	####		####	####	KGAVITQIR	0	Q00341	VIGLN_HUMAN	1071	1070	####		####	####	####	Intra	6	1	3	15200	4
YVIGQKGSGIR	5	Q00341	VIGLN_HUMAN	991	985	2CTK	Structure	35:A	504	SFKLSVTVDPK	2	Q00341	VIGLN_HUMAN	1054	1051	2CTK	Structure	98:A	1494	36.97	Intra	2	1	3	21003	4
EGQFKDIITK	4	Q00610	CLH1_HUMAN	1392	1387	Q00610	Phyre	1392:A	11155	LKLLLPWLEAR	1	Q00610	CLH1_HUMAN	856	854	Q00610	Phyre	856:A	6801	60.72	Intra	2	1	14	34935	4
IAAYLFKGNNR	6	Q00610	CLH1_HUMAN	1516	1509	Q00610	Phyre	1516:A	12197	MYDAAKLLYNNVSNFGR	5	Q00610	CLH1_HUMAN	1215	1209	Q00610	Phyre	1215:A	9703	52.65	Intra	2	1	14	30368	4
KANSTR	0	Q00610	CLH1_HUMAN	1246	1245	Q00610	Phyre	1246:A	9941	IAAYLFKGNNR	6	Q00610	CLH1_HUMAN	1516	1509	Q00610	Phyre	1516:A	12197	65.99	Intra	2	1	14	16051	4
KANSTR	0	Q00610	CLH1_HUMAN	1246	1245	Q00610	Phyre	1246:A	9941	LKLLLPWLEAR	1	Q00610	CLH1_HUMAN	856	854	Q00610	Phyre	856:A	6801	145.63	Intra	5	1	14	30013	4
KANSTR	0	Q00610	CLH1_HUMAN	1246	1245	Q00610	Phyre	1246:A	9941	MYDAAKLLYNNVSNFGR	5	Q00610	CLH1_HUMAN	1215	1209	Q00610	Phyre	1215:A	9703	14.71	Intra	4	1	14	24577	4
KFNALFAQGNYSEAAK	0	Q00610	CLH1_HUMAN	367	366	Q00610	Phyre	367:A	2861	LHIIEVGTPPTGNQPFPKK	17	Q00610	CLH1_HUMAN	245	227	Q00610	Phyre	245:A	1903	29.56	Intra	1	1	14	22972	5
KVGYTPDWIFLLR	0	Q00610	CLH1_HUMAN	507	506	Q00610	Phyre	507:A	3963	WLKEDKLECSEELGDLVK	2	Q00610	CLH1_HUMAN	453	450	Q00610	Phyre	453:A	3544	22.28	Intra	5	1	14	33193	5
LKLLLPWLEAR	1	Q00610	CLH1_HUMAN	856	854	Q00610	Phyre	856:A	6801	YCEKRDPHLACVAYER	3	Q00610	CLH1_HUMAN	911	907	Q00610	Phyre	911:A	7257	16.34	Intra	6	1	14	26975	6
QKWLLLTGISAQQNR	1	Q00610	CLH1_HUMAN	163	161	4G55	Structure	163:A	1330	KVSQPIEGHAASFAQFK	0	Q00610	CLH1_HUMAN	189	188	4G55	Structure	189:A	1547	10.12	Intra	10	1	14	25003	5
QKWLLLTGISAQQNR	1	Q00610	CLH1_HUMAN	163	161	4G55	Structure	163:A	1330	LHIIEVGTPPTGNQPFPKK	17	Q00610	CLH1_HUMAN	245	227	4G55	Structure	245:A	1964	19.56	Intra	1	1	14	26771	5
VVGKYCEK	3	Q00610	CLH1_HUMAN	907	903	Q00610	Phyre	907:A	7221	LKLLLPWLEAR	1	Q00610	CLH1_HUMAN	856	854	Q00610	Phyre	856:A	6801	18.21	Intra	1	1	14	31977	4
WKQSVELCK	1	Q00610	CLH1_HUMAN	1522	1520	Q00610	Phyre	1522:A	12251	LEKHELIEFR	2	Q00610	CLH1_HUMAN	1501	1498	Q00610	Phyre	1501:A	12062	17.24	Intra	5	1	14	19436	5
YCEKR	3	Q00610	CLH1_HUMAN	911	907	Q00610	Phyre	911:A	7257	LKLLLPWLEAR	1	Q00610	CLH1_HUMAN	856	854	Q00610	Phyre	856:A	6801	16.34	Intra	5	1	14	30554	4
YIEIYVQKVNPSR	7	Q00610	CLH1_HUMAN	806	798	Q00610	Phyre	806:A	6413	AHIAQLCEKAGLLQR	8	Q00610	CLH1_HUMAN	619	610	Q00610	Phyre	619:A	4865	71.63	Intra	1	1	14	22265	5
KAVVVCPK	0	Q00839	HNRPU_HUMAN	602	601	####		####	####	DEDYKQR	4	Q00839	HNRPU_HUMAN	614	609	####		####	####	####	Intra	1	1	4	12423	4
KAVVVCPK	0	Q00839	HNRPU_HUMAN	602	601	####		####	####	TTWVTKHAAENPGK	5	Q00839	HNRPU_HUMAN	516	510	####		####	####	####	Intra	7	1	4	13517	5
KMCLFAGFQR	0	Q00839	HNRPU_HUMAN	592	591	####		####	####	APQCLGKFIEIAAR	6	Q00839	HNRPU_HUMAN	565	558	####		####	####	####	Intra	2	1	4	30250	4
KM[147.04]CLFAGFQR	0	Q00839	HNRPU_HUMAN	592	591	####		####	####	APQCLGKFIEIAAR	6	Q00839	HNRPU_HUMAN	565	558	####		####	####	####	Intra	5	1	4	28113	4
EGEDMIAEEHFGSEKIR	14	Q01082	SPTB2_HUMAN	714	699	Q01082	Phyre	714:A	5416	VLVLSQDYGKHLLGVEDLLQK	9	Q01082	SPTB2_HUMAN	558	548	Q01082	Phyre	558:A	4145	16.92	Intra	2	1	4	28030	5
LPKPTK	2	Q01082	SPTB2_HUMAN	102	99	Q01082	Phyre	102:A	429	MLIKLLEVLSGER	3	Q01082	SPTB2_HUMAN	90	86	Q01082	Phyre	90:A	335	11.05	Intra	2	1	4	33775	4
LPKPTKGR	5	Q01082	SPTB2_HUMAN	105	99	Q01082	Phyre	105:A	452	MLIKLLEVLSGER	3	Q01082	SPTB2_HUMAN	90	86	Q01082	Phyre	90:A	335	13.45	Intra	4	1	4	30174	4
NQTLQKEIQGHQPR	5	Q01082	SPTB2_HUMAN	1532	1526	####		####	####	LADLKQLWGLLIEETEKR	4	Q01082	SPTB2_HUMAN	1571	1566	####		####	####	####	Intra	1	1	4	35263	5
DLTKR	3	Q01105	SET_HUMAN	181	177	####		####	####	SSQTQNKASR	6	Q01105	SET_HUMAN	189	182	Q01105	Unknown	189:A	5595	####	Intra	5	1	5	8018	4
SGKDLTK	2	Q01105	SET_HUMAN	177	174	####		####	####	SSQTQNKASR	6	Q01105	SET_HUMAN	189	182	Q01105	Unknown	189:A	5595	####	Intra	6	1	5	7566	4
SGKDLTKR	2	Q01105	SET_HUMAN	177	174	####		####	####	SSQTQNKASR	6	Q01105	SET_HUMAN	189	182	Q01105	Unknown	189:A	5595	####	Intra	6	1	5	6445	4
YNKLR	2	Q01105	SET_HUMAN	75	72	2e+50	Structure	62:P	3404	QPFFQKR	5	Q01105	SET_HUMAN	83	77	2e+50	Structure	70:P	3479	13.47	Intra	1	1	5	15750	4
YNKLR	2	Q01105	SET_HUMAN	75	72	2e+50	Structure	62:B	1848	YNKLR	2	Q01105	SET_HUMAN	75	72	2e+50	Structure	62:A	454	29.3	1	5	1	5	11904	4
ALAAPAAEEKEEAR	9	Q01650	LAT1_HUMAN	19	9	####		####	####	MLAAKSADGSAPAGEGEGVTLQR	4	Q01650	LAT1_HUMAN	30	25	####		####	####	####	Intra	7	1	1	17683	4
APKGSLR	2	Q01813	PFKAP_HUMAN	10	7	####		####	####	EQWWLKLRPLMK	5	Q01813	PFKAP_HUMAN	753	747	Q01813	Phyre	753:A	5575	####	Intra	2	1	15	24722	5
APKGSLR	2	Q01813	PFKAP_HUMAN	10	7	####		####	####	EQWWLKLRPLM[147.04]K	5	Q01813	PFKAP_HUMAN	753	747	Q01813	Phyre	753:A	5575	####	Intra	2	1	15	22370	5
APKGSLR	2	Q01813	PFKAP_HUMAN	10	7	####		####	####	IPKEQWWLK	2	Q01813	PFKAP_HUMAN	747	744	Q01813	Phyre	747:A	5512	####	Intra	4	1	15	20114	4
APKGSLR	2	Q01813	PFKAP_HUMAN	10	7	####		####	####	KFLEHLSGAGK	0	Q01813	PFKAP_HUMAN	15	14	####		####	####	####	Intra	1	1	15	13930	5
APKGSLR	2	Q01813	PFKAP_HUMAN	10	7	####		####	####	NFGTKISAR	4	Q01813	PFKAP_HUMAN	688	683	Q01813	Phyre	688:A	5038	####	Intra	4	1	15	13755	4
IKQSASGTK	1	Q01813	PFKAP_HUMAN	567	565	4XYJ	Structure	567:B	10052	NFGTKISAR	4	Q01813	PFKAP_HUMAN	688	683	4XYJ	Structure	688:B	10995	35.19	Intra	1	1	15	11930	4
IPKEQWWLK	2	Q01813	PFKAP_HUMAN	747	744	4XYJ	Structure	747:H	46409	VLPGKYLEEIATQMR	4	Q01813	PFKAP_HUMAN	486	481	4XYJ	Structure	486:H	44405	26.76	Intra	1	1	15	32935	4
KFLEHLSGAGK	0	Q01813	PFKAP_HUMAN	15	14	4XYJ	Structure	15:C	11776	EQWWLKLRPLMK	5	Q01813	PFKAP_HUMAN	753	747	4XYJ	Structure	753:C	17360	12.4	Intra	5	1	15	25358	6
LKEAR	1	Q01813	PFKAP_HUMAN	702	700	4XYJ	Structure	702:E	28635	NFGTKISAR	4	Q01813	PFKAP_HUMAN	688	683	4XYJ	Structure	688:E	28523	21.35	Intra	5	1	15	12941	4
NFGTKISAR	4	Q01813	PFKAP_HUMAN	688	683	4XYJ	Structure	688:E	28523	AMEWITAKLK	7	Q01813	PFKAP_HUMAN	700	692	4XYJ	Structure	700:E	28618	18.73	Intra	7	1	15	23485	4
NFGTKISAR	4	Q01813	PFKAP_HUMAN	688	683	4XYJ	Structure	688:E	28523	AM[147.04]EWITAKLK	7	Q01813	PFKAP_HUMAN	700	692	4XYJ	Structure	700:E	28618	18.73	Intra	5	1	15	21012	4
NFGTKISAR	4	Q01813	PFKAP_HUMAN	688	683	4XYJ	Structure	688:G	40208	FTTDDSICVLGISKR	13	Q01813	PFKAP_HUMAN	724	710	4XYJ	Structure	724:G	40432	17.57	Intra	3	1	15	22756	4
NFGTKISAR	4	Q01813	PFKAP_HUMAN	688	683	4XYJ	Structure	688:F	34373	LAIKLPDDQIPK	3	Q01813	PFKAP_HUMAN	400	396	4XYJ	Structure	400:F	32194	17.05	Intra	2	1	15	22148	4
NFGTKISAR	4	Q01813	PFKAP_HUMAN	688	683	4XYJ	Structure	688:F	34373	SFAGNLNTYKR	9	Q01813	PFKAP_HUMAN	395	385	4XYJ	Structure	395:F	32153	12.25	Intra	11	1	15	17261	4
VLPGKYLEEIATQMR	4	Q01813	PFKAP_HUMAN	486	481	4XYJ	Structure	486:H	44405	KNVLGHMQQGGAPSPFDR	0	Q01813	PFKAP_HUMAN	666	665	4XYJ	Structure	666:H	45798	40.02	Intra	1	1	15	28456	5
EYKVVGR	2	Q02543	RL18A_HUMAN	11	8	Q02543	Phyre	11:A	73	FWYFVSQLKK	8	Q02543	RL18A_HUMAN	52	43	Q02543	Phyre	52:A	414	17.18	Intra	8	1	4	24836	4
EYKVVGR	2	Q02543	RL18A_HUMAN	11	8	Q02543	Phyre	11:A	73	VKNFGIWLR	1	Q02543	RL18A_HUMAN	76	74	Q02543	Phyre	76:A	604	21.41	Intra	7	1	4	23266	4
VEEIAASKCR	7	Q02543	RL18A_HUMAN	136	128	Q02543	Phyre	136:A	1093	FWYFVSQLKK	8	Q02543	RL18A_HUMAN	52	43	Q02543	Phyre	52:A	414	33.48	Intra	3	1	4	25631	4
VKNFGIWLR	1	Q02543	RL18A_HUMAN	76	74	Q02543	Phyre	76:A	604	IFAPNHVVAKSR	9	Q02543	RL18A_HUMAN	41	31	Q02543	Phyre	41:A	310	28.05	Intra	1	1	4	22026	5
ALELDSNNEKGLFR	9	Q02790	FKBP4_HUMAN	354	344	1QZ2	Structure	354:C	6330	LASHLNLAMCHLKLQAFSAAIESCNK	12	Q02790	FKBP4_HUMAN	331	318	1QZ2	Structure	331:C	6157	14.58	Intra	11	1	5	27475	5
GTVYFKEGK	5	Q02790	FKBP4_HUMAN	282	276	1QZ2	Structure	282:A	1140	ALELDSNNEKGLFR	9	Q02790	FKBP4_HUMAN	354	344	1QZ2	Structure	354:A	1713	17.31	Intra	3	1	5	22598	4
GTVYFKEGK	5	Q02790	FKBP4_HUMAN	282	276	1QZ2	Structure	282:B	3446	LASHLNLAMCHLKLQAFSAAIESCNK	12	Q02790	FKBP4_HUMAN	331	318	1QZ2	Structure	331:B	3846	11.27	Intra	2	1	5	25115	4
LEQSTIVKER	7	Q02790	FKBP4_HUMAN	274	266	1QZ2	Structure	274:B	3381	ALELDSNNEKGLFR	9	Q02790	FKBP4_HUMAN	354	344	1QZ2	Structure	354:B	4019	16.91	Intra	2	1	5	21738	4
LEQSTIVKER	7	Q02790	FKBP4_HUMAN	274	266	1QZ2	Structure	274:B	3381	LASHLNLAMCHLKLQAFSAAIESCNK	12	Q02790	FKBP4_HUMAN	331	318	1QZ2	Structure	331:B	3846	17.51	Intra	9	1	5	24695	6
HLTDAYFKK	7	Q02878	RL6_HUMAN	218	210	Q02878	Phyre	218:A	1520	THQKFVIATSTK	3	Q02878	RL6_HUMAN	192	188	Q02878	Phyre	192:A	1312	21.82	Intra	1	1	3	15545	5
IKAIPQLQGYLR	1	Q02878	RL6_HUMAN	262	260	Q02878	Phyre	262:A	1896	KIDQKAVDSQILPK	4	Q02878	RL6_HUMAN	251	246	Q02878	Phyre	251:A	1812	15.27	Intra	1	1	3	22978	5
KPFSQHVR	0	Q02878	RL6_HUMAN	131	130	5T2C	Structure	####	####	KPFSQHVR	0	Q02878	RL6_HUMAN	131	130	5T2C	Structure	####	####	####	N/A	1	0.99	3	18869	4
YKFLNNFDR	1	Q04446	GLGB_HUMAN	578	576	4BZY	Structure	578:B	9380	FKIVLDSDAAEYGGHQR	1	Q04446	GLGB_HUMAN	647	645	4BZY	Structure	647:B	9954	25.34	Intra	2	1	1	23663	4
TPATKR	4	Q04637	IF4G1_HUMAN	1183	1178	####		####	####	SFSKEVEER	3	Q04637	IF4G1_HUMAN	1188	1184	####		####	####	####	Intra	4	1	1	10767	4
KPDDGKMK	5	Q04760	LGUL_HUMAN	157	151	3W0T	Structure	156:B	2633	FEELGVKFVK	6	Q04760	LGUL_HUMAN	148	141	3W0T	Structure	147:B	2564	19.4	Intra	10	1	6	17923	5
KPDDGKMK	5	Q04760	LGUL_HUMAN	157	151	3W0T	Structure	156:B	2633	RFEELGVKFVK	7	Q04760	LGUL_HUMAN	148	140	3W0T	Structure	147:B	2564	19.4	Intra	4	1	6	16035	4
KPDDGKM[147.04]K	5	Q04760	LGUL_HUMAN	157	151	3W0T	Structure	156:B	2633	FEELGVKFVK	6	Q04760	LGUL_HUMAN	148	141	3W0T	Structure	147:B	2564	19.4	Intra	7	1	6	17137	4
KPDDGKM[147.04]K	5	Q04760	LGUL_HUMAN	157	151	3W0T	Structure	156:B	2633	RFEELGVKFVK	7	Q04760	LGUL_HUMAN	148	140	3W0T	Structure	147:B	2564	19.4	Intra	4	1	6	15463	5
KSLDFYTR	0	Q04760	LGUL_HUMAN	44	43	3W0T	Structure	43:B	1705	FEELGVKFVK	6	Q04760	LGUL_HUMAN	148	141	3W0T	Structure	147:B	2564	13.49	Intra	2	1	6	25030	4
KSLDFYTR	0	Q04760	LGUL_HUMAN	44	43	3W0T	Structure	43:B	1705	RFEELGVKFVK	7	Q04760	LGUL_HUMAN	148	140	3W0T	Structure	147:B	2564	13.49	Intra	7	1	6	21627	5
AAKQPHVGDYR	2	Q06323	PSME1_HUMAN	190	187	1AVO	Structure	190:N	10924	AAKQPHVGDYR	2	Q06323	PSME1_HUMAN	190	187	1AVO	Structure	190:L	9299	12.49	1	1	1	3	9554	5
AAKQPHVGDYR	2	Q06323	PSME1_HUMAN	190	187	1AVO	Structure	190:D	2799	LEGFHTQISKYFSER	9	Q06323	PSME1_HUMAN	176	166	1AVO	Structure	176:D	2691	20.79	Intra	4	1	3	17694	5
GDAVTKAAK	5	Q06323	PSME1_HUMAN	187	181	1AVO	Structure	187:B	1155	LEGFHTQISKYFSER	9	Q06323	PSME1_HUMAN	176	166	1AVO	Structure	176:B	1066	16.39	Intra	3	1	3	18877	5
TKVEAFQTTISK	1	Q9UL46	PSME2_HUMAN	156	154	Q06323_Q9UL46	Docking	156:B	505	LEGFHTQISKYFSER	9	Q06323	PSME1_HUMAN	176	166	Q06323_Q9UL46	Docking	176:A	1066	23.88	1	8	1	1	22038	5
DISLSDYKGK	7	Q06830	PRDX1_HUMAN	35	27	4XCS	Structure	35:A	273	IGHPAPNFKATAVMPDGQFK	8	Q06830	PRDX1_HUMAN	16	7	4XCS	Structure	16:A	128	13.82	Intra	1	1	1	21347	4
HNKDR	2	Q07020	RL18_HUMAN	9	6	Q07020	Modeller	9:A	66	LLVKLYR	3	Q07020	RL18_HUMAN	30	26	Q07020	Modeller	30:A	251	27.24	Intra	8	1	6	15287	5
LKVCALR	1	Q07020	RL18_HUMAN	99	97	Q07020	Modeller	99:A	816	AGGKILTFDQLALDSPK	3	Q07020	RL18_HUMAN	119	115	Q07020	Modeller	119:A	966	4.69	Intra	5	1	6	25984	4
LLVKLYR	3	Q07020	RL18_HUMAN	30	26	Q07020	Modeller	30:A	251	EPKSQDIYLR	2	Q07020	RL18_HUMAN	19	16	Q07020	Modeller	19:A	157	13.25	Intra	3	1	6	21715	4
LLVKLYR	3	Q07020	RL18_HUMAN	30	26	Q07020	Modeller	30:A	251	KEPKSQDIYLR	3	Q07020	RL18_HUMAN	19	15	Q07020	Modeller	19:A	157	13.25	Intra	3	1	6	19257	5
LLVKLYR	3	Q07020	RL18_HUMAN	30	26	Q07020	Modeller	30:A	251	TNSTFNQVVLKR	10	Q07020	RL18_HUMAN	49	38	Q07020	Modeller	49:A	415	12.44	Intra	8	1	6	22768	4
VQEVPKLK	5	Q07020	RL18_HUMAN	97	91	Q07020	Modeller	97:A	799	AGGKILTFDQLALDSPK	3	Q07020	RL18_HUMAN	119	115	Q07020	Modeller	119:A	966	8.22	Intra	5	1	6	26309	4
IHEKV	3	Q07065	CKAP4_HUMAN	601	597	####		####	####	LFVKVEK	3	Q07065	CKAP4_HUMAN	594	590	####		####	####	####	Intra	1	0.95	1	16516	4
SQWTDKMDLR	5	Q07864	DPOE1_HUMAN	43	37	####		####	####	TGWLINMHPTEILDEDKR	16	Q07864	DPOE1_HUMAN	76	59	####		####	####	####	Intra	2	1	1	27042	4
KMTPSYEIR	0	Q08211	DHX9_HUMAN	16	15	####		####	####	NFLYAWCGKR	8	Q08211	DHX9_HUMAN	14	5	####		####	####	####	Intra	1	1	1	21990	4
KSQLVYQSR	0	Q08380	LG3BP_HUMAN	427	426	####		####	####	RGPLVKYSSDYFQAPSDYR	5	Q08380	LG3BP_HUMAN	441	435	####		####	####	####	Intra	1	0.82	1	18557	5
KSTPSR	0	Q08945	SSRP1_HUMAN	640	639	####		####	####	GSSSKSSSR	4	Q08945	SSRP1_HUMAN	650	645	####		####	####	####	Intra	1	1	2	4895	4
VALGHGLKLLTK	7	Q08945	SSRP1_HUMAN	63	55	####		####	####	NGHVYKYDGFR	5	Q08945	SSRP1_HUMAN	73	67	####		####	####	####	Intra	2	1	2	18853	5
DLCVKGWNWGTVK	4	Q08945	SSRP1_HUMAN	105	100	4IFS	Structure	####	####	KSNVSYKNPSLMPK	6	Q9Y5B9	SP16H_HUMAN	513	506	5E5B	Structure	####	####	####	1	5	1	5	22410	5
DLCVKGWNWGTVK	4	Q08945	SSRP1_HUMAN	105	100	4IFS	Structure	####	####	KSNVSYKNPSLM[147.04]PK	6	Q9Y5B9	SP16H_HUMAN	513	506	5E5B	Structure	####	####	####	1	1	0.92	5	21131	5
GEQQIQKAR	6	Q9Y5B9	SP16H_HUMAN	504	497	5E5B	Structure	####	####	DLCVKGWNWGTVK	4	Q08945	SSRP1_HUMAN	105	100	4IFS	Structure	####	####	####	1	1	0.97	5	22732	4
KSNVSYK	0	Q9Y5B9	SP16H_HUMAN	507	506	5E5B	Structure	####	####	DLCVKGWNWGTVK	4	Q08945	SSRP1_HUMAN	105	100	4IFS	Structure	####	####	####	1	1	0.97	5	22817	4
SNVSYKNPSLMPK	5	Q9Y5B9	SP16H_HUMAN	513	507	5E5B	Structure	####	####	DLCVKGWNWGTVK	4	Q08945	SSRP1_HUMAN	105	100	4IFS	Structure	####	####	####	1	1	0.97	5	25726	4
GKASIR	1	Q08J23	NSUN2_HUMAN	683	681	####		####	####	KLSSETYSQAK	0	Q08J23	NSUN2_HUMAN	640	639	####		####	####	####	Intra	1	1	5	10246	4
KNIDVWK	0	Q08J23	NSUN2_HUMAN	279	278	Q08J23	Phyre	279:A	1406	KWTTLNSLQLHGLQLR	0	Q08J23	NSUN2_HUMAN	286	285	Q08J23	Phyre	286:A	1469	16.31	Intra	8	1	5	25314	5
NVLLNNSEKMK	8	Q08J23	NSUN2_HUMAN	577	568	Q08J23	Phyre	577:A	2776	ILPHHQNTGGFFVAVLVKK	17	Q08J23	NSUN2_HUMAN	429	411	Q08J23	Phyre	429:A	2221	21.83	Intra	1	1	5	22371	5
SSMPWNKR	6	Q08J23	NSUN2_HUMAN	437	430	Q08J23	Phyre	437:A	2288	ILPHHQNTGGFFVAVLVKK	17	Q08J23	NSUN2_HUMAN	429	411	Q08J23	Phyre	429:A	2221	20.03	Intra	1	1	5	22260	5
TFVPKNER	4	Q08J23	NSUN2_HUMAN	692	687	####		####	####	VINTGIKVWCR	6	Q08J23	NSUN2_HUMAN	586	579	Q08J23	Phyre	586:A	2844	####	Intra	4	1	5	19142	4
SKATNDEIFSILK	1	Q09161	NCBP1_HUMAN	511	509	1N52	Structure	####	####	SKATNDEIFSILK	1	Q09161	NCBP1_HUMAN	511	509	1N52	Structure	####	####	####	1	4	0.95	1	34733	4
LQYYDKVLR	5	Q12769	NU160_HUMAN	965	959	Q12769	Phyre	965:A	6843	KHIISHLFSQPK	0	Q12769	NU160_HUMAN	833	832	####		####	####	####	Intra	7	1	1	18155	6
LWTIKNNECVR	4	Q12788	TBL3_HUMAN	593	588	Q12788	Phyre	593:A	4326	LWALQDFSCLKTFEGHDASVLK	10	Q12788	TBL3_HUMAN	557	546	Q12788	Phyre	557:A	4055	8.87	Intra	1	1	1	30618	4
SLGFLPKMPR	6	Q12789	TF3C1_HUMAN	796	789	####		####	####	KCAMLEYTTGSR	0	Q12789	TF3C1_HUMAN	1090	1089	####		####	####	####	Intra	1	1	1	24038	4
LLAKLR	3	Q12857	NFIA_HUMAN	78	74	Q12857	Phyre	78:A	141	QKWASR	1	Q12857	NFIA_HUMAN	70	68	Q12857	Phyre	70:A	75	14.51	Intra	2	1	1	16034	4
LLKDLR	2	Q12905	ILF2_HUMAN	228	225	Q12905	Phyre	228:A	1542	KLDPELHLDIKVLQSALAAIR	10	Q12905	ILF2_HUMAN	196	185	Q12905	Phyre	196:A	1285	24.03	Intra	3	1	1	35555	6
FQGAGSNKK	7	Q12906	ILF3_HUMAN	573	565	2L33	Structure	64:A	1000	VAKAYAALAALEK	2	Q12906	ILF3_HUMAN	577	574	2L33	Structure	68:A	1070	6.13	Intra	2	0.99	1	20619	4
KVLIQTK	0	Q12931	TRAP1_HUMAN	369	368	5Y3N	Structure	369:A	2080	YTLHYKTDAPLNIR	5	Q12931	TRAP1_HUMAN	332	326	5Y3N	Structure	332:A	1871	14.12	Intra	3	1	1	18797	4
KYDGYAR	0	Q12965	MYO1E_HUMAN	694	693	Q12965	Phyre	694:A	5333	VIQKSWR	3	Q12965	MYO1E_HUMAN	704	700	Q12965	Phyre	704:A	5418	19.18	Intra	1	1	2	13825	4
TVAAKYIMSYISR	4	Q12965	MYO1E_HUMAN	123	118	Q12965	Phyre	123:A	825	VQHVKDIILQSNPLLEAFGNAK	4	Q12965	MYO1E_HUMAN	143	138	Q12965	Phyre	143:A	979	13.08	Intra	2	1	2	35618	4
IFQKFLQR	3	Q12965	MYO1E_HUMAN	631	627	Q12965	Phyre	631:A	4815	NAFISCIWKLNQR	8	Q9NV70	EXOC1_HUMAN	117	108	####		####	####	####	2	1	0.87	1	27459	4
KYGVTTLVR	0	Q12974	TP4A2_HUMAN	36	35	5K23	Structure	36:A	286	FLITHNPTNATLNKFTEELK	13	Q12974	TP4A2_HUMAN	29	15	5K23	Structure	29:A	228	10.67	Intra	2	1	1	25296	5
NAMNKVFWR	4	Q13011	ECH1_HUMAN	83	78	2VRE	Structure	57:C	4348	EMVECFNKISR	7	Q13011	ECH1_HUMAN	95	87	2VRE	Structure	69:C	4465	19.17	Intra	1	1	1	22559	4
AVAEGKR	5	Q13057	COASY_HUMAN	464	458	Q13057	Phyre	464:A	980	LKGLGAFVIDSDHLGHR	1	Q13057	COASY_HUMAN	379	377	Q13057	Phyre	379:A	326	12.16	Intra	6	1	1	19342	5
KVFVGR	0	Q13148	TADBP_HUMAN	192	191	Q13148	Phyre	192:A	812	GISVHISNAEPKHNSNR	11	Q13148	TADBP_HUMAN	263	251	####		####	####	####	Intra	7	1	3	13226	5
KVFVGR	0	Q13148	TADBP_HUMAN	192	191	Q13148	Phyre	192:A	812	TGHSKGFGFVR	4	Q13148	TADBP_HUMAN	145	140	Q13148	Phyre	145:A	420	31.17	Intra	1	1	3	16391	5
KVFVGR	0	Q13148	TADBP_HUMAN	192	191	Q13148	Phyre	192:A	812	WCDCKLPNSK	4	Q13148	TADBP_HUMAN	176	171	Q13148	Phyre	176:A	681	32.78	Intra	2	1	3	15926	4
GGPVQVLEDEELKSQPEPLVVK	12	Q13228	SBP1_HUMAN	370	357	####		####	####	GGLKLNPNFLVDFGKEPLGPALAHELR	3	Q13228	SBP1_HUMAN	437	433	Q13228	Phyre	437:A	3217	####	Intra	1	1	2	34655	6
LHKVIEPK	2	Q13228	SBP1_HUMAN	120	117	Q13228	Phyre	120:A	851	TKLVLPSLISSR	1	Q13228	SBP1_HUMAN	93	91	Q13228	Phyre	93:A	642	10.2	Intra	4	1	2	22261	5
EKDVER	1	Q13243	SRSF5_HUMAN	18	16	Q13243	Phyre	18:A	112	FFKGYGR	2	Q13243	SRSF5_HUMAN	25	22	Q13243	Phyre	25:A	178	10.04	Intra	2	1	1	13517	4
KLLASLVK	0	Q13263	TIF1B_HUMAN	254	253	####		####	####	LGDKHATLQK	3	Q13263	TIF1B_HUMAN	266	262	####		####	####	####	Intra	4	1	2	17476	5
LGDKHATLQK	3	Q13263	TIF1B_HUMAN	266	262	####		####	####	KLIYFQLHR	0	Q13263	TIF1B_HUMAN	366	365	####		####	####	####	Intra	2	1	2	17621	6
IVGSKPLYVALAQR	4	Q13310	PABP4_HUMAN	361	356	Q13310	Phyre	361:A	2663	YQGVNLYIKNLDDTIDDEKLR	8	Q13310	PABP4_HUMAN	299	290	Q13310	Phyre	299:A	2190	10.45	Intra	3	1	1	28759	5
SWFEGQGLAGKLR	10	Q9H3U1	UN45A_HUMAN	411	400	2DBA	Structure	####	####	MPILISKIFPGLAADQSR	6	Q13425	SNTB2_HUMAN	144	137	2VRF	Structure	144:A	253	####	2	3	1	1	32641	4
KGAAPAPPR	0	Q13428	TCOF_HUMAN	449	448	####		####	####	AASAPAKESPR	6	Q13428	TCOF_HUMAN	379	372	####		####	####	####	Intra	2	1	1	8987	4
KSGAANR	0	Q13459	MYO9B_HUMAN	1736	1735	5C5S	Structure	155:D	5170	LENFPIHAITGVLKQWLR	13	Q13459	MYO9B_HUMAN	1772	1758	5C5S	Structure	191:D	5443	11.55	Intra	2	1	1	35266	5
MSFVKGWGPDYPR	4	Q13485	SMAD4_HUMAN	507	502	1DD1	Structure	507:B	3301	APGDAVHKIYPSAYIK	7	Q13485	SMAD4_HUMAN	428	420	1DD1	Structure	428:B	2778	9.69	Intra	3	1	1	23574	5
KFLMECR	0	Q13541	4EBP1_HUMAN	57	56	####		####	####	NSPVTKTPPR	5	Q13541	4EBP1_HUMAN	69	63	####		####	####	####	Intra	3	1	1	16104	4
KFNAR	0	Q13555	KCC2G_HUMAN	293	292	2V7O	Structure	293:A	2342	LKGAILTTMLVSR	1	Q13555	KCC2G_HUMAN	301	299	2V7O	Structure	301:A	2411	12.2	Intra	1	0.94	1	24209	4
IMKMR	2	Q13619	CUL4A_HUMAN	705	702	2HYE	Structure	705:C	15730	KTLGHNLLVSELYNQLK	0	Q13619	CUL4A_HUMAN	708	707	2HYE	Structure	708:C	15758	5.49	Intra	1	1	1	24312	5
KTASNSK	0	Q13630	FCL_HUMAN	282	281	4E5Y	Structure	282:C	6846	NIKYNLDFWR	2	Q13630	FCL_HUMAN	81	78	4E5Y	Structure	81:C	5365	20.68	Intra	2	0.99	1	21469	4
ELKVCLLGDTGVGK	2	Q13636	RAB31_HUMAN	7	4	Q13636	Modeller	7:A	51	TVPCGNELHKFLIWDTAGQER	9	Q13636	RAB31_HUMAN	55	45	Q13636	Modeller	55:A	410	8.31	Intra	1	1	1	28994	5
HASLMKR	5	Q13813	SPTN1_HUMAN	2063	2057	Q13813	Phyre	2063:A	1500	HVQSKAIEAR	4	Q13813	SPTN1_HUMAN	2052	2047	Q13813	Phyre	2052:A	1416	16.25	Intra	2	1	6	9620	5
KFMLFR	0	Q13813	SPTN1_HUMAN	1093	1092	####		####	####	GMLEKSCK	4	Q13813	SPTN1_HUMAN	1089	1084	####		####	####	####	Intra	3	1	6	21929	4
KFMLFR	0	Q13813	SPTN1_HUMAN	1093	1092	####		####	####	TASPWKSAR	5	Q13813	SPTN1_HUMAN	1193	1187	####		####	####	####	Intra	4	1	6	22532	4
LAQFVEHWKELK	8	Q13813	SPTN1_HUMAN	1853	1844	####		####	####	LEAELAAHEPAIQGVLDTGKK	19	Q13813	SPTN1_HUMAN	1828	1808	####		####	####	####	Intra	1	1	6	23594	5
LLQAQKLVQYLR	5	Q13813	SPTN1_HUMAN	150	144	####		####	####	VNEVNQFAAKLIQEQHPEEELIK	9	Q13813	SPTN1_HUMAN	214	204	####		####	####	####	Intra	1	1	6	31253	5
TASPWKSAR	5	Q13813	SPTN1_HUMAN	1193	1187	####		####	####	LMVHTVATFNSIKELNER	12	Q13813	SPTN1_HUMAN	1209	1196	####		####	####	####	Intra	1	1	6	21227	5
DFLLKPELLR	4	Q13838	DX39B_HUMAN	53	48	####		####	####	DVKGSYVSIHSSGFR	2	Q13838	DX39B_HUMAN	36	33	####		####	####	####	Intra	4	1	3	26960	4
FSKYMPNVK	2	Q13838	DX39B_HUMAN	138	135	1XTK	Structure	138:A	720	DFLLKPELLR	4	Q13838	DX39B_HUMAN	53	48	1XTK	Structure	53:A	63	12.61	Intra	3	1	3	28973	4
KDEEVLK	0	Q13838	DX39B_HUMAN	156	155	1XTK	Structure	156:A	860	KNCPHIVVGTPGR	0	Q13838	DX39B_HUMAN	163	162	1XTK	Structure	163:A	919	10.78	Intra	4	1	3	13969	5
ITEVQQKR	6	Q13868	EXOS2_HUMAN	94	87	2NN6	Structure	####	####	FAKVHILYVGSMPLK	2	Q9Y3B2	EXOS1_HUMAN	84	81	2NN6	Structure	####	####	####	1	2	1	1	21801	5
EQLGKTGIAGSR	4	Q13884	SNTB1_HUMAN	314	309	####		####	####	KEAWFSPVHTYPLLATR	0	Q13884	SNTB1_HUMAN	363	362	####		####	####	####	Intra	3	1	2	23964	5
EQLGKTGIAGSR	4	Q13884	SNTB1_HUMAN	314	309	####		####	####	RKEAWFSPVHTYPLLATR	1	Q13884	SNTB1_HUMAN	363	361	####		####	####	####	Intra	1	1	2	21363	6
AYLKMAEEK	3	Q14152	EIF3A_HUMAN	95	91	Q14152	Phyre	95:A	736	TWQKIHEPIMLK	3	Q14152	EIF3A_HUMAN	45	41	Q14152	Phyre	45:A	320	26.09	Intra	3	1	2	20329	5
KNLTQDEMQR	0	Q14152	EIF3A_HUMAN	308	307	Q14152	Phyre	308:A	2496	VSTVFWKSGNALFHASTLHR	6	Q14152	EIF3A_HUMAN	285	278	Q14152	Phyre	285:A	2305	27.89	Intra	1	1	2	21193	6
KAEFR	0	Q14152	EIF3A_HUMAN	191	190	Q14152_Q99613	Docking	191:A	1532	AKELLGQGLLLR	1	Q99613	EIF3C_HUMAN	643	641	Q14152_Q99613	Docking	643:B	2614	19.03	1	1	0.97	2	23355	4
KLCDNLR	0	Q14152	EIF3A_HUMAN	196	195	Q14152_Q99613	Docking	196:A	1577	AKELLGQGLLLR	1	Q99613	EIF3C_HUMAN	643	641	Q14152_Q99613	Docking	643:B	2614	24.74	1	3	1	2	23911	4
LTKGQVGGTFAR	2	Q14181	DPOA2_HUMAN	564	561	4Y97	Structure	564:E	12928	YFVKDVLGCVCVNPGR	3	Q14181	DPOA2_HUMAN	549	545	4Y97	Structure	549:E	12821	21.82	Intra	3	1	1	24146	4
ALKSVLVSAGNVK	2	Q14204	DYHC1_HUMAN	2094	2091	5NUG	Structure	2094:A	5039	TESVKALGHQLGR	4	Q14204	DYHC1_HUMAN	1917	1912	5NUG	Structure	1917:A	3717	16.68	Intra	1	1	12	19456	5
FKVQYPQSQACK	1	Q14204	DYHC1_HUMAN	624	622	Q14204	Modeller	624:A	5020	MKLNTQEIFDDWAR	1	Q14204	DYHC1_HUMAN	692	690	Q14204	Modeller	692:A	5569	30.73	Intra	3	1	12	27559	4
FQSISTEFLALMKK	12	Q14204	DYHC1_HUMAN	1580	1567	5NUG	Structure	1580:A	1100	VSKSPLVMDVLNIQGVQR	2	Q14204	DYHC1_HUMAN	1584	1581	5NUG	Structure	1584:A	1131	6.21	Intra	3	1	12	38587	4
GELQKR	4	Q14204	DYHC1_HUMAN	2297	2292	5NUG	Structure	2297:A	6489	VLLKALER	3	Q14204	DYHC1_HUMAN	2239	2235	5NUG	Structure	2239:A	6027	13.16	Intra	2	1	12	17805	4
IKNVVHELR	1	Q14204	DYHC1_HUMAN	956	954	Q14204	Modeller	956:A	7705	YKLYQEMFAWK	1	Q14204	DYHC1_HUMAN	981	979	Q14204	Modeller	981:A	7918	16.99	Intra	1	1	12	23889	4
KIIDSVR	0	Q14204	DYHC1_HUMAN	2286	2285	5NUG	Structure	2286:A	6402	VLLKALER	3	Q14204	DYHC1_HUMAN	2239	2235	5NUG	Structure	2239:A	6027	22.47	Intra	4	1	12	20442	4
KVQQR	0	Q14204	DYHC1_HUMAN	705	704	Q14204	Modeller	705:A	5684	VPLAIVNKAHQANQLYPFAISLIESVR	7	Q14204	DYHC1_HUMAN	767	759	Q14204	Modeller	767:A	6183	36.33	Intra	1	1	12	35193	4
SLAMTKPDR	5	Q14204	DYHC1_HUMAN	2043	2037	5NUG	Structure	2043:A	4629	IVPFFKLCDEQLSSQSHYDFGLR	5	Q14204	DYHC1_HUMAN	2074	2068	5NUG	Structure	2074:A	4878	12.52	Intra	1	1	12	28135	5
SLAMTKPDR	5	Q14204	DYHC1_HUMAN	2043	2037	5NUG	Structure	2043:A	4629	TESVKALGHQLGR	4	Q14204	DYHC1_HUMAN	1917	1912	5NUG	Structure	1917:A	3717	18.13	Intra	1	1	12	16089	4
SLAMTKPDR	5	Q14204	DYHC1_HUMAN	2043	2037	5NUG	Structure	2043:A	4629	WVMLKNVHLAPGWLMQLEK	4	Q14204	DYHC1_HUMAN	4097	4092	5NUG	Structure	4097:A	19105	35.07	Intra	4	1	12	31475	5
TVENIKDPLFR	5	Q14204	DYHC1_HUMAN	4406	4400	5NUG	Structure	4406:A	21315	TLHTTASNWLHLIPQTLSHLKR	20	Q14204	DYHC1_HUMAN	4399	4378	5NUG	Structure	4399:A	21283	20.04	Intra	5	1	12	29185	5
VLLKALER	3	Q14204	DYHC1_HUMAN	2239	2235	5NUG	Structure	2239:A	6027	HEALLYTWLAEHKPLVLCGPPGSGK	12	Q14204	DYHC1_HUMAN	2589	2576	5NUG	Structure	2589:A	8697	26.98	Intra	1	1	12	29857	6
KDFSELR	0	Q14320	FA50A_HUMAN	236	235	Q14320	Modeller	236:A	1951	KGNTMQQFLQKALEILR	10	Q14320	FA50A_HUMAN	229	218	Q14320	Modeller	229:A	1893	10.96	Intra	18	1	4	39579	4
KDFSELR	0	Q14320	FA50A_HUMAN	236	235	Q14320	Modeller	236:A	1951	KGNTM[147.04]QQFLQKALEILR	10	Q14320	FA50A_HUMAN	229	218	Q14320	Modeller	229:A	1893	10.96	Intra	1	1	4	31410	5
TVKMR	2	Q14320	FA50A_HUMAN	216	213	Q14320	Modeller	216:A	1783	GNTMQQFLQKALEILR	9	Q14320	FA50A_HUMAN	229	219	Q14320	Modeller	229:A	1893	20.57	Intra	1	1	4	41758	4
TVKMR	2	Q14320	FA50A_HUMAN	216	213	Q14320	Modeller	216:A	1783	KGNTMQQFLQKALEILR	10	Q14320	FA50A_HUMAN	229	218	Q14320	Modeller	229:A	1893	20.57	Intra	3	1	4	37792	5
YLTVNKR	5	Q14571	ITPR2_HUMAN	136	130	Q14571	Phyre	136:A	1042	YSAQKQYWK	4	Q14571	ITPR2_HUMAN	70	65	Q14571	Phyre	70:A	502	16.45	Intra	2	1	1	15493	4
LGILIKAR	5	Q14683	SMC1A_HUMAN	129	123	Q14683	Phyre	129:A	999	SGELAQEYDKR	9	Q14683	SMC1A_HUMAN	170	160	Q14683	Phyre	170:A	1316	26.49	Intra	2	1	2	19605	4
VKTLR	1	Q14683	SMC1A_HUMAN	59	57	Q14683	Phyre	59:A	454	LGILIKAR	5	Q14683	SMC1A_HUMAN	129	123	Q14683	Phyre	129:A	999	23.11	Intra	6	1	2	19392	4
FDTPFLPKPLFFR	7	Q14684	RRP1B_HUMAN	652	644	####		####	####	AKSSTATHPPGPAVQLNK	1	Q14684	RRP1B_HUMAN	660	658	####		####	####	####	Intra	2	1	1	28296	5
VQKLSR	2	Q15008	PSMD6_HUMAN	382	379	5M32	Structure	382:m	72462	KGDLLLNR	0	Q15008	PSMD6_HUMAN	372	371	5M32	Structure	372:m	72413	15	Intra	4	1	1	15980	4
KAIILTR	0	Q15021	CND1_HUMAN	531	530	Q15021	Phyre	531:A	2412	IYQLLAKASYK	6	Q15021	CND1_HUMAN	526	519	Q15021	Phyre	526:A	2371	9.09	Intra	4	1	1	22335	4
KAPTSSSQR	0	Q15029	U5S1_HUMAN	359	358	5O9Z	Structure	359:B	12330	LWGDIYFNPKTR	9	Q15029	U5S1_HUMAN	352	342	5O9Z	Structure	352:B	12295	13.87	Intra	6	1	1	20570	4
AVGWWKR	5	Q15041	AR6P1_HUMAN	124	118	Q15041	Phyre	124:A	370	FHEICSNLVKTR	9	Q15041	AR6P1_HUMAN	114	104	Q15041	Phyre	114:A	277	15.44	Intra	5	1	1	18631	5
IIHKLFVNAQR	3	Q15042	RB3GP_HUMAN	896	892	####		####	####	FGTEKCEQEEEKEDLER	4	Q15042	RB3GP_HUMAN	857	852	####		####	####	####	Intra	1	0.82	1	15599	5
SKIITYIR	1	Q15046	SYK_HUMAN	249	247	3BJU	Structure	249:C	9530	MVSGMVKHITGSYK	6	Q15046	SYK_HUMAN	363	356	3BJU	Structure	363:C	10460	11.9	Intra	9	1	1	19508	4
KAATALK	0	Q15084	PDIA6_HUMAN	67	66	Q15084	Phyre	67:A	334	SGGYSSGKQGR	7	Q15084	PDIA6_HUMAN	150	142	####		####	####	####	Intra	1	0.95	2	8667	4
LTPEWKK	5	Q15084	PDIA6_HUMAN	66	60	Q15084	Phyre	66:A	325	SGGYSSGKQGR	7	Q15084	PDIA6_HUMAN	150	142	####		####	####	####	Intra	2	1	2	12530	4
DPYSGSTISLFQAMQKGLVLR	15	Q15149	PLEC_HUMAN	3590	3574	####		####	####	LYVHEAVKAGVVGPELHEQLLSAEK	7	Q15149	PLEC_HUMAN	3551	3543	####		####	####	####	Intra	3	1	15	32770	4
GHLSGLAKR	7	Q15149	PLEC_HUMAN	923	915	####		####	####	AKAVVQLKPR	1	Q15149	PLEC_HUMAN	926	924	####		####	####	####	Intra	3	1	15	12796	5
KAALEEVER	0	Q15149	PLEC_HUMAN	2142	2141	####		####	####	VQKSLAAEEEAAR	2	Q15149	PLEC_HUMAN	2129	2126	####		####	####	####	Intra	2	1	15	15861	4
KASDSELER	0	Q15149	PLEC_HUMAN	2037	2036	####		####	####	RLEEQAAQHKADIEER	9	Q15149	PLEC_HUMAN	2025	2015	####		####	####	####	Intra	2	1	15	9944	5
KEAEQEAAR	0	Q15149	PLEC_HUMAN	2277	2276	####		####	####	AQAQAAAEKLR	8	Q15149	PLEC_HUMAN	2274	2265	####		####	####	####	Intra	4	1	15	10156	4
KESYSALMR	0	Q15149	PLEC_HUMAN	792	791	Q15149	Unknown	792:A	3398	EAEGQLQKLQEALR	7	Q15149	PLEC_HUMAN	877	869	Q15149	Unknown	877:A	4023	64.6	Intra	1	1	15	24563	4
KGWLYYEAGQR	0	Q15149	PLEC_HUMAN	4513	4512	####		####	####	INLAQKAFCGFEDPR	5	Q15149	PLEC_HUMAN	4491	4485	####		####	####	####	Intra	1	1	15	26639	4
KLTFR	0	Q15149	PLEC_HUMAN	4019	4018	####		####	####	AVTGYKDPYSGK	5	Q15149	PLEC_HUMAN	4152	4146	####		####	####	####	Intra	1	1	15	16179	4
KLTFR	0	Q15149	PLEC_HUMAN	4019	4018	####		####	####	KGLLSAEVAR	0	Q15149	PLEC_HUMAN	3849	3848	####		####	####	####	Intra	1	1	15	19366	4
KLTFR	0	Q15149	PLEC_HUMAN	4019	4018	####		####	####	KQITMEELVR	0	Q15149	PLEC_HUMAN	4027	4026	####		####	####	####	Intra	2	1	15	21500	4
LKTEAEIALK	1	Q15149	PLEC_HUMAN	1986	1984	####		####	####	VLAEKLAAIGEATR	4	Q15149	PLEC_HUMAN	1975	1970	####		####	####	####	Intra	3	1	15	26154	4
LKTISLVIR	1	Q15149	PLEC_HUMAN	1226	1224	5J1I	Structure	1116:B	3361	AQAEVEGLGKGVAR	9	Q15149	PLEC_HUMAN	1175	1165	5J1I	Structure	1065:B	2999	25.64	Intra	3	1	15	24251	4
SAEAELQSKR	8	Q15149	PLEC_HUMAN	1718	1709	####		####	####	ASFAEKTAQLER	5	Q15149	PLEC_HUMAN	1725	1719	####		####	####	####	Intra	3	1	15	17202	4
TAQKLR	3	Q15149	PLEC_HUMAN	4561	4557	####		####	####	KGWLYYEAGQR	0	Q15149	PLEC_HUMAN	4513	4512	####		####	####	####	Intra	1	1	15	17576	4
TAQKLR	3	Q15149	PLEC_HUMAN	4561	4557	####		####	####	LKISYK	1	Q15149	PLEC_HUMAN	4580	4578	####		####	####	####	Intra	1	1	15	13479	4
KGESGQSWPR	0	Q15185	TEBP_HUMAN	79	78	1EJF	Structure	79:B	1566	AKLNWLSVDFNNWK	1	Q15185	TEBP_HUMAN	95	93	1EJF	Structure	95:B	1694	21.31	Intra	1	1	2	27618	4
LTKER	2	Q15185	TEBP_HUMAN	91	88	1EJF	Structure	91:B	1660	AKLNWLSVDFNNWK	1	Q15185	TEBP_HUMAN	95	93	1EJF	Structure	95:B	1694	10.64	Intra	1	1	2	26588	4
DKGFGFIR	1	Q15233	NONO_HUMAN	109	107	3SDE	Structure	109:B	2429	GIVEFSGKPAAR	7	Q15233	NONO_HUMAN	198	190	3SDE	Structure	198:B	3137	18.83	Intra	1	1	5	23198	4
KQLELR	0	Q15233	NONO_HUMAN	338	337	####		####	####	AAPGAEFAPNKR	10	Q15233	NONO_HUMAN	467	456	####		####	####	####	Intra	3	1	5	16152	4
KQLELR	0	Q15233	NONO_HUMAN	338	337	####		####	####	MEELHNQEVQKR	10	Q15233	NONO_HUMAN	336	325	####		####	####	####	Intra	2	1	5	13159	5
KQLELR	0	Q15233	NONO_HUMAN	338	337	####		####	####	M[147.04]EELHNQEVQKR	10	Q15233	NONO_HUMAN	336	325	####		####	####	####	Intra	4	1	5	12265	5
KQLELR	0	Q15233	NONO_HUMAN	338	337	####		####	####	RMEELHNQEVQKR	11	Q15233	NONO_HUMAN	336	324	####		####	####	####	Intra	1	1	5	11778	5
VKYSR	1	Q15269	PWP2_HUMAN	273	271	####		####	####	LAKYFFNK	2	Q15269	PWP2_HUMAN	279	276	####		####	####	####	Intra	2	1	1	17129	4
KGESVK	0	Q15365	PCBP1_HUMAN	32	31	Q15365	Phyre	32:A	222	LLMHGKEVGSIIGK	5	Q15365	PCBP1_HUMAN	23	17	Q15365	Phyre	23:A	136	14.9	Intra	3	0.99	1	16111	5
LYKDDQLLDDGK	2	Q15370	ELOB_HUMAN	46	43	Q15369_Q15370	Docking	46:B	381	EIPSHVLSKVCMYFTYK	8	Q15369	ELOC_HUMAN	72	63	Q15369_Q15370	Docking	72:A	1119	20.09	1	3	1	1	27725	4
AVMISAIEKQK	8	Q15393	SF3B3_HUMAN	137	128	Q15393_Q9BWJ5	Docking	137:A	1060	YTIHSQLEHLQSKYIGTGHADTTK	12	Q9BWJ5	SF3B5_HUMAN	17	4	Q15393_Q9BWJ5	Docking	17:B	17	18.46	1	3	1	1	18704	5
LGSGPDGAEEIKR	11	Q15418	KS6A1_HUMAN	316	304	####		####	####	HVFYSTIDWNKLYR	10	Q15418	KS6A1_HUMAN	328	317	####		####	####	####	Intra	3	1	1	22234	5
SLFSSIGEVESAKLIR	12	Q15717	ELAV1_HUMAN	50	37	4ED5	Structure	50:A	254	DKVAGHSLGYGFVNYVTAK	1	Q15717	ELAV1_HUMAN	55	53	4ED5	Structure	55:A	296	13.85	Intra	4	1	1	29835	5
KAMGYQPLVTMDDAMER	0	Q15738	NSDHL_HUMAN	345	344	Q15738	Modeller	345:A	2713	DSTLGGKAFHITNDEPIPFWTFLSR	6	Q15738	NSDHL_HUMAN	263	256	Q15738	Modeller	263:A	2036	29.48	Intra	2	1	1	38415	5
LIYSGKQMNDEK	5	Q15843	NEDD8_HUMAN	48	42	4FBJ	Structure	48:B	2547	TAADYKILGGSVLHLVLALR	5	Q15843	NEDD8_HUMAN	60	54	4FBJ	Structure	60:B	2653	12.8	Intra	8	1	3	36719	4
LIYSGKQM[147.04]NDEK	5	Q15843	NEDD8_HUMAN	48	42	4FBJ	Structure	48:B	2547	TAADYKILGGSVLHLVLALR	5	Q15843	NEDD8_HUMAN	60	54	4FBJ	Structure	60:B	2653	12.8	Intra	1	1	3	36370	5
VKTLTGK	1	Q15843	NEDD8_HUMAN	6	4	4FBJ	Structure	6:B	2178	TAADYKILGGSVLHLVLALR	5	Q15843	NEDD8_HUMAN	60	54	4FBJ	Structure	60:B	2653	18.35	Intra	2	1	3	37108	5
LNKVIK	2	Q16531	DDB1_HUMAN	1060	1057	3EI3	Structure	1060:A	8136	SVGKIEHSFWR	3	Q16531	DDB1_HUMAN	1067	1063	3EI3	Structure	1067:A	8186	11.76	Intra	1	0.86	1	17519	5
KVTGTLDANR	0	Q16658	FSCN1_HUMAN	399	398	3LLP	Structure	399:B	6732	LSCFAQTVSPAEKWSVHIAMHPQVNIYSVTR	12	Q16658	FSCN1_HUMAN	131	118	3LLP	Structure	131:B	4656	30.03	Intra	5	1	3	24669	5
VNASASSLKK	8	Q16658	FSCN1_HUMAN	41	32	3LLP	Structure	41:B	3965	KVTGTLDANR	0	Q16658	FSCN1_HUMAN	399	398	3LLP	Structure	399:B	6732	19.56	Intra	5	1	3	11900	4
YLAADKDGNVTCER	5	Q16658	FSCN1_HUMAN	74	68	3LLP	Structure	74:A	468	YLTAEAFGFKVNASASSLKK	9	Q16658	FSCN1_HUMAN	32	22	3LLP	Structure	32:A	192	17.56	Intra	1	1	3	21794	5
TGKLGPGLR	2	Q16762	THTR_HUMAN	24	21	Q16762	Phyre	24:A	116	ALVSTKWLAESIR	5	Q16762	THTR_HUMAN	14	8	Q16762	Phyre	14:A	35	13.77	Intra	2	1	1	25248	4
LAWAKEK	4	Q16775	GLO2_HUMAN	249	244	1QH5	Structure	201:A	1535	VYCGHEYTINNLKFAR	12	Q16775	GLO2_HUMAN	229	216	1QH5	Structure	181:A	1375	10.88	Intra	6	1	1	19185	5
AVTKYTSSK	3	Q16778	H2B2E_HUMAN	121	117	4NFT	Structure	89:A	697	KESYSIYVYKVLK	9	Q16778	H2B2E_HUMAN	44	34	4NFT	Structure	12:A	102	19.46	Intra	4	1	6	19817	5
AVTKYTSSK	3	Q16778	H2B2E_HUMAN	121	117	4NFT	Structure	89:D	4893	LLLPGELAKHAVSEGTK	8	Q16778	H2B2E_HUMAN	109	100	4NFT	Structure	77:D	4808	18.35	Intra	5	1	6	19841	4
AVTKYTSSK	3	Q16778	H2B2E_HUMAN	121	117	4NFT	Structure	89:A	697	VLKQVHPDTGISSK	2	Q16778	H2B2E_HUMAN	47	44	4NFT	Structure	15:A	126	21.4	Intra	5	1	6	11816	5
HAVSEGTKAVTK	7	Q16778	H2B2E_HUMAN	117	109	4NFT	Structure	85:B	2103	ESYSIYVYKVLK	8	Q16778	H2B2E_HUMAN	44	35	4NFT	Structure	12:B	1536	19.37	Intra	1	1	6	20551	4
KESYSIYVYK	0	Q16778	H2B2E_HUMAN	35	34	4NFT	Structure	3:A	21	VLKQVHPDTGISSK	2	Q16778	H2B2E_HUMAN	47	44	4NFT	Structure	15:A	126	23.26	Intra	3	1	6	16547	4
LAHYNKR	5	Q16778	H2B2E_HUMAN	86	80	4NFT	Structure	54:B	1868	KESYSIYVYK	0	Q16778	H2B2E_HUMAN	35	34	4NFT	Structure	3:B	1455	30.52	Intra	8	1	6	14162	5
KGNYAER	0	Q96KK5	H2A1H_HUMAN	37	36	Q96KK5	Phyre	37:A	268	ESYSIYVYKVLK	8	Q16778	H2B2E_HUMAN	44	35	4NFT	Structure	12:A	102	####	1	2	1	2	23566	4
KGNYAER	0	Q96KK5	H2A1H_HUMAN	37	36	Q96KK5	Phyre	37:A	268	KESYSIYVYKVLK	9	Q16778	H2B2E_HUMAN	44	34	4NFT	Structure	12:A	102	####	1	4	1	2	19510	4
ADVKGGTLTQYEGK	3	Q16851	UGPA_HUMAN	291	287	3R3I	Structure	280:B	5332	LGSSFTKVQDYLR	6	Q16851	UGPA_HUMAN	438	431	3R3I	Structure	427:B	6433	24.8	Intra	3	1	6	23170	4
INKESLLPVAK	2	Q16851	UGPA_HUMAN	198	195	3R3I	Structure	187:B	4732	LGSSFTKVQDYLR	6	Q16851	UGPA_HUMAN	438	431	3R3I	Structure	427:B	6433	31.32	Intra	1	1	6	26993	4
IQRPPEDSIQPYEKIK	13	Q16851	UGPA_HUMAN	91	77	3R3I	Structure	80:D	10575	FKIFNTNNLWISLAAVK	1	Q16851	UGPA_HUMAN	325	323	3R3I	Structure	314:D	12259	17.98	Intra	1	1	6	31783	5
LGSSFTKVQDYLR	6	Q16851	UGPA_HUMAN	438	431	3R3I	Structure	427:D	13105	LGSSFTKVQDYLR	6	Q16851	UGPA_HUMAN	438	431	3R3I	Structure	427:A	2962	31.58	1	5	1	6	28075	4
LNGGLGTSMGCKGPK	11	Q16851	UGPA_HUMAN	124	112	3R3I	Structure	113:A	664	LGSSFTKVQDYLR	6	Q16851	UGPA_HUMAN	438	431	3R3I	Structure	427:A	2962	10.32	Intra	4	1	6	22047	4
LNGGLGTSM[147.04]GCKGPK	11	Q16851	UGPA_HUMAN	124	112	3R3I	Structure	113:A	664	LGSSFTKVQDYLR	6	Q16851	UGPA_HUMAN	438	431	3R3I	Structure	427:A	2962	10.32	Intra	2	1	6	20786	4
NYGWKVEETVK	4	Q16881	TRXR1_HUMAN	239	234	3QFA	Structure	89:A	617	VEETVKHDWDR	5	Q16881	TRXR1_HUMAN	245	239	3QFA	Structure	95:A	665	15.82	1	2	1	1	17125	5
FYAVQKLAR	5	Q16891	MIC60_HUMAN	640	634	####		####	####	FYAVQKLAR	5	Q16891	MIC60_HUMAN	640	634	####		####	####	####	1	1	1	2	21935	4
GMSVSDLADKLSTDDLNSLIAHAHR	9	Q16891	MIC60_HUMAN	395	385	####		####	####	GMSVSDLADKLSTDDLNSLIAHAHR	9	Q16891	MIC60_HUMAN	395	385	####		####	####	####	1	1	1	2	40801	6
LKVTELR	1	Q1KMD3	HNRL2_HUMAN	7	5	####		####	####	GLKVDLAQR	2	Q1KMD3	HNRL2_HUMAN	26	23	####		####	####	####	Intra	7	1	2	19689	4
YKEEAR	1	Q1KMD3	HNRL2_HUMAN	626	624	####		####	####	LLLFKTFSR	4	Q1KMD3	HNRL2_HUMAN	553	548	####		####	####	####	Intra	2	1	2	23149	4
LLAKLFGSK	3	Q29RF7	PDS5A_HUMAN	308	304	Q29RF7	Phyre	308:A	2673	LESVKFASHCLMNHPDLAK	4	Q29RF7	PDS5A_HUMAN	345	340	Q29RF7	Phyre	345:A	3019	11.07	Intra	1	0.89	2	22357	5
QCLLKNISIR	4	Q29RF7	PDS5A_HUMAN	974	969	Q29RF7	Phyre	974:A	8737	ALNEMWKCQNMLR	6	Q29RF7	PDS5A_HUMAN	507	500	Q29RF7	Phyre	507:A	4562	20.55	Intra	1	0.97	2	25064	4
GLKSFR	2	Q2NL82	TSR1_HUMAN	507	504	Q2NL82	Phyre	507:A	2653	EDVLWFKPVELR	6	Q2NL82	TSR1_HUMAN	727	720	Q2NL82	Phyre	727:A	4444	12.43	Intra	2	1	1	27925	4
LAFSKVLR	4	Q2TAL8	QRIC1_HUMAN	649	644	####		####	####	YFLLKTVDQHMK	4	Q2TAL8	QRIC1_HUMAN	637	632	####		####	####	####	Intra	6	1	1	25239	5
FKNELER	1	Q2VIR3	IF2GL_HUMAN	70	68	Q2VIR3	Phyre	70:A	227	NITIKLGYANAK	4	Q2VIR3	IF2GL_HUMAN	80	75	Q2VIR3	Phyre	80:A	312	10.19	Intra	5	1	6	19673	4
FKNELER	1	Q2VIR3	IF2GL_HUMAN	70	68	Q2VIR3	Phyre	70:A	227	STVVKAISGVHTVR	4	Q2VIR3	IF2GL_HUMAN	59	54	Q2VIR3	Phyre	59:A	142	18.91	Intra	1	1	6	16130	5
KIPVPPR	0	Q2VIR3	IF2GL_HUMAN	242	241	Q2VIR3	Phyre	242:A	1562	LKHILILQNK	1	Q2VIR3	IF2GL_HUMAN	183	181	Q2VIR3	Phyre	183:A	1088	9.8	Intra	1	1	6	18471	5
NITIKLGYANAK	4	Q2VIR3	IF2GL_HUMAN	80	75	Q2VIR3	Phyre	80:A	312	STVVKAISGVHTVR	4	Q2VIR3	IF2GL_HUMAN	59	54	Q2VIR3	Phyre	59:A	142	16.27	Intra	3	1	6	20016	4
RVEKHWR	3	Q2VIR3	IF2GL_HUMAN	449	445	Q2VIR3	Phyre	449:A	3112	NITIKLGYANAK	4	Q2VIR3	IF2GL_HUMAN	80	75	Q2VIR3	Phyre	80:A	312	19.25	Intra	7	1	6	15611	4
VEKHWR	2	Q2VIR3	IF2GL_HUMAN	449	446	Q2VIR3	Phyre	449:A	3112	NITIKLGYANAK	4	Q2VIR3	IF2GL_HUMAN	80	75	Q2VIR3	Phyre	80:A	312	19.25	Intra	4	1	6	17054	4
ELKEWAR	2	Q4G176	ACSF3_HUMAN	534	531	Q4G176	Phyre	534:A	3850	ELKEWAR	2	Q4G176	ACSF3_HUMAN	534	531	Q4G176	Phyre	534:A	3850	####	N/A	1	0.79	1	13638	4
SSTITVDQMKR	9	Q53EL6	PDCD4_HUMAN	402	392	3EIJ	Structure	402:A	1776	MILDLLKSLWK	6	Q53EL6	PDCD4_HUMAN	388	381	3EIJ	Structure	388:A	1664	13.4	Intra	2	1	1	38179	4
IIQKVFASR	3	Q5T4S7	UBR4_HUMAN	3820	3816	####		####	####	AVSNINTLLDKADR	10	Q5T4S7	UBR4_HUMAN	3745	3734	####		####	####	####	Intra	2	1	1	24758	4
FYSFYKQATEGPCK	5	Q5T8D3	ACBD5_HUMAN	76	70	3FLV	Structure	40:A	305	YKWDAWSSLGDMTK	1	Q5T8D3	ACBD5_HUMAN	98	96	3FLV	Structure	62:A	478	9.9	Intra	3	1	1	28490	4
DVAVKR	4	Q5TCZ1	SPD2A_HUMAN	92	87	####		####	####	IIPFLPGKILFR	7	Q5TCZ1	SPD2A_HUMAN	78	70	####		####	####	####	Intra	3	1	1	32761	4
SLMNNSKEEMR	6	Q5VYK3	ECM29_HUMAN	706	699	####		####	####	KGAAFGFNVIATR	0	Q5VYK3	ECM29_HUMAN	1099	1098	Q5VYK3	Phyre	1099:A	1514	####	Intra	2	1	2	22152	4
SLM[147.04]NNSKEEMR	6	Q5VYK3	ECM29_HUMAN	706	699	####		####	####	KGAAFGFNVIATR	0	Q5VYK3	ECM29_HUMAN	1099	1098	Q5VYK3	Phyre	1099:A	1514	####	Intra	1	1	2	20652	4
NTLKPSPQAWLQLVK	3	Q63HN8	RN213_HUMAN	3876	3872	####		####	####	VPELQGLVTEHVFLLDKCLR	16	Q63HN8	RN213_HUMAN	3957	3940	####		####	####	####	Intra	2	1	2	36742	5
SLYVKR	4	Q63HN8	RN213_HUMAN	2003	1998	####		####	####	SLYVKR	4	Q63HN8	RN213_HUMAN	2003	1998	####		####	####	####	1	1	0.79	2	18598	4
NIQDGSKLSTLLNHNNDTEEEER	6	Q6KC79	NIPBL_HUMAN	1278	1271	Q6KC79	Phyre	1278:A	627	VIQYTKFHLQNTLYPQYDPVYR	5	Q6KC79	NIPBL_HUMAN	1341	1335	Q6KC79	Phyre	1341:A	1149	12.99	Intra	1	0.89	1	25775	5
KEVESR	0	Q6NYC8	PPR18_HUMAN	217	216	####		####	####	LSEAWKWR	5	Q6NYC8	PPR18_HUMAN	191	185	####		####	####	####	Intra	2	1	1	16580	4
ALAIYKQVLR	5	Q6PD62	CTR9_HUMAN	637	631	Q6PD62	Phyre	637:A	4717	NFSKNIFAILQSVK	3	Q6P1J9	CDC73_HUMAN	247	243	5YDE	Structure	####	####	####	1	1	0.8	1	37116	4
KILALR	0	Q6P1N0	C2D1A_HUMAN	861	860	####		####	####	DAAKEALYR	3	Q6P1N0	C2D1A_HUMAN	933	929	####		####	####	####	Intra	1	0.95	1	19365	4
ATKFFQSTK	2	Q6P2Q9	PRP8_HUMAN	480	477	Q6P2Q9	Phyre	480:A	3798	VYLGALKYMPHAVLK	6	Q6P2Q9	PRP8_HUMAN	93	86	Q6P2Q9	Phyre	93:A	522	19.27	Intra	1	1	4	25205	5
EAYSVKSR	5	Q6P2Q9	PRP8_HUMAN	853	847	Q6P2Q9	Phyre	853:A	6900	LGQLAKWK	5	Q6P2Q9	PRP8_HUMAN	1838	1832	Q6P2Q9	Phyre	1838:A	15065	31.57	Intra	2	1	4	16350	4
GATVDKTVCK	5	Q6P2Q9	PRP8_HUMAN	769	763	Q6P2Q9	Phyre	769:A	6204	IVNKWNTALIGLMTYFR	3	Q6P2Q9	PRP8_HUMAN	1262	1258	Q6P2Q9	Phyre	1262:A	10303	17.48	Intra	3	1	4	37804	4
LKEAYSVK	1	Q6P2Q9	PRP8_HUMAN	847	845	Q6P2Q9	Phyre	847:A	6852	LGQLAKWK	5	Q6P2Q9	PRP8_HUMAN	1838	1832	Q6P2Q9	Phyre	1838:A	15065	29.74	Intra	2	1	4	17361	4
KEDYVPALK	0	Q6PGP7	TTC37_HUMAN	662	661	Q6PGP7	Phyre	662:A	5277	ASAGTAKWAWLR	6	Q6PGP7	TTC37_HUMAN	564	557	Q6PGP7	Phyre	564:A	4493	30.39	Intra	1	0.86	2	25120	4
KSLQLASQR	0	Q6PGP7	TTC37_HUMAN	1425	1424	####		####	####	GSWSGKLSSLLR	5	Q6PGP7	TTC37_HUMAN	1439	1433	####		####	####	####	Intra	2	1	2	24933	4
KFDGVEGPR	0	Q6PKG0	LARP1_HUMAN	367	366	####		####	####	KMDADGFLPITLIASFHR	0	Q6PKG0	LARP1_HUMAN	429	428	####		####	####	####	Intra	1	1	1	33454	5
IKLYWSK	1	Q6YHK3	CD109_HUMAN	560	558	Q6YHK3	Phyre	560:A	4096	IPVQLVFKNK	7	Q6YHK3	CD109_HUMAN	556	548	Q6YHK3	Phyre	556:A	4062	12.45	Intra	2	1	3	25324	4
IKLYWSK	1	Q6YHK3	CD109_HUMAN	560	558	Q6YHK3	Phyre	560:A	4096	TRDENIKVGSPFELVVSGNK	6	Q6YHK3	CD109_HUMAN	478	471	Q6YHK3	Phyre	478:A	3454	19.72	Intra	2	1	3	26098	5
VKAEPSEK	1	Q6YHK3	CD109_HUMAN	567	565	Q6YHK3	Phyre	567:A	4161	IKLYWSK	1	Q6YHK3	CD109_HUMAN	560	558	Q6YHK3	Phyre	560:A	4096	20.13	Intra	4	1	3	17653	4
DSKVGKFVPK	5	Q6ZRV2	FA83H_HUMAN	1166	1160	####		####	####	DSKVGKFVPK	5	Q6ZRV2	FA83H_HUMAN	1166	1160	####		####	####	####	N/A	1	0.79	1	18156	4
GDVVPKDVNAAIATIK	5	Q71U36	TBA1A_HUMAN	326	320	5JCO	Structure	326:A	29217	KLADQCTGLQGFLVFHSFGGGTGSGFTSLLMER	0	Q71U36	TBA1A_HUMAN	124	123	5JCO	Structure	124:A	27646	44.84	Intra	2	1	5	37323	5
LSVDYGKK	6	Q71U36	TBA1A_HUMAN	163	156	5JCO	Structure	163:A	27933	HGKYMACCLLYR	2	Q71U36	TBA1A_HUMAN	311	308	5JCO	Structure	311:A	29099	30.72	Intra	3	1	5	17923	4
LSVDYGKK	6	Q71U36	TBA1A_HUMAN	163	156	5JCO	Structure	163:A	27933	HGKYM[147.04]ACCLLYR	2	Q71U36	TBA1A_HUMAN	311	308	5JCO	Structure	311:A	29099	30.72	Intra	1	1	5	16544	5
LSVDYGKK	6	Q71U36	TBA1A_HUMAN	163	156	5JCO	Structure	163:A	27933	KLADQCTGLQGFLVFHSFGGGTGSGFTSLLMER	0	Q71U36	TBA1A_HUMAN	124	123	5JCO	Structure	124:A	27646	17.93	Intra	1	1	5	33955	5
VGINYQPPTVVPGGDLAKVQR	17	Q71U36	TBA1A_HUMAN	370	352	5JCO	Structure	370:A	29547	KLADQCTGLQGFLVFHSFGGGTGSGFTSLLMER	0	Q71U36	TBA1A_HUMAN	124	123	5JCO	Structure	124:A	27646	38.21	Intra	1	1	5	36029	5
GQQIGKVVQVYR	5	Q9UNX3	RL26L_HUMAN	69	63	Q9UNX3	Phyre	69:A	562	HGKYMACCLLYR	2	Q71U36	TBA1A_HUMAN	311	308	5JCO	Structure	311:A	29099	####	2	2	1	1	22897	4
LKLYLPK	1	Q7KZF4	SND1_HUMAN	541	539	3BDL	Structure	516:A	1593	KLRPLYDIPYMFEAR	0	Q7KZF4	SND1_HUMAN	389	388	3BDL	Structure	364:A	396	18.09	Intra	4	1	3	30588	4
LKLYLPK	1	Q7KZF4	SND1_HUMAN	541	539	3BDL	Structure	516:A	1593	LEGENTQDKNKK	10	Q7KZF4	SND1_HUMAN	388	377	3BDL	Structure	363:A	387	20.5	Intra	2	1	3	16824	5
LKLYLPK	1	Q7KZF4	SND1_HUMAN	541	539	3BDL	Structure	516:A	1593	LEGENTQDKNKK	8	Q7KZF4	SND1_HUMAN	386	377	3BDL	Structure	361:A	370	22.32	Intra	2	1	3	16793	5
WKVTSK	1	Q7L014	DDX46_HUMAN	948	946	####		####	####	LQNSYQPTNKGR	9	Q7L014	DDX46_HUMAN	1025	1015	####		####	####	####	Intra	2	1	1	12219	4
EGVSAAFAVKLFK	9	Q7L1Q6	BZW1_HUMAN	188	178	Q7L1Q6	Phyre	188:A	1032	LMELFPANKQSVEHFTK	8	Q7L1Q6	BZW1_HUMAN	223	214	Q7L1Q6	Phyre	223:A	1299	16.65	Intra	1	1	2	29613	4
KVSMDNR	0	Q7L1Q6	BZW1_HUMAN	208	207	Q7L1Q6	Phyre	208:A	1194	SWINEKDINAVAASLR	5	Q7L1Q6	BZW1_HUMAN	197	191	Q7L1Q6	Phyre	197:A	1114	15.79	Intra	1	1	2	24584	4
KWISDWNLTTEK	0	Q7L2H7	EIF3M_HUMAN	149	148	Q7L2H7	Phyre	149:A	1119	LQLLSNLFHGMDKNTPVR	12	Q7L2H7	EIF3M_HUMAN	115	102	Q7L2H7	Phyre	115:A	854	13.19	Intra	4	1	1	30858	4
KMNTIQCR	0	Q7Z4Q2	HEAT3_HUMAN	458	457	Q7Z4Q2	Phyre	458:A	2463	NPTWKPLIR	4	Q7Z4Q2	HEAT3_HUMAN	453	448	Q7Z4Q2	Phyre	453:A	2420	10.01	Intra	2	1	1	19103	4
HVLDTLIQLAKVFPSHFTQQR	10	Q7Z6Z7	HUWE1_HUMAN	3345	3334	####		####	####	TPKLSSIIDCTGTASYHGFLPVLVR	2	Q7Z6Z7	HUWE1_HUMAN	342	339	####		####	####	####	Intra	1	1	3	39564	6
SSLLTEKLLR	6	Q7Z6Z7	HUWE1_HUMAN	3452	3445	####		####	####	HVLDTLIQLAKVFPSHFTQQR	10	Q7Z6Z7	HUWE1_HUMAN	3345	3334	####		####	####	####	Intra	4	1	3	37424	5
SSLLTEKLLR	6	Q7Z6Z7	HUWE1_HUMAN	3452	3445	####		####	####	TPKLSSIIDCTGTASYHGFLPVLVR	2	Q7Z6Z7	HUWE1_HUMAN	342	339	####		####	####	####	Intra	4	1	3	33224	5
WASAKLER	4	Q86TG7	PEG10_HUMAN	136	131	####		####	####	LTQEEKER	5	Q86TG7	PEG10_HUMAN	286	280	####		####	####	####	Intra	1	0.97	1	12690	4
KFLEK	0	Q86U86	PB1_HUMAN	1011	1010	Q86U86	Phyre	1011:A	531	EYFKLCPENFR	3	Q86U86	PB1_HUMAN	1045	1041	Q86U86	Phyre	1045:A	820	20.5	Intra	2	1	1	22090	4
FKSYLLSMGIANPVTR	1	Q86VN1	VPS36_HUMAN	218	216	2ZME	Structure	218:B	2089	ETYGSGTQYHMQLAKQLAGILQVPLEER	14	Q86VN1	VPS36_HUMAN	247	232	2ZME	Structure	247:B	2313	18.74	Intra	1	1	1	37106	5
DLFTCTIKR	7	Q86VP6	CAND1_HUMAN	574	566	1U6G	Structure	574:C	10604	LKAADIDQEVK	1	Q86VP6	CAND1_HUMAN	577	575	1U6G	Structure	577:C	10632	5.37	Intra	2	1	3	22418	4
LKGYLISGSSYAR	1	Q86VP6	CAND1_HUMAN	971	969	1U6G	Structure	971:C	13595	EIISSASVVGLKPYVENIWALLLKHCECAEEGTR	23	Q86VP6	CAND1_HUMAN	938	914	1U6G	Structure	938:C	13343	17.06	Intra	1	1	3	38768	5
LKGYLISGSSYAR	1	Q86VP6	CAND1_HUMAN	971	969	1U6G	Structure	971:C	13595	FTISDHPQPIDPLLKNCIGDFLK	14	Q86VP6	CAND1_HUMAN	1005	990	1U6G	Structure	1005:C	13852	13.01	Intra	1	1	3	31001	4
KSDPER	0	Q86XL3	ANKL2_HUMAN	555	554	Q86XL3	Phyre	555:A	####	LWKTPPR	2	Q86XL3	ANKL2_HUMAN	540	537	Q86XL3	Phyre	540:A	####	####	Intra	1	0.97	1	12843	4
ASDGFPVYQEKIIR	10	Q8IV38	ANKY2_HUMAN	265	254	####		####	####	MHYISCIFQKCINFLK	9	Q8IV38	ANKY2_HUMAN	231	221	####		####	####	####	Intra	1	1	1	29338	4
VQATKPQASR	4	Q8IY81	SPB1_HUMAN	182	177	Q8IY81	Phyre	182:A	1275	SAFKLIQLNR	3	Q8IY81	SPB1_HUMAN	31	27	Q8IY81	Phyre	31:A	68	8.58	Intra	3	1	1	19535	4
[truncated: 207 more rows]

## Sheet: rep1
probability	spectrum	xlink_type	kojak_score	delta_score	e-value	ppm_error	ions	peptide	protein	num_prots	calc_neutral_pep_mass
1	072419_HeLa_invitro_H_RNAse_L_control_frac10_r1.03896.03896.1	xl	8.20E-05(1.0000+0.9999)	intra:1_nsx:1	-	-3.2969	/	K.AEGAQNQGK[333.14]K[136.11].V(2)+K.K[136.11]AEGAQNQGK[333.14]K[136.11].V(2)	sp|Q9P2E9|RRBP1_HUMAN+sp|Q9P2E9|RRBP1_HUMAN	1	1000
0.9987	072419_HeLa_invitro_H_RNAse_L_control_frac10_r1.04634.04634.1	xl	6.48E+00(0.7244+0.7244)	homopeptide:1	-	0.4653	/	K.GQGK[325.13]SR.L(2)+K.GQGK[325.13]SR.L(2)	sp|P08670|VIME_HUMAN+sp|P08670|VIME_HUMAN	1	1000
1	072419_HeLa_invitro_H_RNAse_L_control_frac10_r1.05292.05292.1	xl	7.24E+00(0.6642+0.9964)	intra:1_nsx:1	-	1.1371	/	K.SAPAPK[325.13]K.G(2)+K.KAVTK[325.13]AQK.K(2)	sp|O60814|H2B1K_HUMAN,sp|Q16778|H2B2E_HUMAN+sp|O60814|H2B1K_HUMAN,sp|Q16778|H2B2E_HUMAN	1	1000
1	072419_HeLa_invitro_H_RNAse_L_control_frac10_r1.05360.05360.1	xl	8.26E+00(0.4319+0.9871)	intra:1_nsx:1	-	-0.2858	/	K.SAPAPK[333.14]K[136.11].G(2)+K.K[136.11]AVTK[333.14]AQK[136.11].K(2)	sp|O60814|H2B1K_HUMAN,sp|Q16778|H2B2E_HUMAN+sp|O60814|H2B1K_HUMAN,sp|Q16778|H2B2E_HUMAN	1	1000
0.9996	072419_HeLa_invitro_H_RNAse_L_control_frac10_r1.05681.05681.2	xl	4.26E-01(0.1620+0.9929)	intra:1_nsx:0	-	2.4505	/	K.RQEQIAK[325.13]R.R(2)+R.ASTSK[325.13]SESSQK.-(2)	sp|P62753|RS6_HUMAN+sp|P62753|RS6_HUMAN	1	1000
0.9997	072419_HeLa_invitro_H_RNAse_L_control_frac10_r1.05686.05686.1	xl	9.81E-01(0.5130+0.8857)	intra:1_nsx:0	-	4.4237	/	K.RQEQIAK[325.13]R.R(2)+R.ASTSK[325.13]SESSQK.-(2)	sp|P62753|RS6_HUMAN+sp|P62753|RS6_HUMAN	1	1000
1	072419_HeLa_invitro_H_RNAse_L_control_frac10_r1.06234.06234.1	xl	2.56E+00(0.6709+1.0000)	intra:0_nsx:1	-	3.3406	/	R.TK[325.13]QTAR.K(2)+K.HAVSEGTK[325.13]AVTK.Y(2)	sp|P68431|H31_HUMAN,sp|Q71DI3|H32_HUMAN+sp|O60814|H2B1K_HUMAN,sp|Q16778|H2B2E_HUMAN	2	1000
1	072419_HeLa_invitro_H_RNAse_L_control_frac10_r1.06238.06238.1	xl	5.13E-01(0.9035+1.0000)	intra:0_nsx:1	-	-1.0396	/	R.TK[325.13]QTAR.K(2)+K.HAVSEGTK[325.13]AVTK.Y(2)	sp|P68431|H31_HUMAN,sp|Q71DI3|H32_HUMAN+sp|O60814|H2B1K_HUMAN,sp|Q16778|H2B2E_HUMAN	2	1000
0.9994	072419_HeLa_invitro_H_RNAse_L_control_frac10_r1.06279.06279.1	xl	2.21E+00(0.5670+1.0000)	intra:0_nsx:1	-	0.5698	/	R.TK[333.14]QTAR[162.12].K(2)+K.HAVSEGTK[333.14]AVTK[136.11].Y(2)	sp|P68431|H31_HUMAN,sp|Q71DI3|H32_HUMAN+sp|O60814|H2B1K_HUMAN,sp|Q16778|H2B2E_HUMAN	2	1000
1	072419_HeLa_invitro_H_RNAse_L_control_frac10_r1.06354.06354.1	xl	1.28E+00(0.8191+1.0000)	intra:1_nsx:1	-	0.5793	/	K.SGK[325.13]DLTKR.S(2)+R.SSQTQNK[325.13]ASR.K(2)	sp|Q01105|SET_HUMAN+sp|Q01105|SET_HUMAN	1	1000
1	072419_HeLa_invitro_H_RNAse_L_control_frac10_r1.06362.06362.1	xl	4.61E+00(0.6208+0.9997)	intra:1_nsx:1	-	0.2166	/	K.SGK[325.13]DLTKR.S(2)+R.SSQTQNK[325.13]ASR.K(2)	sp|Q01105|SET_HUMAN+sp|Q01105|SET_HUMAN	1	1000
1	072419_HeLa_invitro_H_RNAse_L_control_frac10_r1.06460.06460.1	xl	6.03E+00(0.5549+0.9998)	intra:1_nsx:1	-	-0.2012	/	K.SGK[325.13]DLTKR.S(2)+R.SSQTQNK[325.13]ASR.K(2)	sp|Q01105|SET_HUMAN+sp|Q01105|SET_HUMAN	1	1000
1	072419_HeLa_invitro_H_RNAse_L_control_frac10_r1.07686.07686.1	xl	9.13E-01(0.9970+1.0000)	intra:1_nsx:1	-	-1.4851	/	R.K[333.14]SAPATGGVK[136.11].K(2)+R.K[136.11]QLATK[333.14]AAR[162.12].K(2)	sp|P68431|H31_HUMAN,sp|Q71DI3|H32_HUMAN+sp|P68431|H31_HUMAN,sp|Q71DI3|H32_HUMAN	1	1000
1	072419_HeLa_invitro_H_RNAse_L_control_frac10_r1.08199.08199.1	xl	3.70E+00(0.6206+1.0000)	intra:1_nsx:1	-	-1.1924	/	K.K[333.14]EHPDR[162.12].F(2)+R.K[333.14]AYGQALAK[136.11].L(2)	sp|P29401|TKT_HUMAN+sp|P29401|TKT_HUMAN	1	1000
1	072419_HeLa_invitro_H_RNAse_L_control_frac10_r1.08203.08203.1	xl	5.96E-02(0.9988+1.0000)	intra:1_nsx:1	-	0.7301	/	K.K[325.13]EHPDR.F(2)+R.K[325.13]AYGQALAK.L(2)	sp|P29401|TKT_HUMAN+sp|P29401|TKT_HUMAN	1	1000
1	072419_HeLa_invitro_H_RNAse_L_control_frac10_r1.08209.08209.1	xl	1.34E-01(0.9971+1.0000)	intra:1_nsx:1	-	-1.0497	/	K.K[333.14]EHPDR[162.12].F(2)+R.K[333.14]AYGQALAK[136.11].L(2)	sp|P29401|TKT_HUMAN+sp|P29401|TKT_HUMAN	1	1000
1	072419_HeLa_invitro_H_RNAse_L_control_frac10_r1.08218.08218.1	xl	1.83E+00(0.9585+1.0000)	intra:1_nsx:1	-	2.0732	/	K.K[325.13]EHPDR.F(2)+R.K[325.13]AYGQALAK.L(2)	sp|P29401|TKT_HUMAN+sp|P29401|TKT_HUMAN	1	1000
1	072419_HeLa_invitro_H_RNAse_L_control_frac10_r1.08301.08301.2	xl	5.68E-01(0.9395+1.0000)	intra:1_nsx:1	-	-5.3022	/	K.K[333.14]EHPDR[162.12].F(2)+R.K[333.14]AYGQALAK[136.11].L(2)	sp|P29401|TKT_HUMAN+sp|P29401|TKT_HUMAN	1	1000
1	072419_HeLa_invitro_H_RNAse_L_control_frac10_r1.08308.08308.1	xl	7.41E-02(0.9985+1.0000)	intra:1_nsx:1	-	-2.8267	/	K.K[325.13]EHPDR.F(2)+R.K[325.13]AYGQALAK.L(2)	sp|P29401|TKT_HUMAN+sp|P29401|TKT_HUMAN	1	1000
1	072419_HeLa_invitro_H_RNAse_L_control_frac10_r1.08314.08314.2	xl	8.99E-02(0.9945+1.0000)	intra:1_nsx:1	-	-350.765	/	K.K[333.14]EHPDR[162.12].F(2)+R.K[333.14]AYGQALAK[136.11].L(2)	sp|P29401|TKT_HUMAN+sp|P29401|TKT_HUMAN	1	1000
1	072419_HeLa_invitro_H_RNAse_L_control_frac10_r1.08322.08322.1	xl	2.31E-01(0.9948+1.0000)	intra:1_nsx:1	-	8.7045	/	K.K[325.13]EHPDR.F(2)+R.K[325.13]AYGQALAK.L(2)	sp|P29401|TKT_HUMAN+sp|P29401|TKT_HUMAN	1	1000
0.9418	072419_HeLa_invitro_H_RNAse_L_control_frac10_r1.08358.08358.1	xl	2.33E-01(0.9976+0.9984)	intra:0_nsx:0	-	2.3339	/	K.AVTK[333.14]YTSSK[136.11].-(2)+R.K[136.11]QLATK[333.14]AAR[162.12].K(2)	sp|Q16778|H2B2E_HUMAN+sp|P68431|H31_HUMAN,sp|Q71DI3|H32_HUMAN	2	1000
0.9997	072419_HeLa_invitro_H_RNAse_L_control_frac10_r1.08918.08918.2	xl	6.40E-03(0.9999+1.0000)	intra:0_nsx:1	-	1.0705	/	K.HAVSEGTK[325.13]AVTK.Y(2)+R.DAVTYTEHAK[325.13]R.K(2)	sp|O60814|H2B1K_HUMAN,sp|Q16778|H2B2E_HUMAN+sp|P62805|H4_HUMAN	2	1000
1	072419_HeLa_invitro_H_RNAse_L_control_frac10_r1.09024.09024.1	xl	1.44E-02(0.9999+1.0000)	intra:1_nsx:1	-	0.8389	/	K.VK[333.14]AEPAK[136.11].L(2)+R.FHVEEEGK[333.14]GK[136.11].D(2)	sp|P00558|PGK1_HUMAN+sp|P00558|PGK1_HUMAN	1	1000
1	072419_HeLa_invitro_H_RNAse_L_control_frac10_r1.09038.09038.1	xl	2.64E-01(0.9982+0.9999)	intra:1_nsx:1	-	0.878	/	K.VK[325.13]AEPAK.L(2)+R.FHVEEEGK[325.13]GK.D(2)	sp|P00558|PGK1_HUMAN+sp|P00558|PGK1_HUMAN	1	1000
1	072419_HeLa_invitro_H_RNAse_L_control_frac10_r1.09054.09054.1	xl	9.38E-02(0.9965+1.0000)	intra:1_nsx:1	-	0.1497	/	K.VK[333.14]AEPAK[136.11].L(2)+R.FHVEEEGK[333.14]GK[136.11].D(2)	sp|P00558|PGK1_HUMAN+sp|P00558|PGK1_HUMAN	1	1000
1	072419_HeLa_invitro_H_RNAse_L_control_frac10_r1.09069.09069.1	xl	8.80E-01(0.9944+0.9804)	intra:1_nsx:1	-	4.0161	/	R.LK[325.13]EYHR.L(2)+R.LQSK[325.13]VTAK.-(2)	sp|P00966|ASSY_HUMAN+sp|P00966|ASSY_HUMAN	1	1000
1	072419_HeLa_invitro_H_RNAse_L_control_frac10_r1.09296.09296.1	xl	1.50E-01(0.9985+1.0000)	intra:1_nsx:1	-	1.2479	/	K.DASGNK[333.14]VK[136.11].A(2)+R.FHVEEEGK[333.14]GK[136.11].D(2)	sp|P00558|PGK1_HUMAN+sp|P00558|PGK1_HUMAN	1	1000
1	072419_HeLa_invitro_H_RNAse_L_control_frac10_r1.09300.09300.1	xl	2.31E-01(0.9982+1.0000)	intra:1_nsx:1	-	1.7093	/	K.DASGNK[325.13]VK.A(2)+R.FHVEEEGK[325.13]GK.D(2)	sp|P00558|PGK1_HUMAN+sp|P00558|PGK1_HUMAN	1	1000
1	072419_HeLa_invitro_H_RNAse_L_control_frac10_r1.09306.09306.1	xl	3.00E+00(0.9707+1.0000)	intra:1_nsx:1	-	1.4726	/	K.DASGNK[333.14]VK[136.11].A(2)+R.FHVEEEGK[333.14]GK[136.11].D(2)	sp|P00558|PGK1_HUMAN+sp|P00558|PGK1_HUMAN	1	1000
1	072419_HeLa_invitro_H_RNAse_L_control_frac10_r1.09325.09325.1	xl	9.85E-02(0.9425+1.0000)	intra:1_nsx:1	-	-3.0335	/	K.YDDIK[333.14]K[136.11].V(2)+K.FHGTVK[333.14]AENGK[136.11].L(2)	sp|P04406|G3P_HUMAN+sp|P04406|G3P_HUMAN	1	1000
1	072419_HeLa_invitro_H_RNAse_L_control_frac10_r1.09393.09393.1	xl	1.28E+00(0.9118+1.0000)	intra:1_nsx:1	-	2.0995	/	K.YDDIK[325.13]K.V(2)+K.FHGTVK[325.13]AENGK.L(2)	sp|P04406|G3P_HUMAN+sp|P04406|G3P_HUMAN	1	1000
0.9991	072419_HeLa_invitro_H_RNAse_L_control_frac10_r1.09410.09410.1	xl	3.12E-02(0.9968+1.0000)	intra:0_nsx:0	-	8.738	/	R.TK[325.13]TPGPGAQSALR.A(2)+R.K[325.13]TSYAQHQQVR.Q(2)	sp|P62263|RS14_HUMAN+sp|P61247|RS3A_HUMAN	2	1000
0.9036	072419_HeLa_invitro_H_RNAse_L_control_frac10_r1.09442.09442.1	xl	1.16E-02(0.9934+1.0000)	intra:0_nsx:0	-	7.0324	/	R.TK[333.14]TPGPGAQSALR[162.12].A(2)+R.K[333.14]TSYAQHQQVR[162.12].Q(2)	sp|P62263|RS14_HUMAN+sp|P61247|RS3A_HUMAN	2	1000
1	072419_HeLa_invitro_H_RNAse_L_control_frac10_r1.09504.09504.1	xl	3.10E+00(0.8530+1.0000)	intra:1_nsx:1	-	1.4752	/	R.VVEPK[333.14]R[162.12].A(2)+R.EESGK[333.14]PGAHVTVK[136.11].K(2)	sp|P22626|ROA2_HUMAN,sp|P09651|ROA1_HUMAN,sp|P51991|ROA3_HUMAN+sp|P22626|ROA2_HUMAN	1	1000
1	072419_HeLa_invitro_H_RNAse_L_control_frac10_r1.09509.09509.1	xl	1.38E+00(0.8647+1.0000)	intra:1_nsx:1	-	6.9815	/	R.VVEPK[325.13]R.A(2)+R.EESGK[325.13]PGAHVTVK.K(2)	sp|P22626|ROA2_HUMAN,sp|P09651|ROA1_HUMAN,sp|P51991|ROA3_HUMAN+sp|P22626|ROA2_HUMAN	1	1000
1	072419_HeLa_invitro_H_RNAse_L_control_frac10_r1.09768.09768.1	xl	3.72E+00(0.8162+0.0058)	intra:1_nsx:1	-	7.3234	/	K.YDDIK[325.13]K.V(2)+K.FHGTVK[325.13]AENGK.L(2)	sp|P04406|G3P_HUMAN+sp|P04406|G3P_HUMAN	1	1000
0.9984	072419_HeLa_invitro_H_RNAse_L_control_frac10_r1.10002.10002.1	xl	7.43E+00(0.4770+0.9980)	intra:0_nsx:1	-	2.0132	/	R.TK[325.13]QTAR.K(2)+K.VLK[325.13]QVHPDTGISSK.A(2)	sp|P68431|H31_HUMAN,sp|Q71DI3|H32_HUMAN+sp|O60814|H2B1K_HUMAN,sp|Q16778|H2B2E_HUMAN	2	1000
1	072419_HeLa_invitro_H_RNAse_L_control_frac10_r1.10125.10125.1	xl	1.60E-01(0.9852+0.9988)	intra:1_nsx:1	-	0.8461	/	K.AK[333.14]K[136.11]PALVAK[136.11].S(2)+R.LAQYESK[333.14]K[136.11].A(2)	sp|P24534|EF1B_HUMAN,sp|P29692|EF1D_HUMAN+sp|P24534|EF1B_HUMAN	1	1000
1	072419_HeLa_invitro_H_RNAse_L_control_frac10_r1.10324.10324.1	xl	6.34E-02(0.9897+0.9999)	intra:1_nsx:1	-	4.3991	/	R.K[333.14]IQSLGDSK[136.11].T(2)+R.YAHEK[333.14]LNASR[162.12].G(2)	sp|P49588|SYAC_HUMAN+sp|P49588|SYAC_HUMAN	1	1000
1	072419_HeLa_invitro_H_RNAse_L_control_frac10_r1.10338.10338.1	xl	1.67E-01(0.9777+1.0000)	intra:1_nsx:1	-	0.7055	/	R.K[325.13]IQSLGDSK.T(2)+R.YAHEK[325.13]LNASR.G(2)	sp|P49588|SYAC_HUMAN+sp|P49588|SYAC_HUMAN	1	1000
1	072419_HeLa_invitro_H_RNAse_L_control_frac10_r1.10445.10445.1	xl	1.67E-02(1.0000+1.0000)	intra:1_nsx:1	-	0.506	/	K.YK[333.14]NIGAK[136.11].L(2)+K.DK[136.11]YK[333.14]NIGAK[136.11].L(2)	sp|P10809|CH60_HUMAN+sp|P10809|CH60_HUMAN	1	1000
1	072419_HeLa_invitro_H_RNAse_L_control_frac10_r1.10446.10446.1	xl	1.05E-02(0.9999+1.0000)	intra:1_nsx:1	-	0.1684	/	K.YK[325.13]NIGAK.L(2)+K.DKYK[325.13]NIGAK.L(2)	sp|P10809|CH60_HUMAN+sp|P10809|CH60_HUMAN	1	1000
1	072419_HeLa_invitro_H_RNAse_L_control_frac10_r1.10467.10467.1	xl	1.11E-02(0.9999+1.0000)	intra:1_nsx:1	-	2.3231	/	K.YK[325.13]NIGAK.L(2)+K.DKYK[325.13]NIGAK.L(2)	sp|P10809|CH60_HUMAN+sp|P10809|CH60_HUMAN	1	1000
1	072419_HeLa_invitro_H_RNAse_L_control_frac10_r1.10551.10551.1	xl	1.20E-03(1.0000+1.0000)	intra:1_nsx:1	-	-1.6586	/	K.VVK[333.14]QASEGPLK[136.11].G(2)+K.FHGTVK[333.14]AENGK[136.11].L(2)	sp|P04406|G3P_HUMAN+sp|P04406|G3P_HUMAN	1	1000
1	072419_HeLa_invitro_H_RNAse_L_control_frac10_r1.10597.10597.1	xl	2.61E-04(1.0000+1.0000)	intra:1_nsx:1	-	-2.6052	/	K.VVK[333.14]QASEGPLK[136.11].G(2)+K.FHGTVK[333.14]AENGK[136.11].L(2)	sp|P04406|G3P_HUMAN+sp|P04406|G3P_HUMAN	1	1000
0.9998	072419_HeLa_invitro_H_RNAse_L_control_frac10_r1.10823.10823.1	xl	7.52E+00(0.6539+0.0997)	intra:1_nsx:0	-	2.0483	/	K.K[325.13]FGGPGAR.A(2)+R.YQK[325.13]SYR.-(2)	sp|P62249|RS16_HUMAN+sp|P62249|RS16_HUMAN	1	1000
1	072419_HeLa_invitro_H_RNAse_L_control_frac10_r1.11077.11077.1	xl	8.09E-01(1.0000+0.0058)	intra:1_nsx:1	-	2.6875	/	K.VVK[325.13]QASEGPLK.G(2)+K.FHGTVK[325.13]AENGK.L(2)	sp|P04406|G3P_HUMAN+sp|P04406|G3P_HUMAN	1	1000
1	072419_HeLa_invitro_H_RNAse_L_control_frac10_r1.11218.11218.1	xl	2.94E-03(0.9999+1.0000)	intra:1_nsx:1	-	2.0205	/	K.SGFNSK[325.13]SGQR.G(2)+K.YGK[325.13]IVGC[160.03]SVHK.G(2)	sp|P07910|HNRPC_HUMAN+sp|P07910|HNRPC_HUMAN	1	1000
1	072419_HeLa_invitro_H_RNAse_L_control_frac10_r1.11219.11219.1	xl	4.56E+00(0.7356+1.0000)	intra:1_nsx:1	-	3.0476	/	R.GK[325.13]SGFNSK.S(2)+K.YGK[325.13]IVGC[160.03]SVHK.G(2)	sp|P07910|HNRPC_HUMAN+sp|P07910|HNRPC_HUMAN	1	1000
1	072419_HeLa_invitro_H_RNAse_L_control_frac10_r1.11260.11260.1	xl	4.06E-03(1.0000+1.0000)	intra:1_nsx:1	-	-7.7172	/	K.SGFNSK[325.13]SGQR.G(2)+K.YGK[325.13]IVGC[160.03]SVHK.G(2)	sp|P07910|HNRPC_HUMAN+sp|P07910|HNRPC_HUMAN	1	1000
0.935	072419_HeLa_invitro_H_RNAse_L_control_frac10_r1.11298.11298.1	xl	4.67E+00(0.0032+1.0000)	intra:1_nsx:0	-	-0.2863	/	K.NSQK[333.14]IDR[162.12].L(2)+R.LDGAHAPELTK[333.14]K[136.11].V(2)	sp|O76003|GLRX3_HUMAN+sp|O76003|GLRX3_HUMAN	1	1000
0.8917	072419_HeLa_invitro_H_RNAse_L_control_frac10_r1.11357.11357.1	xl	8.82E-02(0.5930+1.0000)	intra:0_nsx:0	-	0.7695	/	K.VLK[325.13]GHVLTR.D(2)+R.LAQEEESEAK[325.13]R.L(2)	sp|Q14137|BOP1_HUMAN+sp|O00541|PESC_HUMAN	2	1000
1	072419_HeLa_invitro_H_RNAse_L_control_frac10_r1.11800.11800.1	xl	1.98E-02(0.9375+0.9375)	homopeptide:1	-	10.5574	/	R.EYTINIHK[325.13]R.L(2)+R.EYTINIHK[325.13]R.L(2)	sp|P62899|RL31_HUMAN+sp|P62899|RL31_HUMAN	1	1000
1	072419_HeLa_invitro_H_RNAse_L_control_frac10_r1.11800.11800.1	xl	9.82E-01(0.9957+1.0000)	intra:1_nsx:1	-	1.1349	/	R.NIGK[325.13]TLVTR.T(2)+R.K[325.13]TSYAQHQQVR.Q(2)	sp|P61247|RS3A_HUMAN+sp|P61247|RS3A_HUMAN	1	1000
1	072419_HeLa_invitro_H_RNAse_L_control_frac10_r1.11813.11813.1	xl	7.33E-02(0.9981+1.0000)	intra:1_nsx:1	-	0.3589	/	R.NIGK[333.14]TLVTR[162.12].T(2)+R.K[333.14]TSYAQHQQVR[162.12].Q(2)	sp|P61247|RS3A_HUMAN+sp|P61247|RS3A_HUMAN	1	1000
0.9929	072419_HeLa_invitro_H_RNAse_L_control_frac10_r1.11876.11876.1	xl	6.95E+00(0.7987+0.7987)	homopeptide:1	-	-4.6387	/	K.YNK[325.13]LR.Q(2)+K.YNK[325.13]LR.Q(2)	sp|Q01105|SET_HUMAN+sp|Q01105|SET_HUMAN	1	1000
1	072419_HeLa_invitro_H_RNAse_L_control_frac10_r1.12115.12115.1	xl	5.63E-02(0.9909+1.0000)	intra:1_nsx:1	-	0.6707	/	R.AVVPSK[325.13]R.Q(2)+K.YGK[325.13]IVGC[160.03]SVHK.G(2)	sp|P07910|HNRPC_HUMAN+sp|P07910|HNRPC_HUMAN	1	1000
1	072419_HeLa_invitro_H_RNAse_L_control_frac10_r1.12131.12131.1	xl	1.89E-01(0.9804+1.0000)	intra:1_nsx:1	-	0.5921	/	R.AVVPSK[333.14]R[162.12].Q(2)+K.YGK[333.14]IVGC[160.03]SVHK[136.11].G(2)	sp|P07910|HNRPC_HUMAN+sp|P07910|HNRPC_HUMAN	1	1000
1	072419_HeLa_invitro_H_RNAse_L_control_frac10_r1.12136.12136.1	xl	4.42E-01(0.9339+1.0000)	intra:1_nsx:1	-	0.0489	/	R.AVVPSK[325.13]R.Q(2)+K.YGK[325.13]IVGC[160.03]SVHK.G(2)	sp|P07910|HNRPC_HUMAN+sp|P07910|HNRPC_HUMAN	1	1000
1	072419_HeLa_invitro_H_RNAse_L_control_frac10_r1.12161.12161.1	xl	3.05E+00(0.5363+1.0000)	intra:1_nsx:1	-	1.0011	/	R.AVVPSK[333.14]R[162.12].Q(2)+K.YGK[333.14]IVGC[160.03]SVHK[136.11].G(2)	sp|P07910|HNRPC_HUMAN+sp|P07910|HNRPC_HUMAN	1	1000
0.9984	072419_HeLa_invitro_H_RNAse_L_control_frac10_r1.12213.12213.2	xl	5.00E+00(0.1670+1.0000)	intra:0_nsx:1	-	0.19	/	R.K[333.14]GNYAER[162.12].V(2)+R.SR[162.12]K[333.14]ESYSVYVYK[136.11].V(2)	sp|Q96KK5|H2A1H_HUMAN,sp|P0C0S8|H2A1_HUMAN,sp|Q6FI13|H2A2A_HUMAN+sp|O60814|H2B1K_HUMAN	2	1000
1	072419_HeLa_invitro_H_RNAse_L_control_frac10_r1.12224.12224.1	xl	2.15E-02(0.9973+1.0000)	intra:1_nsx:1	-	-0.0793	/	R.AVVPSK[325.13]R.Q(2)+K.YGK[325.13]IVGC[160.03]SVHK.G(2)	sp|P07910|HNRPC_HUMAN+sp|P07910|HNRPC_HUMAN	1	1000
1	072419_HeLa_invitro_H_RNAse_L_control_frac10_r1.12235.12235.1	xl	9.85E-01(0.5817+1.0000)	intra:1_nsx:1	-	2.9803	/	R.K[333.14]QLELR[162.12].Q(2)+R.M[147.04]EELHNQEVQK[333.14]R[162.12].K(2)	sp|Q15233|NONO_HUMAN+sp|Q15233|NONO_HUMAN	1	1000
1	072419_HeLa_invitro_H_RNAse_L_control_frac10_r1.12244.12244.1	xl	9.52E-01(0.8612+1.0000)	intra:1_nsx:1	-	4.0313	/	R.AVVPSK[325.13]R.Q(2)+K.YGK[325.13]IVGC[160.03]SVHK.G(2)	sp|P07910|HNRPC_HUMAN+sp|P07910|HNRPC_HUMAN	1	1000
1	072419_HeLa_invitro_H_RNAse_L_control_frac10_r1.12245.12245.1	xl	9.65E-01(0.8900+1.0000)	intra:1_nsx:1	-	0.049	/	R.AVVPSK[333.14]R[162.12].Q(2)+K.YGK[333.14]IVGC[160.03]SVHK[136.11].G(2)	sp|P07910|HNRPC_HUMAN+sp|P07910|HNRPC_HUMAN	1	1000
1	072419_HeLa_invitro_H_RNAse_L_control_frac10_r1.12252.12252.1	xl	2.74E-01(0.9924+0.9999)	intra:1_nsx:1	-	1.0384	/	K.LLSISGK[333.14]R[162.12].S(2)+R.SAPGGGSK[333.14]VPQK[136.11]K[136.11].V(2)	sp|P06748|NPM_HUMAN+sp|P06748|NPM_HUMAN	1	1000
1	072419_HeLa_invitro_H_RNAse_L_control_frac10_r1.12265.12265.2	xl	1.06E+00(0.3654+1.0000)	intra:1_nsx:1	-	1.2454	/	R.K[333.14]QLELR[162.12].Q(2)+R.M[147.04]EELHNQEVQK[333.14]R[162.12].K(2)	sp|Q15233|NONO_HUMAN+sp|Q15233|NONO_HUMAN	1	1000
1	072419_HeLa_invitro_H_RNAse_L_control_frac10_r1.12270.12270.1	xl	2.26E-01(0.9957+1.0000)	intra:1_nsx:1	-	2.5894	/	K.LLSISGK[325.13]R.S(2)+R.SAPGGGSK[325.13]VPQKK.V(2)	sp|P06748|NPM_HUMAN+sp|P06748|NPM_HUMAN	1	1000
0.779	072419_HeLa_invitro_H_RNAse_L_control_frac10_r1.12304.12304.1	xl	9.18E+00(0.1851+0.2287)	intra:1_nsx:0	-	-333.23	/	R.K[333.14]FGQGSR[162.12].S(2)+R.K[333.14]YGLNM[147.04]C[160.03]R[162.12].Q(2)	sp|P62273|RS29_HUMAN+sp|P62273|RS29_HUMAN	1	1000
1	072419_HeLa_invitro_H_RNAse_L_control_frac10_r1.12361.12361.1	xl	9.74E-02(0.9984+0.9999)	intra:1_nsx:1	-	2.89	/	K.LLSISGK[333.14]R[162.12].S(2)+R.SAPGGGSK[333.14]VPQK[136.11]K[136.11].V(2)	sp|P06748|NPM_HUMAN+sp|P06748|NPM_HUMAN	1	1000
1	072419_HeLa_invitro_H_RNAse_L_control_frac10_r1.12733.12733.1	xl	3.73E+00(0.9501+0.9578)	intra:1_nsx:1	-	1.7831	/	R.VKEVVK[325.13]K.H(2)+K.TK[325.13]PIWTR.N(2)	sp|P08238|HS90B_HUMAN+sp|P08238|HS90B_HUMAN,sp|P07900|HS90A_HUMAN	1	1000
1	072419_HeLa_invitro_H_RNAse_L_control_frac10_r1.12735.12735.1	xl	2.05E+00(0.9518+0.9729)	intra:1_nsx:1	-	-0.7726	/	R.VKEVVK[325.13]K.H(2)+K.TK[325.13]PIWTR.N(2)	sp|P08238|HS90B_HUMAN+sp|P08238|HS90B_HUMAN,sp|P07900|HS90A_HUMAN	1	1000
1	072419_HeLa_invitro_H_RNAse_L_control_frac10_r1.12833.12833.1	xl	2.51E+00(0.4237+1.0000)	intra:1_nsx:1	-	-0.1358	/	R.EK[333.14]QGTK[136.11].V(2)+R.SGK[333.14]HIGVC[160.03]ISVANNR[162.12].L(2)	sp|O60506|HNRPQ_HUMAN+sp|O60506|HNRPQ_HUMAN	1	1000
1	072419_HeLa_invitro_H_RNAse_L_control_frac10_r1.12840.12840.1	xl	3.09E+00(0.6115+1.0000)	intra:1_nsx:1	-	1.6999	/	R.EK[325.13]QGTK.V(2)+R.SGK[325.13]HIGVC[160.03]ISVANNR.L(2)	sp|O60506|HNRPQ_HUMAN+sp|O60506|HNRPQ_HUMAN	1	1000
1	072419_HeLa_invitro_H_RNAse_L_control_frac10_r1.12976.12976.1	xl	7.15E-03(1.0000+1.0000)	intra:1_nsx:1	-	0.6118	/	R.LAHYNK[333.14]R[162.12].S(2)+R.K[333.14]ESYSVYVYK[136.11].V(2)	sp|O60814|H2B1K_HUMAN,sp|Q16778|H2B2E_HUMAN+sp|O60814|H2B1K_HUMAN	1	1000
1	072419_HeLa_invitro_H_RNAse_L_control_frac10_r1.12979.12979.1	xl	4.47E-03(1.0000+1.0000)	intra:1_nsx:1	-	-3.9916	/	R.LAHYNK[325.13]R.S(2)+R.K[325.13]ESYSVYVYK.V(2)	sp|O60814|H2B1K_HUMAN,sp|Q16778|H2B2E_HUMAN+sp|O60814|H2B1K_HUMAN	1	1000
1	072419_HeLa_invitro_H_RNAse_L_control_frac10_r1.12982.12982.1	xl	4.15E+00(0.9999+0.8977)	intra:1_nsx:1	-	3.4139	/	R.LAHYNK[325.13]R.S(2)+R.K[325.13]ESYSVYVYK.V(2)	sp|O60814|H2B1K_HUMAN,sp|Q16778|H2B2E_HUMAN+sp|O60814|H2B1K_HUMAN	1	1000
1	072419_HeLa_invitro_H_RNAse_L_control_frac10_r1.13024.13024.1	xl	2.58E+00(0.6434+1.0000)	intra:1_nsx:1	-	2.1359	/	R.EK[325.13]QGTK.V(2)+R.SGK[325.13]HIGVC[160.03]ISVANNR.L(2)	sp|O60506|HNRPQ_HUMAN+sp|O60506|HNRPQ_HUMAN	1	1000
1	072419_HeLa_invitro_H_RNAse_L_control_frac10_r1.13089.13089.1	xl	5.88E+00(0.5583+0.7619)	intra:1_nsx:1	-	-1.5159	/	R.TK[333.14]QTAR[162.12].K(2)+R.K[333.14]LPFQR[162.12].L(2)	sp|P68431|H31_HUMAN,sp|Q71DI3|H32_HUMAN+sp|P68431|H31_HUMAN,sp|Q71DI3|H32_HUMAN	1	1000
1	072419_HeLa_invitro_H_RNAse_L_control_frac10_r1.13112.13112.1	xl	3.75E-01(0.8955+1.0000)	intra:1_nsx:1	-	2.1563	/	R.K[325.13]QLELR.Q(2)+R.MEELHNQEVQK[325.13]R.K(2)	sp|Q15233|NONO_HUMAN+sp|Q15233|NONO_HUMAN	1	1000
1	072419_HeLa_invitro_H_RNAse_L_control_frac10_r1.13121.13121.1	xl	2.56E-02(0.9959+1.0000)	intra:1_nsx:1	-	0.505	/	R.VNTTQK[333.14]R[162.12].Y(2)+K.AASLK[333.14]SNYNLPMHK[136.11].M(2)	sp|P36578|RL4_HUMAN+sp|P36578|RL4_HUMAN	1	1000
0.9997	072419_HeLa_invitro_H_RNAse_L_control_frac10_r1.13207.13207.1	xl	6.82E-03(0.8093+0.9999)	intra:1_nsx:0	-	1.2796	/	R.K[333.14]AQC[160.03]PIVER[162.12].L(2)+K.YAK[333.14]YLPHSAGR[162.12].Y(2)	sp|P46782|RS5_HUMAN+sp|P46782|RS5_HUMAN	1	1000
1	072419_HeLa_invitro_H_RNAse_L_control_frac10_r1.13517.13517.2	xl	4.18E-04(1.0000+1.0000)	intra:1_nsx:1	-	-279.867	/	R.K[333.14]AVVVC[160.03]PK[136.11].D(2)+K.TTWVTK[333.14]HAAENPGK[136.11].Y(2)	sp|Q00839|HNRPU_HUMAN+sp|Q00839|HNRPU_HUMAN	1	1000
1	072419_HeLa_invitro_H_RNAse_L_control_frac10_r1.13518.13518.1	xl	2.53E-03(0.9997+1.0000)	intra:1_nsx:1	-	2.7714	/	R.K[325.13]AVVVC[160.03]PK.D(2)+K.TTWVTK[325.13]HAAENPGK.Y(2)	sp|Q00839|HNRPU_HUMAN+sp|Q00839|HNRPU_HUMAN	1	1000
1	072419_HeLa_invitro_H_RNAse_L_control_frac10_r1.13541.13541.1	xl	1.49E-02(0.9998+0.9991)	intra:1_nsx:1	-	-2.2718	/	K.DKYK[325.13]NIGAK.L(2)+K.ISK[325.13]GANPVEIR.R(2)	sp|P10809|CH60_HUMAN+sp|P10809|CH60_HUMAN	1	1000
0.9994	072419_HeLa_invitro_H_RNAse_L_control_frac10_r1.13554.13554.1	xl	8.92E+00(0.0434+1.0000)	intra:1_nsx:1	-	5.4172	/	K.K[325.13]C[160.03]SER.W(2)+K.K[325.13]HPDSSVNFAEFSK.K(2)	sp|P26583|HMGB2_HUMAN,sp|P09429|HMGB1_HUMAN+sp|P26583|HMGB2_HUMAN	1	1000
1	072419_HeLa_invitro_H_RNAse_L_control_frac10_r1.13591.13591.1	xl	4.97E-02(0.9998+1.0000)	intra:1_nsx:1	-	3.9989	/	K.VGDK[325.13]IATR.K(2)+K.ESWHGK[325.13]PLPK.N(2)	sp|P29401|TKT_HUMAN+sp|P29401|TKT_HUMAN	1	1000
1	072419_HeLa_invitro_H_RNAse_L_control_frac10_r1.13658.13658.1	xl	5.20E+00(0.0843+1.0000)	intra:1_nsx:1	-	1.3976	/	K.K[325.13]C[160.03]SER.W(2)+K.K[325.13]HPDASVNFSEFSK.K(2)	sp|P09429|HMGB1_HUMAN,sp|P26583|HMGB2_HUMAN+sp|P09429|HMGB1_HUMAN	1	1000
1	072419_HeLa_invitro_H_RNAse_L_control_frac10_r1.13673.13673.1	xl	1.11E-02(1.0000+1.0000)	intra:1_nsx:1	-	5.4575	/	R.K[333.14]AYGQALAK[136.11].L(2)+K.ESWHGK[333.14]PLPK[136.11].N(2)	sp|P29401|TKT_HUMAN+sp|P29401|TKT_HUMAN	1	1000
0.9993	072419_HeLa_invitro_H_RNAse_L_control_frac10_r1.13685.13685.1	xl	6.83E-01(0.1528+0.6987)	intra:1_nsx:0	-	3.5856	/	K.LVSQK[333.14]PK[136.11].L(2)+K.K[333.14]LIELQAGK[136.11]K[136.11].S(2)	sp|P14314|GLU2B_HUMAN+sp|P14314|GLU2B_HUMAN	1	1000
1	072419_HeLa_invitro_H_RNAse_L_control_frac10_r1.13691.13691.1	xl	3.61E-01(0.9990+0.9998)	intra:1_nsx:1	-	-9.3381	/	R.K[325.13]AYGQALAK.L(2)+K.ESWHGK[325.13]PLPK.N(2)	sp|P29401|TKT_HUMAN+sp|P29401|TKT_HUMAN	1	1000
1	072419_HeLa_invitro_H_RNAse_L_control_frac10_r1.13692.13692.1	xl	2.83E-03(1.0000+1.0000)	intra:1_nsx:1	-	4.8048	/	R.K[333.14]AYGQALAK[136.11].L(2)+K.ESWHGK[333.14]PLPK[136.11].N(2)	sp|P29401|TKT_HUMAN+sp|P29401|TKT_HUMAN	1	1000
1	072419_HeLa_invitro_H_RNAse_L_control_frac10_r1.13696.13696.1	xl	1.22E-04(1.0000+1.0000)	intra:1_nsx:1	-	2.9599	/	R.K[325.13]AYGQALAK.L(2)+K.ESWHGK[325.13]PLPK.N(2)	sp|P29401|TKT_HUMAN+sp|P29401|TKT_HUMAN	1	1000
0.9692	072419_HeLa_invitro_H_RNAse_L_control_frac10_r1.13725.13725.1	xl	4.16E+00(0.0294+0.9983)	intra:1_nsx:0	-	-0.6914	/	K.LVSQK[325.13]PK.L(2)+K.K[325.13]LIELQAGKK.S(2)	sp|P14314|GLU2B_HUMAN+sp|P14314|GLU2B_HUMAN	1	1000
0.9996	072419_HeLa_invitro_H_RNAse_L_control_frac10_r1.13726.13726.1	xl	1.11E-01(0.4411+0.9951)	intra:1_nsx:0	-	0.2775	/	K.LVSQK[325.13]PK.L(2)+K.K[325.13]LIELQAGKK.S(2)	sp|P14314|GLU2B_HUMAN+sp|P14314|GLU2B_HUMAN	1	1000
1	072419_HeLa_invitro_H_RNAse_L_control_frac10_r1.13755.13755.1	xl	1.01E+00(0.9839+0.9957)	intra:1_nsx:1	-	2.748	/	R.APK[333.14]GSLR[162.12].K(2)+R.NFGTK[333.14]ISAR[162.12].A(2)	sp|Q01813|PFKAP_HUMAN+sp|Q01813|PFKAP_HUMAN	1	1000
1	072419_HeLa_invitro_H_RNAse_L_control_frac10_r1.13758.13758.1	xl	6.99E-01(0.9885+1.0000)	intra:1_nsx:1	-	8.4173	/	R.APK[325.13]GSLR.K(2)+R.NFGTK[325.13]ISAR.A(2)	sp|Q01813|PFKAP_HUMAN+sp|Q01813|PFKAP_HUMAN	1	1000
1	072419_HeLa_invitro_H_RNAse_L_control_frac10_r1.13778.13778.2	xl	1.39E-05(1.0000+1.0000)	intra:1_nsx:1	-	-2.2187	/	R.K[333.14]AYGQALAK[136.11].L(2)+K.ESWHGK[333.14]PLPK[136.11].N(2)	sp|P29401|TKT_HUMAN+sp|P29401|TKT_HUMAN	1	1000
1	072419_HeLa_invitro_H_RNAse_L_control_frac10_r1.13797.13797.1	xl	1.47E-03(1.0000+1.0000)	intra:1_nsx:1	-	2.9826	/	R.K[325.13]AYGQALAK.L(2)+K.ESWHGK[325.13]PLPK.N(2)	sp|P29401|TKT_HUMAN+sp|P29401|TKT_HUMAN	1	1000
1	072419_HeLa_invitro_H_RNAse_L_control_frac10_r1.13802.13802.1	xl	6.10E-05(1.0000+1.0000)	intra:1_nsx:1	-	3.5464	/	R.K[325.13]AYGQALAK.L(2)+K.ESWHGK[325.13]PLPK.N(2)	sp|P29401|TKT_HUMAN+sp|P29401|TKT_HUMAN	1	1000
0.9998	072419_HeLa_invitro_H_RNAse_L_control_frac10_r1.13840.13840.1	xl	9.37E-01(0.4149+1.0000)	intra:1_nsx:0	-	1.2472	/	R.YQK[325.13]SYR.-(2)+R.VK[325.13]GGGHVAQIYAIR.Q(2)	sp|P62249|RS16_HUMAN+sp|P62249|RS16_HUMAN	1	1000
1	072419_HeLa_invitro_H_RNAse_L_control_frac10_r1.13908.13908.2	xl	1.17E-01(0.9539+1.0000)	intra:1_nsx:1	-	2.1098	/	K.K[333.14]DEEVLK[136.11].K(2)+K.K[333.14]NC[160.03]PHIVVGTPGR[162.12].L(2)	sp|Q13838|DX39B_HUMAN,sp|O00148|DX39A_HUMAN+sp|Q13838|DX39B_HUMAN	1	1000
1	072419_HeLa_invitro_H_RNAse_L_control_frac10_r1.13913.13913.1	xl	4.22E-01(0.9616+1.0000)	intra:1_nsx:1	-	1.1604	/	K.K[325.13]DEEVLK.K(2)+K.K[325.13]NC[160.03]PHIVVGTPGR.L(2)	sp|Q13838|DX39B_HUMAN,sp|O00148|DX39A_HUMAN+sp|Q13838|DX39B_HUMAN	1	1000
1	072419_HeLa_invitro_H_RNAse_L_control_frac10_r1.14046.14046.2	xl	2.87E-02(0.9995+0.9999)	intra:1_nsx:1	-	6.0451	/	R.LAHYNK[333.14]R[162.12].S(2)+R.K[333.14]ESYSIYVYK[136.11].V(2)	sp|Q16778|H2B2E_HUMAN,sp|O60814|H2B1K_HUMAN+sp|Q16778|H2B2E_HUMAN	1	1000
1	072419_HeLa_invitro_H_RNAse_L_control_frac10_r1.14052.14052.1	xl	6.38E-02(0.9999+0.9978)	intra:1_nsx:1	-	6.8126	/	R.LAHYNK[325.13]R.S(2)+R.K[325.13]ESYSIYVYK.V(2)	sp|Q16778|H2B2E_HUMAN,sp|O60814|H2B1K_HUMAN+sp|Q16778|H2B2E_HUMAN	1	1000
1	072419_HeLa_invitro_H_RNAse_L_control_frac10_r1.14052.14052.2	xl	6.38E-02(0.6634+0.9978)	intra:1_nsx:1	-	6.8126	/	R.LAHYNK[325.13]R.S(2)+R.K[325.13]ESYSIYVYK.V(2)	sp|Q16778|H2B2E_HUMAN,sp|O60814|H2B1K_HUMAN+sp|Q16778|H2B2E_HUMAN	1	1000
1	072419_HeLa_invitro_H_RNAse_L_control_frac10_r1.14075.14075.1	xl	2.56E-03(1.0000+1.0000)	intra:1_nsx:1	-	0.8474	/	R.LAHYNK[325.13]R.S(2)+R.K[325.13]ESYSIYVYK.V(2)	sp|Q16778|H2B2E_HUMAN,sp|O60814|H2B1K_HUMAN+sp|Q16778|H2B2E_HUMAN	1	1000
1	072419_HeLa_invitro_H_RNAse_L_control_frac10_r1.14092.14092.1	xl	2.13E-03(1.0000+1.0000)	intra:1_nsx:1	-	2.2316	/	R.LAHYNK[333.14]R[162.12].S(2)+R.K[333.14]ESYSIYVYK[136.11].V(2)	sp|Q16778|H2B2E_HUMAN,sp|O60814|H2B1K_HUMAN+sp|Q16778|H2B2E_HUMAN	1	1000
1	072419_HeLa_invitro_H_RNAse_L_control_frac10_r1.14093.14093.1	xl	9.54E-02(0.9985+0.9895)	intra:1_nsx:1	-	5.8211	/	R.EGK[333.14]TDYYAR[162.12].K(2)+R.WNR[162.12]PK[333.14]MSLAQK[136.11].K(2)	sp|P46777|RL5_HUMAN+sp|P46777|RL5_HUMAN	1	1000
1	072419_HeLa_invitro_H_RNAse_L_control_frac10_r1.14103.14103.1	xl	6.26E-01(0.9506+1.0000)	intra:1_nsx:1	-	1.2328	/	K.YNTPK[325.13]YR.M(2)+K.GAVDGGLSIPHSTK[325.13]R.F(2)	sp|P46777|RL5_HUMAN+sp|P46777|RL5_HUMAN	1	1000
0.6831	072419_HeLa_invitro_H_RNAse_L_control_frac10_r1.14472.14472.2	xl	3.93E+00(0.6753+1.0000)	intra:0_nsx:0	-	1.7681	/	R.TK[333.14]QTAR[162.12].K(2)+K.WK[333.14]GFSEEHNTWEPEK[136.11].N(2)	sp|P68431|H31_HUMAN,sp|Q71DI3|H32_HUMAN+sp|P45973|CBX5_HUMAN	2	1000
0.9953	072419_HeLa_invitro_H_RNAse_L_control_frac10_r1.14491.14491.1	xl	7.56E-01(0.8836+1.0000)	intra:0_nsx:0	-	3.6576	/	R.TK[325.13]QTAR.K(2)+K.WK[325.13]GFSEEHNTWEPEK.N(2)	sp|P68431|H31_HUMAN,sp|Q71DI3|H32_HUMAN+sp|P45973|CBX5_HUMAN	2	1000
0.9994	072419_HeLa_invitro_H_RNAse_L_control_frac10_r1.14573.14573.2	xl	5.12E-02(0.8161+0.9913)	intra:1_nsx:0	-	3.287	/	R.K[333.14]FGQGSR[162.12].S(2)+R.K[333.14]YGLNMC[160.03]R[162.12].Q(2)	sp|P62273|RS29_HUMAN+sp|P62273|RS29_HUMAN	1	1000
1	072419_HeLa_invitro_H_RNAse_L_control_frac10_r1.14589.14589.1	xl	3.90E-01(0.6972+0.8304)	intra:1_nsx:0	-	3.1327	/	R.K[325.13]FGQGSR.S(2)+R.K[325.13]YGLNMC[160.03]R.Q(2)	sp|P62273|RS29_HUMAN+sp|P62273|RS29_HUMAN	1	1000
1	072419_HeLa_invitro_H_RNAse_L_control_frac10_r1.14633.14633.2	xl	1.48E+00(0.4089+1.0000)	intra:1_nsx:1	-	1.5878	/	K.VDIK[333.14]DR[162.12].K(2)+R.VTYK[333.14]NVPNWHR[162.12].D(2)	sp|P62826|RAN_HUMAN+sp|P62826|RAN_HUMAN	1	1000
0.9692	072419_HeLa_invitro_H_RNAse_L_control_frac10_r1.14781.14781.1	xl	4.49E-01(0.0005+1.0000)	intra:1_nsx:0	-	0.4657	/	R.SAALK[333.14]K[136.11].A(2)+R.VLSHSSK[333.14]IIIVNR[162.12].N(2)	sp|A1L0T0|ILVBL_HUMAN+sp|A1L0T0|ILVBL_HUMAN	1	1000
1	072419_HeLa_invitro_H_RNAse_L_control_frac10_r1.14788.14788.1	xl	1.71E-01(0.9990+0.9976)	intra:1_nsx:1	-	2.1364	/	K.ALK[325.13]LNSNEAR.L(2)+R.GK[325.13]PLPEYHVR.L(2)	sp|P78527|PRKDC_HUMAN+sp|P78527|PRKDC_HUMAN	1	1000
1	072419_HeLa_invitro_H_RNAse_L_control_frac10_r1.14793.14793.1	xl	3.93E+00(0.5348+1.0000)	intra:1_nsx:1	-	2.5885	/	R.AK[333.14]LYR[162.12].Y(2)+R.DQVLK[333.14]LC[160.03]ANHR[162.12].L(2)	sp|P49792|RBP2_HUMAN+sp|P49792|RBP2_HUMAN	1	1000
1	072419_HeLa_invitro_H_RNAse_L_control_frac10_r1.14869.14869.1	xl	2.62E+00(0.8251+1.0000)	intra:1_nsx:1	-	8.6749	/	R.K[325.13]QLATK.A(2)+R.RYQK[325.13]STELLIR.K(2)	sp|P68431|H31_HUMAN,sp|Q71DI3|H32_HUMAN+sp|P68431|H31_HUMAN,sp|Q71DI3|H32_HUMAN	1	1000
0.8266	072419_HeLa_invitro_H_RNAse_L_control_frac10_r1.14884.14884.2	xl	1.30E+00(0.0226+1.0000)	intra:1_nsx:0	-	5.631	/	R.IK[333.14]GSEADR[162.12].Q(2)+R.HGNQYIQVNEPWK[333.14]R[162.12].L(2)	sp|P56192|SYMC_HUMAN+sp|P56192|SYMC_HUMAN	1	1000
0.9994	072419_HeLa_invitro_H_RNAse_L_control_frac10_r1.14897.14897.1	xl	7.67E-02(0.7194+1.0000)	intra:1_nsx:0	-	6.6548	/	R.IK[325.13]GSEADR.Q(2)+R.HGNQYIQVNEPWK[325.13]R.L(2)	sp|P56192|SYMC_HUMAN+sp|P56192|SYMC_HUMAN	1	1000
1	072419_HeLa_invitro_H_RNAse_L_control_frac10_r1.15047.15047.1	xl	2.94E-02(1.0000+1.0000)	intra:1_nsx:1	-	3.876	/	R.K[136.11]QLATK[333.14]AAR[162.12].K(2)+R.YQK[333.14]STELLIR[162.12].K(2)	sp|P68431|H31_HUMAN,sp|Q71DI3|H32_HUMAN+sp|P68431|H31_HUMAN,sp|Q71DI3|H32_HUMAN	1	1000
1	072419_HeLa_invitro_H_RNAse_L_control_frac10_r1.15049.15049.1	xl	3.66E-02(1.0000+1.0000)	intra:1_nsx:1	-	4.0195	/	R.KQLATK[325.13]AAR.K(2)+R.YQK[325.13]STELLIR.K(2)	sp|P68431|H31_HUMAN,sp|Q71DI3|H32_HUMAN+sp|P68431|H31_HUMAN,sp|Q71DI3|H32_HUMAN	1	1000
0.948	072419_HeLa_invitro_H_RNAse_L_control_frac10_r1.15056.15056.1	xl	1.20E+00(0.0705+0.3478)	intra:1_nsx:0	-	4.6787	/	R.NVK[333.14]GPVR[162.12].E(2)+R.VQPIK[333.14]LAR[162.12].V(2)	sp|P62857|RS28_HUMAN+sp|P62857|RS28_HUMAN	1	1000
0.9997	072419_HeLa_invitro_H_RNAse_L_control_frac10_r1.15135.15135.1	xl	2.16E+00(0.1162+0.7504)	intra:1_nsx:0	-	3.3757	/	K.K[325.13]FNWR.Y(2)+R.EFK[325.13]TTNR.L(2)	sp|O60264|SMCA5_HUMAN+sp|O60264|SMCA5_HUMAN	1	1000
1	072419_HeLa_invitro_H_RNAse_L_control_frac10_r1.15219.15219.1	xl	4.85E-01(0.9167+1.0000)	intra:1_nsx:1	-	9.0921	/	K.EK[325.13]ASLPGVK.K(2)+R.WYNHIK[325.13]SYEK.E(2)	sp|P24534|EF1B_HUMAN+sp|P24534|EF1B_HUMAN	1	1000
1	072419_HeLa_invitro_H_RNAse_L_control_frac10_r1.15241.15241.1	xl	1.69E-02(0.9960+1.0000)	intra:1_nsx:1	-	7.6538	/	K.EK[333.14]ASLPGVK[136.11].K(2)+R.WYNHIK[333.14]SYEK[136.11].E(2)	sp|P24534|EF1B_HUMAN+sp|P24534|EF1B_HUMAN	1	1000
0.9994	072419_HeLa_invitro_H_RNAse_L_control_frac10_r1.15267.15267.1	xl	8.49E-02(0.9712+0.8525)	intra:1_nsx:0	-	6.3049	/	R.NK[325.13]FEEAER.S(2)+K.K[325.13]LIELQAGKK.S(2)	sp|P14314|GLU2B_HUMAN+sp|P14314|GLU2B_HUMAN	1	1000
1	072419_HeLa_invitro_H_RNAse_L_control_frac10_r1.15272.15272.1	xl	1.44E-01(0.9991+1.0000)	intra:1_nsx:1	-	6.2757	/	K.FGK[325.13]EVAVK.M(2)+R.GK[325.13]PLPEYHVR.L(2)	sp|P78527|PRKDC_HUMAN+sp|P78527|PRKDC_HUMAN	1	1000
0.9104	072419_HeLa_invitro_H_RNAse_L_control_frac10_r1.15287.15287.1	xl	3.71E+00(0.0198+1.0000)	intra:1_nsx:0	-	8.683	/	K.K[333.14]QVVK[136.11].L(2)+R.EISYAIK[333.14]NIHGVR[162.12].T(2)	sp|P50570|DYN2_HUMAN+sp|P50570|DYN2_HUMAN	1	1000
1	072419_HeLa_invitro_H_RNAse_L_control_frac10_r1.15290.15290.1	xl	4.48E+00(0.1498+0.7730)	intra:1_nsx:0	-	1.9097	/	R.NK[325.13]FEEAER.S(2)+K.K[325.13]LIELQAGKK.S(2)	sp|P14314|GLU2B_HUMAN+sp|P14314|GLU2B_HUMAN	1	1000
1	072419_HeLa_invitro_H_RNAse_L_control_frac10_r1.15307.15307.1	xl	5.48E-01(0.9059+1.0000)	intra:1_nsx:1	-	8.0799	/	K.EK[325.13]ASLPGVK.K(2)+R.WYNHIK[325.13]SYEK.E(2)	sp|P24534|EF1B_HUMAN+sp|P24534|EF1B_HUMAN	1	1000
1	072419_HeLa_invitro_H_RNAse_L_control_frac10_r1.15319.15319.1	xl	3.79E-02(0.9940+1.0000)	intra:1_nsx:1	-	2.6431	/	K.EK[325.13]ASLPGVK.K(2)+R.WYNHIK[325.13]SYEK.E(2)	sp|P24534|EF1B_HUMAN+sp|P24534|EF1B_HUMAN	1	1000
1	072419_HeLa_invitro_H_RNAse_L_control_frac10_r1.15325.15325.1	xl	3.61E+00(0.9797+0.9811)	intra:1_nsx:1	-	2.3444	/	K.FGK[325.13]EVAVK.M(2)+R.GK[325.13]PLPEYHVR.L(2)	sp|P78527|PRKDC_HUMAN+sp|P78527|PRKDC_HUMAN	1	1000
1	072419_HeLa_invitro_H_RNAse_L_control_frac10_r1.15334.15334.1	xl	3.87E-01(0.9926+0.9998)	intra:1_nsx:1	-	9.3673	/	K.FGK[333.14]EVAVK[136.11].M(2)+R.GK[333.14]PLPEYHVR[162.12].L(2)	sp|P78527|PRKDC_HUMAN+sp|P78527|PRKDC_HUMAN	1	1000
1	072419_HeLa_invitro_H_RNAse_L_control_frac10_r1.15345.15345.1	xl	3.08E-03(0.9998+1.0000)	intra:1_nsx:1	-	5.6754	/	K.FGK[333.14]EVAVK[136.11].M(2)+R.GK[333.14]PLPEYHVR[162.12].L(2)	sp|P78527|PRKDC_HUMAN+sp|P78527|PRKDC_HUMAN	1	1000
0.9196	072419_HeLa_invitro_H_RNAse_L_control_frac10_r1.15351.15351.1	xl	2.96E-03(1.0000+1.0000)	intra:0_nsx:0	-	9.622	/	K.YGK[325.13]IVGC[160.03]SVHK.G(2)+R.SSGPYGGGGQYFAK[325.13]PR.N(2)	sp|P07910|HNRPC_HUMAN+sp|P09651|ROA1_HUMAN	2	1000
0.8266	072419_HeLa_invitro_H_RNAse_L_control_frac10_r1.15358.15358.2	xl	2.05E+00(0.3341+0.0036)	intra:1_nsx:0	-	5.9053	/	R.K[333.14]NGFVVLK[136.11].G(2)+K.GR[162.12]PC[160.03]K[333.14]IVEM[147.04]STSK[136.11].T(2)	sp|P63241|IF5A1_HUMAN,sp|Q9GZV4|IF5A2_HUMAN+sp|P63241|IF5A1_HUMAN,sp|Q9GZV4|IF5A2_HUMAN	1	1000
1	072419_HeLa_invitro_H_RNAse_L_control_frac10_r1.15363.15363.1	xl	2.18E+00(0.8925+1.0000)	intra:1_nsx:1	-	6.2454	/	R.LMSGK[325.13]VK.V(2)+R.SGK[325.13]HIGVC[160.03]ISVANNR.L(2)	sp|O60506|HNRPQ_HUMAN,sp|O43390|HNRPR_HUMAN+sp|O60506|HNRPQ_HUMAN	1	1000
1	072419_HeLa_invitro_H_RNAse_L_control_frac10_r1.15405.15405.1	xl	9.98E-02(0.9981+0.9996)	intra:1_nsx:1	-	7.4496	/	K.K[325.13]YVIYIER.V(2)+R.GHYK[325.13]GQQIGK.V(2)	sp|Q9UNX3|RL26L_HUMAN,sp|P61254|RL26_HUMAN+sp|Q9UNX3|RL26L_HUMAN,sp|P61254|RL26_HUMAN	1	1000
1	072419_HeLa_invitro_H_RNAse_L_control_frac10_r1.15561.15561.1	xl	7.73E-04(1.0000+0.9999)	intra:1_nsx:1	-	9.8374	/	R.VIIEK[333.14]YYTR[162.12].L(2)+R.LGNDFHTNK[333.14]R[162.12].V(2)	sp|P08708|RS17_HUMAN+sp|P08708|RS17_HUMAN	1	1000
1	072419_HeLa_invitro_H_RNAse_L_control_frac10_r1.15567.15567.1	xl	2.30E-04(1.0000+1.0000)	intra:1_nsx:1	-	8.9514	/	R.VIIEK[325.13]YYTR.L(2)+R.LGNDFHTNK[325.13]R.V(2)	sp|P08708|RS17_HUMAN+sp|P08708|RS17_HUMAN	1	1000
1	072419_HeLa_invitro_H_RNAse_L_control_frac10_r1.15579.15579.1	xl	4.17E-04(1.0000+0.9999)	intra:1_nsx:1	-	7.6882	/	R.VIIEK[333.14]YYTR[162.12].L(2)+R.LGNDFHTNK[333.14]R[162.12].V(2)	sp|P08708|RS17_HUMAN+sp|P08708|RS17_HUMAN	1	1000
1	072419_HeLa_invitro_H_RNAse_L_control_frac10_r1.15597.15597.1	xl	1.32E-03(1.0000+0.9996)	intra:1_nsx:1	-	5.039	/	R.VIIEK[325.13]YYTR.L(2)+R.LGNDFHTNK[325.13]R.V(2)	sp|P08708|RS17_HUMAN+sp|P08708|RS17_HUMAN	1	1000
1	072419_HeLa_invitro_H_RNAse_L_control_frac10_r1.15603.15603.1	xl	2.41E-03(1.0000+0.9996)	intra:1_nsx:1	-	5.2155	/	R.LGNDFHTNK[333.14]R[162.12].V(2)+R.GISIK[333.14]LQEEER[162.12].E(2)	sp|P08708|RS17_HUMAN+sp|P08708|RS17_HUMAN	1	1000
1	072419_HeLa_invitro_H_RNAse_L_control_frac10_r1.15609.15609.1	xl	1.59E-03(0.9996+1.0000)	intra:1_nsx:1	-	6.8319	/	R.LGNDFHTNK[325.13]R.V(2)+R.GISIK[325.13]LQEEER.E(2)	sp|P08708|RS17_HUMAN+sp|P08708|RS17_HUMAN	1	1000
1	072419_HeLa_invitro_H_RNAse_L_control_frac10_r1.15619.15619.1	xl	2.79E-02(0.9911+0.9998)	intra:1_nsx:1	-	7.0795	/	R.LGNDFHTNK[325.13]R.V(2)+R.GISIK[325.13]LQEEER.E(2)	sp|P08708|RS17_HUMAN+sp|P08708|RS17_HUMAN	1	1000
1	072419_HeLa_invitro_H_RNAse_L_control_frac10_r1.15620.15620.2	xl	7.23E-01(0.3833+0.8355)	intra:1_nsx:1	-	1.5631	/	R.LGNDFHTNK[333.14]R[162.12].V(2)+R.GISIK[333.14]LQEEER[162.12].E(2)	sp|P08708|RS17_HUMAN+sp|P08708|RS17_HUMAN	1	1000
1	072419_HeLa_invitro_H_RNAse_L_control_frac10_r1.15668.15668.1	xl	3.64E-04(1.0000+1.0000)	intra:1_nsx:1	-	7.656	/	R.VIIEK[325.13]YYTR.L(2)+R.LGNDFHTNK[325.13]R.V(2)	sp|P08708|RS17_HUMAN+sp|P08708|RS17_HUMAN	1	1000
1	072419_HeLa_invitro_H_RNAse_L_control_frac10_r1.15671.15671.1	xl	2.16E-03(0.9998+1.0000)	intra:1_nsx:1	-	8.7156	/	R.TTTGNK[333.14]VFGALK[136.11].G(2)+R.K[333.14]HIM[147.04]GQNVADYM[147.04]R[162.12].Y(2)	sp|P46777|RL5_HUMAN+sp|P46777|RL5_HUMAN	1	1000
1	072419_HeLa_invitro_H_RNAse_L_control_frac10_r1.15729.15729.1	xl	1.33E-01(0.9994+1.0000)	intra:1_nsx:1	-	2.5297	/	R.TTTGNK[325.13]VFGALK.G(2)+R.K[325.13]HIM[147.04]GQNVADYM[147.04]R.Y(2)	sp|P46777|RL5_HUMAN+sp|P46777|RL5_HUMAN	1	1000
1	072419_HeLa_invitro_H_RNAse_L_control_frac10_r1.15739.15739.1	xl	1.89E+00(0.9418+1.0000)	intra:1_nsx:1	-	4.6862	/	K.YFDK[325.13]ASYR.V(2)+K.AFGQAK[325.13]HQPTAIIAK.T(2)	sp|P29401|TKT_HUMAN+sp|P29401|TKT_HUMAN	1	1000
1	072419_HeLa_invitro_H_RNAse_L_control_frac10_r1.15757.15757.1	xl	2.62E-02(0.9999+1.0000)	intra:1_nsx:1	-	2.3021	/	R.TTTGNK[325.13]VFGALK.G(2)+R.K[325.13]HIM[147.04]GQNVADYM[147.04]R.Y(2)	sp|P46777|RL5_HUMAN+sp|P46777|RL5_HUMAN	1	1000
1	072419_HeLa_invitro_H_RNAse_L_control_frac10_r1.15765.15765.1	xl	1.44E-04(1.0000+1.0000)	intra:1_nsx:1	-	7.3417	/	R.LFC[160.03]VGFTK[325.13]K.R(2)+R.K[325.13]TSYAQHQQVR.Q(2)	sp|P61247|RS3A_HUMAN+sp|P61247|RS3A_HUMAN	1	1000
1	072419_HeLa_invitro_H_RNAse_L_control_frac10_r1.15963.15963.1	xl	4.03E-02(0.9986+1.0000)	intra:1_nsx:1	-	0.3678	/	R.LFC[160.03]VGFTK[333.14]K[136.11].R(2)+R.K[333.14]TSYAQHQQVR[162.12].Q(2)	sp|P61247|RS3A_HUMAN+sp|P61247|RS3A_HUMAN	1	1000
1	072419_HeLa_invitro_H_RNAse_L_control_frac10_r1.15994.15994.1	xl	9.65E-02(0.9940+0.9981)	intra:1_nsx:1	-	12.7007	/	K.K[333.14]IFVGGIK[136.11].E(2)+R.EESGK[333.14]PGAHVTVK[136.11].K(2)	sp|P22626|ROA2_HUMAN,sp|P09651|ROA1_HUMAN,sp|P51991|ROA3_HUMAN,sp|Q13151|ROA0_HUMAN+sp|P22626|ROA2_HUMAN	1	1000
0.7267	072419_HeLa_invitro_H_RNAse_L_control_frac10_r1.16027.16027.2	xl	1.52E+00(0.0020+1.0000)	intra:1_nsx:0	-	12.1024	/	K.K[333.14]GESVK[136.11].R(2)+R.LLMHGK[333.14]EVGSIIGK[136.11].K(2)	sp|Q15365|PCBP1_HUMAN,sp|Q15366|PCBP2_HUMAN+sp|Q15365|PCBP1_HUMAN,sp|Q15366|PCBP2_HUMAN,sp|P57721|PCBP3_HUMAN	1	1000
1	072419_HeLa_invitro_H_RNAse_L_control_frac10_r1.16118.16118.1	xl	2.20E-02(0.9997+1.0000)	intra:1_nsx:1	-	8.8547	/	R.SGK[325.13]PAELLK.M(2)+K.ESWHGK[325.13]PLPK.N(2)	sp|P29401|TKT_HUMAN+sp|P29401|TKT_HUMAN	1	1000
1	072419_HeLa_invitro_H_RNAse_L_control_frac10_r1.16121.16121.1	xl	2.07E-01(0.9693+1.0000)	intra:1_nsx:1	-	9.5931	/	R.SGK[333.14]PAELLK[136.11].M(2)+K.ESWHGK[333.14]PLPK[136.11].N(2)	sp|P29401|TKT_HUMAN+sp|P29401|TKT_HUMAN	1	1000
1	072419_HeLa_invitro_H_RNAse_L_control_frac10_r1.16125.16125.1	xl	6.17E-02(0.9991+1.0000)	intra:1_nsx:1	-	10.1438	/	R.SGK[325.13]PAELLK.M(2)+K.ESWHGK[325.13]PLPK.N(2)	sp|P29401|TKT_HUMAN+sp|P29401|TKT_HUMAN	1	1000
1	072419_HeLa_invitro_H_RNAse_L_control_frac10_r1.16133.16133.1	xl	7.60E-03(0.9990+1.0000)	intra:1_nsx:1	-	7.6868	/	R.SGK[333.14]PAELLK[136.11].M(2)+K.ESWHGK[333.14]PLPK[136.11].N(2)	sp|P29401|TKT_HUMAN+sp|P29401|TKT_HUMAN	1	1000
0.9535	072419_HeLa_invitro_H_RNAse_L_control_frac10_r1.16256.16256.1	xl	7.75E-01(0.9979+1.0000)	intra:0_nsx:0	-	3.9951	/	K.GFGYK[333.14]GSC[160.03]FHR[162.12].L(2)+K.YVSHGATGK[333.14]GNDQVR[162.12].F(2)	sp|P62937|PPIA_HUMAN+sp|P00966|ASSY_HUMAN	2	1000
1	072419_HeLa_invitro_H_RNAse_L_control_frac10_r1.16339.16339.1	xl	1.54E-01(0.9991+1.0000)	intra:1_nsx:1	-	5.9518	/	K.LDSGK[325.13]ELK.L(2)+R.GTK[325.13]VILHLK.E(2)	sp|P08238|HS90B_HUMAN+sp|P08238|HS90B_HUMAN,sp|P07900|HS90A_HUMAN	1	1000
1	072419_HeLa_invitro_H_RNAse_L_control_frac10_r1.16348.16348.1	xl	1.59E-01(0.9992+1.0000)	intra:1_nsx:1	-	0.6815	/	K.LDSGK[333.14]ELK[136.11].L(2)+R.GTK[333.14]VILHLK[136.11].E(2)	sp|P08238|HS90B_HUMAN+sp|P08238|HS90B_HUMAN,sp|P07900|HS90A_HUMAN	1	1000
1	072419_HeLa_invitro_H_RNAse_L_control_frac10_r1.16359.16359.1	xl	3.26E-02(0.9991+1.0000)	intra:1_nsx:1	-	5.6619	/	K.LDSGK[333.14]ELK[136.11].L(2)+R.GTK[333.14]VILHLK[136.11].E(2)	sp|P08238|HS90B_HUMAN+sp|P08238|HS90B_HUMAN,sp|P07900|HS90A_HUMAN	1	1000
0.9989	072419_HeLa_invitro_H_RNAse_L_control_frac10_r1.16370.16370.1	xl	4.33E-01(0.6480+1.0000)	intra:1_nsx:0	-	10.4907	/	R.VK[333.14]IM[147.04]FNK[136.11].K(2)+R.ATLSK[333.14]HQAVQLPR[162.12].E(2)	sp|O95758|PTBP3_HUMAN+sp|O95758|PTBP3_HUMAN	1	1000
0.9981	072419_HeLa_invitro_H_RNAse_L_control_frac10_r1.16474.16474.1	xl	1.97E-01(0.9014+1.0000)	intra:1_nsx:0	-	8.237	/	K.VQESTK[333.14]GPDEAK[136.11].L(2)+K.LC[160.03]DSYEIR[162.12]PGK[333.14]HLGVC[160.03]ISVANNR[162.12].L(2)	sp|O43390|HNRPR_HUMAN+sp|O43390|HNRPR_HUMAN	1	1000
1	072419_HeLa_invitro_H_RNAse_L_control_frac10_r1.16496.16496.1	xl	4.84E-04(1.0000+1.0000)	intra:1_nsx:0	-	8.3207	/	K.VQESTK[325.13]GPDEAK.L(2)+K.LC[160.03]DSYEIRPGK[325.13]HLGVC[160.03]ISVANNR.L(2)	sp|O43390|HNRPR_HUMAN+sp|O43390|HNRPR_HUMAN	1	1000
0.823	072419_HeLa_invitro_H_RNAse_L_control_frac10_r1.16533.16533.1	xl	2.00E+00(0.0486+0.0937)	intra:1_nsx:0	-	7.675	/	R.VSK[325.13]GGSFGR.G(2)+R.FIQDHLK[325.13]PSPQFQEQVK.K(2)	sp|Q9Y6K5|OAS3_HUMAN+sp|Q9Y6K5|OAS3_HUMAN	1	1000
0.9989	072419_HeLa_invitro_H_RNAse_L_control_frac10_r1.16576.16576.1	xl	1.87E-03(1.0000+1.0000)	intra:0_nsx:0	-	4.0269	/	K.IK[325.13]IIAPPER.K(2)+K.HELQANC[160.03]YEEVK[325.13]DR.C(2)	sp|P68032|ACTC_HUMAN,sp|P68133|ACTS_HUMAN,sp|P60709|ACTB_HUMAN,sp|P63261|ACTG_HUMAN,sp|P62736|ACTA_HUMAN,sp|P63267|ACTH_HUMAN+sp|P23528|COF1_HUMAN	2	1000
1	072419_HeLa_invitro_H_RNAse_L_control_frac10_r1.16753.16753.1	xl	1.53E-04(1.0000+1.0000)	intra:1_nsx:0	-	6.3997	/	R.ATVM[147.04]LYDDGNK[325.13]R.W(2)+R.GVK[325.13]YNQATPNFHQWR.D(2)	sp|P50552|VASP_HUMAN+sp|P50552|VASP_HUMAN	1	1000
0.948	072419_HeLa_invitro_H_RNAse_L_control_frac10_r1.16756.16756.1	xl	4.29E+00(0.0284+0.1081)	intra:1_nsx:0	-	6.1399	/	K.K[333.14]AYVR[162.12].L(2)+K.LGFK[333.14]IR[162.12].K(2)	sp|P62750|RL23A_HUMAN,sp|Q8IWR0|Z3H7A_HUMAN+sp|Q8IWR0|Z3H7A_HUMAN	2	1000
0.948	072419_HeLa_invitro_H_RNAse_L_control_frac10_r1.16773.16773.1	xl	6.27E+00(0.0206+0.0340)	intra:1_nsx:0	-	6.149	/	K.K[325.13]AYVR.L(2)+K.LGFK[325.13]IR.K(2)	sp|P62750|RL23A_HUMAN,sp|Q8IWR0|Z3H7A_HUMAN+sp|Q8IWR0|Z3H7A_HUMAN	2	1000
0.9994	072419_HeLa_invitro_H_RNAse_L_control_frac10_r1.16898.16898.1	xl	5.60E+00(0.4402+0.9617)	intra:1_nsx:0	-	8.5991	/	K.K[333.14]EEILK[136.11].Q(2)+K.YK[333.14]PLDLR[162.12]PK[136.11].K(2)	sp|P42766|RL35_HUMAN,sp|P84098|RL19_HUMAN,sp|Q14643|ITPR1_HUMAN,sp|Q14571|ITPR2_HUMAN,sp|Q14573|ITPR3_HUMAN+sp|P42766|RL35_HUMAN	1	1000
1	072419_HeLa_invitro_H_RNAse_L_control_frac10_r1.17013.17013.1	xl	5.22E-01(0.9889+1.0000)	intra:1_nsx:1	-	7.8396	/	R.NGK[333.14]TSK[136.11].K(2)+K.TEWLDGK[333.14]HVVFGK[136.11].V(2)	sp|P62937|PPIA_HUMAN+sp|P62937|PPIA_HUMAN	1	1000
1	072419_HeLa_invitro_H_RNAse_L_control_frac10_r1.17024.17024.1	xl	4.16E-01(0.9954+1.0000)	intra:1_nsx:1	-	8.1606	/	R.NGK[325.13]TSK.K(2)+K.TEWLDGK[325.13]HVVFGK.V(2)	sp|P62937|PPIA_HUMAN+sp|P62937|PPIA_HUMAN	1	1000
0.9994	072419_HeLa_invitro_H_RNAse_L_control_frac10_r1.17050.17050.1	xl	9.32E-01(0.3409+1.0000)	intra:1_nsx:0	-	9.6481	/	R.STMK[325.13]PVQK.V(2)+R.VMEHFIK[325.13]LYK.K(2)	sp|P11021|BIP_HUMAN+sp|P11021|BIP_HUMAN	1	1000
1	072419_HeLa_invitro_H_RNAse_L_control_frac10_r1.17055.17055.1	xl	3.02E-03(0.9997+1.0000)	intra:1_nsx:1	-	9.576	/	R.NGK[333.14]TSK[136.11].K(2)+K.TEWLDGK[333.14]HVVFGK[136.11].V(2)	sp|P62937|PPIA_HUMAN+sp|P62937|PPIA_HUMAN	1	1000
1	072419_HeLa_invitro_H_RNAse_L_control_frac10_r1.17068.17068.1	xl	4.60E-02(0.9990+1.0000)	intra:1_nsx:1	-	4.7947	/	K.KPDDGK[325.13]M[147.04]K.G(2)+R.FEELGVK[325.13]FVK.K(2)	sp|Q04760|LGUL_HUMAN+sp|Q04760|LGUL_HUMAN	1	1000
1	072419_HeLa_invitro_H_RNAse_L_control_frac10_r1.17084.17084.1	xl	4.71E+00(0.8731+1.0000)	intra:1_nsx:1	-	8.4573	/	R.IK[325.13]ELVK.K(2)+R.GTK[325.13]VILHLK.E(2)	sp|P07900|HS90A_HUMAN+sp|P07900|HS90A_HUMAN,sp|P08238|HS90B_HUMAN	1	1000
0.9994	072419_HeLa_invitro_H_RNAse_L_control_frac10_r1.17093.17093.1	xl	6.37E+00(0.0899+0.9996)	intra:1_nsx:0	-	11.8438	/	R.STMK[325.13]PVQK.V(2)+R.VMEHFIK[325.13]LYK.K(2)	sp|P11021|BIP_HUMAN+sp|P11021|BIP_HUMAN	1	1000
1	072419_HeLa_invitro_H_RNAse_L_control_frac10_r1.17113.17113.1	xl	5.23E-01(0.9734+1.0000)	intra:1_nsx:1	-	7.9925	/	R.NGK[333.14]TSK[136.11].K(2)+K.TEWLDGK[333.14]HVVFGK[136.11].V(2)	sp|P62937|PPIA_HUMAN+sp|P62937|PPIA_HUMAN	1	1000
1	072419_HeLa_invitro_H_RNAse_L_control_frac10_r1.17125.17125.1	xl	1.35E+00(0.9850+1.0000)	intra:1_nsx:1	-	7.6347	/	R.NGK[325.13]TSK.K(2)+K.TEWLDGK[325.13]HVVFGK.V(2)	sp|P62937|PPIA_HUMAN+sp|P62937|PPIA_HUMAN	1	1000
1	072419_HeLa_invitro_H_RNAse_L_control_frac10_r1.17128.17128.1	xl	3.25E-01(0.9251+1.0000)	intra:1_nsx:1	-	5.9465	/	K.K[136.11]PDDGK[333.14]M[147.04]K[136.11].G(2)+R.FEELGVK[333.14]FVK[136.11].K(2)	sp|Q04760|LGUL_HUMAN+sp|Q04760|LGUL_HUMAN	1	1000
1	072419_HeLa_invitro_H_RNAse_L_control_frac10_r1.17145.17145.1	xl	3.35E-02(0.9998+0.9911)	intra:1_nsx:1	-	10.1432	/	K.KPDDGK[325.13]M[147.04]K.G(2)+R.FEELGVK[325.13]FVK.K(2)	sp|Q04760|LGUL_HUMAN+sp|Q04760|LGUL_HUMAN	1	1000
1	072419_HeLa_invitro_H_RNAse_L_control_frac10_r1.17161.17161.1	xl	1.66E-01(0.9842+1.0000)	intra:1_nsx:1	-	9.8882	/	K.GK[325.13]NVLINK.D(2)+K.K[325.13]VHVIFNYK.G(2)	sp|P27797|CALR_HUMAN+sp|P27797|CALR_HUMAN	1	1000
1	072419_HeLa_invitro_H_RNAse_L_control_frac10_r1.17175.17175.1	xl	3.80E-01(0.9897+0.9998)	intra:1_nsx:1	-	9.2834	/	K.KPDDGK[325.13]M[147.04]K.G(2)+R.FEELGVK[325.13]FVK.K(2)	sp|Q04760|LGUL_HUMAN+sp|Q04760|LGUL_HUMAN	1	1000
1	072419_HeLa_invitro_H_RNAse_L_control_frac10_r1.17199.17199.1	xl	6.61E-02(0.9998+1.0000)	intra:1_nsx:1	-	8.952	/	R.VISM[147.04]QK[325.13]GGNM[147.04]K.E(2)+R.AGVHIK[325.13]LPNLGK.H(2)	sp|P12277|KCRB_HUMAN+sp|P12277|KCRB_HUMAN	1	1000
1	072419_HeLa_invitro_H_RNAse_L_control_frac10_r1.17211.17211.1	xl	5.89E-02(0.9938+1.0000)	intra:1_nsx:1	-	6.4367	/	R.TTTGNK[333.14]VFGALK[136.11].G(2)+R.K[333.14]HIMGQNVADYM[147.04]R[162.12].Y(2)	sp|P46777|RL5_HUMAN+sp|P46777|RL5_HUMAN	1	1000
1	072419_HeLa_invitro_H_RNAse_L_control_frac10_r1.17215.17215.1	xl	2.17E-03(1.0000+1.0000)	intra:1_nsx:1	-	7.8396	/	R.NGK[333.14]TSK[136.11].K(2)+K.TEWLDGK[333.14]HVVFGK[136.11].V(2)	sp|P62937|PPIA_HUMAN+sp|P62937|PPIA_HUMAN	1	1000
1	072419_HeLa_invitro_H_RNAse_L_control_frac10_r1.17218.17218.1	xl	1.33E-01(0.9994+1.0000)	intra:1_nsx:1	-	7.9517	/	R.TTTGNK[325.13]VFGALK.G(2)+R.K[325.13]HIMGQNVADYM[147.04]R.Y(2)	sp|P46777|RL5_HUMAN+sp|P46777|RL5_HUMAN	1	1000
1	072419_HeLa_invitro_H_RNAse_L_control_frac10_r1.17221.17221.1	xl	2.11E-03(1.0000+1.0000)	intra:1_nsx:1	-	7.2329	/	R.NGK[325.13]TSK.K(2)+K.TEWLDGK[325.13]HVVFGK.V(2)	sp|P62937|PPIA_HUMAN+sp|P62937|PPIA_HUMAN	1	1000
1	072419_HeLa_invitro_H_RNAse_L_control_frac10_r1.17227.17227.1	xl	4.53E-03(1.0000+1.0000)	intra:1_nsx:1	-	6.4912	/	R.NGK[325.13]TSK.K(2)+K.TEWLDGK[325.13]HVVFGK.V(2)	sp|P62937|PPIA_HUMAN+sp|P62937|PPIA_HUMAN	1	1000
1	072419_HeLa_invitro_H_RNAse_L_control_frac10_r1.17247.17247.1	xl	3.19E-01(0.9983+1.0000)	intra:1_nsx:1	-	4.4109	/	R.TTTGNK[325.13]VFGALK.G(2)+R.K[325.13]HIMGQNVADYM[147.04]R.Y(2)	sp|P46777|RL5_HUMAN+sp|P46777|RL5_HUMAN	1	1000
1	072419_HeLa_invitro_H_RNAse_L_control_frac10_r1.17270.17270.1	xl	4.94E-01(0.9241+1.0000)	intra:1_nsx:1	-	8.7194	/	R.NGK[333.14]TSK[136.11].K(2)+K.TEWLDGK[333.14]HVVFGK[136.11].V(2)	sp|P62937|PPIA_HUMAN+sp|P62937|PPIA_HUMAN	1	1000
1	072419_HeLa_invitro_H_RNAse_L_control_frac10_r1.17284.17284.2	xl	5.01E-06(1.0000+1.0000)	intra:1_nsx:1	-	10.829	/	K.HAVSEGTK[333.14]AVTK[136.11].Y(2)+R.K[136.11]ESYSVYVYK[333.14]VLK[136.11].Q(2)	sp|O60814|H2B1K_HUMAN,sp|Q16778|H2B2E_HUMAN+sp|O60814|H2B1K_HUMAN	1	1000
1	072419_HeLa_invitro_H_RNAse_L_control_frac10_r1.17302.17302.2	xl	2.14E-04(1.0000+1.0000)	intra:1_nsx:1	-	9.4078	/	K.HAVSEGTK[325.13]AVTK.Y(2)+R.KESYSVYVYK[325.13]VLK.Q(2)	sp|O60814|H2B1K_HUMAN,sp|Q16778|H2B2E_HUMAN+sp|O60814|H2B1K_HUMAN	1	1000
1	072419_HeLa_invitro_H_RNAse_L_control_frac10_r1.17303.17303.1	xl	8.32E-01(0.4718+0.9999)	intra:1_nsx:0	-	10.0484	/	K.AQGPK[325.13]GGGNAVK.V(2)+K.TK[325.13]FGYHIIMVEGR.K(2)	sp|Q9Y237|PIN4_HUMAN+sp|Q9Y237|PIN4_HUMAN	1	1000
0.9989	072419_HeLa_invitro_H_RNAse_L_control_frac10_r1.17309.17309.1	xl	5.51E-02(0.6992+1.0000)	intra:1_nsx:0	-	8.5276	/	R.K[325.13]NGFVVLK.G(2)+K.GRPC[160.03]K[325.13]IVEMSTSK.T(2)	sp|P63241|IF5A1_HUMAN,sp|Q9GZV4|IF5A2_HUMAN+sp|P63241|IF5A1_HUMAN,sp|Q9GZV4|IF5A2_HUMAN	1	1000
1	072419_HeLa_invitro_H_RNAse_L_control_frac10_r1.17312.17312.1	xl	2.55E-01(0.9845+1.0000)	intra:1_nsx:1	-	11.396	/	R.TTTGNK[333.14]VFGALK[136.11].G(2)+R.K[333.14]HIMGQNVADYM[147.04]R[162.12].Y(2)	sp|P46777|RL5_HUMAN+sp|P46777|RL5_HUMAN	1	1000
1	072419_HeLa_invitro_H_RNAse_L_control_frac10_r1.17345.17345.1	xl	8.53E-02(0.9996+0.9995)	intra:1_nsx:1	-	9.5724	/	K.LQALK[325.13]DTANR.L(2)+K.HQPTAIIAK[325.13]TFK.G(2)	sp|P29401|TKT_HUMAN+sp|P29401|TKT_HUMAN	1	1000
1	072419_HeLa_invitro_H_RNAse_L_control_frac10_r1.17351.17351.1	xl	7.34E-01(0.9911+1.0000)	intra:1_nsx:1	-	12.0679	/	K.LQALK[333.14]DTANR[162.12].L(2)+K.HQPTAIIAK[333.14]TFK[136.11].G(2)	sp|P29401|TKT_HUMAN+sp|P29401|TKT_HUMAN	1	1000
0.9995	072419_HeLa_invitro_H_RNAse_L_control_frac10_r1.17362.17362.1	xl	1.70E-01(0.8201+1.0000)	intra:1_nsx:0	-	9.2041	/	R.VK[333.14]IMFNK[136.11].K(2)+R.ATLSK[333.14]HQAVQLPR[162.12].E(2)	sp|O95758|PTBP3_HUMAN+sp|O95758|PTBP3_HUMAN	1	1000
1	072419_HeLa_invitro_H_RNAse_L_control_frac10_r1.17387.17387.2	xl	4.44E-03(0.9768+0.9972)	intra:1_nsx:1	-	7.3657	/	R.K[333.14]LLASLVK[136.11].R(2)+R.LGDK[333.14]HATLQK[136.11].S(2)	sp|Q13263|TIF1B_HUMAN+sp|Q13263|TIF1B_HUMAN	1	1000
1	072419_HeLa_invitro_H_RNAse_L_control_frac10_r1.17495.17495.1	xl	1.95E+00(0.2812+0.1476)	intra:1_nsx:1	-	11.2805	/	R.K[325.13]LLASLVK.R(2)+R.LGDK[325.13]HATLQK.S(2)	sp|Q13263|TIF1B_HUMAN+sp|Q13263|TIF1B_HUMAN	1	1000
1	072419_HeLa_invitro_H_RNAse_L_control_frac10_r1.17559.17559.1	xl	1.19E+00(0.9993+0.9555)	intra:1_nsx:1	-	6.2848	/	R.GK[333.14]PLPEYHVR[162.12].L(2)+K.YFEGVSPK[333.14]SLK[136.11].H(2)	sp|P78527|PRKDC_HUMAN+sp|P78527|PRKDC_HUMAN	1	1000
1	072419_HeLa_invitro_H_RNAse_L_control_frac10_r1.17578.17578.1	xl	4.50E+00(0.8335+1.0000)	intra:1_nsx:1	-	6.1511	/	R.TAK[325.13]GEK.F(2)+K.FLDAGHK[325.13]LNFAVASR.K(2)	sp|P30101|PDIA3_HUMAN+sp|P30101|PDIA3_HUMAN	1	1000
1	072419_HeLa_invitro_H_RNAse_L_control_frac10_r1.17669.17669.1	xl	2.27E+00(0.4089+1.0000)	intra:1_nsx:1	-	8.5648	/	R.NQK[325.13]PEVR.K(2)+K.VELC[160.03]SFSGYK[325.13]IYPGHGR.R(2)	sp|P83731|RL24_HUMAN+sp|P83731|RL24_HUMAN	1	1000
1	072419_HeLa_invitro_H_RNAse_L_control_frac10_r1.17673.17673.1	xl	2.11E-01(0.4106+1.0000)	intra:1_nsx:1	-	10.2367	/	R.NQK[333.14]PEVR[162.12].K(2)+K.VELC[160.03]SFSGYK[333.14]IYPGHGR[162.12].R(2)	sp|P83731|RL24_HUMAN+sp|P83731|RL24_HUMAN	1	1000
1	072419_HeLa_invitro_H_RNAse_L_control_frac10_r1.17705.17705.1	xl	2.25E-01(0.9987+0.9997)	intra:1_nsx:1	-	7.3786	/	R.VISM[147.04]QK[325.13]GGNMK.E(2)+R.AGVHIK[325.13]LPNLGK.H(2)	sp|P12277|KCRB_HUMAN+sp|P12277|KCRB_HUMAN	1	1000
1	072419_HeLa_invitro_H_RNAse_L_control_frac10_r1.17716.17716.1	xl	1.65E-02(1.0000+0.9996)	intra:1_nsx:1	-	10.1676	/	R.VISM[147.04]QK[333.14]GGNMK[136.11].E(2)+R.AGVHIK[333.14]LPNLGK[136.11].H(2)	sp|P12277|KCRB_HUMAN+sp|P12277|KCRB_HUMAN	1	1000
1	072419_HeLa_invitro_H_RNAse_L_control_frac10_r1.17732.17732.2	xl	9.75E-01(0.9989+0.6716)	intra:1_nsx:1	-	12.1362	/	K.K[136.11]PDDGK[333.14]MK[136.11].G(2)+R.FEELGVK[333.14]FVK[136.11].K(2)	sp|Q04760|LGUL_HUMAN+sp|Q04760|LGUL_HUMAN	1	1000
1	072419_HeLa_invitro_H_RNAse_L_control_frac10_r1.17735.17735.1	xl	4.73E-01(0.9930+0.8502)	intra:1_nsx:1	-	4.3531	/	K.KPDDGK[325.13]MK.G(2)+R.FEELGVK[325.13]FVK.K(2)	sp|Q04760|LGUL_HUMAN+sp|Q04760|LGUL_HUMAN	1	1000
1	072419_HeLa_invitro_H_RNAse_L_control_frac10_r1.17739.17739.1	xl	3.28E-04(1.0000+1.0000)	intra:1_nsx:1	-	8.7256	/	R.TTTGNK[333.14]VFGALK[136.11].G(2)+R.K[333.14]HIM[147.04]GQNVADYMR[162.12].Y(2)	sp|P46777|RL5_HUMAN+sp|P46777|RL5_HUMAN	1	1000
1	072419_HeLa_invitro_H_RNAse_L_control_frac10_r1.17750.17750.1	xl	7.25E-03(0.9997+1.0000)	intra:1_nsx:1	-	7.9508	/	K.K[136.11]PDDGK[333.14]MK[136.11].G(2)+R.FEELGVK[333.14]FVK[136.11].K(2)	sp|Q04760|LGUL_HUMAN+sp|Q04760|LGUL_HUMAN	1	1000
1	072419_HeLa_invitro_H_RNAse_L_control_frac10_r1.17769.17769.1	xl	1.65E-03(1.0000+0.9996)	intra:1_nsx:1	-	7.5265	/	K.KPDDGK[325.13]MK.G(2)+R.FEELGVK[325.13]FVK.K(2)	sp|Q04760|LGUL_HUMAN+sp|Q04760|LGUL_HUMAN	1	1000
1	072419_HeLa_invitro_H_RNAse_L_control_frac10_r1.17782.17782.1	xl	1.51E+00(0.9218+1.0000)	intra:1_nsx:1	-	9.8639	/	R.TAK[325.13]GEK.F(2)+K.FLDAGHK[325.13]LNFAVASR.K(2)	sp|P30101|PDIA3_HUMAN+sp|P30101|PDIA3_HUMAN	1	1000
1	072419_HeLa_invitro_H_RNAse_L_control_frac10_r1.17793.17793.1	xl	2.31E+00(0.8894+1.0000)	intra:1_nsx:1	-	11.885	/	R.TAK[333.14]GEK[136.11].F(2)+K.FLDAGHK[333.14]LNFAVASR[162.12].K(2)	sp|P30101|PDIA3_HUMAN+sp|P30101|PDIA3_HUMAN	1	1000
1	072419_HeLa_invitro_H_RNAse_L_control_frac10_r1.17812.17812.1	xl	6.99E+00(1.0000+1.0000)	intra:0_nsx:1	-	6.2064	/	R.VIWGK[325.13]VTR.A(2)+R.THQK[325.13]FVIATSTK.L(2)	sp|P18077|RL35A_HUMAN+sp|Q02878|RL6_HUMAN	2	1000
0.9997	072419_HeLa_invitro_H_RNAse_L_control_frac10_r1.17830.17830.1	xl	1.18E-02(0.7515+1.0000)	intra:1_nsx:0	-	6.9295	/	R.FQQK[333.14]QIENVLR[162.12].R(2)+R.YIK[333.14]EYVTC[160.03]HTC[160.03]R[162.12].S(2)	sp|P20042|IF2B_HUMAN+sp|P20042|IF2B_HUMAN	1	1000
1	072419_HeLa_invitro_H_RNAse_L_control_frac10_r1.17833.17833.1	xl	6.77E-04(1.0000+0.9999)	intra:1_nsx:1	-	7.3581	/	K.KPDDGK[325.13]MK.G(2)+R.FEELGVK[325.13]FVK.K(2)	sp|Q04760|LGUL_HUMAN+sp|Q04760|LGUL_HUMAN	1	1000
1	072419_HeLa_invitro_H_RNAse_L_control_frac10_r1.17851.17851.1	xl	3.01E-02(0.9996+0.9981)	intra:1_nsx:1	-	8.2593	/	K.K[136.11]PDDGK[333.14]MK[136.11].G(2)+R.FEELGVK[333.14]FVK[136.11].K(2)	sp|Q04760|LGUL_HUMAN+sp|Q04760|LGUL_HUMAN	1	1000
1	072419_HeLa_invitro_H_RNAse_L_control_frac10_r1.17875.17875.2	xl	2.79E+00(0.3183+1.0000)	intra:1_nsx:1	-	7.6493	/	R.TAK[333.14]GEK[136.11].F(2)+K.FLDAGHK[333.14]LNFAVASR[162.12].K(2)	sp|P30101|PDIA3_HUMAN+sp|P30101|PDIA3_HUMAN	1	1000
1	072419_HeLa_invitro_H_RNAse_L_control_frac10_r1.17887.17887.1	xl	8.13E-01(0.9541+1.0000)	intra:1_nsx:1	-	8.7604	/	R.TAK[325.13]GEK.F(2)+K.FLDAGHK[325.13]LNFAVASR.K(2)	sp|P30101|PDIA3_HUMAN+sp|P30101|PDIA3_HUMAN	1	1000
1	072419_HeLa_invitro_H_RNAse_L_control_frac10_r1.17890.17890.1	xl	2.98E-01(0.7325+1.0000)	intra:1_nsx:1	-	8.6431	/	R.LSVDYGK[333.14]K[136.11].S(2)+R.HGK[333.14]YMAC[160.03]C[160.03]LLYR[162.12].G(2)	sp|Q71U36|TBA1A_HUMAN,sp|P68363|TBA1B_HUMAN,sp|Q9BQE3|TBA1C_HUMAN+sp|Q71U36|TBA1A_HUMAN,sp|P68363|TBA1B_HUMAN,sp|Q9BQE3|TBA1C_HUMAN	1	1000
1	072419_HeLa_invitro_H_RNAse_L_control_frac10_r1.17891.17891.1	xl	9.84E-01(0.9451+1.0000)	intra:1_nsx:1	-	7.6362	/	R.TAK[325.13]GEK.F(2)+K.FLDAGHK[325.13]LNFAVASR.K(2)	sp|P30101|PDIA3_HUMAN+sp|P30101|PDIA3_HUMAN	1	1000
1	072419_HeLa_invitro_H_RNAse_L_control_frac10_r1.17907.17907.1	xl	2.21E-01(0.9566+1.0000)	intra:1_nsx:1	-	8.1157	/	R.TAK[333.14]GEK[136.11].F(2)+K.FLDAGHK[333.14]LNFAVASR[162.12].K(2)	sp|P30101|PDIA3_HUMAN+sp|P30101|PDIA3_HUMAN	1	1000
1	072419_HeLa_invitro_H_RNAse_L_control_frac10_r1.17923.17923.1	xl	1.89E-01(0.9760+1.0000)	intra:1_nsx:1	-	6.5685	/	R.LSVDYGK[325.13]K.S(2)+R.HGK[325.13]YMAC[160.03]C[160.03]LLYR.G(2)	sp|Q71U36|TBA1A_HUMAN,sp|P68363|TBA1B_HUMAN,sp|Q9BQE3|TBA1C_HUMAN+sp|Q71U36|TBA1A_HUMAN,sp|P68363|TBA1B_HUMAN,sp|Q9BQE3|TBA1C_HUMAN	1	1000
1	072419_HeLa_invitro_H_RNAse_L_control_frac10_r1.17944.17944.1	xl	7.95E-02(1.0000+1.0000)	intra:0_nsx:1	-	6.9405	/	R.VIWGK[325.13]VTR.A(2)+R.THQK[325.13]FVIATSTK.L(2)	sp|P18077|RL35A_HUMAN+sp|Q02878|RL6_HUMAN	2	1000
1	072419_HeLa_invitro_H_RNAse_L_control_frac10_r1.17956.17956.1	xl	1.09E-01(0.8557+1.0000)	intra:1_nsx:0	-	6.7924	/	R.LLEQK[325.13]TQESQK.K(2)+K.K[325.13]QLKPWC[160.03]WYC[160.03]NR.D(2)	sp|O43670|ZN207_HUMAN+sp|O43670|ZN207_HUMAN	1	1000
1	072419_HeLa_invitro_H_RNAse_L_control_frac10_r1.17990.17990.1	xl	1.83E+00(0.9101+1.0000)	intra:1_nsx:1	-	8.0473	/	R.TAK[325.13]GEK.F(2)+K.FLDAGHK[325.13]LNFAVASR.K(2)	sp|P30101|PDIA3_HUMAN+sp|P30101|PDIA3_HUMAN	1	1000
1	072419_HeLa_invitro_H_RNAse_L_control_frac10_r1.18002.18002.1	xl	4.10E+00(0.8445+1.0000)	intra:1_nsx:1	-	7.9356	/	R.TAK[325.13]GEK.F(2)+K.FLDAGHK[325.13]LNFAVASR.K(2)	sp|P30101|PDIA3_HUMAN+sp|P30101|PDIA3_HUMAN	1	1000
1	072419_HeLa_invitro_H_RNAse_L_control_frac10_r1.18045.18045.1	xl	8.06E-03(1.0000+1.0000)	intra:0_nsx:1	-	4.298	/	R.VIWGK[325.13]VTR.A(2)+R.THQK[325.13]FVIATSTK.L(2)	sp|P18077|RL35A_HUMAN+sp|Q02878|RL6_HUMAN	2	1000
0.9996	072419_HeLa_invitro_H_RNAse_L_control_frac10_r1.18050.18050.1	xl	1.23E-02(0.9999+1.0000)	intra:0_nsx:1	-	8.6988	/	R.VIWGK[333.14]VTR[162.12].A(2)+R.THQK[333.14]FVIATSTK[136.11].L(2)	sp|P18077|RL35A_HUMAN+sp|Q02878|RL6_HUMAN	2	1000
0.9997	072419_HeLa_invitro_H_RNAse_L_control_frac10_r1.18052.18052.1	xl	1.62E-05(1.0000+1.0000)	intra:1_nsx:0	-	10.9586	/	K.DK[333.14]MMNGGHYTYSENR[162.12].V(2)+R.AGIK[333.14]VTVAGLAGK[136.11]DPVQC[160.03]SR[162.12].D(2)	sp|Q99497|PARK7_HUMAN+sp|Q99497|PARK7_HUMAN	1	1000
1	072419_HeLa_invitro_H_RNAse_L_control_frac10_r1.18063.18063.2	xl	1.90E-07(1.0000+1.0000)	intra:1_nsx:0	-	8.2559	/	K.DK[333.14]MMNGGHYTYSENR[162.12].V(2)+R.AGIK[333.14]VTVAGLAGK[136.11]DPVQC[160.03]SR[162.12].D(2)	sp|Q99497|PARK7_HUMAN+sp|Q99497|PARK7_HUMAN	1	1000
1	072419_HeLa_invitro_H_RNAse_L_control_frac10_r1.18151.18151.1	xl	2.00E-03(1.0000+1.0000)	intra:0_nsx:1	-	9.1693	/	R.VIWGK[325.13]VTR.A(2)+R.THQK[325.13]FVIATSTK.L(2)	sp|P18077|RL35A_HUMAN+sp|Q02878|RL6_HUMAN	2	1000
1	072419_HeLa_invitro_H_RNAse_L_control_frac10_r1.18152.18152.1	xl	6.34E-04(1.0000+1.0000)	intra:0_nsx:1	-	9.3973	/	R.VIWGK[333.14]VTR[162.12].A(2)+R.THQK[333.14]FVIATSTK[136.11].L(2)	sp|P18077|RL35A_HUMAN+sp|Q02878|RL6_HUMAN	2	1000
1	072419_HeLa_invitro_H_RNAse_L_control_frac10_r1.18247.18247.1	xl	9.20E-03(1.0000+1.0000)	intra:0_nsx:1	-	8.347	/	R.VIWGK[325.13]VTR.A(2)+R.THQK[325.13]FVIATSTK.L(2)	sp|P18077|RL35A_HUMAN+sp|Q02878|RL6_HUMAN	2	1000
1	072419_HeLa_invitro_H_RNAse_L_control_frac10_r1.18297.18297.1	xl	3.39E+00(0.9985+0.9999)	intra:1_nsx:1	-	7.5055	/	K.AGGFLM[147.04]K[333.14]K[136.11].E(2)+K.LTLDK[136.11]LDVK[333.14]GK[136.11].R(2)	sp|P00558|PGK1_HUMAN+sp|P00558|PGK1_HUMAN	1	1000
0.7268	072419_HeLa_invitro_H_RNAse_L_control_frac10_r1.18308.18308.1	xl	8.93E-02(0.8221+1.0000)	intra:0_nsx:0	-	8.2699	/	R.GGSSGAK[325.13]FR.L(2)+K.VELC[160.03]SFSGYK[325.13]IYPGHGR.R(2)	sp|P62829|RL23_HUMAN+sp|P83731|RL24_HUMAN	2	1000
1	072419_HeLa_invitro_H_RNAse_L_control_frac10_r1.18315.18315.1	xl	3.80E-01(0.9989+1.0000)	intra:1_nsx:1	-	8.381	/	K.AGGFLM[147.04]K[325.13]K.E(2)+K.LTLDKLDVK[325.13]GK.R(2)	sp|P00558|PGK1_HUMAN+sp|P00558|PGK1_HUMAN	1	1000
0.9999	072419_HeLa_invitro_H_RNAse_L_control_frac10_r1.18332.18332.1	xl	3.27E-04(1.0000+1.0000)	intra:1_nsx:0	-	11.5593	/	R.K[333.14]WNTTLYEGTWR[162.12].R(2)+K.GHAYSVTGAK[333.14]QVNYR[162.12].G(2)	sp|P07384|CAN1_HUMAN+sp|P07384|CAN1_HUMAN	1	1000
1	072419_HeLa_invitro_H_RNAse_L_control_frac10_r1.18358.18358.1	xl	1.51E-02(1.0000+1.0000)	intra:1_nsx:1	-	7.8251	/	R.LWSK[325.13]AIFAGYK.R(2)+K.AK[325.13]NNTVTPGGKPNK.T(2)	sp|P18077|RL35A_HUMAN+sp|P18077|RL35A_HUMAN	1	1000
1	072419_HeLa_invitro_H_RNAse_L_control_frac10_r1.18382.18382.1	xl	1.74E-03(1.0000+1.0000)	intra:1_nsx:1	-	8.9134	/	R.GTK[325.13]VILHLK.E(2)+R.YESLTDPSKLDSGK[325.13]ELK.L(2)	sp|P08238|HS90B_HUMAN,sp|P07900|HS90A_HUMAN+sp|P08238|HS90B_HUMAN	1	1000
1	072419_HeLa_invitro_H_RNAse_L_control_frac10_r1.18410.18410.1	xl	7.47E-01(1.0000+1.0000)	intra:0_nsx:1	-	6.7917	/	R.VIWGK[325.13]VTR.A(2)+R.THQK[325.13]FVIATSTK.L(2)	sp|P18077|RL35A_HUMAN+sp|Q02878|RL6_HUMAN	2	1000
1	072419_HeLa_invitro_H_RNAse_L_control_frac10_r1.18415.18415.1	xl	2.70E-01(1.0000+1.0000)	intra:1_nsx:1	-	11.0983	/	R.GTK[325.13]VILHLK.E(2)+R.YESLTDPSKLDSGK[325.13]ELK.L(2)	sp|P08238|HS90B_HUMAN,sp|P07900|HS90A_HUMAN+sp|P08238|HS90B_HUMAN	1	1000
1	072419_HeLa_invitro_H_RNAse_L_control_frac10_r1.18457.18457.1	xl	7.08E-05(1.0000+1.0000)	intra:1_nsx:1	-	9.9605	/	R.LWSK[333.14]AIFAGYK[136.11].R(2)+K.AK[333.14]NNTVTPGGK[136.11]PNK[136.11].T(2)	sp|P18077|RL35A_HUMAN+sp|P18077|RL35A_HUMAN	1	1000
1	072419_HeLa_invitro_H_RNAse_L_control_frac10_r1.18463.18463.1	xl	1.05E-04(1.0000+1.0000)	intra:1_nsx:1	-	10.3521	/	R.LWSK[325.13]AIFAGYK.R(2)+K.AK[325.13]NNTVTPGGKPNK.T(2)	sp|P18077|RL35A_HUMAN+sp|P18077|RL35A_HUMAN	1	1000
0.9994	072419_HeLa_invitro_H_RNAse_L_control_frac10_r1.18538.18538.1	xl	2.20E-01(0.4408+0.9871)	intra:1_nsx:0	-	10.9285	/	K.NQVIK[325.13]AER.R(2)+R.VLK[325.13]ELGFC[160.03]VHVK.H(2)	sp|Q9UK58|CCNL1_HUMAN+sp|Q9UK58|CCNL1_HUMAN	1	1000
1	072419_HeLa_invitro_H_RNAse_L_control_frac10_r1.18542.18542.1	xl	1.04E-01(1.0000+1.0000)	intra:0_nsx:1	-	5.1773	/	R.VIWGK[325.13]VTR.A(2)+R.THQK[325.13]FVIATSTK.L(2)	sp|P18077|RL35A_HUMAN+sp|Q02878|RL6_HUMAN	2	1000
1	072419_HeLa_invitro_H_RNAse_L_control_frac10_r1.18640.18640.1	xl	8.24E+00(0.1636+0.9980)	intra:1_nsx:1	-	7.7256	/	K.FM[147.04]K[325.13]PGK.V(2)+K.NK[325.13]WFFQK.L(2)	sp|P61353|RL27_HUMAN+sp|P61353|RL27_HUMAN	1	1000
1	072419_HeLa_invitro_H_RNAse_L_control_frac10_r1.18645.18645.1	xl	8.02E-01(0.7046+0.9984)	intra:1_nsx:1	-	8.3819	/	K.FM[147.04]K[333.14]PGK[136.11].V(2)+K.NK[333.14]WFFQK[136.11].L(2)	sp|P61353|RL27_HUMAN+sp|P61353|RL27_HUMAN	1	1000
1	072419_HeLa_invitro_H_RNAse_L_control_frac10_r1.18676.18676.1	xl	4.24E-03(1.0000+0.9990)	intra:1_nsx:0	-	10.7639	/	R.IHAEIK[325.13]NSLK.L(2)+R.FK[325.13]VSQVIMEK.S(2)	sp|O75475|PSIP1_HUMAN+sp|O75475|PSIP1_HUMAN	1	1000
0.9999	072419_HeLa_invitro_H_RNAse_L_control_frac10_r1.18687.18687.1	xl	5.99E-03(0.9944+0.9999)	intra:1_nsx:0	-	9.3796	/	R.IHAEIK[333.14]NSLK[136.11].L(2)+R.FK[333.14]VSQVIMEK[136.11].S(2)	sp|O75475|PSIP1_HUMAN+sp|O75475|PSIP1_HUMAN	1	1000
1	072419_HeLa_invitro_H_RNAse_L_control_frac10_r1.18692.18692.1	xl	4.75E-03(0.9999+0.9989)	intra:1_nsx:0	-	8.1002	/	R.IHAEIK[325.13]NSLK.L(2)+R.FK[325.13]VSQVIMEK.S(2)	sp|O75475|PSIP1_HUMAN+sp|O75475|PSIP1_HUMAN	1	1000
1	072419_HeLa_invitro_H_RNAse_L_control_frac10_r1.18699.18699.1	xl	2.78E-03(1.0000+1.0000)	intra:1_nsx:1	-	9.3523	/	R.VISMQK[325.13]GGNM[147.04]K.E(2)+R.AGVHIK[325.13]LPNLGK.H(2)	sp|P12277|KCRB_HUMAN+sp|P12277|KCRB_HUMAN	1	1000
0.9999	072419_HeLa_invitro_H_RNAse_L_control_frac10_r1.18728.18728.1	xl	2.30E-02(0.9663+1.0000)	intra:1_nsx:0	-	9.4331	/	K.YK[325.13]PLDLRPK.K(2)+R.VLTVINQTQK[325.13]ENLR.K(2)	sp|P42766|RL35_HUMAN+sp|P42766|RL35_HUMAN	1	1000
0.9997	072419_HeLa_invitro_H_RNAse_L_control_frac10_r1.18731.18731.1	xl	1.08E-01(0.5026+1.0000)	intra:1_nsx:0	-	7.0821	/	K.YK[333.14]PLDLR[162.12]PK[136.11].K(2)+R.VLTVINQTQK[333.14]ENLR[162.12].K(2)	sp|P42766|RL35_HUMAN+sp|P42766|RL35_HUMAN	1	1000
1	072419_HeLa_invitro_H_RNAse_L_control_frac10_r1.18742.18742.1	xl	1.01E+00(0.9041+1.0000)	intra:1_nsx:1	-	7.6993	/	R.WIESK[325.13]HK.S(2)+K.SDFGK[325.13]FVLSSGK.F(2)	sp|P27797|CALR_HUMAN+sp|P27797|CALR_HUMAN	1	1000
0.9916	072419_HeLa_invitro_H_RNAse_L_control_frac10_r1.18755.18755.2	xl	3.37E-02(0.6713+1.0000)	intra:1_nsx:0	-	12.5293	/	K.DIREEAEK[325.13]YAK.E(2)+K.LVLSK[325.13]LYEEGSNKR.L(2)	sp|P25788|PSA3_HUMAN+sp|P25788|PSA3_HUMAN	1	1000
1	072419_HeLa_invitro_H_RNAse_L_control_frac10_r1.18760.18760.2	xl	2.53E-01(0.8782+1.0000)	intra:1_nsx:1	-	8.5048	/	R.WIESK[333.14]HK[136.11].S(2)+K.SDFGK[333.14]FVLSSGK[136.11].F(2)	sp|P27797|CALR_HUMAN+sp|P27797|CALR_HUMAN	1	1000
1	072419_HeLa_invitro_H_RNAse_L_control_frac10_r1.18764.18764.1	xl	7.29E-01(0.9289+1.0000)	intra:1_nsx:1	-	8.6805	/	R.WIESK[325.13]HK.S(2)+K.SDFGK[325.13]FVLSSGK.F(2)	sp|P27797|CALR_HUMAN+sp|P27797|CALR_HUMAN	1	1000
1	072419_HeLa_invitro_H_RNAse_L_control_frac10_r1.18847.18847.1	xl	8.79E+00(0.5546+1.0000)	intra:1_nsx:1	-	4.7489	/	R.WIESK[325.13]HK.S(2)+K.SDFGK[325.13]FVLSSGK.F(2)	sp|P27797|CALR_HUMAN+sp|P27797|CALR_HUMAN	1	1000
1	072419_HeLa_invitro_H_RNAse_L_control_frac10_r1.18849.18849.1	xl	8.35E-02(0.9848+0.9999)	intra:1_nsx:1	-	6.6162	/	R.AILYK[325.13]R.L(2)+R.FVK[325.13]WPR.Y(2)	sp|P62424|RL7A_HUMAN+sp|P62424|RL7A_HUMAN	1	1000
0.9973	072419_HeLa_invitro_H_RNAse_L_control_frac10_r1.18861.18861.1	xl	4.29E+00(0.1412+0.9039)	intra:0_nsx:1	-	5.5069	/	R.EHLEK[325.13]K.G(2)+K.MLETK[325.13]WSLLQQQK.T(2)	sp|P05783|K1C18_HUMAN+sp|P05787|K2C8_HUMAN	2	1000
1	072419_HeLa_invitro_H_RNAse_L_control_frac10_r1.18868.18868.1	xl	1.73E+00(0.7687+1.0000)	intra:1_nsx:1	-	6.1099	/	R.AVK[333.14]FQR[162.12].A(2)+K.VELC[160.03]SFSGYK[333.14]IYPGHGR[162.12].R(2)	sp|P83731|RL24_HUMAN+sp|P83731|RL24_HUMAN	1	1000
1	072419_HeLa_invitro_H_RNAse_L_control_frac10_r1.18901.18901.1	xl	1.85E+00(0.7676+1.0000)	intra:1_nsx:1	-	8.3531	/	R.AILYK[333.14]R[162.12].L(2)+R.FVK[333.14]WPR[162.12].Y(2)	sp|P62424|RL7A_HUMAN+sp|P62424|RL7A_HUMAN	1	1000
1	072419_HeLa_invitro_H_RNAse_L_control_frac10_r1.18956.18956.1	xl	7.02E-02(0.9902+0.9997)	intra:1_nsx:1	-	5.3796	/	R.AILYK[325.13]R.L(2)+R.FVK[325.13]WPR.Y(2)	sp|P62424|RL7A_HUMAN+sp|P62424|RL7A_HUMAN	1	1000
1	072419_HeLa_invitro_H_RNAse_L_control_frac10_r1.18957.18957.1	xl	3.27E-02(0.9910+1.0000)	intra:1_nsx:1	-	6.4859	/	R.VK[325.13]ILFNK.K(2)+R.ITLSK[325.13]HQNVQLPR.E(2)	sp|P26599|PTBP1_HUMAN+sp|P26599|PTBP1_HUMAN	1	1000
1	072419_HeLa_invitro_H_RNAse_L_control_frac10_r1.18961.18961.1	xl	5.73E-03(0.9928+1.0000)	intra:1_nsx:1	-	6.6527	/	R.VK[333.14]ILFNK[136.11].K(2)+R.ITLSK[333.14]HQNVQLPR[162.12].E(2)	sp|P26599|PTBP1_HUMAN+sp|P26599|PTBP1_HUMAN	1	1000
1	072419_HeLa_invitro_H_RNAse_L_control_frac10_r1.18975.18975.1	xl	5.55E-02(0.9847+1.0000)	intra:1_nsx:1	-	7.8572	/	R.VK[325.13]ILFNK.K(2)+R.ITLSK[325.13]HQNVQLPR.E(2)	sp|P26599|PTBP1_HUMAN+sp|P26599|PTBP1_HUMAN	1	1000
0.641	072419_HeLa_invitro_H_RNAse_L_control_frac10_r1.18988.18988.1	xl	5.06E+00(0.1033+1.0000)	intra:0_nsx:0	-	4.0103	/	R.TFYEK[333.14]R[162.12].M(2)+K.VELC[160.03]SFSGYK[333.14]IYPGHGR[162.12].R(2)	sp|P62753|RS6_HUMAN+sp|P83731|RL24_HUMAN	2	1000
1	072419_HeLa_invitro_H_RNAse_L_control_frac10_r1.18997.18997.1	xl	6.71E+00(0.4934+1.0000)	intra:1_nsx:1	-	4.4269	/	K.MTSGK[333.14]IK[136.11].K(2)+K.FLDAGHK[333.14]LNFAVASR[162.12].K(2)	sp|P30101|PDIA3_HUMAN+sp|P30101|PDIA3_HUMAN	1	1000
1	072419_HeLa_invitro_H_RNAse_L_control_frac10_r1.19017.19017.1	xl	4.75E-01(0.9760+1.0000)	intra:1_nsx:1	-	5.2445	/	K.MTSGK[325.13]IK.K(2)+K.FLDAGHK[325.13]LNFAVASR.K(2)	sp|P30101|PDIA3_HUMAN+sp|P30101|PDIA3_HUMAN	1	1000
1	072419_HeLa_invitro_H_RNAse_L_control_frac10_r1.19022.19022.2	xl	4.33E-03(1.0000+1.0000)	intra:1_nsx:1	-	6.0644	/	K.KDWYDVK[325.13]APAM[147.04]FNIR.N(2)+K.LMELHGEGSSSGK[325.13]ATGDETGAK.V(2)	sp|P61247|RS3A_HUMAN+sp|P61247|RS3A_HUMAN	1	1000
0.9998	072419_HeLa_invitro_H_RNAse_L_control_frac10_r1.19079.19079.1	xl	8.07E+00(0.5938+0.8207)	intra:1_nsx:0	-	1.1078	/	K.SLFK[325.13]R.L(2)+R.K[325.13]FIQTFGK.E(2)	sp|P78527|PRKDC_HUMAN+sp|P78527|PRKDC_HUMAN	1	1000
1	072419_HeLa_invitro_H_RNAse_L_control_frac10_r1.19106.19106.1	xl	1.46E-01(0.4736+1.0000)	intra:1_nsx:1	-	4.3716	/	R.EAAK[333.14]ALDK[136.11]R[162.12].Q(2)+K.LGEWVGLC[160.03]K[333.14]IDR[162.12].E(2)	sp|P25398|RS12_HUMAN+sp|P25398|RS12_HUMAN	1	1000
1	072419_HeLa_invitro_H_RNAse_L_control_frac10_r1.19138.19138.1	xl	1.17E-01(0.8479+1.0000)	intra:1_nsx:0	-	7.6273	/	R.EAAK[325.13]ALDKR.Q(2)+K.LGEWVGLC[160.03]K[325.13]IDR.E(2)	sp|P25398|RS12_HUMAN+sp|P25398|RS12_HUMAN	1	1000
1	072419_HeLa_invitro_H_RNAse_L_control_frac10_r1.19151.19151.1	xl	1.31E-01(0.9770+1.0000)	intra:1_nsx:1	-	9.7903	/	K.IAGYVTHLMK[325.13]R.L(2)+R.GISIK[325.13]LQEEER.E(2)	sp|P08708|RS17_HUMAN+sp|P08708|RS17_HUMAN	1	1000
1	072419_HeLa_invitro_H_RNAse_L_control_frac10_r1.19153.19153.1	xl	1.13E-01(0.9999+1.0000)	intra:1_nsx:1	-	-277.247	/	R.SEVDM[147.04]LK[333.14]IR[162.12].S(2)+R.SVPHLQK[333.14]VFDR[162.12].Y(2)	sp|P07355|ANXA2_HUMAN+sp|P07355|ANXA2_HUMAN	1	1000
1	072419_HeLa_invitro_H_RNAse_L_control_frac10_r1.19156.19156.1	xl	4.99E-02(1.0000+1.0000)	intra:1_nsx:1	-	7.7774	/	R.SEVDM[147.04]LK[325.13]IR.S(2)+R.SVPHLQK[325.13]VFDR.Y(2)	sp|P07355|ANXA2_HUMAN+sp|P07355|ANXA2_HUMAN	1	1000
0.9993	072419_HeLa_invitro_H_RNAse_L_control_frac10_r1.19185.19185.1	xl	1.59E+00(0.0679+1.0000)	intra:1_nsx:0	-	3.9493	/	K.LAWAK[325.13]EK.Y(2)+R.VYC[160.03]GHEYTINNLK[325.13]FAR.H(2)	sp|Q16775|GLO2_HUMAN+sp|Q16775|GLO2_HUMAN	1	1000
0.8928	072419_HeLa_invitro_H_RNAse_L_control_frac10_r1.19191.19191.1	xl	1.21E+00(0.0346+1.0000)	intra:1_nsx:0	-	6.6489	/	K.LAWAK[333.14]EK[136.11].Y(2)+R.VYC[160.03]GHEYTINNLK[333.14]FAR[162.12].H(2)	sp|Q16775|GLO2_HUMAN+sp|Q16775|GLO2_HUMAN	1	1000
0.7961	072419_HeLa_invitro_H_RNAse_L_control_frac10_r1.19225.19225.1	xl	1.72E-01(0.2074+1.0000)	intra:0_nsx:0	-	6.194	/	K.MLLNLHK[325.13]K.S(2)+R.DIK[325.13]DTTVGTLSQR.L(2)	sp|O00487|PSDE_HUMAN+sp|P51665|PSMD7_HUMAN	2	1000
1	072419_HeLa_invitro_H_RNAse_L_control_frac10_r1.19245.19245.1	xl	1.18E-03(1.0000+1.0000)	intra:1_nsx:1	-	3.2991	/	R.VISMQK[333.14]GGNMK[136.11].E(2)+R.AGVHIK[333.14]LPNLGK[136.11].H(2)	sp|P12277|KCRB_HUMAN+sp|P12277|KCRB_HUMAN	1	1000
0.9993	072419_HeLa_invitro_H_RNAse_L_control_frac10_r1.19253.19253.1	xl	1.60E+00(0.1316+0.9650)	intra:1_nsx:0	-	5.9934	/	K.FYGVK[333.14]FR[162.12].N(2)+R.NK[333.14]VSHIDVITAEM[147.04]AK[136.11].D(2)	sp|Q9UQE7|SMC3_HUMAN+sp|Q9UQE7|SMC3_HUMAN	1	1000
1	072419_HeLa_invitro_H_RNAse_L_control_frac10_r1.19257.19257.1	xl	3.73E-02(1.0000+1.0000)	intra:1_nsx:1	-	4.8322	/	R.LLVK[325.13]LYR.F(2)+R.KEPK[325.13]SQDIYLR.L(2)	sp|Q07020|RL18_HUMAN+sp|Q07020|RL18_HUMAN	1	1000
0.7961	072419_HeLa_invitro_H_RNAse_L_control_frac10_r1.19262.19262.1	xl	6.30E-01(0.1464+1.0000)	intra:0_nsx:0	-	5.8472	/	R.EAPIDK[333.14]K[136.11].G(2)+R.LFTK[333.14]VK[136.11]PLLQVSR[162.12].Q(2)	sp|P19105|ML12A_HUMAN,sp|O14950|ML12B_HUMAN+sp|P35579|MYH9_HUMAN	2	1000
0.641	072419_HeLa_invitro_H_RNAse_L_control_frac10_r1.19269.19269.1	xl	2.82E-01(0.2934+1.0000)	intra:0_nsx:0	-	6.8447	/	R.EAPIDK[325.13]K.G(2)+R.LFTK[325.13]VKPLLQVSR.Q(2)	sp|P19105|ML12A_HUMAN,sp|O14950|ML12B_HUMAN+sp|P35579|MYH9_HUMAN	2	1000
0.7961	072419_HeLa_invitro_H_RNAse_L_control_frac10_r1.19274.19274.1	xl	2.65E-02(0.3170+1.0000)	intra:0_nsx:0	-	4.7497	/	R.GAFGK[333.14]PQGTVAR[162.12].V(2)+K.VELC[160.03]SFSGYK[333.14]IYPGHGR[162.12].R(2)	sp|Q96L21|RL10L_HUMAN,sp|P27635|RL10_HUMAN+sp|P83731|RL24_HUMAN	2	1000
1	072419_HeLa_invitro_H_RNAse_L_control_frac10_r1.19282.19282.1	xl	4.55E-02(0.9637+0.9992)	intra:1_nsx:0	-	6.1463	/	R.YYNKVPVEK[325.13]R.V(2)+R.VFK[325.13]NLQLFM[147.04]ENK.Q(2)	sp|P11387|TOP1_HUMAN+sp|P11387|TOP1_HUMAN	1	1000
0.9999	072419_HeLa_invitro_H_RNAse_L_control_frac10_r1.19298.19298.1	xl	1.10E-02(0.9998+0.9999)	intra:1_nsx:0	-	8.1344	/	R.YYNK[136.11]VPVEK[333.14]R[162.12].V(2)+R.VFK[333.14]NLQLFM[147.04]ENK[136.11].Q(2)	sp|P11387|TOP1_HUMAN+sp|P11387|TOP1_HUMAN	1	1000
1	072419_HeLa_invitro_H_RNAse_L_control_frac10_r1.19323.19323.1	xl	4.61E-02(0.9998+1.0000)	intra:1_nsx:1	-	6.1018	/	R.TTTGNK[325.13]VFGALK.G(2)+R.K[325.13]HIMGQNVADYMR.Y(2)	sp|P46777|RL5_HUMAN+sp|P46777|RL5_HUMAN	1	1000
1	072419_HeLa_invitro_H_RNAse_L_control_frac10_r1.19337.19337.1	xl	1.60E-02(1.0000+1.0000)	intra:1_nsx:1	-	7.0082	/	R.VISMQK[325.13]GGNMK.E(2)+R.AGVHIK[325.13]LPNLGK.H(2)	sp|P12277|KCRB_HUMAN+sp|P12277|KCRB_HUMAN	1	1000
1	072419_HeLa_invitro_H_RNAse_L_control_frac10_r1.19359.19359.1	xl	7.14E-01(0.9938+1.0000)	intra:1_nsx:1	-	4.9581	/	R.WK[333.14]QSVELC[160.03]K[136.11].K(2)+R.LEK[333.14]HELIEFR[162.12].R(2)	sp|Q00610|CLH1_HUMAN+sp|Q00610|CLH1_HUMAN	1	1000
1	072419_HeLa_invitro_H_RNAse_L_control_frac10_r1.19361.19361.1	xl	5.93E-01(0.9919+0.9997)	intra:1_nsx:1	-	8.5576	/	R.WK[325.13]QSVELC[160.03]K.K(2)+R.LEK[325.13]HELIEFR.R(2)	sp|Q00610|CLH1_HUMAN+sp|Q00610|CLH1_HUMAN	1	1000
1	072419_HeLa_invitro_H_RNAse_L_control_frac10_r1.19371.19371.1	xl	2.04E-03(1.0000+1.0000)	intra:1_nsx:1	-	6.5276	/	R.VISMQK[325.13]GGNMK.E(2)+R.AGVHIK[325.13]LPNLGK.H(2)	sp|P12277|KCRB_HUMAN+sp|P12277|KCRB_HUMAN	1	1000
1	072419_HeLa_invitro_H_RNAse_L_control_frac10_r1.19393.19393.1	xl	1.27E-02(0.9999+1.0000)	intra:1_nsx:1	-	4.1139	/	R.TTTGNK[325.13]VFGALK.G(2)+R.K[325.13]HIMGQNVADYMR.Y(2)	sp|P46777|RL5_HUMAN+sp|P46777|RL5_HUMAN	1	1000
0.9962	072419_HeLa_invitro_H_RNAse_L_control_frac10_r1.19405.19405.1	xl	1.06E-01(0.2748+1.0000)	intra:1_nsx:0	-	-243.203	/	R.LVASSK[333.14]INSR[162.12].S(2)+R.AANNQGVK[333.14]FSVFIHQPR[162.12].A(2)	sp|Q9BPX7|CG025_HUMAN+sp|Q9BPX7|CG025_HUMAN	1	1000
1	072419_HeLa_invitro_H_RNAse_L_control_frac10_r1.19420.19420.1	xl	1.40E-02(0.9632+1.0000)	intra:1_nsx:0	-	5.6693	/	R.LVASSK[325.13]INSR.S(2)+R.AANNQGVK[325.13]FSVFIHQPR.A(2)	sp|Q9BPX7|CG025_HUMAN+sp|Q9BPX7|CG025_HUMAN	1	1000
1	072419_HeLa_invitro_H_RNAse_L_control_frac10_r1.19421.19421.1	xl	2.12E-02(0.9998+1.0000)	intra:1_nsx:1	-	5.1753	/	K.AGGFLMK[333.14]K[136.11].E(2)+K.LTLDK[136.11]LDVK[333.14]GK[136.11].R(2)	sp|P00558|PGK1_HUMAN+sp|P00558|PGK1_HUMAN	1	1000
1	072419_HeLa_invitro_H_RNAse_L_control_frac10_r1.19426.19426.1	xl	2.37E-01(0.9996+0.9999)	intra:1_nsx:1	-	6.6335	/	K.AGGFLMK[333.14]K[136.11].E(2)+K.LTLDK[136.11]LDVK[333.14]GK[136.11].R(2)	sp|P00558|PGK1_HUMAN+sp|P00558|PGK1_HUMAN	1	1000
1	072419_HeLa_invitro_H_RNAse_L_control_frac10_r1.19432.19432.1	xl	6.58E-02(1.0000+1.0000)	intra:1_nsx:1	-	7.2858	/	K.AGGFLMK[325.13]K.E(2)+K.LTLDKLDVK[325.13]GK.R(2)	sp|P00558|PGK1_HUMAN+sp|P00558|PGK1_HUMAN	1	1000
1	072419_HeLa_invitro_H_RNAse_L_control_frac10_r1.19438.19438.1	xl	5.37E-01(0.9999+1.0000)	intra:1_nsx:1	-	9.1745	/	K.AGGFLMK[325.13]K.E(2)+K.LTLDKLDVK[325.13]GK.R(2)	sp|P00558|PGK1_HUMAN+sp|P00558|PGK1_HUMAN	1	1000
1	072419_HeLa_invitro_H_RNAse_L_control_frac10_r1.19493.19493.1	xl	1.54E-01(0.9941+1.0000)	intra:1_nsx:1	-	4.7788	/	K.SGFNSK[325.13]SGQR.G(2)+K.IVGC[160.03]SVHK[325.13]GFAFVQYVNER.N(2)	sp|P07910|HNRPC_HUMAN+sp|P07910|HNRPC_HUMAN	1	1000
0.823	072419_HeLa_invitro_H_RNAse_L_control_frac10_r1.19501.19501.2	xl	7.41E-01(0.0462+1.0000)	intra:1_nsx:0	-	7.5289	/	R.RPGEK[325.13]TYTQR.C(2)+K.ISDSEGFK[325.13]ANLSLLR.R(2)	sp|P23246|SFPQ_HUMAN+sp|P23246|SFPQ_HUMAN	1	1000
0.9104	072419_HeLa_invitro_H_RNAse_L_control_frac10_r1.19513.19513.1	xl	2.05E+00(0.0353+0.0028)	intra:1_nsx:0	-	11.0965	/	R.VLMK[333.14]LQEQQK[136.11].K(2)+K.EVC[160.03]K[333.14]MLIHMR[162.12].H(2)	sp|O15381|NVL_HUMAN+sp|O15381|NVL_HUMAN	1	1000
0.9196	072419_HeLa_invitro_H_RNAse_L_control_frac10_r1.19595.19595.1	xl	7.55E-01(0.9893+0.9969)	intra:0_nsx:0	-	9.9523	/	R.LIK[325.13]VHLDK.A(2)+R.AGK[325.13]IVVNLTGR.L(2)	sp|P62081|RS7_HUMAN+sp|P62244|RS15A_HUMAN	2	1000
1	072419_HeLa_invitro_H_RNAse_L_control_frac10_r1.19712.19712.1	xl	1.73E+00(0.4434+0.8169)	intra:1_nsx:1	-	6.3398	/	K.FMK[333.14]PGK[136.11].V(2)+K.NK[333.14]WFFQK[136.11].L(2)	sp|P61353|RL27_HUMAN+sp|P61353|RL27_HUMAN	1	1000
1	072419_HeLa_invitro_H_RNAse_L_control_frac10_r1.19719.19719.1	xl	1.40E-03(1.0000+1.0000)	intra:1_nsx:1	-	8.8213	/	R.ALSTGEK[333.14]GFGYK[136.11].G(2)+R.HNGTGGK[333.14]SIYGEK[136.11]FEDENFILK[136.11].H(2)	sp|P62937|PPIA_HUMAN+sp|P62937|PPIA_HUMAN	1	1000
1	072419_HeLa_invitro_H_RNAse_L_control_frac10_r1.19721.19721.1	xl	3.96E-03(1.0000+1.0000)	intra:1_nsx:1	-	8.7773	/	R.ALSTGEK[333.14]GFGYK[136.11].G(2)+R.HNGTGGK[333.14]SIYGEK[136.11]FEDENFILK[136.11].H(2)	sp|P62937|PPIA_HUMAN+sp|P62937|PPIA_HUMAN	1	1000
1	072419_HeLa_invitro_H_RNAse_L_control_frac10_r1.19736.19736.1	xl	5.54E-04(1.0000+1.0000)	intra:1_nsx:1	-	4.2399	/	R.ALSTGEK[325.13]GFGYK.G(2)+R.HNGTGGK[325.13]SIYGEKFEDENFILK.H(2)	sp|P62937|PPIA_HUMAN+sp|P62937|PPIA_HUMAN	1	1000
1	072419_HeLa_invitro_H_RNAse_L_control_frac10_r1.19767.19767.1	xl	1.34E-01(0.8720+0.9999)	intra:1_nsx:1	-	5.2194	/	K.FMK[325.13]PGK.V(2)+K.NK[325.13]WFFQK.L(2)	sp|P61353|RL27_HUMAN+sp|P61353|RL27_HUMAN	1	1000
1	072419_HeLa_invitro_H_RNAse_L_control_frac10_r1.19778.19778.1	xl	2.56E+00(0.9339+1.0000)	intra:1_nsx:1	-	11.5873	/	R.DGK[325.13]ALER.F(2)+K.FLDAGHK[325.13]LNFAVASR.K(2)	sp|P30101|PDIA3_HUMAN+sp|P30101|PDIA3_HUMAN	1	1000
1	072419_HeLa_invitro_H_RNAse_L_control_frac10_r1.19839.19839.1	xl	3.86E-01(0.9506+1.0000)	intra:1_nsx:1	-	7.0523	/	R.AK[325.13]LYR.Y(2)+R.FK[325.13]LQDVADSFKK.L(2)	sp|P49792|RBP2_HUMAN+sp|P49792|RBP2_HUMAN	1	1000
1	072419_HeLa_invitro_H_RNAse_L_control_frac10_r1.19859.19859.1	xl	2.27E-01(0.9918+1.0000)	intra:1_nsx:1	-	7.1117	/	R.K[325.13]ELATVR.T(2)+R.TIC[160.03]SHVQNM[147.04]IK[325.13]GVTLGFR.Y(2)	sp|P32969|RL9_HUMAN+sp|P32969|RL9_HUMAN	1	1000
1	072419_HeLa_invitro_H_RNAse_L_control_frac10_r1.19881.19881.1	xl	1.32E-01(0.9955+1.0000)	intra:1_nsx:1	-	7.1738	/	R.K[325.13]ELATVR.T(2)+R.TIC[160.03]SHVQNM[147.04]IK[325.13]GVTLGFR.Y(2)	sp|P32969|RL9_HUMAN+sp|P32969|RL9_HUMAN	1	1000
1	072419_HeLa_invitro_H_RNAse_L_control_frac10_r1.19923.19923.1	xl	2.24E-01(0.4868+1.0000)	intra:1_nsx:1	-	6.047	/	R.KLQIGVK[325.13]K.R(2)+R.K[325.13]LVIPSELGYGER.G(2)	sp|P26885|FKBP2_HUMAN+sp|P26885|FKBP2_HUMAN	1	1000
1	072419_HeLa_invitro_H_RNAse_L_control_frac10_r1.19937.19937.1	xl	7.77E-01(0.8839+1.0000)	intra:1_nsx:1	-	5.1943	/	R.AVVPSK[325.13]R.Q(2)+K.IVGC[160.03]SVHK[325.13]GFAFVQYVNER.N(2)	sp|P07910|HNRPC_HUMAN+sp|P07910|HNRPC_HUMAN	1	1000
1	072419_HeLa_invitro_H_RNAse_L_control_frac10_r1.19941.19941.1	xl	1.04E+00(0.8829+1.0000)	intra:1_nsx:1	-	9.2544	/	R.AVVPSK[333.14]R[162.12].Q(2)+K.IVGC[160.03]SVHK[333.14]GFAFVQYVNER[162.12].N(2)	sp|P07910|HNRPC_HUMAN+sp|P07910|HNRPC_HUMAN	1	1000
1	072419_HeLa_invitro_H_RNAse_L_control_frac10_r1.19947.19947.1	xl	2.19E-01(0.9637+1.0000)	intra:1_nsx:1	-	4.264	/	R.AVVPSK[333.14]R[162.12].Q(2)+K.IVGC[160.03]SVHK[333.14]GFAFVQYVNER[162.12].N(2)	sp|P07910|HNRPC_HUMAN+sp|P07910|HNRPC_HUMAN	1	1000
1	072419_HeLa_invitro_H_RNAse_L_control_frac10_r1.19948.19948.1	xl	8.69E-02(0.7299+1.0000)	intra:1_nsx:1	-	4.8944	/	R.KLQIGVK[325.13]K.R(2)+R.K[325.13]LVIPSELGYGER.G(2)	sp|P26885|FKBP2_HUMAN+sp|P26885|FKBP2_HUMAN	1	1000
1	072419_HeLa_invitro_H_RNAse_L_control_frac10_r1.19978.19978.1	xl	1.85E+00(0.9092+1.0000)	intra:1_nsx:1	-	4.9173	/	R.IPK[325.13]IQK.L(2)+K.LDK[325.13]SQIHDIVLVGGSTR.L(2)	sp|P11142|HSP7C_HUMAN+sp|P11142|HSP7C_HUMAN	1	1000
1	072419_HeLa_invitro_H_RNAse_L_control_frac10_r1.19987.19987.1	xl	5.61E-01(0.0553+1.0000)	intra:1_nsx:1	-	5.7505	/	R.K[136.11]LQIGVK[333.14]K[136.11].R(2)+R.K[333.14]LVIPSELGYGER[162.12].G(2)	sp|P26885|FKBP2_HUMAN+sp|P26885|FKBP2_HUMAN	1	1000
0.9995	072419_HeLa_invitro_H_RNAse_L_control_frac10_r1.19988.19988.1	xl	5.39E-01(0.9811+0.9811)	homopeptide:1	-	6.8927	/	K.WVNPHK[325.13]L.-(2)+K.WVNPHK[325.13]L.-(2)	sp|P11413|G6PD_HUMAN+sp|P11413|G6PD_HUMAN	1	1000
0.9999	072419_HeLa_invitro_H_RNAse_L_control_frac10_r1.20009.20009.1	xl	4.00E-03(0.9995+0.9992)	intra:1_nsx:0	-	9.7697	/	K.IIYIVHDEVK[333.14]DK[136.11].A(2)+K.LVLSK[333.14]LYEEGSNK[136.11]R[162.12].L(2)	sp|P25788|PSA3_HUMAN+sp|P25788|PSA3_HUMAN	1	1000
0.9999	072419_HeLa_invitro_H_RNAse_L_control_frac10_r1.20021.20021.1	xl	1.05E-02(0.9670+0.9988)	intra:1_nsx:0	-	6.8616	/	R.QGDGK[325.13]WHLVYR.S(2)+R.SEVIK[325.13]NNLNPTWK.R(2)	sp|Q99829|CPNE1_HUMAN+sp|Q99829|CPNE1_HUMAN	1	1000
1	072419_HeLa_invitro_H_RNAse_L_control_frac10_r1.20023.20023.1	xl	7.26E-01(0.8912+1.0000)	intra:1_nsx:1	-	10.171	/	R.AVVPSK[325.13]R.Q(2)+K.IVGC[160.03]SVHK[325.13]GFAFVQYVNER.N(2)	sp|P07910|HNRPC_HUMAN+sp|P07910|HNRPC_HUMAN	1	1000
0.9997	072419_HeLa_invitro_H_RNAse_L_control_frac10_r1.20042.20042.1	xl	1.45E+00(0.2843+0.2540)	intra:1_nsx:0	-	4.4833	/	R.QGDGK[333.14]WHLVYR[162.12].S(2)+R.SEVIK[333.14]NNLNPTWK[136.11].R(2)	sp|Q99829|CPNE1_HUMAN+sp|Q99829|CPNE1_HUMAN	1	1000
1	072419_HeLa_invitro_H_RNAse_L_control_frac10_r1.20044.20044.1	xl	1.27E+00(0.2685+1.0000)	intra:1_nsx:1	-	6.1741	/	R.IPK[333.14]IQK[136.11].L(2)+K.LDK[333.14]SQIHDIVLVGGSTR[162.12].L(2)	sp|P11142|HSP7C_HUMAN+sp|P11142|HSP7C_HUMAN	1	1000
1	072419_HeLa_invitro_H_RNAse_L_control_frac10_r1.20090.20090.1	xl	1.43E+00(0.3358+1.0000)	intra:1_nsx:1	-	8.7495	/	R.IPK[325.13]IQK.L(2)+K.LDK[325.13]SQIHDIVLVGGSTR.L(2)	sp|P11142|HSP7C_HUMAN+sp|P11142|HSP7C_HUMAN	1	1000
1	072419_HeLa_invitro_H_RNAse_L_control_frac10_r1.20090.20090.1	xl	7.00E-01(0.2114+1.0000)	intra:1_nsx:1	-	5.5337	/	R.IPK[333.14]VQK[136.11].L(2)+K.LDK[333.14]AQIHDLVLVGGSTR[162.12].L(2)	sp|P0DMV8|HS71A_HUMAN,sp|P0DMV9|HS71B_HUMAN+sp|P0DMV8|HS71A_HUMAN,sp|P0DMV9|HS71B_HUMAN	1	1000
1	072419_HeLa_invitro_H_RNAse_L_control_frac10_r1.20091.20091.1	xl	5.47E+00(0.7528+1.0000)	intra:1_nsx:1	-	4.8377	/	R.IPK[325.13]VQK.L(2)+K.LDK[325.13]AQIHDLVLVGGSTR.L(2)	sp|P0DMV8|HS71A_HUMAN,sp|P0DMV9|HS71B_HUMAN+sp|P0DMV8|HS71A_HUMAN,sp|P0DMV9|HS71B_HUMAN	1	1000
0.948	072419_HeLa_invitro_H_RNAse_L_control_frac10_r1.20097.20097.1	xl	2.68E+00(0.0384+0.9782)	intra:1_nsx:0	-	4.3865	/	R.IK[325.13]MELQQK.D(2)+R.K[325.13]LIHDGC[160.03]LLWK.T(2)	sp|Q92974|ARHG2_HUMAN+sp|Q92974|ARHG2_HUMAN	1	1000
1	072419_HeLa_invitro_H_RNAse_L_control_frac10_r1.20197.20197.2	xl	2.82E-01(0.8276+1.0000)	intra:1_nsx:1	-	6.1037	/	R.IPK[333.14]VQK[136.11].L(2)+K.LDK[333.14]AQIHDLVLVGGSTR[162.12].L(2)	sp|P0DMV8|HS71A_HUMAN,sp|P0DMV9|HS71B_HUMAN+sp|P0DMV8|HS71A_HUMAN,sp|P0DMV9|HS71B_HUMAN	1	1000
1	072419_HeLa_invitro_H_RNAse_L_control_frac10_r1.20203.20203.1	xl	2.90E+00(0.8401+1.0000)	intra:1_nsx:1	-	1.5743	/	R.IPK[325.13]VQK.L(2)+K.LDK[325.13]AQIHDLVLVGGSTR.L(2)	sp|P0DMV8|HS71A_HUMAN,sp|P0DMV9|HS71B_HUMAN+sp|P0DMV8|HS71A_HUMAN,sp|P0DMV9|HS71B_HUMAN	1	1000
0.9999	072419_HeLa_invitro_H_RNAse_L_control_frac10_r1.20294.20294.1	xl	3.48E-03(1.0000+0.9971)	intra:1_nsx:0	-	4.031	/	R.DAVTYTEHAK[325.13]R.K(2)+R.K[325.13]TVTAMDVVYALKR.Q(2)	sp|P62805|H4_HUMAN+sp|P62805|H4_HUMAN	1	1000
0.641	072419_HeLa_invitro_H_RNAse_L_control_frac10_r1.20469.20469.1	xl	9.02E-01(0.2640+1.0000)	intra:0_nsx:0	-	4.3291	/	R.LTMK[325.13]R.M(2)+R.VQIEHISSLIK[325.13]LSK.A(2)	sp|O00232|PSD12_HUMAN+sp|O00231|PSD11_HUMAN	2	1000
1	072419_HeLa_invitro_H_RNAse_L_control_frac10_r1.20486.20486.1	xl	5.80E-02(0.9679+1.0000)	intra:1_nsx:1	-	2.0538	/	R.K[333.14]WIIFR[162.12].L(2)+R.SSSSK[333.14]QEQDLLHK[136.11].T(2)	sp|Q9BQG0|MBB1A_HUMAN+sp|Q9BQG0|MBB1A_HUMAN	1	1000
1	072419_HeLa_invitro_H_RNAse_L_control_frac10_r1.20523.20523.1	xl	6.01E-04(1.0000+1.0000)	intra:1_nsx:0	-	5.751	/	R.GIK[325.13]LVVADTR.G(2)+R.QLYVLGHEAMK[325.13]R.L(2)	sp|P22314|UBA1_HUMAN+sp|P22314|UBA1_HUMAN	1	1000
1	072419_HeLa_invitro_H_RNAse_L_control_frac10_r1.20529.20529.1	xl	7.75E-04(1.0000+1.0000)	intra:1_nsx:0	-	7.4369	/	R.GIK[325.13]LVVADTR.G(2)+R.QLYVLGHEAMK[325.13]R.L(2)	sp|P22314|UBA1_HUMAN+sp|P22314|UBA1_HUMAN	1	1000
0.9999	072419_HeLa_invitro_H_RNAse_L_control_frac10_r1.20547.20547.1	xl	1.17E-03(0.9999+0.9990)	intra:1_nsx:0	-	6.7602	/	R.GIK[333.14]LVVADTR[162.12].G(2)+R.QLYVLGHEAMK[333.14]R[162.12].L(2)	sp|P22314|UBA1_HUMAN+sp|P22314|UBA1_HUMAN	1	1000
1	072419_HeLa_invitro_H_RNAse_L_control_frac10_r1.20651.20651.1	xl	1.63E+00(0.6910+1.0000)	intra:1_nsx:1	-	5.5621	/	R.IK[325.13]ISFR.V(2)+R.EIVSGMK[325.13]YIQHTYR.K(2)	sp|P52565|GDIR1_HUMAN+sp|P52565|GDIR1_HUMAN	1	1000
1	072419_HeLa_invitro_H_RNAse_L_control_frac10_r1.20721.20721.1	xl	2.88E-04(1.0000+1.0000)	intra:1_nsx:1	-	3.3528	/	K.IYK[325.13]IGQGYLIK.D(2)+K.FIDTTSK[325.13]FGHGR.F(2)	sp|P39023|RL3_HUMAN+sp|P39023|RL3_HUMAN	1	1000
1	072419_HeLa_invitro_H_RNAse_L_control_frac10_r1.20727.20727.1	xl	4.19E-03(1.0000+1.0000)	intra:1_nsx:1	-	1.7722	/	K.IYK[325.13]IGQGYLIK.D(2)+K.FIDTTSK[325.13]FGHGR.F(2)	sp|P39023|RL3_HUMAN+sp|P39023|RL3_HUMAN	1	1000
1	072419_HeLa_invitro_H_RNAse_L_control_frac10_r1.20823.20823.1	xl	7.63E-02(0.9997+1.0000)	intra:1_nsx:1	-	2.8573	/	R.FVK[325.13]WPR.Y(2)+K.NFGIGQDIQPK[325.13]R.D(2)	sp|P62424|RL7A_HUMAN+sp|P62424|RL7A_HUMAN	1	1000
0.9993	072419_HeLa_invitro_H_RNAse_L_control_frac10_r1.20900.20900.1	xl	4.91E-01(0.1656+1.0000)	intra:1_nsx:0	-	5.3423	/	R.NFK[325.13]IIYR.R(2)+R.DAK[325.13]HTNFVEFR.N(2)	sp|P53680|AP2S1_HUMAN+sp|P53680|AP2S1_HUMAN	1	1000
1	072419_HeLa_invitro_H_RNAse_L_control_frac10_r1.20979.20979.2	xl	6.23E-04(1.0000+1.0000)	intra:1_nsx:1	-	3.3783	/	R.SNLPAK[333.14]AIGHR[162.12].L(2)+R.LWSK[333.14]AIFAGYK[136.11].R(2)	sp|P18077|RL35A_HUMAN+sp|P18077|RL35A_HUMAN	1	1000
1	072419_HeLa_invitro_H_RNAse_L_control_frac10_r1.20981.20981.1	xl	1.18E-05(1.0000+1.0000)	intra:1_nsx:1	-	2.4969	/	R.SNLPAK[325.13]AIGHR.L(2)+R.LWSK[325.13]AIFAGYK.R(2)	sp|P18077|RL35A_HUMAN+sp|P18077|RL35A_HUMAN	1	1000
0.9984	072419_HeLa_invitro_H_RNAse_L_control_frac10_r1.20984.20984.1	xl	2.80E-01(0.4403+1.0000)	intra:0_nsx:1	-	-1.3091	/	R.K[325.13]M[147.04]PLPLK.L(2)+R.ELVGHK[325.13]VNLQM[147.04]VYDSPLC[160.03]R.L(2)	sp|Q9NSD9|SYFB_HUMAN+sp|Q9Y285|SYFA_HUMAN	2	1000
1	072419_HeLa_invitro_H_RNAse_L_control_frac10_r1.21013.21013.1	xl	4.46E-04(1.0000+1.0000)	intra:1_nsx:1	-	5.7995	/	K.SAFLC[160.03]GVMK[333.14]TYR[162.12].Q(2)+R.SGK[333.14]HIGVC[160.03]ISVANNR[162.12].L(2)	sp|O60506|HNRPQ_HUMAN,sp|O43390|HNRPR_HUMAN+sp|O60506|HNRPQ_HUMAN	1	1000
0.8928	072419_HeLa_invitro_H_RNAse_L_control_frac10_r1.21026.21026.1	xl	2.20E+00(0.0266+1.0000)	intra:1_nsx:0	-	5.1849	/	R.K[325.13]FMTNR.L(2)+R.THFGGGK[325.13]TTGFGM[147.04]IYDSLDYAK.K(2)	sp|P62847|RS24_HUMAN+sp|P62847|RS24_HUMAN	1	1000
1	072419_HeLa_invitro_H_RNAse_L_control_frac10_r1.21032.21032.1	xl	9.12E-04(1.0000+1.0000)	intra:1_nsx:1	-	1.1062	/	R.VTYK[325.13]NVPNWHR.D(2)+R.GPIK[325.13]FNVWDTAGQEK.F(2)	sp|P62826|RAN_HUMAN+sp|P62826|RAN_HUMAN	1	1000
1	072419_HeLa_invitro_H_RNAse_L_control_frac10_r1.21034.21034.1	xl	1.08E-06(1.0000+1.0000)	intra:1_nsx:1	-	0.3287	/	K.SAFLC[160.03]GVMK[333.14]TYR[162.12].Q(2)+R.SGK[333.14]HIGVC[160.03]ISVANNR[162.12].L(2)	sp|O60506|HNRPQ_HUMAN,sp|O43390|HNRPR_HUMAN+sp|O60506|HNRPQ_HUMAN	1	1000
1	072419_HeLa_invitro_H_RNAse_L_control_frac10_r1.21085.21085.1	xl	5.05E-07(1.0000+1.0000)	intra:1_nsx:1	-	2.3132	/	R.SNLPAK[325.13]AIGHR.L(2)+R.LWSK[325.13]AIFAGYK.R(2)	sp|P18077|RL35A_HUMAN+sp|P18077|RL35A_HUMAN	1	1000
1	072419_HeLa_invitro_H_RNAse_L_control_frac10_r1.21091.21091.1	xl	2.21E-07(1.0000+1.0000)	intra:1_nsx:1	-	2.4804	/	R.SNLPAK[333.14]AIGHR[162.12].L(2)+R.LWSK[333.14]AIFAGYK[136.11].R(2)	sp|P18077|RL35A_HUMAN+sp|P18077|RL35A_HUMAN	1	1000
1	072419_HeLa_invitro_H_RNAse_L_control_frac10_r1.21097.21097.1	xl	8.05E-07(1.0000+1.0000)	intra:1_nsx:1	-	0.8696	/	R.SNLPAK[325.13]AIGHR.L(2)+R.LWSK[325.13]AIFAGYK.R(2)	sp|P18077|RL35A_HUMAN+sp|P18077|RL35A_HUMAN	1	1000
0.9996	072419_HeLa_invitro_H_RNAse_L_control_frac10_r1.21121.21121.1	xl	4.13E-01(0.1196+1.0000)	intra:1_nsx:0	-	1.977	/	R.K[325.13]FMTNR.L(2)+R.THFGGGK[325.13]TTGFGM[147.04]IYDSLDYAK.K(2)	sp|P62847|RS24_HUMAN+sp|P62847|RS24_HUMAN	1	1000
0.935	072419_HeLa_invitro_H_RNAse_L_control_frac10_r1.21170.21170.1	xl	1.44E+00(0.0609+0.6465)	intra:1_nsx:0	-	1.9186	/	R.FIK[325.13]LTWR.T(2)+R.VVAYNK[325.13]HGPGVSTPDVAVR.T(2)	sp|Q92859|NEO1_HUMAN+sp|Q92859|NEO1_HUMAN	1	1000
1	072419_HeLa_invitro_H_RNAse_L_control_frac10_r1.21227.21227.1	xl	3.03E+00(0.9524+1.0000)	intra:1_nsx:1	-	4.4606	/	K.TASPWK[333.14]SAR[162.12].L(2)+R.LMVHTVATFNSIK[333.14]ELNER[162.12].W(2)	sp|Q13813|SPTN1_HUMAN+sp|Q13813|SPTN1_HUMAN	1	1000
1	072419_HeLa_invitro_H_RNAse_L_control_frac10_r1.21232.21232.1	xl	1.67E-01(1.0000+0.7917)	intra:1_nsx:0	-	1.1034	/	R.VK[325.13]VFGWVHR.L(2)+K.ITIK[325.13]NDPSLPEPK.C(2)	sp|O43776|SYNC_HUMAN+sp|O43776|SYNC_HUMAN	1	1000
1	072419_HeLa_invitro_H_RNAse_L_control_frac10_r1.21233.21233.1	xl	1.02E-03(1.0000+1.0000)	intra:1_nsx:1	-	2.3617	/	R.SEVDMLK[325.13]IR.S(2)+R.SVPHLQK[325.13]VFDR.Y(2)	sp|P07355|ANXA2_HUMAN+sp|P07355|ANXA2_HUMAN	1	1000
1	072419_HeLa_invitro_H_RNAse_L_control_frac10_r1.21238.21238.1	xl	1.20E-03(1.0000+1.0000)	intra:1_nsx:1	-	4.9263	/	R.SEVDMLK[325.13]IR.S(2)+R.SVPHLQK[325.13]VFDR.Y(2)	sp|P07355|ANXA2_HUMAN+sp|P07355|ANXA2_HUMAN	1	1000
1	072419_HeLa_invitro_H_RNAse_L_control_frac10_r1.21244.21244.1	xl	1.29E-03(1.0000+1.0000)	intra:1_nsx:1	-	-279.578	/	R.SEVDMLK[333.14]IR[162.12].S(2)+R.SVPHLQK[333.14]VFDR[162.12].Y(2)	sp|P07355|ANXA2_HUMAN+sp|P07355|ANXA2_HUMAN	1	1000
0.9997	072419_HeLa_invitro_H_RNAse_L_control_frac10_r1.21289.21289.1	xl	2.42E-10(1.0000+1.0000)	homopeptide:1	-	1.8644	/	R.FSGWYDADLSPAGHEEAK[325.13]R.G(2)+R.FSGWYDADLSPAGHEEAK[325.13]R.G(2)	sp|P18669|PGAM1_HUMAN+sp|P18669|PGAM1_HUMAN	1	1000
[truncated: 6,267 more rows]

## Sheet: rep2
probability	spectrum	xlink_type	kojak_score	delta_score	e-value	ppm_error	ions	peptide	protein	num_prots	calc_neutral_pep_mass
[truncated: 3,163 more rows]

## Sheet: RNA-binding proteins
Supplementary material 1
[truncated: 1,365 more rows]
